# Supplementary material for: Peripheral Lymphocytes in Primary Liver Cancers: Elevated NK and CD8+ T Cells and Dysregulated Selenium Metabolism
Source: Biomolecules. 2024 Feb 14;14(2):222. doi: 10.3390/biom14020222 (PMC10886987; doi:10.3390/biom14020222)
Supplement: Supplementary file 1 [file biomolecules-14-00222-s001.zip › Supplementary tables.xlsx]

## Sheet: Supplementary Table 1
Supplementary Table 1. R packages involved in this study
R software	Version
seurat	4.1.0
seuratData	0.2.1
ggplot2	3.3.5
dplyr	2.1.1
ggsci	2.9
harmony	0.1.0
scuttle	1.4.0
scran	1.22.1
scDblFinder	1.9.1
paletteer	1.4.0
presto	1.0.0
patchwork	1.1.1
copykat	1.0.5

## Sheet: Supplementary Table 2
Hospital ID	Type	Proportion in percentage(%)					Cell count(cells/ml)					CD4/CD8	HBsAg	HBsAb	HBeAg	HBeAb	HBcAb	anti-HAV IgM	anti-HCV antibody	anti-HDV IgG	anti-HDV IgM
		CD19+ B cell	CD3+ T cell	CD56+CD16+ NK cell	CD3+ CD4+ T cell	CD3+ CD8+ T cell	CD19+ B cell	CD3+ T cell	CD3+ CD4+ T cell	CD3+ CD8+ T cell	CD56+CD16+ NK cell
1096711	Hepatic hemangiomas	13.3	80.2	5.6	62.8	16.3	207	1243	974	253	86	3.9	(-)0.439	<2.0	(-)0.106	(-)1.51	(-)2.03	(－)negative	(－)negative	(－)negative	(－)negative
1096039	Hepatic hemangiomas	14	80.2	5	58.5	16	239	1369	998	274	85	3.7	(-)0.490	8.1	(-)0.113	(+)0.637	(+)0.009	(－)negative	(－)negative	(－)negative	(－)negative
1027336	Hepatocarcinoma	25	67.7	6	54.7	11.8	725	1963	1586	342	174	4.6	(+)716.2	<2.0	(-)0.095	(+)0.002	(+)0.008	(－)negative	(－)negative	(－)negative	(－)negative
815894	Hepatocarcinoma	14	69	16	52	12						4.3	(+)8373	<2.0	(+)2.55	(+)0.531	(+)0.004	(－)negative	(－)negative	(－)negative	(－)negative
1032887	Hepatocarcinoma	13.7	76.5	8.5	62.5	14.5	411	2295	1875	435	255	4.3	(+)6273	<2.0	(+)4.96	(-)1.41	(+)0.008	(－)negative	(－)negative	(－)negative	(－)negative
1055312	Hepatocarcinoma	18.5	67	13.1	51.9	12.1	185	670	519	121	131	4.3	(+)380.8	10.7	(-)0.705	(-)1.31	(+)0.009	(－)negative	(－)negative	(－)negative	(－)negative
1106928	Hepatocarcinoma	8.3	73.2	17.3	58.5	14.1	100	882	705	170	209	4.1	(-)0.371	17.1	(-)0.115	(-)1.07	(+)0.014	(－)negative	(－)negative	(－)negative	(－)negative
857639	Hepatocarcinoma	13	53	29	40	10						4	(+)83.94	<2.0	(-)0.085	(+)0.787	(+)0.005	(－)negative	(－)negative	(－)negative	(－)negative
1065970	Hepatocarcinoma	10.7	71	17.3	55.2	13.8	128	851	661	165	207	4	(+)949.0	<2.0	(-)0.114	(-)1.37	(+)0.008	(－)negative	(－)negative	(－)negative	(－)negative
1104915	Hepatocarcinoma	18.8	62.7	17.2	46.4	12.1	282	937	693	180	257	3.8	(-)0.462	<2.0	(-)0.110	(+)0.003	(+)0.009	(－)negative	(－)negative	(－)negative	(－)negative
1095248	Hepatocarcinoma	14	80.2	5	58.5	16	239	1369	998	274	85	3.7	(-)0.490	8.1	(-)0.113	(+)0.637	(+)0.009	(－)negative	(－)negative	(－)negative	(－)negative
788129	Hepatocarcinoma	25	55	18	41	11						3.7	N/A	N/A	N/A	N/A	N/A	(-)negative	(-)negative	(-)negative	(-)negative
1038782	Intrahepatic cholangpcarcinoma	17.6	55.2	26.7	44.4	9.2	282	883	710	147	427	4.8	(-)0.414	159.4	(-)0.088	(-)1.47	(+)0.067	(－)negative	(－)negative	(－)negative	(－)negative
1046567	Hepatocarcinoma	13.2	69.3	16.1	52.9	15.3	238	1247	952	275	290	3.5	(-)0.354	67.2	(-)0.094	(+)0.021	(+)0.007	(－)negative	(－)negative	(+)positive	(－)negative
1054834	Hepatocarcinoma	15.7	75.7	8	57.2	16.3	188	908	686	196	96	3.5	(+)6407	<2.0	(+)2.50	(-)1.10	(+)0.008	(－)negative	(－)negative	(－)negative	(－)negative
885024	Intrahepatic cholangpcarcinoma	16	44	40	36	8						4.5	(-)0.374	450.5	(-)0.084	(-)1.37	(-)1.09	(－)negative	(－)negative	(－)negative	(－)negative
1058950	Hepatocarcinoma	37.1	54.1	7.4	41.3	11.8	742	1082	826	236	148	3.5	(+)3725	18.1	(-)0.095	(+)0.013	(+)0.009	(－)negative	(－)negative	(－)negative	(－)negative
1091449	Hepatocarcinoma	22.6	60.4	15.6	43.9	12.5	377	1006	730	209	260	3.5	(+)4132	<2.0	(-)0.105	(+)0.003	(+)0.008	(－)negative	(－)negative	(－)negative	(－)negative
1100427	Hepatocarcinoma	17.3	72.9	8.6	55.2	16	310	1311	992	287	155	3.5	(+)2411	<2.0	(-)0.118	(+)0.002	(+)0.008	(－)negative	(－)negative	(－)negative	(－)negative
1105649	Hepatocarcinoma	18.4	70.9	10	54.5	15.5	273	1050	807	229	148	3.5	(+)2696	<2.0	(+)1.35	(-)1.32	(+)0.009	(－)negative	(－)negative	(－)negative	(－)negative
1091434	Hepatocarcinoma	13.6	75.4	10.4	52.7	15.5	163	900	628	184	124	3.4	(+)2980	<2.0	(-)0.115	(+)0.006	(+)0.008	(－)negative	(－)negative	(－)negative	(－)negative
1103759	Hepatocarcinoma	24	63.4	12	48.1	14.1	193	510	387	113	96	3.4	(+)6212	<2.0	(-)0.112	(+)0.003	(+)0.009	(－)negative	(－)negative	(－)negative	(－)negative
786338	Hepatocarcinoma	19	76	3	56	17						3.3	(+)7177	666.5	(+)185.6	(-)1.86	(+)0.005	(－)negative	(－)negative	(－)negative	(－)negative
1065170	Hepatocarcinoma	11	64.3	23.5	47.9	14.4	209	1222	910	274	447	3.3	(+)6720	34.6	(-)0.106	(+)0.006	(+)0.008	(－)negative	(－)negative	(－)negative	(－)negative
1065485	Hepatocarcinoma	30.1	54	15.1	39.8	12.2	873	1566	1154	354	438	3.3	(+)1420	100.6	(-)0.219	(+)0.026	(+)0.009	(－)negative	(－)negative	(－)negative	(－)negative
1100854	Hepatocarcinoma	8.6	81	10.1	60.9	18.5	134	1265	951	288	158	3.3	(+)5918	<2.0	(-)0.218	(-)1.41	(+)0.008	(－)negative	(－)negative	(－)negative	(－)negative
1092540	Intrahepatic cholangpcarcinoma	19.9	67.6	12	53.7	12.5	352	1198	951	221	213	4.3	(-)0.419	<2.0	(-)0.117	(+)0.987	(+)0.010	(－)negative	(－)negative	(－)negative	(－)negative
782934	Hepatocarcinoma	20	67	12	48	15						3.2	(-)0.586	26.3	(-)0.116	(+)0.092	(+)0.005	(－)negative	(－)negative	(－)negative	(－)negative
1063205	Hepatocarcinoma	16.2	70.2	11.7	52.2	16.3	356	1544	1148	359	257	3.2	(+)475.5	265.6	(+)5.63	(-)1.01	(+)0.009	(－)negative	(－)negative	(－)negative	(－)negative
1093372	Hepatocarcinoma	14.7	66.7	18	47.3	14.9	123	560	397	125	151	3.2	(-)0.303	78.1	(-)0.091	(-)1.60	(-)1.58	(－)negative	(－)negative	(+)positive	(－)negative
1061032	Hepatocarcinoma	10	73.5	15.6	43.1	13.8	80	588	345	110	125	3.1	(+)5088	<2.0	(-)0.114	(+)0.859	(+)0.008	(－)negative	(－)negative	(－)negative	(－)negative
1098658	Hepatocarcinoma	11.8	75.9	11.2	55.2	17.8	121	780	568	183	115	3.1	(-)0.401	154.7	(-)0.090	(+)0.655	(+)0.008	(－)negative	(－)negative	(－)negative	(－)negative
1099753	Hepatocarcinoma	9.1	81.9	8.8	60.4	19.7						3.1	(+)7234	<2.0	(-)0.092	(+)0.002	(+)0.008	(－)negative	(－)negative	(－)negative	(－)negative
867503	Hepatocarcinoma	19	71	6	51	17						3	(+)3554	<2.0	(-)0.081	(+)0.006	(+)0.004	(－)negative	(－)negative	(－)negative	(－)negative
1064279	Hepatocarcinoma	17.9	68.9	12.4	50.7	17.1						3	(+)7155	<2.0	(-)0.090	(+)0.002	(+)0.009	(－)negative	(－)negative	(+)positive	(－)negative
1092657	Hepatocarcinoma	12.8	70.9	14.4	52.7	17.4						3	(+)3265	4.8	(+)1.06	(-)1.27	(+)0.008	(－)negative	(－)negative	(－)negative	(－)negative
1092949	Hepatocarcinoma	18.1	67.9	13.4	50.6	16.9	128	479	357	119	95	3	(-)0.302	154.5	(-)0.109	(-)1.13	(+)0.663	(－)negative	(－)negative	(+)positive	(－)negative
1095274	Hepatocarcinoma	25.9	53.7	18.5	38.5	12.8	250	519	372	124	179	3	(+)448.5	573.7	(+)23.78	(-)1.15	(+)0.009	(－)negative	(－)negative	(－)negative	(－)negative
1108785	Hepatocarcinoma	18.3	74.4	6.3	51	17.1	347	1407	963	324	120	3	(+)2750	<2.0	(-)0.716	(-)1.21	(+)0.009	(－)negative	(－)negative	(－)negative	(－)negative
784263	Hepatocarcinoma	22	69	9	49	17						2.9	(+)629.3	<2.0	(-)0.122	(+)0.035	(+)0.005	(－)negative	(－)negative	(－)negative	(－)negative
786286	Intrahepatic cholangpcarcinoma	16	74	9	59	14						4.2	(-)0.481	103.9	(-)0.080	(-)1.42	(-)1.64	(－)negative	(－)negative	(－)negative	(－)negative
788828	Hepatocarcinoma	18	62	19	40	14						2.9	(-)0.528	34	(-)0.077	(-)1.02	(+)0.005	(－)negative	(+)30.8	(－)negative	(－)negative
1055702	Hepatocarcinoma	16.7	50.3	32.1	31.1	10.6	217	654	404	138	417	2.9	(+)6523	98.2	(-)0.536	(+)0.687	(+)0.009	(－)negative	(－)negative	(－)negative	(－)negative
1100894	Hepatocarcinoma	4.8	70.9	23.3	50.7	17.6						2.9	(+)3662	<2.0	(-)0.102	(+)0.134	(+)0.008	(－)negative	(－)negative	(－)negative	(－)negative
883643	Hepatocarcinoma	8	59	32	42	15						2.8	(-)0.369	<2.0	(-)0.089	(-)1.41	(-)1.82	(－)negative	(－)negative	(－)negative	(－)negative
1051234	Intrahepatic cholangpcarcinoma	24.6	62	11.2	49	12	492	1240	980	240	224	4.1	(-)0.367	2.2	(-)0.090	(+)0.002	(+)0.007	(－)negative	(－)negative	(－)negative	(－)negative
1044402	Intrahepatic cholangpcarcinoma	10.4	82.9	6.1	59.2	17.6	73	580	414	123	43	3.4	N/A	N/A	N/A	N/A	N/A	(-)negative	(-)negative	(-)negative	(-)negative
919918	Hepatocarcinoma	14	67	18	47	17	126	603	423	153	162	2.8	N/A	N/A	N/A	N/A	N/A	(-)negative	(-)negative	(-)negative	(-)negative
1025984	Hepatocarcinoma	24.6	50.1	24.2	36.2	13	541	1103	796	285	532	2.8	(+)5851	<2.0	(-)0.173	(+)0.142	(+)0.007	(－)negative	(－)negative	(－)negative	(－)negative
1097600	Intrahepatic cholangpcarcinoma	7	67.3	23.7	51.1	15.1	67	643	489	145	226	3.4	(-)0.336	16.3	(-)0.094	(-)1.40	(+)0.644	(－)negative	(－)negative	(－)negative	(－)negative
1043914	Hepatocarcinoma	13.6	69.6	15.7	50	17.9	122	626	450	161	141	2.8	(-)0.581	19.4	(-)0.077	(+)0.257	(+)0.007	(－)negative	(－)negative	(－)negative	(－)negative
1057708	Hepatocarcinoma	10.5	63.4	25	43.2	15.4	158	951	648	231	375	2.8	(+)6071	<2.0	(+)15.54	(-)1.36	(+)0.008	(－)negative	(－)negative	(－)negative	(－)negative
1089057	Hepatocarcinoma	13.8	67.4	16.9	46.1	16.4	227	1112	761	271	278	2.8	(+)802.1	<2.0	(-)0.123	(+)0.068	(+)0.007	(－)negative	(－)negative	(－)negative	(－)negative
1270861	Intrahepatic cholangpcarcinoma	10.8	70.8	17.1	55.7	16.6	240	1577	1241	369	380	3.4	N/A	N/A	N/A	N/A	N/A	(-)negative	(-)negative	(-)negative	(-)negative
1096900	Intrahepatic cholangpcarcinoma	12.4	75.1	12	53.3	16.8	272	1649	1171	368	263	3.2	(-)0.418	36.6	(-)0.115	(+)0.112	(+)0.009	(－)negative	(－)negative	(－)negative	(－)negative
1105186	Hepatocarcinoma	18.6	68	13	48.9	17.7	403	1471	1059	383	282	2.8	(+)1744	133.7	(+)269.3	(-)1.90	(+)0.009	(－)negative	(－)negative	(－)negative	(－)negative
1071896	Hepatocarcinoma	12.6	74.9	11.8	53.3	19.6	94	558	397	146	88	2.7	(+)4460	<2.0	(-)0.118	(+)0.003	(+)0.008	(－)negative	(－)negative	(+)positive	(－)negative
1074876	Hepatocarcinoma	24.4	61.2	14.1	43.4	16.2						2.7	(+)3082	<2.0	(-)0.111	(+)0.019	(+)0.010	(－)negative	(－)negative	(+)positive	(－)negative
1236173	Intrahepatic cholangpcarcinoma	18.3	66.2	15.2	48.1	16.2	818	2960	2151	723	680	3	N/A	N/A	N/A	N/A	N/A	(-)negative	(-)negative	(-)negative	(-)negative
1088587	Hepatocarcinoma	19.4	73.2	6.3	50.5	18.6	218	821	566	209	71	2.7	(+)6709	<2.0	(+)6.00	(-)1.04	(+)0.008	(－)negative	(－)negative	(－)negative	(－)negative
1092737	Hepatocarcinoma	15.9	69.2	13.1	46.4	17.4	166	723	485	182	137	2.7	(+)7739	<2.0	(-)0.144	(+)0.097	(+)0.008	(－)negative	(－)negative	(－)negative	(－)negative
1099887	Hepatocarcinoma	11	63.1	24.6	42.7	15.9	190	1087	735	274	425	2.7	(+)7125	<2.0	(-)0.524	(-)1.23	(+)0.008	(－)negative	(－)negative	(－)negative	(－)negative
1102947	Hepatocarcinoma	14	67.2	17.9	46.4	17.5	103	494	341	129	132	2.7	(-)0.392	<2.0	(-)0.090	(+)0.591	(+)0.009	(－)negative	(－)negative	(－)negative	(－)negative
784835	Hepatocarcinoma	23	69	5	47	18						2.6	(+)6497	<2.0	(-)0.117	(+)0.004	(+)0.004	(－)negative	(－)negative	(－)negative	(－)negative
1094825	Hepatic hemangiomas	14.8	75.7	7.2	56.5	15.7	237	1214	906	251	115	3.6	(-)0.363	<2.0	(-)0.118	(-)1.56	(-)1.79	(－)negative	(－)negative	(－)negative	(－)negative
1103329	Hepatic hemangiomas	8.6	74.9	14.8	53.6	18.3						2.9	(-)0.387	42.7	(-)0.114	(+)0.746	(+)0.009	(－)negative	(－)negative	(－)negative	(－)negative
879140	Hepatocarcinoma	11	72	16	50	19						2.6	(-)0.411	84.6	(-)0.102	(+)0.026	(+)0.004	(－)negative	(－)negative	(－)negative	(－)negative
942645	Hepatocarcinoma	12	76	11	51	20	156	988	663	260	143	2.6	(+)7224	<2.0	(-)0.095	(+)0.005	(+)0.009	(－)negative	(－)negative	(－)negative	(－)negative
1072048	Hepatocarcinoma	16	74.8	8.3	52.5	19.9	176	823	578	219	91	2.6	(+)4557	12.8	(+)209.3	(+)0.812	(+)0.009	(－)negative	(－)negative	(－)negative	(－)negative
1083458	Hepatocarcinoma	12.7	78.1	8.6	55.6	21.3	210	1293	921	353	142	2.6	(-)0.392	427.1	(-)0.127	(+)0.399	(+)0.010	(－)negative	(－)negative	(－)negative	(－)negative
1086538	Hepatocarcinoma	8.1	58	33.1	40.5	15.3	175	1246	870	330	711	2.6	(+)6400	<2.0	(-)0.126	(+)0.341	(+)0.008	(－)negative	(－)negative	(－)negative	(－)negative
1089943	Hepatocarcinoma	5.2	79.6	15	55.8	21.5	36	551	386	149	104	2.6	(+)7530	2.6	(+)10.81	(+)0.228	(+)0.008	(－)negative	(－)negative	(－)negative	(－)negative
1102789	Hepatocarcinoma	20.5	73.6	5.1	52.4	19.8	196	702	501	189	48	2.6	(+)5656	<2.0	(+)6.03	(-)1.23	(+)0.009	(－)negative	(－)negative	(－)negative	(－)negative
1104638	Hepatocarcinoma	17.7	73.7	8.1	51.4	19.8						2.6	(-)0.478	294.3	(-)0.101	(+)0.727	(+)0.009	(－)negative	(－)negative	(－)negative	(－)negative
883920	Hepatocarcinoma	15	64	21	45	18						2.5	(-)0.395	14.3	(-)0.086	(-)1.29	(+)0.004	(－)negative	(－)negative	(－)negative	(－)negative
1041966	Hepatocarcinoma	9.4	70.8	17.9	46.7	18.5	132	991	654	259	251	2.5	(-)0.429	85.5	(-)0.094	(-)1.48	(+)0.992	(－)negative	(－)negative	(－)negative	(－)negative
629885	Hepatocarcinoma	11.3	66	21.7	46.1	19.2						2.4	(+)6634	<2.0	(-)0.123	(+)0.002	(+)0.008	(－)negative	(－)negative	(－)negative	(－)negative
961555	Hepatocarcinoma	4.3	82.8	12.5	57.8	24.3	47	911	636	267	138	2.4	(+)3495	<2.0	(-)0.085	(+)0.002	(+)0.008	(－)negative	(－)negative	(－)negative	(－)negative
1061705	Hepatocarcinoma	18.8	68.5	10.9	46.6	19.8	451	1644	1118	475	262	2.4	(+)7518	<2.0	(-)0.090	(+)0.174	(+)0.009	(－)negative	(－)negative	(+)positive	(－)negative
1073494	Hepatocarcinoma	18.8	54.2	25.5	37.7	16	263	759	528	224	357	2.4	(+)123.3	8.9	(-)0.120	(+)0.003	(+)0.010	(－)negative	(－)negative	(－)negative	(－)negative
1092397	Hepatocarcinoma	6.5	79.3	13.1	54.8	22.4	71	862	595	243	142	2.4	(+)1.85	13.4	(-)0.126	(+)0.756	(+)0.008	(－)negative	(－)negative	(－)negative	(－)negative
1088861	Intrahepatic cholangpcarcinoma	12.3	75.4	10.6	55.1	19.1	134	819	598	207	116	2.9	N/A	N/A	N/A	N/A	N/A	(－)negative	(－)negative	(－)negative	(－)negative
1097675	Hepatocarcinoma	18.5	74.6	5.8	51.4	21.6	383	1548	1068	448	121	2.4	(+)7386	<2.0	(-)0.090	(+)0.020	(+)0.009	(－)negative	(－)negative	(－)negative	(－)negative
1104647	Hepatocarcinoma	18.4	69.7	11.6	47.2	19.9	221	841	570	240	140	2.4	(+)6561	6	(-)0.755	(+)0.707	(+)0.009	(－)negative	(－)negative	(+)positive	(－)negative
1110067	Hepatocarcinoma	12.3	75.3	11.2	50.3	21.3	267	1635	1092	463	244	2.4	(+)6992	<2.0	(-)0.113	(+)0.003	(+)0.010	(－)negative	(－)negative	(－)negative	(－)negative
882471	Intrahepatic cholangpcarcinoma	8	63	26	44	16						2.8	(-)0.432	100	(-)0.084	(+)0.881	(+)0.004	(－)negative	(－)negative	(+)positive	(－)negative
878807	Hepatocarcinoma	23	65	7	42	18						2.3	(+)5874	<2.0	(-)0.083	(+)0.004	(+)0.004	(－)negative	(－)negative	(－)negative	(－)negative
932921	Intrahepatic cholangpcarcinoma	9	51	38	37	13	135	765	555	195	570	2.8	(-)0.475	166.5	(-)0.087	(-)1.10	(+)0.008	(－)negative	(－)negative	(－)negative	(－)negative
1058229	Hepatocarcinoma	14.9	77.7	6.5	46.7	20.1	253	1321	794	342	111	2.3	(-)0.365	12.5	(-)0.092	(+)0.004	(+)0.008	(－)negative	(－)negative	(+)positive	(－)negative
1058627	Hepatocarcinoma	29.4	55.7	13.4	37.5	16.4	941	1782	1200	525	429	2.3	(+)6855	<2.0	(-)0.095	(+)0.054	(+)0.008	(－)negative	(－)negative	(+)positive	(－)negative
1064136	Hepatocarcinoma	19.3	71.8	7.9	50.1	21.9	367	1364	952	416	150	2.3	(+)5245	<2.0	(-)0.122	(+)0.104	(+)0.008	(－)negative	(－)negative	(－)negative	(－)negative
1092489	Hepatocarcinoma	16.4	78	3.6	49.8	21.7	219	1043	666	291	48	2.3	(+)8476	<2.0	(+)1.53	(+)0.876	(+)0.008	(－)negative	(－)negative	(－)negative	(－)negative
1094602	Hepatocarcinoma	16.9	79.4	3.1	53.7	23	521	2440	1650	706	96	2.3	(+)6141	<2.0	(-)0.091	(+)0.086	(+)0.008	(－)negative	(－)negative	(－)negative	(－)negative
1099291	Hepatocarcinoma	5.3	69.7	24.3	45.4	20	93	1235	805	354	430	2.3	(+)26.25	<2.0	(-)0.096	(+)0.301	(+)0.009	(－)negative	(－)negative	(－)negative	(－)negative
1040864	Intrahepatic cholangpcarcinoma	25.9	60	10.6	41.6	15.1	285	660	458	166	117	2.8	(-)0.440	3.7	(-)0.093	(-)1.70	(-)1.46	(－)negative	(－)negative	(－)negative	(－)negative
707399	Hepatocarcinoma	15.4	72.7	10.2	47.4	22	108	509	332	154	71	2.2	(+)2088	<2.0	(-)0.100	(+)0.003	(+)0.009	(－)negative	(－)negative	(－)negative	(－)negative
1047646	Hepatocarcinoma	23.1	46.5	28.2	30.7	14	277	558	368	168	338	2.2	(-)0.324	28.1	(-)0.094	(-)1.54	(+)0.143	(－)negative	(－)negative	(－)negative	(－)negative
1073218	Hepatocarcinoma	18.1	77.1	3.7	48.7	21.8	398	1696	1071	480	81	2.2	(+)6111	8.7	(+)1.46	(-)1.08	(+)0.009	(－)negative	(－)negative	(－)negative	(－)negative
1081138	Hepatocarcinoma	15.5	62.5	21.4	40.5	18.5						2.2	(+)5824	204.7	(+)1.56	(+)0.142	(+)0.011	(－)negative	(－)negative	(－)negative	(－)negative
1090744	Intrahepatic cholangpcarcinoma	15.1	65.5	18.3	45.6	16.3	311	1348	938	335	377	2.8	(-)0.812	372.1	(+)6.06	(-)1.25	(+)0.008	(－)negative	(－)negative	(－)negative	(－)negative
1090053	Hepatocarcinoma	19.4	68.3	11.7	45.9	20.5	206	725	488	218	125	2.2	(+)8.14	<2.0	(-)0.116	(-)1.02	(+)0.008	(－)negative	(－)negative	(－)negative	(－)negative
1074911	Intrahepatic cholangpcarcinoma	9.3	61.8	27.1	44.5	16.6						2.7	(-)0.437	<2.0	(-)0.113	(-)1.51	(-)1.85	(－)negative	(－)negative	(－)negative	(－)negative
1096124	Hepatocarcinoma	13.4	66.5	19.1	45.7	20.8	333	1652	1134	516	475	2.2	(+)6282	<2.0	(-)0.079	(+)0.003	(+)0.009	(－)negative	(－)negative	(－)negative	(－)negative
1096902	Hepatocarcinoma	8.8	62.1	27.5	42.5	18.9	58	409	280	125	181	2.2	(-)0.454	31.3	(-)0.109	(-)1.15	(+)0.015	(－)negative	(－)negative	(－)negative	(－)negative
1098522	Hepatocarcinoma	16.7	79.9	3.3	54	24.3	138	660	446	201	27	2.2	(+)3694	<2.0	(-)0.123	(+)0.004	(+)0.009	(－)negative	(－)negative	(－)negative	(－)negative
1099821	Hepatocarcinoma	6.7	79.8	12.3	54.1	24.5	130	1551	1052	476	239	2.2	(+)476.7	10.9	(-)0.115	(+)0.002	(+)0.008	(－)negative	(－)negative	(－)negative	(－)negative
1104950	Hepatocarcinoma	11.8	76.8	10.6	50.2	23.3	206	1335	872	405	184	2.2	(+)3764	<2.0	(-)0.104	(+)0.098	(+)0.010	(－)negative	(－)negative	(－)negative	(－)negative
878564	Hepatocarcinoma	23	68	7	44	21						2.1	(+)7053	<2.0	(-)0.080	(+)0.003	(+)0.004	(－)negative	(－)negative	(－)negative	(－)negative
1026390	Hepatocarcinoma	10.9	79.1	9.7	50.9	23.7	131	949	611	284	116	2.1	(+)6897	<2.0	(+)28.64	(-)1.45	(+)0.007	(－)negative	(－)negative	(－)negative	(－)negative
1061852	Hepatocarcinoma	9.8	84.9	4	51.6	25	147	1274	774	375	60	2.1	(+)5290	<2.0	(-)0.085	(+)0.003	(+)0.009	(－)negative	(－)negative	(－)negative	(－)negative
1063273	Hepatocarcinoma	17.2	65.4	15.4	44	21.2	172	654	440	212	154	2.1	(-)0.562	<2.0	(-)0.120	(-)1.28	(+)0.008	(－)negative	(－)negative	(－)negative	(－)negative
1077745	Hepatocarcinoma	16.3	67.6	15.5	39.8	18.9	277	1149	677	321	264	2.1	(+)5546	<2.0	(+)13.35	(-)1.42	(+)0.010	(－)negative	(－)negative	(－)negative	(－)negative
1089673	Hepatocarcinoma	13.6	73.4	12.2	47.6	22.4						2.1	(-)0.392	<2.0	(-)0.128	(+)0.767	(+)0.008	(－)negative	(－)negative	(－)negative	(－)negative
1090127	Hepatocarcinoma	12.4	73.8	12.9	40.8	19.7						2.1	(+)5761	<2.0	(-)0.100	(+)0.532	(+)0.007	(－)negative	(－)negative	(－)negative	(－)negative
1096964	Hepatocarcinoma	13.6	72.7	12.9	47.8	22.8	182	969	637	304	172	2.1	(+)474.2	32.5	(-)0.112	(+)0.002	(+)0.008	(－)negative	(－)negative	(－)negative	(－)negative
1099030	Hepatocarcinoma	11.8	78.7	8.3	49.3	23.4						2.1	(+)2150	<2.0	(-)0.114	(+)0.002	(+)0.008	(－)negative	(－)negative	(－)negative	(－)negative
1101410	Intrahepatic cholangpcarcinoma	15.3	76.3	7	52.8	19.9	260	1297	897	338	120	2.7	(-)0.410	75.2	(-)0.104	(-)1.72	(-)1.27	(－)negative	(－)negative	(－)negative	(－)negative
1103483	Hepatocarcinoma	18.5	67.7	13.3	43.6	21	199	727	468	226	143	2.1	(+)7134	<2.0	(-)0.104	(+)0.003	(+)0.009	(－)negative	(－)negative	(－)negative	(－)negative
1104085	Hepatocarcinoma	16.1	58.3	22.9	36.5	17.2	308	1112	697	328	438	2.1	(+)20.28	<2.0	(-)0.098	(+)0.340	(+)0.009	(－)negative	(－)negative	(－)negative	(－)negative
1094375	Intrahepatic cholangpcarcinoma	10.3	65.4	23.8	46.1	18.2	123	776	547	216	283	2.5	(-)0.250	<2.0	(-)0.093	(-)1.56	(-)1.35	(－)negative	(－)negative	(－)negative	(－)negative
1104206	Hepatocarcinoma	15.1	71.1	13.5	46.8	22.8	232	1092	720	351	207	2.1	(+)7527	<2.0	(+)1.20	(-)1.25	(+)0.009	(－)negative	(－)negative	(－)negative	(－)negative
1096083	Intrahepatic cholangpcarcinoma	11.6	65.6	21.2	46	18.8	174	987	692	284	319	2.4	(-)0.309	19.4	(-)0.105	(-)1.42	(+)0.045	(－)negative	(－)negative	(－)negative	(－)negative
1107656	Hepatocarcinoma	32.4	55.1	11.3	36.6	17.4						2.1	(+)5700	<2.0	(-)0.122	(+)0.008	(+)0.010	(－)negative	(－)negative	(+)positive	(－)negative
1108091	Hepatocarcinoma	19.5	69.3	8.8	44.2	20.8	124	439	280	132	56	2.1	(+)6714	<2.0	(-)0.647	(-)1.46	(+)0.009	(－)negative	(－)negative	(－)negative	(－)negative
1108108	Hepatocarcinoma	17.7	70.6	10.8	46.7	22.2	332	1323	875	417	202	2.1	(+)4709	12.1	(+)3.62	(-)1.43	(+)0.010	(－)negative	(－)negative	(－)negative	(－)negative
781333	Hepatocarcinoma	73	17	9	47	23						2	N/A	N/A	N/A	N/A	N/A	(－)negative	(－)negative	(－)negative	(－)negative
783870	Hepatocarcinoma	16	36	46	22	11						2	(+)7785	<2.0	(-)0.128	(+)0.084	(+)0.005	(－)negative	(－)negative	(－)negative	(－)negative
879749	Hepatocarcinoma	7	86	6	49	25						2	(+)4803	<2.0	(-)0.082	(+)0.161	(+)0.004	(－)negative	(－)negative	(－)negative	(－)negative
1036788	Hepatocarcinoma	7.8	81.1	10.2	48	24.4	86	892	528	268	112	2	(+)5851	<2.0	(-)0.084	(+)0.002	(+)0.008	(－)negative	(－)negative	(－)negative	(－)negative
1037203	Hepatocarcinoma	21.3	70.9	7.3	46.5	23.8	426	1418	930	476	146	2	(+)6457	<2.0	(-)0.093	(+)0.003	(+)0.009	(－)negative	(－)negative	(－)negative	(－)negative
1068341	Hepatocarcinoma	10.5	67.7	20.7	44.6	22.4	221	1422	937	470	435	2	(+)5797	<2.0	(-)0.081	(+)0.167	(+)0.009	(－)negative	(－)negative	(－)negative	(－)negative
1082559	Hepatocarcinoma	17.2	77.8	4	50.8	25.5						2	(+)1398	<2.0	(+)722.4	(-)3.26	(+)0.010	(－)negative	(－)negative	(－)negative	(－)negative
1090992	Hepatocarcinoma	7.8	83.5	7.8	53.6	27	63	671	430	217	63	2	(+)6312	<2.0	(-)0.111	(+)0.003	(+)0.008	(－)negative	(－)negative	(－)negative	(－)negative
1094172	Hepatocarcinoma	15.6	54.5	27.9	35.5	17.9	232	811	529	266	416	2	(+)276.0	110.1	(+)23.44	(-)1.34	(+)0.008	(－)negative	(－)negative	(－)negative	(－)negative
1094381	Hepatocarcinoma	18.7	51.7	27.3	31.4	15.5	178	493	300	148	260	2	(-)0.296	<2.0	(-)0.089	(+)0.003	(+)0.008	(－)negative	(－)negative	(+)positive	(－)negative
1099740	Hepatocarcinoma	11.9	76.3	10.9	49.4	25.2						2	(+)7115	<2.0	(-)0.358	(+)0.593	(+)0.008	(－)negative	(－)negative	(－)negative	(－)negative
1100928	Hepatocarcinoma	17.9	58.2	23.5	32.9	16.4	182	592	334	167	239	2	(+)7497	<2.0	(-)0.099	(+)0.003	(+)0.008	(－)negative	(－)negative	(+)positive	(－)negative
1102806	Hepatocarcinoma	7	80.2	9.8	53.1	26.2	101	1154	764	377	141	2	(+)4181	<2.0	(-)0.097	(+)0.003	(+)0.010	(－)negative	(－)negative	(－)negative	(－)negative
1103089	Hepatocarcinoma	8.7	49.6	40.3	31.6	16.2	139	791	503	258	641	2	(+)7720	<2.0	(-)0.110	(+)0.003	(+)0.009	(－)negative	(－)negative	(+)positive	(－)negative
1104237	Hepatocarcinoma	17.3	68.8	12.5	44.6	22.7	242	962	624	317	174	2	(+)6951	<2.0	(-)0.105	(+)0.003	(+)0.010	(－)negative	(－)negative	(－)negative	(－)negative
1107445	Hepatocarcinoma	11.3	68.5	19.3	46.5	23.4	177	1075	730	368	303	2	(+)6889	<2.0	(+)1.23	(-)1.60	(+)0.011	(－)negative	(－)negative	(－)negative	(－)negative
879834	Hepatocarcinoma	10	57	29	36	19						1.9	(-)0.269	<2.0	(-)0.083	(+)0.063	(+)0.004	(－)negative	(－)negative	(－)negative	(－)negative
1026313	Hepatocarcinoma	16.4	66.4	14.7	40.8	21.6	230	930	571	302	206	1.9	(+)5446	<2.0	(-)0.098	(+)0.002	(+)0.008	(－)negative	(－)negative	(+)positive	(－)negative
1031233	Hepatocarcinoma	9.6	54.9	34.8	35.3	18.7	173	988	635	337	626	1.9	(+)6159	<2.0	(+)1.18	(+)0.899	(+)0.008	(－)negative	(－)negative	(－)negative	(－)negative
1031737	Hepatocarcinoma	12.9	56.6	28.8	35.2	18.5	194	849	528	278	432	1.9	(+)4193	4.9	(-)0.091	(-)1.01	(+)0.008	(－)negative	(－)negative	(－)negative	(－)negative
1074232	Hepatocarcinoma	12.2	70.3	16.3	42	22.7						1.9	(+)705.9	<2.0	(-)0.786	(+)0.341	(+)0.010	(－)negative	(－)negative	(－)negative	(－)negative
1086876	Hepatocarcinoma	8.8	66.5	22.9	42.6	22.6						1.9	(+)486.8	<2.0	(-)0.110	(+)0.003	(+)0.007	(－)negative	(－)negative	(－)negative	(－)negative
1093865	Hepatocarcinoma	14.8	60.4	24.1	34.4	18	127	518	294	154	206	1.9	(-)0.319	<2.0	(-)0.084	(+)0.895	(+)0.008	(－)negative	(－)negative	(－)negative	(－)negative
1094906	Hepatocarcinoma	15.1	73.8	9.5	47.5	24.5	294	1434	923	477	184	1.9	(+)3471	17.3	(-)0.085	(+)0.108	(+)0.008	(－)negative	(－)negative	(+)positive	(－)negative
1095447	Hepatocarcinoma	13.2	62.4	22.9	39.8	20.5	281	1323	844	436	486	1.9	(+)6161	4.4	(-)0.524	(+)0.915	(+)0.008	(－)negative	(－)negative	(－)negative	(－)negative
1101136	Hepatocarcinoma	8.3	77.3	13.8	48.7	25.8	189	1753	1106	585	314	1.9	(+)6817	<2.0	(+)6.67	(-)1.08	(+)0.008	(－)negative	(－)negative	(－)negative	(－)negative
1218661	Intrahepatic cholangpcarcinoma	10.8	53.8	35.1	37.9	15.5						2.4	N/A	N/A	N/A	N/A	N/A	(-)negative	(-)negative	(-)negative	(-)negative
1101832	Hepatocarcinoma	27.3	62.1	10.2	38.2	20.4	399	907	557	298	148	1.9	(-)0.455	<2.0	(-)0.104	(-)1.57	(+)0.900	(－)negative	(－)negative	(+)positive	(－)negative
1104726	Hepatocarcinoma	10.5	60	28.7	37.5	20.1	155	881	551	295	422	1.9	(-)0.448	69.6	(-)0.105	(-)1.19	(+)0.009	(－)negative	(－)negative	(－)negative	(－)negative
1104767	Hepatocarcinoma	12.7	72.5	13.7	38.5	20.1	130	739	393	205	140	1.9	(+)7172	<2.0	(-)0.582	(+)0.704	(+)0.009	(－)negative	(－)negative	(－)negative	(－)negative
1105912	Hepatocarcinoma	7.5	46.9	43.7	29.5	15.5	88	550	346	182	513	1.9	(+)6316	<2.0	(+)34.44	(+)0.666	(+)0.009	(－)negative	(－)negative	(－)negative	(－)negative
782502	Hepatocarcinoma	4	57	38	36	20						1.8	(+)7249	<2.0	(-)0.103	(+)0.004	(+)0.005	(－)negative	(－)negative	(－)negative	(－)negative
992048	Hepatocarcinoma	13.2	65	21.2	41.2	23						1.8	(+)4801	<2.0	(-)0.659	(-)1.02	(+)0.006	(－)negative	(－)negative	(－)negative	(－)negative
1027758	Hepatocarcinoma	9.9	81.7	5.5	51.9	29.1	139	1144	727	407	77	1.8	(-)0.690	67.7	(-)0.097	(+)0.129	(+)0.007	(－)negative	(－)negative	(－)negative	(－)negative
1042856	Hepatocarcinoma	13.6	41	43.6	26.1	14.3	218	656	418	229	698	1.8	(+)797.7	<2.0	(-)0.086	(+)0.041	(+)0.007	(－)negative	(－)negative	(－)negative	(－)negative
1044620	Hepatocarcinoma	9.1	70.5	20	41.9	23.9	100	776	461	263	220	1.8	(-)0.386	<2.0	(-)0.081	(-)1.44	(+)0.011	(－)negative	(－)negative	(－)negative	(－)negative
1059655	Hepatocarcinoma	14.1	69.1	15.5	39.6	22.5	268	1313	752	428	295	1.8	(+)4064	<2.0	(-)0.096	(+)0.252	(+)0.008	(－)negative	(－)negative	(+)positive	(－)negative
1093409	Hepatocarcinoma	12.3	68.5	18.2	43	23.3						1.8	(-)0.365	<2.0	(-)0.087	(-)1.24	(+)0.008	(－)negative	(+)136.2	(－)negative	(－)negative
1095966	Hepatocarcinoma	7.6	46.2	43.4	19.5	10.7	189	1154	486	268	1084	1.8	(+)6054	<2.0	(-)0.085	(+)0.010	(+)0.008	(－)negative	(－)negative	(－)negative	(－)negative
1101452	Hepatocarcinoma	10.5	77.6	11	46.5	25.3	177	1305	782	426	186	1.8	(+)5270	<2.0	(+)42.79	(-)1.38	(+)0.008	(－)negative	(－)negative	(－)negative	(－)negative
1102275	Hepatocarcinoma	4.4	59	34.8	36.5	20.7	30	404	250	142	239	1.8	(+)6801	<2.0	(-)0.101	(+)0.003	(+)0.010	(－)negative	(－)negative	(－)negative	(－)negative
1102978	Hepatocarcinoma	11.2	62.7	24.5	38.8	21.7						1.8	(+)7844	<2.0	(-)0.102	(+)0.003	(+)0.009	(－)negative	(－)negative	(－)negative	(－)negative
1103316	Hepatocarcinoma	15.3	69.4	14.9	44	23.8	282	1282	814	440	275	1.8	(-)0.515	<2.0	(-)0.112	(-)1.71	(-)1.78	(－)negative	(－)negative	(－)negative	(－)negative
1106300	Hepatocarcinoma	20.6	55.8	23.3	34.1	19.4	295	798	488	277	334	1.8	(-)0.408	>1000.0	(-)0.106	(+)0.021	(+)0.010	(－)negative	(－)negative	(－)negative	(－)negative
1106736	Hepatocarcinoma	19.6	53.2	24.9	32.7	18.4	247	672	413	232	315	1.8	(+)7330	<2.0	(-)0.106	(+)0.003	(+)0.009	(－)negative	(－)negative	(－)negative	(－)negative
880424	Hepatocarcinoma	15	67	15	39	23						1.7	(+)3998	<2.0	(-)0.080	(+)0.004	(+)0.004	(－)negative	(－)negative	(－)negative	(－)negative
1037801	Hepatocarcinoma	19.3	73.3	6.5	46.1	26.7	290	1100	692	401	98	1.7	(+)6345	143.7	(-)0.089	(+)0.002	(+)0.008	(－)negative	(－)negative	(－)negative	(－)negative
1043411	Hepatocarcinoma	25.9	63.6	8.6	38.5	22.7						1.7	(+)6671	<2.0	(-)0.110	(+)0.308	(+)0.008	(－)negative	(－)negative	(－)negative	(－)negative
1045426	Hepatocarcinoma	16.2	70.3	12.3	41.2	24.6	194	844	494	295	148	1.7	(+)1479	<2.0	(-)0.866	(-)1.30	(+)0.007	(－)negative	(－)negative	(－)negative	(－)negative
1046844	Hepatocarcinoma	16.6	77.2	4.7	44.6	26.3	365	1698	981	579	103	1.7	(+)36.40	<2.0	(-)0.092	(+)0.002	(+)0.007	(－)negative	(－)negative	(－)negative	(－)negative
1095367	Intrahepatic cholangpcarcinoma	15.1	68.6	15.7	45.8	20.1						2.3	(-)0.336	5.2	(-)0.114	(+)0.003	(+)0.008	(－)negative	(－)negative	(－)negative	(－)negative
1050840	Hepatocarcinoma	23.9	66.3	8.8	40.4	23.7	287	796	485	284	106	1.7	(+)508.9	18.7	(-)0.089	(+)0.003	(+)0.008	(－)negative	(－)negative	(+)positive	(+)positive
1052156	Hepatocarcinoma	11.4	80	7.8	48.1	27.7	137	960	577	332	94	1.7	(+)2090	<2.0	(-)0.098	(+)0.002	(+)0.008	(－)negative	(－)negative	(－)negative	(－)negative
1069529	Hepatocarcinoma	15.9	69.6	13.9	42.9	25.3	302	1322	815	481	264	1.7	(+)5956	<2.0	(+)4.68	(+)0.882	(+)0.009	(－)negative	(－)negative	(－)negative	(－)negative
948427	Intrahepatic cholangpcarcinoma	7.2	83.9	8.5	55.5	27.1	144	1678	1110	542	170	2	(-)0.386	161.3	(-)0.095	(-)1.24	(+)0.012	(－)negative	(－)negative	(－)negative	(+)positive
1074072	Hepatocarcinoma	9.8	70.8	18.5	42.9	25.8	216	1558	944	568	407	1.7	(+)6194	33.3	(-)0.119	(+)0.230	(+)0.010	(－)negative	(－)negative	(－)negative	(－)negative
1090011	Hepatocarcinoma	14.4	72.9	12	44.9	26	150	760	468	271	125	1.7	(+)5647	<2.0	(-)0.123	(+)0.003	(+)0.008	(－)negative	(－)negative	(－)negative	(－)negative
1090321	Hepatocarcinoma	7.8	78	13.6	49.4	28.5	126	1263	799	462	220	1.7	(+)7323	<2.0	(-)0.120	(+)0.015	(+)0.008	(－)negative	(－)negative	(－)negative	(－)negative
1091492	Hepatocarcinoma	7.7	75.1	16	44.8	26.4	106	1034	616	363	220	1.7	(-)0.369	<2.0	(-)0.112	(+)0.040	(+)0.009	(－)negative	(－)negative	(－)negative	(－)negative
1095379	Hepatocarcinoma	17.8	73.8	6.7	44.1	25.3	248	1026	612	352	93	1.7	(+)6030	<2.0	(-)0.106	(+)0.002	(+)0.009	(－)negative	(－)negative	(－)negative	(－)negative
622145	Hepatocarcinoma	6	81	12	45	29						1.6	(+)4266	<2.00	(－)0.087	(+)0.003	(+)0.004	(－)negative	(－)negative	(－)negative	(－)negative
748611	Hepatocarcinoma	15.7	63.3	20.7	36.7	22.5	283	1139	661	405	373	1.6	(+)9344	<2.0	(-)0.103	(+)0.071	(+)0.005	(－)negative	(－)negative	(－)negative	(－)negative
921009	Hepatocarcinoma	26	65	8	37	23	338	845	481	299	104	1.6	(+)98.84	36.6	(+)352.7	(-)2.45	(+)0.008	(－)negative	(－)negative	(－)negative	(－)negative
947035	Hepatocarcinoma	13	79	5	46	29	234	1422	828	522	90	1.6	(+)5308	<2.0	(-)0.074	(+)0.005	(+)0.008	(－)negative	(－)negative	(－)negative	(－)negative
1027472	Hepatocarcinoma	21.1	68.9	9.6	41	26.3	317	1034	615	395	144	1.6	(+)2555	<2.0	(-)0.092	(+)0.002	(+)0.007	(－)negative	(－)negative	(+)positive	(－)negative
1040508	Hepatocarcinoma	10.7	79.4	9.4	44.9	28.5	161	1191	674	428	141	1.6	(+)6577	6.8	(-)0.086	(+)0.002	(+)0.006	(－)negative	(－)negative	(－)negative	(－)negative
1047655	Hepatocarcinoma	19.2	68.6	9.9	38.1	23.9	269	960	533	335	139	1.6	(+)6682	<2.0	(-)0.084	(+)0.002	(+)0.006	(－)negative	(－)negative	(－)negative	(－)negative
1064042	Hepatocarcinoma	12.8	73.3	13	46	28.7	90	513	322	201	91	1.6	(+)6225	<2.0	(+)22.63	(-)1.05	(+)0.008	(－)negative	(－)negative	(－)negative	(－)negative
1073249	Hepatocarcinoma	13.1	78.1	7.7	46	28.3	236	1406	828	509	139	1.6	(+)5580	<2.0	(-)0.366	(+)0.871	(+)0.010	(－)negative	(－)negative	(－)negative	(－)negative
1053238	Intrahepatic cholangpcarcinoma	7.4	74.6	17.3	47.2	24.2	111	1119	708	363	260	2	(+)878.1	<2.0	(-)0.095	(+)0.003	(+)0.008	(－)negative	(－)negative	(+)positive	(－)negative
1092695	Hepatocarcinoma	12.6	65.2	20.8	38.1	24.4	91	473	276	177	151	1.6	(+)1300	32.4	(-)0.123	(+)0.003	(+)0.008	(－)negative	(－)negative	(－)negative	(－)negative
1095627	Hepatocarcinoma	17.3	65.5	15.2	38.4	24.5	168	636	373	238	148	1.6	(+)6816	<2.0	(-)0.088	(+)0.003	(+)0.008	(－)negative	(－)negative	(－)negative	(－)negative
1095999	Hepatocarcinoma	11.7	66.3	21.7	40.8	25	145	827	508	311	270	1.6	(+)15.21	<2.0	(-)0.088	(+)0.003	(+)0.008	(－)negative	(－)negative	(+)positive	(－)negative
1097153	Hepatocarcinoma	10.1	63.7	25.3	37.6	23.5						1.6	(+)1728	8.7	(-)0.124	(+)0.003	(+)0.008	(－)negative	(－)negative	(－)negative	(－)negative
1098016	Hepatocarcinoma	6.7	41.3	51.5	24	15.3	119	736	427	273	916	1.6	(+)6403	<2.0	(-)0.120	(+)0.002	(+)0.009	(－)negative	(－)negative	(－)negative	(－)negative
1102749	Hepatic hemangiomas	11.5	67.9	19.7	45	15.9	274	1613	1068	377	469	2.8	(-)0.496	101.5	(-)0.110	(-)1.08	(+)0.009	(－)negative	(－)negative	(－)negative	(－)negative
1099738	Hepatocarcinoma	8.8	85.7	3.4	49.9	32.1	113	1102	641	413	44	1.6	(+)6980	<2.0	(-)0.122	(+)0.002	(+)0.008	(－)negative	(－)negative	(+)positive	(－)negative
1100931	Hepatocarcinoma	8.7	75.7	13.9	41.1	26.2	106	923	501	320	169	1.6	(+)3350	<2.0	(-)0.107	(+)0.003	(+)0.009	(－)negative	(－)negative	(+)positive	(－)negative
1102403	Hepatocarcinoma	28.4	56	15	32.1	19.6	616	1215	695	425	325	1.6	(+)6860	<2.0	(-)0.097	(+)0.003	(+)0.010	(－)negative	(－)negative	(－)negative	(－)negative
1103011	Hepatocarcinoma	15.6	61.2	22.6	37.1	23.1	137	539	326	203	199	1.6	(+)7258	<2.0	(+)16.01	(-)1.20	(+)0.009	(－)negative	(－)negative	(－)negative	(－)negative
1064247	Intrahepatic cholangpcarcinoma	7.6	71.8	19.8	43.4	22.2	91	862	521	266	238	2	N/A	N/A	N/A	N/A	N/A	(-)negative	(-)negative	(-)negative	(-)negative
1103632	Hepatocarcinoma	29.8	62.6	7.2	37.2	24						1.6	(+)110.1	446.3	(+)8.94	(+)0.988	(+)0.009	(－)negative	(－)negative	(+)positive	(－)negative
1104733	Hepatocarcinoma	14.7	75	9.7	45.5	27.6						1.6	(+)5213	<2.0	(-)0.212	(+)0.062	(+)0.009	(－)negative	(－)negative	(－)negative	(－)negative
1104753	Hepatocarcinoma	10.4	76.5	12.7	41.7	26.3						1.6	(+)7596	<2.0	(+)24.74	(-)1.35	(+)0.009	(－)negative	(－)negative	(－)negative	(－)negative
1104809	Hepatocarcinoma	8.7	66.3	24.6	40.2	25.1	94	719	436	272	266	1.6	(+)6713	<2.0	(+)5.49	(-)1.24	(+)0.009	(－)negative	(－)negative	(－)negative	(－)negative
1107243	Hepatocarcinoma	7.7	77.5	14.4	37.2	23	85	858	412	255	160	1.6	(+)6892	<2.0	(+)7.05	(-)1.53	(+)0.009	(－)negative	(－)negative	(－)negative	(－)negative
1107796	Hepatocarcinoma	9.2	82.2	7.7	47.6	30	52	467	270	170	44	1.6	(+)1655	<2.0	(-)0.878	(-)1.67	(+)0.011	(－)negative	(－)negative	(－)negative	(－)negative
781425	Hepatocarcinoma	13	68	17	40	26						1.5	(+)8165	<2.0	(+)2.47	(+)0.946	(+)0.007	(-)negative	(-)negative	(-)negative	(-)negative
783058	Hepatocarcinoma	13	82	3	45	30						1.5	(+)7524	<2.0	(-)0.117	(+)0.004	(+)0.004	(－)negative	(－)negative	(－)negative	(－)negative
858386	Hepatocarcinoma	5	83	11	49	32						1.5	(+)6720	<2.0	(-)0.073	(+)0.368	(+)0.005	(－)negative	(－)negative	(－)negative	(－)negative
884096	Hepatocarcinoma	16	71	12	41	28						1.5	(-)0.375	<2.0	(-)0.081	(-)1.57	(-)1.85	(－)negative	(－)negative	(－)negative	(－)negative
1086103	Intrahepatic cholangpcarcinoma	10.6	70.3	18	45.1	22.9	205	1361	873	444	348	2	(+)5769	<2.0	(-)0.110	(+)0.003	(+)0.011	(－)negative	(－)negative	(－)negative	(－)negative
1090802	Hepatic hemangiomas	13.3	65.1	20.8	45.3	17.1	194	950	661	249	303	2.6	(-)0.382	157.6	(-)0.112	(+)0.918	(+)0.012	(－)negative	(－)negative	(－)negative	(－)negative
574240	Hepatic hemangiomas	13.5	66.4	18.1	44.6	18.1	184	903	606	246	247	2.5	(-)0.367	<2.0	(-)0.123	(-)1.59	(-)1.97	(－)negative	(－)negative	(－)negative	(－)negative
1104179	Hepatic hemangiomas	12	74.4	13	48.6	20.5	138	853	556	234	148	2.4	(+)6586	<2.0	(-)0.111	(-)1.26	(+)0.009	(－)negative	(－)negative	(+)positive	(－)negative
1028097	Hepatocarcinoma	28	63.5	8	37.1	24.6	196	445	260	172	56	1.5	(+)4800	<2.0	(+)1.05	(-)1.12	(+)0.007	(－)negative	(－)negative	(－)negative	(－)negative
1032808	Hepatocarcinoma	8.1	67.3	23.6	39.3	26.6	162	1346	786	532	472	1.5	(+)5350	<2.0	(-)0.092	(+)0.002	(+)0.009	(－)negative	(－)negative	(－)negative	(－)negative
1049838	Hepatocarcinoma	15.9	72.4	11.3	43.7	28.3	366	1665	1005	651	260	1.5	(-)0.319	<2.0	(-)0.093	(-)1.50	(-)1.57	(－)negative	(－)negative	(－)negative	(－)negative
1065239	Hepatocarcinoma	10.1	72.7	16.4	40.9	27.5	232	1672	941	633	377	1.5	(+)5736	<2.0	(-)0.094	(+)0.035	(+)0.008	(－)negative	(－)negative	(－)negative	(－)negative
1079405	Hepatocarcinoma	8.4	80.1	9.8	41.4	27.4	173	1653	854	565	202	1.5	(+)6862	<2.0	(+)116.0	(-)1.35	(+)0.009	(－)negative	(－)negative	(－)negative	(－)negative
1079935	Hepatocarcinoma	27.8	47.9	23.6	27.9	18.3	397	685	399	262	337	1.5	(+)264.4	<2.0	(-)0.107	(+)0.003	(+)0.010	(－)negative	(－)negative	(－)negative	(－)negative
1084204	Hepatocarcinoma	10.1	63.9	25.5	36.4	23.5	140	885	504	325	353	1.5	(+)3083	<2.0	(+)16.08	(-)1.02	(+)0.011	(－)negative	(－)negative	(－)negative	(－)negative
1043607	Intrahepatic cholangpcarcinoma	6.5	51.4	41.7	33.3	17.6	78	617	400	211	500	1.9	(-)0.551	<2.0	(-)0.093	(-)1.64	(-)2.03	(－)negative	(－)negative	(－)negative	(－)negative
1089654	Hepatocarcinoma	10.9	41.5	46.4	24.7	16.4	179	685	408	271	767	1.5	(+)6176	26.7	(-)0.130	(+)0.003	(+)0.008	(－)negative	(－)negative	(－)negative	(－)negative
1052678	Intrahepatic cholangpcarcinoma	7.1	70.8	20.2	43.3	22.8	85	850	520	274	242	1.9	(+)6899	<2.0	(+)15.45	(-)1.12	(+)0.008	(－)negative	(－)negative	(－)negative	(－)negative
1092380	Hepatic hemangiomas	7.9	71.5	19.2	48.3	20.6	179	1610	1087	465	433	2.3	(-)0.545	869.6	(-)0.111	(-)1.64	(-)1.79	(－)negative	(－)negative	(－)negative	(－)negative
1092405	Hepatocarcinoma	23.4	60.8	14.2	35.3	23.3	171	445	258	171	104	1.5	(+)5531	32.4	(+)61.25	(-)1.23	(+)0.008	(－)negative	(－)negative	(－)negative	(－)negative
1094205	Hepatic hemangiomas	13.1	72.1	12.9	49.7	22						2.3	(-)0.354	<2.0	(-)0.106	(-)1.46	(-)1.70	(－)negative	(－)negative	(－)negative	(－)negative
1100948	Hepatic hemangiomas	11.1	76.8	11.4	50.9	22.4	158	1095	726	319	162	2.3	(-)0.478	<2.0	(-)0.081	(-)1.64	(-)1.57	(－)negative	(－)negative	(－)negative	(－)negative
1095316	Hepatocarcinoma	19.7	65.4	14.1	37.8	25.9	368	1224	706	484	264	1.5	(+)3232	4.2	(+)16.00	(+)0.537	(+)0.009	(－)negative	(－)negative	(－)negative	(－)negative
1097380	Hepatocarcinoma	16.1	61.5	20.2	34.3	23.6						1.5	(+)7379	<2.0	(-)0.118	(+)0.002	(+)0.009	(－)negative	(－)negative	(－)negative	(－)negative
1100916	Hepatocarcinoma	10.8	80.4	6.8	46.3	30.2	152	1128	649	424	95	1.5	(+)6909	<2.0	(-)0.106	(+)0.003	(+)0.009	(－)negative	(－)negative	(－)negative	(－)negative
1110200	Hepatic hemangiomas	13.5	75	10	49.3	21.5	251	1392	915	400	185	2.3	(-)0.477	<2.0	(-)0.103	(-)2.19	(-)2.20	(－)negative	(－)negative	(－)negative	(－)negative
1105489	Hepatocarcinoma	6.4	84.7	8.5	31.7	21.3	161	2123	796	534	213	1.5	(+)3965	<2.0	(-)0.104	(+)0.003	(+)0.009	(－)negative	(－)negative	(－)negative	(－)negative
783924	Intrahepatic cholangpcarcinoma	6	63	29	40	22						1.8	(-)0.453	<2.0	(-)0.128	(-)1.31	(+)0.005	(－)negative	(－)negative	(－)negative	(－)negative
1096014	Hepatic hemangiomas	15	63.9	20.1	41.7	18.6	228	968	632	281	304	2.2	(-)0.318	<2.0	(-)0.124	(-)1.52	(-)1.85	(－)negative	(－)negative	(－)negative	(－)negative
1106580	Hepatocarcinoma	11.8	73.8	13.3	43	28.3	74	460	268	176	83	1.5	(+)7387	28.4	(-)0.106	(+)0.003	(+)0.009	(－)negative	(－)negative	(－)negative	(－)negative
1094647	Hepatic hemangiomas	19.2	75	5.1	49.3	23.2	184	718	473	222	49	2.1	(-)0.344	13.9	(-)0.090	(-)1.02	(+)0.008	(－)negative	(－)negative	(－)negative	(－)negative
1104421	Hepatic hemangiomas	17.5	77.8	3.8	50	23.9	158	706	454	217	35	2.1	(+)5640	110.9	(+)5.26	(-)1.15	(+)0.010	(－)negative	(－)negative	(－)negative	(－)negative
807214	Hepatocarcinoma	14	77	7	43	31						1.4	(+)8306	<2.0	(-)0.084	(+)0.005	(+)0.005	(－)negative	(－)negative	(－)negative	(－)negative
831496	Hepatocarcinoma	7	86	5	47	34						1.4	(+)3635	<2.0	(-)0.095	(+)0.004	(+)0.005	(－)negative	(－)negative	(－)negative	(－)negative
879965	Hepatocarcinoma	13	74	10	42	29						1.4	(+)3651	16.6	(+)18.07	(-)1.02	(+)0.004	(－)negative	(－)negative	(－)negative	(－)negative
1029086	Hepatocarcinoma	14.9	74.2	10	40.1	29.5	165	818	442	325	110	1.4	(+)5492	<2.0	(-)0.466	(-)1.15	(+)0.010	(－)negative	(－)negative	(+)positive	(－)negative
1034285	Hepatocarcinoma	20.4	73.8	5.1	38.5	28.3	265	959	501	368	66	1.4	(+)6306	<2.0	(-)0.097	(+)0.384	(+)0.009	(－)negative	(－)negative	(－)negative	(－)negative
1047979	Hepatocarcinoma	12.4	56.3	30.8	27.3	19.1	248	1126	546	382	616	1.4	(+)4032	<2.0	(-)0.083	(+)0.002	(+)0.007	(－)negative	(－)negative	(－)negative	(－)negative
1050884	Hepatocarcinoma	26.3	59.4	13.1	34.2	23.8	552	1247	718	500	275	1.4	(+)5510	<2.0	(-)0.091	(+)0.002	(+)0.008	(－)negative	(－)negative	(－)negative	(－)negative
1053827	Hepatocarcinoma	12	62.3	24.6	34.3	25.3	144	748	412	304	295	1.4	(+)7005	<2.0	(-)0.095	(+)0.097	(+)0.008	(－)negative	(－)negative	(+)positive	(－)negative
1056864	Hepatocarcinoma	8.4	79.9	10.9	44.1	31.8	160	1518	838	604	207	1.4	(+)6027	<2.0	(-)0.086	(+)0.200	(+)0.008	(－)negative	(－)negative	(－)negative	(－)negative
1059011	Hepatocarcinoma	13.3	72.1	13.6	41.9	28.9	160	865	503	347	163	1.4	(+)2292	<2.0	(-)0.095	(+)0.064	(+)0.009	(－)negative	(－)negative	(－)negative	(－)negative
1063432	Hepatocarcinoma	14.7	64.8	19.4	30.9	22.2						1.4	(+)7329	31	(+)4.39	(+)0.270	(+)0.009	(－)negative	(－)negative	(－)negative	(－)negative
481201	Hepatic cyst	10.7	72.7	15.4	47.5	23.3	74	504	329	161	107	2	(-)0.368	<2.0	(-)0.123	(-)1.53	(+)0.588	(－)negative	(－)negative	(－)negative	(－)negative
1073322	Hepatocarcinoma	8.9	60.9	29.3	32.8	24.1	249	1705	918	675	820	1.4	(+)6064	<2.0	(-)0.425	(+)0.795	(+)0.009	(－)negative	(－)negative	(－)negative	(－)negative
1093911	Hepatic hemangiomas	16.6	78.7	4.2	50.4	25.2						2	(-)0.293	2.2	(-)0.092	(+)0.596	(+)0.008	(－)negative	(－)negative	(－)negative	(－)negative
867619	Intrahepatic cholangpcarcinoma	7	78	13	46	26						1.8	(+)94.59	<2.0	(-)0.092	(+)0.003	(+)0.004	(－)negative	(－)negative	(－)negative	(－)negative
1085459	Hepatocarcinoma	7.6	73.7	17.5	42	31.1	134	1290	735	545	306	1.4	(+)4937	<2.0	(-)0.116	(+)0.029	(+)0.007	(－)negative	(－)negative	(－)negative	(－)negative
1094449	Hepatic hemangiomas	11	79.6	7.8	52	25.4	131	947	619	303	93	2	(-)0.258	4.1	(-)0.095	(-)1.25	(+)0.008	(－)negative	(－)negative	(+)positive	(－)negative
1094925	Hepatic hemangiomas	15.1	77.1	6.4	47	24.1	340	1734	1058	543	143	2	(-)0.374	524	(-)0.113	(+)0.289	(+)0.009	(－)negative	(－)negative	(－)negative	(－)negative
1086639	Hepatocarcinoma	13	81.3	5.2	45.7	33.7	186	1166	656	484	75	1.4	(+)5203	<2.0	(+)7.03	(-)1.43	(+)0.437	(－)negative	(－)negative	(－)negative	(－)negative
884434	Intrahepatic cholangpcarcinoma	14	70	15	44	25						1.8	(-)0.416	439.6	(-)0.077	(+)0.791	(+)0.004	(－)negative	(－)negative	(－)negative	(－)negative
1097220	Hepatic hemangiomas	14.5	64	20.5	38.9	19.4	210	928	564	282	297	2	(+)5014	<2.0	(-)0.114	(+)0.002	(+)0.008	(－)negative	(－)negative	(－)negative	(－)negative
1095628	Hepatic cyst	9.7	81.8	6.1	53.5	27.5	185	1556	1017	524	116	1.9	(-)0.321	<2.0	(-)0.091	(-)1.47	(-)1.97	10.9	0.94	0.94	17.9
1103012	Hepatic cyst	8.9	73.9	16.8	46	24.1	163	1364	849	445	310	1.9	(-)0.504	<2.0	(-)0.103	(-)1.79	(-)1.94	(－)negative	(－)negative	(+)positive	(－)negative
1091670	Hepatocarcinoma	13.1	75.8	10.1	42.3	29.5	97	564	315	219	75	1.4	(-)0.560	26.4	(-)0.133	(+)0.610	(+)0.009	(－)negative	(－)negative	(－)negative	(－)negative
1090817	Hepatic cyst	8	70.6	20.2	43.6	24.8	101	892	551	314	255	1.8	(-)0.350	11.4	(-)0.115	(-)1.34	(+)0.010	(－)negative	(－)negative	(－)negative	(－)negative
1091845	Hepatocarcinoma	10.1	64.1	24.9	36.9	26.3						1.4	(+)6064	21.5	(-)0.107	(+)0.002	(+)0.008	(－)negative	(－)negative	(+)positive	(－)negative
1101625	Hepatic cyst	10.7	74	14.8	46.6	25.4						1.8	(-)0.467	<2.0	(-)0.098	(-)2.07	(-)1.95	(－)negative	(－)negative	(－)negative	(－)negative
1078842	Intrahepatic cholangpcarcinoma	7.7	77.3	13.7	44.3	24	86	864	495	268	153	1.8	N/A	N/A	N/A	N/A	N/A	(-)negative	(-)negative	(-)negative	(-)negative
1093369	Hepatocarcinoma	15.3	74.4	7.7	41.9	29	118	575	324	224	59	1.4	(+)134.6	<2.0	(-)0.103	(+)0.003	(+)0.008	(－)negative	(－)negative	(－)negative	(－)negative
1096956	Hepatocarcinoma	9.5	67.1	22.4	37.7	26.2						1.4	(+)5785	<2.0	(-)0.134	(+)0.654	(+)0.008	(－)negative	(－)negative	(+)positive	(－)negative
1097364	Hepatocarcinoma	14.5	62.5	22	35.8	25.2	304	1306	748	526	459	1.4	N/A	N/A	N/A	N/A	N/A	(－)negative	(－)negative	(－)negative	(－)negative
1100667	Hepatocarcinoma	18.8	64.9	12.9	35.3	24.9	185	642	349	246	128	1.4	(+)5301	<2.0	(-)0.103	(+)0.003	(+)0.009	(－)negative	(－)negative	(－)negative	(－)negative
1104897	Hepatocarcinoma	11.5	58.2	29.5	33.7	23.6	207	1051	609	426	533	1.4	(+)9029	<2.0	(-)0.100	(+)0.003	(+)0.010	(－)negative	(－)negative	(－)negative	(－)negative
1091720	Intrahepatic cholangpcarcinoma	14.4	75.8	8.1	46.9	25.5	254	1333	824	449	143	1.8	(-)0.436	20	(-)0.117	(-)1.26	(+)0.008	(－)negative	(－)negative	(－)negative	(－)negative
1106427	Hepatocarcinoma	10.5	62.9	25.7	34.4	24.6	175	1046	573	410	428	1.4	(+)6394	<2.0	(+)7.21	(-)1.06	(+)0.009	(－)negative	(－)negative	(－)negative	(－)negative
1107443	Hepatocarcinoma	8.9	69.2	19.4	39.5	27.9	140	1089	621	438	305	1.4	(+)952.8	<2.0	(-)0.104	(+)0.519	(+)0.011	(－)negative	(－)negative	(－)negative	(－)negative
782113	Hepatocarcinoma	11	72	16	36	28						1.3	(+)9455	<2.0	(+)118.3	(-)1.25	(+)0.005	(－)negative	(－)negative	(－)negative	(－)negative
876379	Hepatocarcinoma	17	74	7	41	31						1.3	(+)1996COI	<2.0	(-)0.088	(+)0.003	(+)0.004	(－)negative	(－)negative	(－)negative	(－)negative
883344	Hepatocarcinoma	22	61	14	34	26						1.3	(+)1323	<2.0	(-)0.081	(+)0.005	(+)0.005	(－)negative	(－)negative	(－)negative	(－)negative
1096002	Hepatic hemangiomas	13.6	78.3	7.1	47.2	27.2	135	777	468	270	71	1.7	(-)0.275	7	(-)0.106	(-)1.01	(+)0.007	(－)negative	(－)negative	(－)negative	(－)negative
889602	Hepatocarcinoma	11	71	15	40	31	220	1420	800	620	300	1.3	(+)6095	<2.0	(-)0.082	(+)0.003	(+)0.005	(－)negative	(－)negative	(－)negative	(－)negative
923746	Hepatocarcinoma	13	73	12	36	28	195	1095	540	420	180	1.3	(-)0.444	441.2	(-)0.098	(+)0.008	(+)0.008	(－)negative	(－)negative	(－)negative	(－)negative
940818	Hepatocarcinoma	15.1	68.1	16.6	37.2	28	300	1354	741	557	330	1.3	(+)6600	<2.0	(+)11.78	(-)1.23	(+)0.008	(－)negative	(－)negative	(－)negative	(－)negative
983704	Hepatocarcinoma	11.4	68.4	19.5	37.2	29.6	182	1094	595	474	312	1.3	(+)5477	<2.0	(-)0.104	(+)0.012	(+)0.005	(－)negative	(－)negative	(－)negative	(－)negative
1104216	Hepatic cyst	10.6	79.2	8.9	46.3	28.3	248	1857	1087	663	209	1.6	(-)0.366	<2.0	(-)0.093	(-)1.58	(-)1.28	(－)negative	(－)negative	(－)negative	(－)negative
1104649	Hepatic cyst	11.5	82.3	4.1	49.9	31.1	223	1597	969	604	79	1.6	(-)0.452	931.9	(-)0.110	(+)0.047	(+)0.009	(－)negative	(－)negative	(－)negative	(－)negative
1108549	Hepatic cyst	10.2	75.3	13	41.5	26.1	101	743	410	258	128	1.6	(-)0.259	386.1	(-)0.106	(-)1.69	(-)1.77	(－)negative	(－)negative	(－)negative	(－)negative
1098110	Intrahepatic cholangpcarcinoma	11	80.2	7.7	50.3	28.1						1.8	(-)0.16	<2.0	(-)0.100	(+)0.701	(+)0.008	(－)negative	(－)negative	(+)positive	(－)negative
1049792	Hepatocarcinoma	3.7	86.2	9	45.6	34	33	776	410	306	81	1.3	(+)5746	<2.0	(-)0.093	(+)0.009	(+)0.007	(－)negative	(－)negative	(－)negative	(－)negative
1060289	Hepatocarcinoma	7.4	84.3	7.9	42.5	33.9	89	1012	510	407	95	1.3	(+)7391	<2.0	(-)0.092	(+)0.002	(+)0.008	(－)negative	(－)negative	(+)positive	(－)negative
1087798	Hepatic hemangiomas	8.8	73.8	14.8	39	25.8	68	565	299	198	113	1.5	(+)4204	<2.0	(-)0.087	(+)0.002	(+)0.009	(－)negative	(－)negative	(－)negative	(－)negative
1092408	Hepatic hemangiomas	16	76.7	6.8	44.9	30.4						1.5	(+)8436	<2.0	(-)0.116	(+)0.013	(+)0.008	(－)negative	(－)negative	(－)negative	(－)negative
1094490	Hepatic cyst	7.3	67.4	23.9	40.8	26.4	48	440	266	172	156	1.5	(-)0.292	79.2	(-)0.089	(-)1.39	(+)0.014	(－)negative	(－)negative	(+)positive	(－)negative
1109752	Intrahepatic cholangpcarcinoma	21.1	66.3	10.8	42	23.7	389	1220	774	435	200	1.8	(-)0.377	83.9	(-)0.111	(+)0.076	(+)0.009	(－)negative	(－)negative	(－)negative	(－)negative
1094749	Hepatic hemangiomas	7.2	85.4	6.7	48.4	31.9	166	1978	1121	738	156	1.5	(-)0.442	6	(-)0.099	(-)1.59	(-)2.02	(－)negative	(－)negative	(－)negative	(－)negative
935395	Intrahepatic cholangpcarcinoma	11	64	22	38	23	154	896	532	322	308	1.7	(-)0.427	14.6	(-)0.092	(-)1.47	(+)0.195	(－)negative	(－)negative	(－)negative	(－)negative
1072171	Hepatocarcinoma	10.9	64.6	22.9	36.3	26.9	262	1550	871	646	550	1.3	(+)162.0	<2.0	(-)0.120	(+)0.002	(+)0.009	(－)negative	(－)negative	(－)negative	(－)negative
1082661	Hepatocarcinoma	11.5	68.1	19.3	38	28.2	153	907	507	376	258	1.3	(+)4281	<2.0	(-)0.121	(+)0.003	(+)0.010	(－)negative	(－)negative	(+)positive	(－)negative
1086014	Hepatocarcinoma	7.1	77.9	13.7	44.2	33	122	1338	760	567	235	1.3	(+)5271	<2.0	(+)7.18	(+)0.503	(+)0.011	(－)negative	(－)negative	(－)negative	(－)negative
1087766	Hepatocarcinoma	9.7	83.3	5.9	46.1	35.5	179	1533	848	654	109	1.3	(+)8688	<2.0	(-)0.124	(+)0.079	(+)0.008	(－)negative	(－)negative	(－)negative	(－)negative
1091020	Hepatocarcinoma	11.3	58.1	29.6	31.7	23.9	172	886	484	364	451	1.3	(-)0.578	<2.0	(-)0.133	(-)1.01	(+)0.008	(－)negative	(－)negative	(+)positive	(－)negative
1096463	Hepatic hemangiomas	7.4	88.4	3.5	51.9	33.7	108	1290	758	491	51	1.5	(-)0.436	688.6	(-)0.112	(+)0.540	(+)0.008	(－)negative	(－)negative	(－)negative	(－)negative
1093204	Hepatocarcinoma	11.9	68.8	17.6	39	29.2	168	965	547	410	247	1.3	(-)0.252	>1000.0	(-)0.089	(+)0.868	(+)0.008	(－)negative	(－)negative	(+)positive	(－)negative
1099823	Hepatic hemangiomas	14.9	70.3	14.2	41	27.2	309	1457	849	564	295	1.5	(-)0.331	<2.0	(-)0.093	(-)1.60	(-)1.98	(－)negative	(－)negative	(－)negative	(－)negative
1097337	Intrahepatic cholangpcarcinoma	9.9	50.6	38.2	30.2	19.3	315	1603	955	611	1210	1.6	(-)0.311	8.4	(-)0.095	(-)1.10	(+)0.009	(－)negative	(－)negative	(－)negative	(－)negative
1093698	Hepatocarcinoma	8.1	64.1	27	33.1	25	75	591	305	230	249	1.3	(+)6659	93.9	(-)0.169	(-)1.03	(+)0.008	(－)negative	(－)negative	(－)negative	(－)negative
1095724	Hepatocarcinoma	18.4	67.4	13	40.4	31.7	155	567	339	267	109	1.3	(+)5634	<2.0	(-)0.092	(+)0.008	(+)0.008	(－)negative	(－)negative	(－)negative	(－)negative
1096094	Hepatocarcinoma	16.8	74.8	7.6	40.5	32	344	1533	831	656	156	1.3	(-)0.293	>1000.0	(-)0.106	(-)1.54	(-)1.82	(－)negative	(－)negative	(－)negative	(－)negative
1164819	Intrahepatic cholangpcarcinoma	9.8	49.4	39.9	29	19.3	149	750	440	293	605	1.5	N/A	N/A	N/A	N/A	N/A	(-)negative	(-)negative	(-)negative	(-)negative
1096974	Hepatocarcinoma	21.5	66.4	11.6	36.3	27.4	373	1152	629	475	202	1.3	(+)3774	6.4	(-)0.100	(+)0.050	(+)0.008	(－)negative	(－)negative	(+)positive	(－)negative
1097667	Hepatocarcinoma	6.9	75.7	16.8	38.9	29.9	66	724	372	287	160	1.3	(+)7158	<2.0	(-)0.083	(+)0.047	(+)0.008	(－)negative	(－)negative	(+)positive	(－)negative
1100486	Hepatic cyst	13	75.3	11	42.9	29.1	221	1287	734	496	188	1.5	(-)0.273	<2.0	(-)0.097	(-)1.58	(-)1.96	(－)negative	(－)negative	(+)positive	(－)negative
1098844	Hepatocarcinoma	11.2	72.3	15.5	37.6	28.2	182	1171	609	456	251	1.3	(+)7312	<2.0	(-)0.113	(+)0.002	(+)0.009	(－)negative	(－)negative	(+)positive	(－)negative
1038167	Intrahepatic cholangpcarcinoma	9.6	66.6	23	37.3	27.1	144	999	560	407	345	1.4	(-)0.536	44.1	(-)0.107	(-)1.70	(+)0.280	(－)negative	(－)negative	(－)negative	(－)negative
1102401	Hepatocarcinoma	12.2	81.1	5.8	41.4	31.8	160	1061	542	417	75	1.3	(+)6359	<2.0	(-)0.266	(-)1.35	(+)0.009	(－)negative	(－)negative	(－)negative	(－)negative
1109629	Hepatocarcinoma	10.9	67.5	20.7	32.8	24.6	113	697	339	254	214	1.3	(+)6972	<2.0	(+)1.97	(-)1.46	(+)0.009	(－)negative	(－)negative	(－)negative	(－)negative
1091835	Hepatic cyst	11.2	66	20.5	36.5	26.9	113	667	369	272	207	1.4	(-)0.488	11.2	(-)0.124	(-)1.25	(+)0.008	(－)negative	(－)negative	(－)negative	(－)negative
1101960	Intrahepatic cholangpcarcinoma	12.7	73.6	12.1	39	28.1	78	448	238	171	74	1.4	(+)5450	<2.0	(-)0.103	(+)0.005	(+)0.009	(－)negative	(－)negative	(－)negative	(－)negative
1109758	Hepatocarcinoma	13	67.2	17.5	36.5	28.6	206	1066	578	454	277	1.3	(+)7093	<2.0	(-)0.396	(-)1.69	(+)0.009	(－)negative	(－)negative	(－)negative	(－)negative
879950	Hepatocarcinoma	15	76	7	38	31						1.2	(+)5143	<2.0	(+)56.62	(-)1.11	(+)0.004	(－)negative	(－)negative	(－)negative	(－)negative
1007787	Hepatocarcinoma	10	69.6	18.2	36.1	30.2	180	1253	650	544	328	1.2	(+)5707	<2.0	(+)95.66	(-)1.12	(+)0.005	(－)negative	(－)negative	(－)negative	(－)negative
1033995	Hepatocarcinoma	11.8	81.2	6.4	43.2	36	95	655	349	290	52	1.2	(-)0.450	<2.0	(-)0.098	(+)0.820	(+)0.010	(－)negative	(+)30.96	(－)negative	(－)negative
1040862	Hepatocarcinoma	9.8	62.3	27.2	34	28.3	147	935	510	425	408	1.2	(+)34.83	10.9	(-)0.086	(+)0.003	(+)0.006	(－)negative	(－)negative	(－)negative	(－)negative
1040931	Hepatocarcinoma	14.7	64.4	20.2	32.9	27.1	368	1610	823	678	505	1.2	(-)0.427	77.2	(-)0.088	(-)1.41	(+)0.197	(－)negative	(+)26.9	(－)negative	(－)negative
1053038	Hepatocarcinoma	17.8	64.7	15.9	34.9	28.4	303	1100	593	483	270	1.2	(-)0.444	>1000	(-)0.109	(+)0.037	(+)0.007	(－)negative	(－)negative	(－)negative	(－)negative
1055350	Hepatocarcinoma	10.5	65.1	23.4	33.7	27.9	273	1693	876	725	608	1.2	(+)6853	<2.0	(-)0.099	(+)0.908	(+)0.009	(－)negative	(－)negative	(－)negative	(－)negative
1057747	Hepatocarcinoma	9.6	70.6	19	36.6	31.7	173	1271	659	571	342	1.2	(-)0.415	>1000	(-)0.098	(+)0.070	(+)0.008	(－)negative	(+)46.71	(－)negative	(－)negative
1118161	Intrahepatic cholangpcarcinoma	4.2	81.5	13.5	43.5	31.8	101	1958	1045	764	324	1.4	N/A	N/A	N/A	N/A	N/A	(-)negative	(-)negative	(-)negative	(-)negative
1058846	Hepatocarcinoma	8.9	57.7	32.2	30.6	25.4	142	923	490	406	515	1.2	(+)5945	<2.0	(-)0.099	(+)0.002	(+)0.008	(－)negative	(－)negative	(－)negative	(－)negative
1110496	Hepatic hemangiomas	10	79.3	9.9	43.5	31.5	79	621	341	247	78	1.4	(-)0.339	11.9	(-)0.103	(-)1.45	(+)0.428	(－)negative	(－)negative	(+)positive	(－)negative
1061927	Hepatocarcinoma	12.9	81	5.2	42.9	34.5	284	1782	944	759	114	1.2	(+)7046	<2.0	(-)0.987	(-)1.17	(+)0.009	(－)negative	(－)negative	(－)negative	(－)negative
1079334	Hepatocarcinoma	7.6	85.8	6.1	41.5	33.7	125	1408	681	553	101	1.2	(+)368.9	151.6	(-)0.170	(+)0.750	(+)0.009	(－)negative	(－)negative	(－)negative	(－)negative
1014141	Hepatic cyst	14.8	61.9	22.4	32	25.4	215	898	464	369	325	1.3	(-)0.353	<2.0	(-)0.093	(-)1.43	(-)1.92	(－)negative	(－)negative	(－)negative	(－)negative
1081360	Hepatocarcinoma	10.1	82.2	7	43.9	36.8	132	1074	574	481	92	1.2	(+)6783	<2.0	(-)0.148	(+)0.048	(+)0.011	(－)negative	(－)negative	(－)negative	(－)negative
1093352	Hepatocarcinoma	12.2	63.9	19	35.9	30	194	1015	570	477	301	1.2	(+)7104	9.2	(+)5.16	(-)1.20	(+)0.008	(－)negative	(－)negative	(－)negative	(－)negative
1094981	Hepatocarcinoma	11.7	55.6	31.4	29.6	25.7						1.2	(+)6948	<2.0	(-)0.089	(+)0.003	(+)0.008	(－)negative	(－)negative	(－)negative	(－)negative
1097134	Hepatocarcinoma	10.4	79.9	9	42.2	35.3	123	948	501	418	107	1.2	(+)7404	<2.0	(-)0.111	(+)0.002	(+)0.008	(－)negative	(－)negative	(－)negative	(－)negative
1099379	Hepatocarcinoma	2.8	87.3	9.2	40.6	33.9	11	342	159	133	36	1.2	(-)0.385	18.5	(-)0.100	(+)0.826	(+)0.009	(－)negative	(－)negative	(－)negative	(－)negative
1102430	Hepatocarcinoma	4.9	90.3	4.6	48.3	41.1	44	815	435	370	41	1.2	(+)971.2	2.9	(-)0.107	(+)0.004	(+)0.009	(－)negative	(－)negative	(－)negative	(－)negative
1104422	Hepatocarcinoma	13.6	75.5	9.6	37.1	30.5	156	865	425	350	110	1.2	(+)5594	<2.0	(-)0.257	(+)0.822	(+)0.009	(－)negative	(－)negative	(－)negative	(－)negative
1090789	Hepatic hemangiomas	7.4	77.9	13.8	42.8	33.5	123	1292	711	556	228	1.3	(-)0.362	<2.0	(-)0.122	(-)1.47	(-)1.83	(－)negative	(－)negative	(－)negative	(－)negative
1104840	Hepatocarcinoma	9.1	81	9.5	41.3	35.8	121	1082	551	478	127	1.2	(+)7679	<2.0	(-)0.112	(+)0.003	(+)0.009	(－)negative	(－)negative	(－)negative	(－)negative
1106253	Hepatocarcinoma	8.7	70.7	20.1	30.9	26						1.2	(+)7456	<2.0	(-)0.107	(+)0.004	(+)0.010	(－)negative	(－)negative	(－)negative	(－)negative
1106409	Hepatocarcinoma	1.9	87.4	9.4	45.9	39.5	9	394	207	178	42	1.2	(-)0.283	<2.0	(-)0.111	(-)1.65	(-)1.79	(－)negative	(－)negative	(+)positive	(－)negative
1106601	Intrahepatic cholangpcarcinoma	8	64.6	25.6	36.3	26.9	61	494	278	206	196	1.3	(-)0.346	<2.0	(-)0.105	(-)1.66	(+)0.010	(－)negative	(－)negative	(－)negative	(－)negative
1109416	Hepatocarcinoma	20.3	70.4	9	34.6	28.6	478	1658	816	673	211	1.2	(-)0.334	<2.0	(-)0.106	(+)0.015	(+)0.010	(－)negative	(－)negative	(－)negative	(－)negative
1097143	Hepatic hemangiomas	8.8	83.8	6.2	46.5	34.6						1.3	(-)0.373	>1000.0	(-)0.109	(-)1.18	(+)0.010	(－)negative	(－)negative	(－)negative	(－)negative
1104159	Hepatic hemangiomas	12.6	66.6	19.4	34.9	26	351	1847	969	720	538	1.3	(+)8273	<2.0	(+)1.49	(-)1.31	(+)0.009	(－)negative	(－)negative	(－)negative	(－)negative
1109640	Hepatocarcinoma	7.7	58.7	33.2	30.6	25.7						1.2	(+)6832	6.8	(-)0.122	(+)0.005	(+)0.009	(－)negative	(－)negative	(－)negative	(－)negative
1187146	Intrahepatic cholangpcarcinoma	10.7	60.5	27.8	33.4	25.6	250	1419	782	599	651	1.3	N/A	N/A	N/A	N/A	N/A	(-)negative	(-)negative	(-)negative	(-)negative
835983	Hepatocarcinoma	21.6	61.2	16.5	31.1	29	196	557	283	264	150	1.1	(+)28.10	9	(-)0.111	(+)0.003	(+)0.008	(－)negative	(－)negative	(－)negative	(－)negative
872870	Hepatocarcinoma	12	47	37	23	21						1.1	(-)0.512	7.7	(-)0.096	(+)0.606	(+)0.004	(－)negative	(－)negative	(－)negative	(－)negative
874377	Hepatocarcinoma	18	74	8	39	34						1.1	(+)8304	<2.0	(-)0.091	(+)0.003	(+)0.004	(－)negative	(－)negative	(－)negative	(－)negative
968113	Hepatocarcinoma	12.4	51	35.3	25.1	23.2	163	669	330	304	464	1.1	(+)1993	<2.0	(+)2.51	(+)0.822	(+)0.008	(－)negative	(－)negative	(－)negative	(－)negative
1039263	Hepatocarcinoma	9.7	34.1	55.4	17.5	15.3	378	1330	683	597	2161	1.1	(+)4921	<2.0	(-)0.105	(+)0.003	(+)0.009	(－)negative	(－)negative	(－)negative	(－)negative
1105890	Hepatic hemangiomas	5.6	76	17.9	38.9	30.5	54	734	376	295	173	1.3	(-)0.411	9.8	(-)0.110	(-)1.30	(+)0.009	(－)negative	(－)negative	(－)negative	(－)negative
1053821	Hepatocarcinoma	12.6	58.9	27.4	28.5	26.1	252	1178	570	522	548	1.1	(+)7815	<2.0	(-)0.100	(+)0.002	(+)0.008	(－)negative	(－)negative	(－)negative	(－)negative
1071011	Hepatocarcinoma	6.4	69.9	22.2	35.6	33.1	128	1398	712	662	444	1.1	(+)6924	10.7	(-)0.116	(+)0.003	(+)0.010	(－)negative	(－)negative	(－)negative	(－)negative
1072036	Hepatocarcinoma	10.5	76.7	11.3	36.8	34.5						1.1	(+)3896	<2.0	(-)0.115	(+)0.003	(+)0.009	(－)negative	(－)negative	(－)negative	(－)negative
1107671	Hepatic hemangiomas	12	79.1	8.1	43.3	33.9	220	1448	793	620	148	1.3	(-)0.446	53.8	(-)0.117	(-)1.70	(+)0.789	(－)negative	(－)negative	(+)positive	(－)negative
1084212	Hepatocarcinoma	7.9	77.6	13.5	39.5	36.7	207	2027	1032	960	352	1.1	(+)5891	<2.0	(-)0.126	(+)0.003	(+)0.010	(－)negative	(－)negative	(－)negative	(－)negative
1092389	Hepatocarcinoma	6.1	61.6	31.2	29.2	27.1	82	822	389	362	417	1.1	(+)4466	<2.0	(-)0.214	(-)1.12	(+)0.008	(－)negative	(－)negative	(－)negative	(－)negative
1095234	Hepatocarcinoma	10.1	78.4	9.7	37.9	35.9	239	1862	899	852	230	1.1	(-)0.374	39.7	(-)0.122	(+)0.910	(+)0.009	(－)negative	(－)negative	(－)negative	(－)negative
1092220	Hepatic hemangiomas	10.4	66.4	21.8	31.8	26.9						1.2	(-)0.428	<2.0	(-)0.113	(-)1.56	(-)1.78	(－)negative	(－)negative	(－)negative	(－)negative
1095623	Hepatocarcinoma	10.6	65.1	23.8	32.5	28.9						1.1	(+)6988	<2.0	(-)0.596	(+)0.634	(+)0.009	(－)negative	(－)negative	(+)positive	(－)negative
1097449	Hepatocarcinoma	9.2	68.9	21.2	33.6	31.5	130	978	477	448	302	1.1	(+)6307	<2.0	(-)0.128	(+)0.351	(+)0.010	(－)negative	(－)negative	(－)negative	(－)negative
1092579	Hepatic hemangiomas	22	72.3	4.4	38.4	31.8	380	1250	664	549	75	1.2	(-)0.381	<2.0	(-)0.116	(-)1.50	(-)1.87	(－)negative	(－)negative	(－)negative	(－)negative
1099777	Hepatocarcinoma	15.4	66	18.1	32.7	30.6						1.1	(-)0.402	35.3	(-)0.123	(-)1.02	(+)0.008	(－)negative	(－)negative	(－)negative	(－)negative
1100575	Hepatocarcinoma	5.4	77.4	16.6	34.7	31.2	95	1363	611	549	292	1.1	(+)7153	<2.0	(-)0.090	(+)0.009	(+)0.008	(－)negative	(－)negative	(+)positive	(－)negative
1104154	Hepatocarcinoma	21.2	71.9	6.1	35.8	33.7	400	1359	677	637	116	1.1	(+)7565	20.8	(-)0.445	(+)0.335	(+)0.009	(－)negative	(－)negative	(+)positive	(－)negative
1104194	Hepatocarcinoma	18.6	72.6	8.1	37	33.2	193	754	384	345	84	1.1	(+)6788	<2.0	(-)0.102	(+)0.003	(+)0.009	(－)negative	(－)negative	(+)positive	(－)negative
1104732	Hepatocarcinoma	12	69.9	17	34.3	30.9	240	1400	686	619	340	1.1	(+)9024	<2.0	(-)0.100	(+)0.003	(+)0.009	(－)negative	(－)negative	(－)negative	(－)negative
1094996	Hepatic hemangiomas	12.3	71.5	15.6	38.2	32.9	164	954	509	439	208	1.2	(-)0.274	182.4	(-)0.094	(+)0.905	(+)0.009	(－)negative	(－)negative	(+)positive	(－)negative
1101580	Hepatic hemangiomas	10	76.7	11.7	38.8	31.7	113	865	437	357	132	1.2	(-)0.467	<2.0	(-)0.101	(-)2.04	(-)1.43	(－)negative	(－)negative	(－)negative	(－)negative
1109306	Hepatocarcinoma	7	70.9	21.2	31	27.5	53	544	238	211	163	1.1	(+)7243	<2.0	(-)0.114	(+)0.004	(+)0.010	(－)negative	(－)negative	(－)negative	(－)negative
1110088	Hepatocarcinoma	14.3	76.3	7.5	35.6	33.5	284	1512	704	663	148	1.1	(+)71.89	<2.0	(-)0.110	(+)0.010	(+)0.011	(－)negative	(－)negative	(－)negative	(－)negative
1092677	Hepatic hemangiomas	12.9	52.4	33.9	25.2	23.5						1.1	(-)0.397	<2.0	(-)0.123	(+)0.988	(+)0.010	(－)negative	(－)negative	(－)negative	(－)negative
1110102	Hepatocarcinoma	16.2	73.1	9.1	35.2	33.3	245	1106	532	503	138	1.1	(+)5310	<2.0	(-)0.116	(+)0.004	(+)0.009	(－)negative	(－)negative	(－)negative	(－)negative
1096468	Hepatic hemangiomas	19.9	57.3	18.7	29.2	25.6	288	830	423	371	271	1.1	(-)0.274	<2.0	(-)0.098	(-)1.58	(-)2.10	(－)negative	(－)negative	(－)negative	(－)negative
878841	Hepatocarcinoma	12	83	2	39	40						1	(+)138.7	<2.0	(-)0.085	(+)0.021	(+)0.004	(－)negative	(－)negative	(－)negative	(－)negative
1044640	Hepatocarcinoma	15.2	70.2	13.1	34	32.5	167	772	374	358	144	1	(+)6633	<2.0	(-)0.093	(+)0.002	(+)0.007	(－)negative	(－)negative	(－)negative	(－)negative
1064285	Hepatocarcinoma	10.8	84	4.6	41.3	40.4	238	1848	909	889	101	1	(+)3094	<2.0	(-)0.668	(-)1.20	(+)0.009	(－)negative	(－)negative	(+)positive	(－)negative
1102891	Hepatic hemangiomas	17.6	76.3	4.9	35.2	33	176	759	351	329	49	1.1	(-)0.620	<2.0	(-)0.100	(-)1.80	(-)1.68	(－)negative	(－)negative	(+)positive	(－)negative
1072308	Hepatocarcinoma	7.5	76.7	14.5	37.8	36.8	105	1074	529	515	203	1	(+)738.8	<2.0	(-)0.258	(-)1.02	(+)0.009	(－)negative	(－)negative	(－)negative	(－)negative
1086716	Hepatocarcinoma	15.4	74.7	9	36.8	36	167	809	398	389	97	1	(+)3223	<2.0	(-)0.118	(+)0.003	(+)0.008	(－)negative	(－)negative	(－)negative	(－)negative
1089808	Hepatocarcinoma	10.3	65.4	23.8	29.5	29.7						1	(-)0.597	148.7	(-)0.130	(+)0.520	(+)0.008	(－)negative	(－)negative	(+)positive	(+)positive
1090910	Hepatocarcinoma	9.5	67.2	22.2	32.5	33						1	(+)4810	<2.0	(-)0.119	(+)0.006	(+)0.008	(－)negative	(－)negative	(－)negative	(－)negative
1091133	Hepatocarcinoma	5.4	66.5	27.3	28.7	29.3	92	1126	486	496	463	1	(+)2906	<2.0	(-)0.120	(+)0.003	(+)0.007	(－)negative	(－)negative	(－)negative	(－)negative
1093739	Hepatocarcinoma	15.3	65.1	16.9	30.2	31.1	280	1194	554	570	310	1	(+)4803	<2.0	(-)0.087	(+)0.003	(+)0.008	(－)negative	(－)negative	(－)negative	(－)negative
1102467	Hepatocarcinoma	5.5	81.2	12.7	35.8	35.7	76	1122	494	493	176	1	(+)5887	5.7	(-)0.107	(+)0.347	(+)0.009	(－)negative	(－)negative	(－)negative	(－)negative
1107300	Hepatocarcinoma	6.7	77.6	15	35.7	36						1	(+)6839	20.2	(+)75.27	(-)1.05	(+)0.009	(－)negative	(－)negative	(－)negative	(－)negative
1026477	Hepatocarcinoma	12.1	83.4	4.2	40.3	44.5	230	1585	766	846	80	0.9	(+)3218	19.1	(-)0.097	(+)0.003	(+)0.008	(－)negative	(－)negative	(－)negative	(－)negative
1039629	Hepatocarcinoma	12.9	77.3	8.3	35.4	40.5	245	1469	673	770	158	0.9	(-)0.472	<2.0	(-)0.095	(+)0.933	(+)0.006	(－)negative	(－)negative	(－)negative	(－)negative
1040653	Hepatocarcinoma	21.9	69	8.3	30.6	32.4	453	1430	634	673	173	0.9	(+)5622	<2.0	(-)0.115	(+)0.007	(+)0.008	(－)negative	(－)negative	(－)negative	(－)negative
1047327	Hepatocarcinoma	16	65.9	17.6	29.4	34.1	352	1450	647	750	387	0.9	(+)5924	<2.0	(-)0.091	(+)0.002	(+)0.007	(－)negative	(－)negative	(+)positive	(－)negative
1050639	Hepatocarcinoma	11.8	73	14.1	32.7	35.6	130	803	360	392	155	0.9	(-)0.610	<2.0	(-)0.080	(+)0.886	(+)0.007	(－)negative	(－)negative	(－)negative	(－)negative
1052260	Hepatocarcinoma	14.5	75.9	8.9	32.2	37.2	334	1746	741	856	205	0.9	(+)3315	<2.0	(-)0.101	(+)0.002	(+)0.007	(－)negative	(－)negative	(－)negative	(－)negative
1092671	Hepatic hemangiomas	7.1	66.8	23.5	30.9	33.9						0.9	(-)0.385	29.1	(-)0.123	(-)1.05	(+)0.008	(－)negative	(－)negative	(－)negative	(－)negative
1058698	Hepatocarcinoma	10.3	65.5	23.5	30.6	34						0.9	(+)28.55	<2.0	(-)0.094	(+)0.002	(+)0.008	(－)negative	(－)negative	(－)negative	(－)negative
1074872	Hepatocarcinoma	11.2	58.5	28.9	26.4	28.5	216	1122	506	547	553	0.9	(+)680.4	<2.0	(-)0.110	(+)0.002	(+)0.008	(－)negative	(－)negative	(－)negative	(－)negative
1077095	Hepatocarcinoma	11.7	80.9	6.9	35.5	37.5	105	728	320	338	62	0.9	(+)6978	<2.0	(-)0.120	(+)0.008	(+)0.010	(－)negative	(－)negative	(－)negative	(－)negative
1081887	Hepatocarcinoma	7.3	74.7	17.5	29.4	34.5						0.9	(+)7215	<2.0	(-)0.114	(+)0.003	(+)0.010	(－)negative	(－)negative	(－)negative	(－)negative
1083265	Hepatocarcinoma	4.7	76.5	17.3	35.4	37.5	65	1071	495	525	242	0.9	(+)6001	<2.0	(+)18.55	(-)1.68	(+)0.010	(－)negative	(－)negative	(－)negative	(－)negative
1090158	Hepatocarcinoma	10	68.4	19.6	30.8	35.3	204	1397	628	721	401	0.9	(+)6641	<2.0	(+)2.19	(-)1.20	(+)0.008	(－)negative	(－)negative	(+)positive	(－)negative
1101210	Hepatocarcinoma	5	71.7	21.4	32.7	36.8						0.9	(+)7701	<2.0	(-)0.109	(+)0.054	(+)0.008	(－)negative	(－)negative	(－)negative	(－)negative
1091543	Intrahepatic cholangpcarcinoma	11.7	71	17.1	37.2	31.9						1.2	(-)0.440	<2.0	(-)0.128	(-)1.08	(+)0.008	(－)negative	(－)negative	(－)negative	(－)negative
1106895	Hepatocarcinoma	13.4	68.3	17.4	30.4	32.1	74	376	168	177	96	0.9	(+)2620	<2.0	(-)0.108	(+)0.003	(+)0.010	(+)1.01	(－)negative	(+)positive	(－)negative
1107967	Hepatocarcinoma	10.7	69.2	19.4	29.2	32.7	208	1345	568	635	378	0.9	(-)0.398	<2.0	(-)0.118	(-)1.76	(-)1.85	(－)negative	(－)negative	(－)negative	(－)negative
787869	Hepatocarcinoma	32	63	3	27	32						0.8	(+)8258	<2.0	(+)60.54	(-)1.06	(+)0.005	(－)negative	(－)negative	(－)negative	(－)negative
881974	Hepatocarcinoma	16	76	6	30	39						0.8	(+)23.35	<2.0	(-)0.084	(+)0.004	(+)0.004	(－)negative	(－)negative	(－)negative	(－)negative
885456	Hepatocarcinoma	3	71	26	30	38						0.8	(+)7143	<2.0	(-)0.081	(+)0.004	(+)0.005	(－)negative	(－)negative	(－)negative	(－)negative
1038542	Hepatocarcinoma	13.5	63.6	22.4	22.2	28.5	257	1208	422	542	426	0.8	(+)2740	<2.0	(-)0.097	(+)0.003	(+)0.008	(－)negative	(－)negative	(－)negative	(－)negative
1054373	Hepatocarcinoma	9.4	72	18.1	29.5	35.7	94	720	295	357	181	0.8	(+)1453	<2.0	(-)0.101	(+)0.187	(+)0.008	(－)negative	(－)negative	(+)positive	(－)negative
1055052	Hepatocarcinoma	1.5	69.2	28.5	28.1	34.4	24	1107	450	550	456	0.8	(+)4577	<2.0	(-)0.109	(+)0.122	(+)0.009	(－)negative	(－)negative	(－)negative	(－)negative
1057763	Hepatocarcinoma	3.4	82.5	13.2	26.6	31.4	54	1320	426	502	211	0.8	(+)6312	<2.0	(-)0.093	(+)0.007	(+)0.008	(－)negative	(－)negative	(－)negative	(－)negative
1071287	Hepatocarcinoma	10.2	61.5	26.5	24.6	31.9	428	2583	1033	1340	1113	0.8	(+)19.24	<2.0	(-)0.121	(+)0.364	(+)0.009	(－)negative	(－)negative	(+)positive	(－)negative
1097878	Hepatic hemangiomas	10.6	77.1	11.3	30.8	39.7						0.8	(-)0.386	>1000.0	(-)0.102	(-)1.58	(-)1.67	(－)negative	(－)negative	(－)negative	(－)negative
1088467	Hepatocarcinoma	7.8	77.8	13.2	32.8	42.7	97	969	408	532	165	0.8	(+)6646	<2.0	(+)40.78	(-)1.33	(+)0.008	(－)negative	(－)negative	(－)negative	(－)negative
1088726	Hepatocarcinoma	4	70.7	24.2	29.1	35.1	75	1338	552	664	457	0.8	(+)5726	4.6	(-)0.078	(+)0.002	(+)0.008	(－)negative	(－)negative	(－)negative	(－)negative
1095013	Hepatocarcinoma	4.8	84.7	9.8	34.3	44.8	43	749	303	397	87	0.8	(+)7359	<2.0	(-)0.093	(+)0.002	(+)0.009	(－)negative	(－)negative	(－)negative	(－)negative
1098562	Hepatic cyst	14	75.9	8.7	32.4	40.3	250	1360	581	723	156	0.8	(-)0.391	<2.0	(-)0.101	(-)1.64	(-)2.12	(－)negative	(－)negative	(－)negative	(－)negative
1095842	Hepatocarcinoma	4.7	77.9	16.5	33.7	43.6	77	1285	556	719	272	0.8	(+)6411	9.2	(-)0.113	(+)0.149	(+)0.008	(－)negative	(－)negative	(+)positive	(－)negative
1010901	Hepatic hemangiomas	7	79.1	13.4	31.1	46.4	116	1315	516	771	223	0.7	(-)0.434	23.4	(-)0.100	(-)1.40	(+)0.010	(－)negative	(－)negative	(－)negative	(－)negative
1101247	Hepatocarcinoma	6.6	83	10	32.5	38.9	134	1698	666	795	204	0.8	(+)6856	<2.0	(-)0.093	(+)0.003	(+)0.008	(－)negative	(－)negative	(－)negative	(－)negative
1096691	Intrahepatic cholangpcarcinoma	10.3	73.8	14.6	39.4	33.7	162	1157	618	528	228	1.2	(-)0.354	>1000.0	(-)0.118	(+)0.047	(+)0.008	(－)negative	(－)negative	(－)negative	(－)negative
1102848	Hepatocarcinoma	15.9	78.1	5.5	30.9	39.7	161	790	313	402	56	0.8	(+)6270	<2.0	(-)0.097	(+)0.243	(+)0.009	(－)negative	(－)negative	(－)negative	(－)negative
1106135	Hepatocarcinoma	12.2	64.7	22	23.5	30.6	132	699	254	331	238	0.8	(+)5884	6.3	(-)0.564	(+)0.489	(+)0.009	(－)negative	(－)negative	(－)negative	(－)negative
1075912	Hepatocarcinoma	11.2	72.9	15.7	28.5	43.2	347	2260	884	1339	487	0.7	(+)5685	6.5	(-)0.118	(+)0.003	(+)0.010	(－)negative	(－)negative	(－)negative	(－)negative
1095393	Hepatocarcinoma	15.3	55.9	28.5	19.8	32.9	271	991	351	584	506	0.6	(+)5.60	<2.0	(-)0.093	(+)0.152	(+)0.009	(－)negative	(－)negative	(－)negative	(－)negative
1099788	Intrahepatic cholangpcarcinoma	6.6	87.8	4.6	43.8	37.7	54	716	358	307	38	1.2	(-)0.424	4.1	(-)0.186	(-)1.19	(+)0.009	(－)negative	(－)negative	(－)negative	(－)negative
1098519	Hepatocarcinoma	8.1	78.8	12.3	27.5	46.8	125	1210	422	719	189	0.6	(+)4888	2.7	(-)0.121	(-)1.33	(+)0.011	(－)negative	(－)negative	(－)negative	(－)negative
1104737	Hepatocarcinoma	10.1	67.1	21	24.5	41.1	174	1152	421	706	361	0.6	(+)15.54	33.4	(-)0.103	(+)0.008	(+)0.010	(－)negative	(－)negative	(－)negative	(－)negative
1088048	Hepatocarcinoma	4.5	78.6	15.3	25.1	48.9	54	944	302	587	184	0.5	(+)3240	7	(-)0.110	(+)0.003	(+)0.008	(－)negative	(－)negative	(+)positive	(－)negative
1106898	Hepatocarcinoma	4.7	82.6	12.4	26.7	55.7	95	1671	540	1128	251	0.5	(+)6821	<2.0	(-)0.121	(+)0.060	(+)0.010	(－)negative	(－)negative	(－)negative	(－)negative
1096619	Hepatic hemangiomas	3.9	70.3	25.2	23.9	39						0.6	(-)0.416	<2.0	(-)0.115	(-)1.51	(-)1.83	(－)negative	(－)negative	(－)negative	(－)negative
1108099	Hepatic hemangiomas	4.5	86.4	8.4	20.5	63.4	28	544	129	399	53	0.3	(-)0.448	<2.0	(-)0.100	(-)2.06	(-)2.08	(－)negative	(－)negative	(－)negative	(－)negative
1036494	Intrahepatic cholangpcarcinoma	9.1	85.2	5.2	40	36.3						1.1	(-)0.387	4.9	(-)0.093	(+)0.841	(+)0.008	(－)negative	(－)negative	(－)negative	(－)negative
1094609	Intrahepatic cholangpcarcinoma	4.5	84.1	10.1	42.7	40.9	57	1064	541	517	128	1	(-)0.337	128.2	(-)0.087	(+)0.007	(+)0.007	(－)negative	(－)negative	(－)negative	(－)negative
889671	Intrahepatic cholangpcarcinoma	10.2	72.6	16.8	33.8	38.5	122	871	406	462	202	0.9	N/A	N/A	N/A	N/A	N/A	(-)negative	(-)negative	(-)negative	(-)negative
1098592	Intrahepatic cholangpcarcinoma	13.5	62.1	20.9	26.3	28.8	102	468	198	217	158	0.9	(-)0.335	36.3	(-)0.094	(-)1.43	(+)0.661	(－)negative	(－)negative	(－)negative	(－)negative
1095006	Intrahepatic cholangpcarcinoma	9.1	67	22.2	30.9	37.8	137	1004	462	567	332	0.8	(-)0.488	>1000.0	(-)0.099	(+)0.085	(+)0.008	(－)negative	(－)negative	(－)negative	(－)negative
1109025	Intrahepatic cholangpcarcinoma	11.4	74.2	14.2	23.4	32.5	110	715	225	313	137	0.7	(+)757.9	<2.0	(-)0.120	(+)0.004	(+)0.010	(－)negative	(－)negative	(－)negative	(－)negative
1107333	Hepatocarcinoma	1.9	92.1	5.2	27.5	63	26	1277	382	874	72	0.4	(+)7754	<2.0	(-)0.113	(+)0.003	(+)0.009	(－)negative	(－)negative	(－)negative	(－)negative

## Sheet: Supplementary Table 3
Hospital ID	Type	Data of surgeries	Sex	Age (year)	Total Bilirubin	Albumin	Alanine aminotransferase	Aspartate aminotransferase	Gamma-glutamyltransferase	Prothrombin time	AFP	CEA	CA199	HBsAg	HBsAb	HBeAg	HBeAb	HBcAb	anti-HAV IgM	anti-HCV antibody	anti-HDV IgG	anti-HDV IgM	Lymph node metastasis	Perihepatic invasion	PVTT	Tumor number	Maximum tumor diameter(cm)	Survive	Survival time (day)	Recurrence	Recurrence Time (day)	Proportion in percentage(%)					Cell count(cell/ml)					CD4/CD8
																																CD19+ B cell	CD3+ T cell	CD56+CD16+ NK cell	CD3+ CD4+ T cell	CD3+ CD8+ T cell	CD19+ B cell	CD3+ T cell	CD3+ CD4+ T cell	CD3+ CD8+ T cell	CD56+CD16+ NK cell
921009	Hepatocarcinoma	2015-08-25	male	57	4.1	40	45	149	159	12.1	6788	0.9	9.9	(+)98.84	36.6	(+)352.7	(-)2.45	(+)0.008	(－)negative	(－)negative	(－)negative	(－)negative	0	0	1	3	11	0	156	1	90	26	65	8	37	23	338	845	481	299	104	1.6
1102430	Hepatocarcinoma	2018-03-07	male	55	10.2	39	16	24	78	12.1	24414	2	2.9	(+)971.2	2.9	(-)0.107	(+)0.004	(+)0.009	(－)negative	(－)negative	(－)negative	(－)negative	0	0	0	1	15	0	264	0	264	4.9	90.3	4.6	48.3	41.1	44	815	435	370	41	1.2
1107443	Hepatocarcinoma	2018-03-29	male	62	32.2	39	10	20	27	12.6	2.2	2.3	25.9	(+)952.8	<2.0	(-)0.104	(+)0.519	(+)0.011	(－)negative	(－)negative	(－)negative	(－)negative	0	0	0	1	3	0	1615	0	1615	8.9	69.2	19.4	39.5	27.9	140	1089	621	438	305	1.4
1065970	Hepatocarcinoma	2017-09-15	male	60	14.3	37	17	20	114	11.8	404.8	4.1	25.4	(+)949.0	<2.0	(-)0.114	(-)1.37	(+)0.008	(－)negative	(－)negative	(－)negative	(－)negative	0	0	0	1	2	0	745	1	166	14	68.3	16	54.1	13.1	196	956	757	183	224	4.1
1104897	Hepatocarcinoma	2018-03-16	female	45	11.3	43	55	42	32	11.6	4.7	2.2	24	(+)9029	<2.0	(-)0.100	(+)0.003	(+)0.010	(－)negative	(－)negative	(－)negative	(－)negative	0	0	0	1	7	0	544	0	544	11.5	58.2	29.5	33.7	23.6	207	1051	609	426	533	1.4
932921	Intrahepatic cholangpcarcinoma	2015-11-10	male	79	17.4	24	204	233	125	13.5	3.9	15	>10000.0	(-)0.475	166.5	(-)0.087	(-)1.10	(+)0.008	(－)negative	(－)negative	(－)negative	(－)negative	0	0	0	1	12	1	736	1	736	9	51	38	37	13	135	765	555	195	570	2.8
1104732	Hepatocarcinoma	2018-03-21	male	43							182.3	2.3	8	(+)9024	<2.0	(-)0.100	(+)0.003	(+)0.009	(－)negative	(－)negative	(－)negative	(－)negative	0	0	0	1	1.5	0	1129	0	1129	12	69.9	17	34.3	30.9	240	1400	686	619	340	1.1
1087766	Hepatocarcinoma	2018-01-11	male	43	18.2	40	23	23	64	13	93.1	1.6	45.2	(+)8688	<2.0	(-)0.124	(+)0.079	(+)0.008	(－)negative	(－)negative	(－)negative	(－)negative	0	0	0	1	2.5	0	48	0	48	9.7	83.3	5.9	46.1	35.5	179	1533	848	654	109	1.3
1092489	Hepatocarcinoma	2018-01-15	female	42	14.8	47	64	49	184	12.7	8056	0.4	13.9	(+)8476	<2.0	(+)1.53	(+)0.876	(+)0.008	(－)negative	(－)negative	(－)negative	(－)negative	0	0	0	2	6	1	998	1	608	16.4	78	3.6	49.8	21.7	219	1043	666	291	48	2.3
948427	Intrahepatic cholangpcarcinoma	2017-08-11	female	70	12.9	45	150	297	238	11.2	2.7	1.9	3536	(-)0.386	161.3	(-)0.095	(-)1.24	(+)0.012	(－)negative	(－)negative	(－)negative	(+)positive	1	1	0	3	5.5	0	46	0	46	7.2	83.9	8.5	55.5	27.1	144	1678	1110	542	170	2
1089057	Hepatocarcinoma	2017-12-28	male	69	19.5	48	69	52	230	11.3	39.8	5.2	19.1	(+)802.1	<2.0	(-)0.123	(+)0.068	(+)0.007	(－)negative	(－)negative	(－)negative	(－)negative	0	0	0	2	1.7	0	1061	1	1049	13.8	67.4	16.9	46.1	16.4	227	1112	761	271	278	2.8
1090053	Hepatocarcinoma	2018-01-03	male	46	14.9	45	27	19	23	10.9	1737	0.8	5.4	(+)8.14	<2.0	(-)0.116	(-)1.02	(+)0.008	(－)negative	(－)negative	(－)negative	(－)negative	0	0	0	1	1.5	0	30	0	30	19.4	68.3	11.7	45.9	20.5	206	725	488	218	125	2.2
1042856	Hepatocarcinoma	2017-06-19	male	61	12.5	36	69	100	1564	12.1	6.1	7.9	62.2	(+)797.7	<2.0	(-)0.086	(+)0.041	(+)0.007	(－)negative	(－)negative	(－)negative	(－)negative	0	0	0	2	9	0	266	1	215	13.6	41	43.6	26.1	14.3	218	656	418	229	698	1.8
1053821	Hepatocarcinoma	2017-07-28	male	58	20.8	49	21	20	29	10.8	8.2	2	4.7	(+)7815	<2.0	(-)0.100	(+)0.002	(+)0.008	(－)negative	(－)negative	(－)negative	(－)negative	0	0	1	3	5.5	0	32	0	32	12.6	58.9	27.4	28.5	26.1	252	1178	570	522	548	1.1
1107333	Hepatocarcinoma	2018-03-27	male	60	7.6	30	34	35	79	13.2	407	2.6	148	(+)7754	<2.0	(-)0.113	(+)0.003	(+)0.009	(－)negative	(－)negative	(－)negative	(－)negative	0	0	0	2	8	1	628	1	628	1.9	92.1	5.2	27.5	63	26	1277	382	874	72	0.4
1092737	Hepatocarcinoma	2018-01-19	male	48	17.8	47	25	24	60	11.8	72.2	2	11	(+)7739	<2.0	(-)0.144	(+)0.097	(+)0.008	(－)negative	(－)negative	(－)negative	(－)negative	0	0	0	2	3.2	0	881	0	881	15.9	69.2	13.1	46.4	17.4	166	723	485	182	137	2.7
1103089	Hepatocarcinoma	2018-03-08	male	66	18.7	48	33	32	39	11.8	16.4	2.9	18.3	(+)7720	<2.0	(-)0.110	(+)0.003	(+)0.009	(－)negative	(－)negative	(+)positive	(－)negative	0	0	0	2	3	0	1156	1	922	8.7	49.6	40.3	31.6	16.2	139	791	503	258	641	2
1104840	Hepatocarcinoma	2018-03-20	male	67	17.4	41	29	27	47	12.9	22.4	2.3	8.2	(+)7679	<2.0	(-)0.112	(+)0.003	(+)0.009	(－)negative	(－)negative	(－)negative	(－)negative	0	0	0	2	10	0	768	0	768	9.1	81	9.5	41.3	35.8	121	1082	551	478	127	1.2
1104154	Hepatocarcinoma	2018-03-20	male	62	14	39	85	61	63	12	7.8	6.4	36.2	(+)7565	20.8	(-)0.445	(+)0.335	(+)0.009	(－)negative	(－)negative	(+)positive	(－)negative	0	0	0	1	5.5	0	631	1	478	21.2	71.9	6.1	35.8	33.7	400	1359	677	637	116	1.1
1089943	Hepatocarcinoma	2018-01-02	male	63	17.5	41	114	56	171	10.9	933	1.4	11.4	(+)7530	2.6	(+)10.81	(+)0.228	(+)0.008	(－)negative	(－)negative	(－)negative	(－)negative	0	0	1	1	4.5	0	1001	1	347	5.2	79.6	15	55.8	21.5	36	551	386	149	104	2.6
1104206	Hepatocarcinoma	2018-03-15	female	59	9.6	43	16	19	16	12.4	183.5	1.3	13.9	(+)7527	<2.0	(+)1.20	(-)1.25	(+)0.009	(－)negative	(－)negative	(－)negative	(－)negative	0	0	0	1	1.8	0	1457	0	1457	15.1	71.1	13.5	46.8	22.8	232	1092	720	351	207	2.1
1061705	Hepatocarcinoma	2017-08-26	male	63	8.7	41	25	20	42	10.9	6.1	1.3	28.6	(+)7518	<2.0	(-)0.090	(+)0.174	(+)0.009	(－)negative	(－)negative	(+)positive	(－)negative	0	0	0	2	4	0	30	0	30	18.8	68.5	10.9	46.6	19.8	451	1644	1118	475	262	2.4
1100928	Hepatocarcinoma	2018-03-02	male	47	8.8	48	43	44	143	11.7	47.1	3.1	11	(+)7497	<2.0	(-)0.099	(+)0.003	(+)0.008	(－)negative	(－)negative	(+)positive	(－)negative	0	0	0	1	6	0	1096	1	619	17.9	58.2	23.5	32.9	16.4	182	592	334	167	239	2
1097134	Hepatocarcinoma	2018-02-08	female	65	9.9	49	17	31	73	11.4	12339	3.1	14.1	(+)7404	<2.0	(-)0.111	(+)0.002	(+)0.008	(－)negative	(－)negative	(－)negative	(－)negative	0	0	0	1	5	0	974	1	788	10.4	79.9	9	42.2	35.3	123	948	501	418	107	1.2
1060289	Hepatocarcinoma	2017-08-24	male	52	12.1	35	19	71	177	13.7	2449	1	4.9	(+)7391	<2.0	(-)0.092	(+)0.002	(+)0.008	(－)negative	(－)negative	(+)positive	(－)negative	0	0	0	1	28	0	872	1	74	7.4	84.3	7.9	42.5	33.9	89	1012	510	407	95	1.3
1106580	Hepatocarcinoma	2018-04-08	male	61	14.5	38	106	68	331	10.7	507.5	1.9	22.2	(+)7387	28.4	(-)0.106	(+)0.003	(+)0.009	(－)negative	(－)negative	(－)negative	(－)negative	0	0	0	1	10	0	1103	0	1103	11.8	73.8	13.3	43	28.3	74	460	268	176	83	1.5
1097675	Hepatocarcinoma	2018-02-07	female	66	14.2	47	19	25	23	11.3	6.2	3.1	23.4	(+)7386	<2.0	(-)0.090	(+)0.020	(+)0.009	(－)negative	(－)negative	(－)negative	(－)negative	0	0	0	1	3	0	1679	1	1133	18.5	74.6	5.8	51.4	21.6	383	1548	1068	448	121	2.4
1072308	Hepatocarcinoma	2017-10-24	male	58	11.7	37	12	30	195	13.4	>60500	1.6	51.5	(+)738.8	<2.0	(-)0.258	(-)1.02	(+)0.009	(－)negative	(－)negative	(－)negative	(－)negative	0	0	1	10	15	1	212	1	212	7.5	76.7	14.5	37.8	36.8	105	1074	529	515	203	1
1040302	Hepatocarcinoma	2017-05-24	male	69	13.9	38	46	52	91	12.9	8.8	6.3	24.2	(+)7332	<2.0	(-)0.090	(+)0.002	(+)0.006	(－)negative	(－)negative	(－)negative	(－)negative	0	0	0	2	2.5	0	1519	1	1511	16.9	63	17.5	52	7.2	135	504	416	58	140	7.2
1106736	Hepatocarcinoma	2018-03-27	male	63	14.9	46	33	27	204	11.4	2.7	22.6	28.1	(+)7330	<2.0	(-)0.106	(+)0.003	(+)0.009	(－)negative	(－)negative	(－)negative	(－)negative	0	0	0	1	12.5	0	1596	0	949	19.6	53.2	24.9	32.7	18.4	247	672	413	232	315	1.8
1090321	Hepatocarcinoma	2018-01-03	male	61	22.4	43	25	19	38	12.4	3234	3	14.2	(+)7323	<2.0	(-)0.120	(+)0.015	(+)0.008	(－)negative	(－)negative	(－)negative	(－)negative	0	0	0	1	8.5	0	1010	1	346	7.8	78	13.6	49.4	28.5	126	1263	799	462	220	1.7
1038167	Intrahepatic cholangpcarcinoma	2017-05-11	male	54	24.9	48	20	15	64	10.4	7.2	13.8	>10000.0	(-)0.536	44.1	(-)0.107	(-)1.70	(+)0.280	(－)negative	(－)negative	(－)negative	(－)negative	1	0	0	3	8	1	400	1	400	9.6	66.6	23	37.3	27.1	144	999	560	407	345	1.4
1098844	Hepatocarcinoma	2018-02-11	male	65	13.5	41	22	26	20	12.3	78.6	3.2	1.4	(+)7312	<2.0	(-)0.113	(+)0.002	(+)0.009	(－)negative	(－)negative	(+)positive	(－)negative	0	0	0	1	2.5	0	818	1	818	11.2	72.3	15.5	37.6	28.2	182	1171	609	456	251	1.3
1038782	Intrahepatic cholangpcarcinoma	2017-05-16	female	55	7.7	42	109	171	<0.5	10.4	2.1	1.6	245.5	(-)0.414	159.4	(-)0.088	(-)1.47	(+)0.067	(－)negative	(－)negative	(－)negative	(－)negative	0	0	0	1	5	0	289	1	223	17.6	55.2	26.7	44.4	9.2	282	883	710	147	427	4.8
1103011	Hepatocarcinoma	2018-03-13	male	72	11.1	35	32	49	43	12.6	153.6	2.9	19.9	(+)7258	<2.0	(+)16.01	(-)1.20	(+)0.009	(－)negative	(－)negative	(－)negative	(－)negative	0	0	0	1	3	0	35	0	35	15.6	61.2	22.6	37.1	23.1	137	539	326	203	199	1.6
1109306	Hepatocarcinoma	2018-04-08	male	52	39.3	43	14	22	42	11.9	32.4	4.1	41.8	(+)7243	<2.0	(-)0.114	(+)0.004	(+)0.010	(－)negative	(－)negative	(－)negative	(－)negative	0	0	0	1	2.2	0	766	1	607	7	70.9	21.2	31	27.5	53	544	238	211	163	1.1
942645	Hepatocarcinoma	2016-01-04	male	42	9.6	42	21	20	40	11.6	2508	2.2	5.9	(+)7224	<2.0	(-)0.095	(+)0.005	(+)0.009	(－)negative	(－)negative	(－)negative	(－)negative	0	0	1	1	8.5	1	444	1	444	12	76	11	51	20	156	988	663	260	143	2.6
1104767	Hepatocarcinoma	2018-03-20	male	56	12.5	44	26	24	47	12.3	2243	7.3	39	(+)7172	<2.0	(-)0.582	(+)0.704	(+)0.009	(－)negative	(－)negative	(－)negative	(－)negative	0	0	0	2	2.5	0	883	1	883	12.7	72.5	13.7	38.5	20.1	130	739	393	205	140	1.9
1027336	Hepatocarcinoma	2017-03-21	male	68	10.8	40	36	71	5.2	11.8	11.7	1.1	6.8	(+)716.2	<2.0	(-)0.095	(+)0.002	(+)0.008	(－)negative	(－)negative	(－)negative	(－)negative	0	0	0	2	2.5	0	1857	0	1857	25	67.7	6	54.7	11.8	725	1963	1586	342	174	4.6
1097667	Hepatocarcinoma	2018-02-06	female	51	13.2	50	14	14	16	11.3	50.7	1.3	2.6	(+)7158	<2.0	(-)0.083	(+)0.047	(+)0.008	(－)negative	(－)negative	(+)positive	(－)negative	0	0	0	1	1.5	0	1379	0	1379	6.9	75.7	16.8	38.9	29.9	66	724	372	287	160	1.3
1040864	Intrahepatic cholangpcarcinoma	2017-05-24	female	57	8.1	47	13	17	43	10.2	5.2	1.2	16.5	(-)0.440	3.7	(-)0.093	(-)1.70	(-)1.46	(－)negative	(－)negative	(－)negative	(－)negative	0	0	0	13	5	1	601	1	285	25.9	60	10.6	41.6	15.1	285	660	458	166	117	2.8
1100575	Hepatocarcinoma	2018-02-26	male	71	16.9	48	22	29	20	10.6	9	1.9	10.3	(+)7153	<2.0	(-)0.090	(+)0.009	(+)0.008	(－)negative	(－)negative	(+)positive	(－)negative	0	0	0	1	8	0	1613	0	1613	5.4	77.4	16.6	34.7	31.2	95	1363	611	549	292	1.1
1103483	Hepatocarcinoma	2018-03-14	female	63	10	44	22	22	16	11.1	1.5	3.1	20.6	(+)7134	<2.0	(-)0.104	(+)0.003	(+)0.009	(－)negative	(－)negative	(－)negative	(－)negative	0	0	0	1	3	0	1578	0	1578	18.5	67.7	13.3	43.6	21	199	727	468	226	143	2.1
1099887	Hepatocarcinoma	2018-02-26	male	50	4.5	42	18	19	22	11.7	1	4.1	5.1	(+)7125	<2.0	(-)0.524	(-)1.23	(+)0.008	(－)negative	(－)negative	(－)negative	(－)negative	0	0	0	1	3	0	242	1	206	11	63.1	24.6	42.7	15.9	190	1087	735	274	425	2.7
1043607	Intrahepatic cholangpcarcinoma	2017-06-07	female	81	13.1	45	10	41	52	11.7	4.4	2.9	163.3	(-)0.551	<2.0	(-)0.093	(-)1.64	(-)2.03	(－)negative	(－)negative	(－)negative	(－)negative	0	0	0	3	12	0	1253	0	1253	6.5	51.4	41.7	33.3	17.6	78	617	400	211	500	1.9
1093352	Hepatocarcinoma	2018-01-18	male	52	10.5	49	25	21	109	10.1	38.8	7.3	35.6	(+)7104	9.2	(+)5.16	(-)1.20	(+)0.008	(－)negative	(－)negative	(－)negative	(－)negative	0	0	1	1	7	1	917	1	178	12.2	63.9	19	35.9	30	194	1015	570	477	301	1.2
1044402	Intrahepatic cholangpcarcinoma	2017-06-12	female	69	17.7	47	17	24	51	10.8	2.7	3.3	219.3	-0.391	<2	-0.089	-1.55	-2.16	(-)negative	(-)negative	(-)negative	(-)negative	0	0	0	1	7	0	1301	1	756	10.4	82.9	6.1	59.2	17.6	73	580	414	123	43	3.4
1110088	Hepatocarcinoma	2018-04-10	female	61	16.2	45	29	23	42	11.8	5.3	1.5	17	(+)71.89	<2.0	(-)0.110	(+)0.010	(+)0.011	(－)negative	(－)negative	(－)negative	(－)negative	0	0	0	1	2.1	0	1581	0	1581	14.3	76.3	7.5	35.6	33.5	284	1512	704	663	148	1.1
1109758	Hepatocarcinoma	2018-04-10	male	67	23.6	39	77	57	310	11.1	18.5	1.9	55	(+)7093	<2.0	(-)0.396	(-)1.69	(+)0.009	(－)negative	(－)negative	(－)negative	(－)negative	0	0	1	1	2.8	0	1309	0	1309	13	67.2	17.5	36.5	28.6	206	1066	578	454	277	1.3
1061927	Hepatocarcinoma	2017-08-29	male	42	13	42	18	18	14	11.4	1573	0.6	5.3	(+)7046	<2.0	(-)0.987	(-)1.17	(+)0.009	(－)negative	(－)negative	(－)negative	(－)negative	0	0	0	2	2.3	0	1744	1	120	12.9	81	5.2	42.9	34.5	284	1782	944	759	114	1.2
1053827	Hepatocarcinoma	2017-07-20	male	43	11.5	49	41	36	34	10	206.4	2.7	35.8	(+)7005	<2.0	(-)0.095	(+)0.097	(+)0.008	(－)negative	(－)negative	(+)positive	(－)negative	0	0	0	2	2.6	0	33	0	33	12	62.3	24.6	34.3	25.3	144	748	412	304	295	1.4
1110067	Hepatocarcinoma	2018-04-11	male	56	12.7	41	31	21	46	11.1	12.1	5.7	11.2	(+)6992	<2.0	(-)0.113	(+)0.003	(+)0.010	(－)negative	(－)negative	(－)negative	(－)negative	0	0	0	1	8	0	935	1	369	12.3	75.3	11.2	50.3	21.3	267	1635	1092	463	244	2.4
1099738	Hepatocarcinoma	2018-02-26	male	55	27.2	43	15	17	14	14	731	1.9	8.1	(+)6980	<2.0	(-)0.122	(+)0.002	(+)0.008	(－)negative	(－)negative	(+)positive	(－)negative	0	0	0	2	4.5	0	1456	1	108	8.8	85.7	3.4	49.9	32.1	113	1102	641	413	44	1.6
1077095	Hepatocarcinoma	2017-11-07	male	51	16	49	88	37	244	10.5	2.3	5.8	11.5	(+)6978	<2.0	(-)0.120	(+)0.008	(+)0.010	(－)negative	(－)negative	(－)negative	(－)negative	0	0	0	8	7.7	0	1108	0	1108	11.7	80.9	6.9	35.5	37.5	105	728	320	338	62	0.9
1109629	Hepatocarcinoma	2018-04-08	male	52	14.4	41	24	33	39	12.4	89.3	4.9	10.1	(+)6972	<2.0	(+)1.97	(-)1.46	(+)0.009	(－)negative	(－)negative	(－)negative	(－)negative	0	0	0	1	3	0	715	0	715	10.9	67.5	20.7	32.8	24.6	113	697	339	254	214	1.3
1104237	Hepatocarcinoma	2018-03-15	male	52	7.3	43	23	26	52	11.3	56.9	1.2	9.1	(+)6951	<2.0	(-)0.105	(+)0.003	(+)0.010	(－)negative	(－)negative	(－)negative	(－)negative	0	0	0	3	8	1	247	1	247	17.3	68.8	12.5	44.6	22.7	242	962	624	317	174	2
1071011	Hepatocarcinoma	2017-10-13	male	59	7.5	46	23	23	63	10.8	622.7	2.7	12.6	(+)6924	10.7	(-)0.116	(+)0.003	(+)0.010	(－)negative	(－)negative	(－)negative	(－)negative	0	0	0	3	4	0	1076	1	334	6.4	69.9	54.1	35.6	33.1	128	1398	712	662	444	1.1
1100916	Hepatocarcinoma	2018-03-01	male	36	9.2	41	13	16	11	12.2	18	0.9	7.6	(+)6909	<2.0	(-)0.106	(+)0.003	(+)0.009	(－)negative	(－)negative	(－)negative	(－)negative	0	0	0	1	2.8	0	986	0	986	10.8	80.4	6.8	46.3	30.2	152	1128	649	424	95	1.5
1026390	Hepatocarcinoma	2017-03-16	male	61	11.3	50	21	30	48	11.3	9.9	8.2	156.7	(+)6897	<2.0	(+)28.64	(-)1.45	(+)0.007	(－)negative	(－)negative	(－)negative	(－)negative	0	0	0	3	2.5	0	1958	1	250	10.9	79.1	9.7	50.9	23.7	131	949	611	284	116	2.1
1107243	Hepatocarcinoma	2018-03-27	male	55	24	46	30	30	62	12.6	17.4	3.2	49.4	(+)6892	<2.0	(+)7.05	(-)1.53	(+)0.009	(－)negative	(－)negative	(－)negative	(－)negative	0	0	0	1	3.5	0	367	1	356	7.7	77.5	14.4	37.2	23	85	858	412	255	160	1.6
1107445	Hepatocarcinoma	2018-03-29	male	50	11.7	46	31	20	23	10.7	3.3	1	11	(+)6889	<2.0	(+)1.23	(-)1.60	(+)0.011	(－)negative	(－)negative	(－)negative	(－)negative	0	0	0	2	2.5	0	1330	1	1286	11.3	68.5	19.3	46.5	23.4	177	1075	730	368	303	2
1051234	Intrahepatic cholangpcarcinoma	2017-07-14	male	60	10.1	41	89	92	227	10.4	2.4	4.6	2118	(-)0.367	2.2	(-)0.090	(+)0.002	(+)0.007	(－)negative	(－)negative	(－)negative	(－)negative	0	0	0	1	9	0	78	0	78	24.6	62	11.2	49	12	492	1240	980	240	224	4.1
1079405	Hepatocarcinoma	2018-01-25	male	53	8.2	43	160	85	154	11.4	3.5	4.3	11.1	(+)6862	<2.0	(+)116.0	(-)1.35	(+)0.009	(－)negative	(－)negative	(－)negative	(－)negative	0	0	0	3	3.5	0	1455	1	1446	8.4	80.1	9.8	41.4	27.4	173	1653	854	565	202	1.5
1102403	Hepatocarcinoma	2018-03-12	male	35	13.3	45	47	26	33		7608	1.7	4.5	(+)6860	<2.0	(-)0.097	(+)0.003	(+)0.010	(－)negative	(－)negative	(－)negative	(－)negative	0	0	0	1	3	0	962	0	962	28.4	56	15	32.1	19.6	616	1215	695	425	325	1.6
1052678	Intrahepatic cholangpcarcinoma	2017-07-18	male	48	19.7	46	88	36	216	12.1	4.4	2	8.7	(+)6899	<2.0	(+)15.45	(-)1.12	(+)0.008	(－)negative	(－)negative	(－)negative	(－)negative	0	0	0	1	6	0	1208	1	414	7.1	70.8	20.2	43.3	22.8	85	850	520	274	242	1.9
1101247	Hepatocarcinoma	2018-03-01	male	40	11.9	50	23	21	90	11.8	73.9	1.3	17.3	(+)6856	<2.0	(-)0.093	(+)0.003	(+)0.008	(－)negative	(－)negative	(－)negative	(－)negative	0	0	0	2	2	0	1184	0	1184	6.6	83	10	32.5	38.9	134	1698	666	795	204	0.8
1053238	Intrahepatic cholangpcarcinoma	2017-07-31	male	66	7.8	40	65	113	157	10.2	2	39.4	3316	(+)878.1	<2.0	(-)0.095	(+)0.003	(+)0.008	(－)negative	(－)negative	(+)positive	(－)negative	0	0	0	3	5	0	515	0	515	7.4	74.6	17.3	47.2	24.2	111	1119	708	363	260	2
1058627	Hepatocarcinoma	2017-08-18	male	52	8.5	33	30	33	55	11.5	1058	3.5	18.6	(+)6855	<2.0	(-)0.095	(+)0.054	(+)0.008	(－)negative	(－)negative	(+)positive	(－)negative	0	0	1	1	3	1	30	1	30	29.4	55.7	13.4	37.5	16.4	941	1782	1200	525	429	2.3
1055350	Hepatocarcinoma	2017-07-28	male	38	25.6	48	42	27	75	11.2	2.3	3.3	38.6	(+)6853	<2.0	(-)0.099	(+)0.908	(+)0.009	(－)negative	(－)negative	(－)negative	(－)negative	0	0	0	2	5	0	35	0	35	10.5	65.1	23.4	33.7	27.9	273	1693	876	725	608	1.2
1106898	Hepatocarcinoma	2018-03-27	male	65	11.8	51	29	26	50	13.1	10.8	2.6	<0.6	(+)6821	<2.0	(-)0.121	(+)0.060	(+)0.010	(－)negative	(－)negative	(－)negative	(－)negative	0	0	0	1	5	0	1184	1	223	4.7	82.6	12.4	26.7	55.7	95	1671	540	1128	251	0.5
1101136	Hepatocarcinoma	2018-03-01	male	43	23	39	31	27	32	12.2	2947	4.1	43.2	(+)6817	<2.0	(+)6.67	(-)1.08	(+)0.008	(－)negative	(－)negative	(－)negative	(－)negative	0	0	0	1	4	0	1605	0	1605	8.3	77.3	13.8	48.7	25.8	189	1753	1106	585	314	1.9
1095627	Hepatocarcinoma	2018-02-01	female	64	17.6	49	63	46	49	10.7	73.2	1	14	(+)6816	<2.0	(-)0.088	(+)0.003	(+)0.008	(－)negative	(－)negative	(－)negative	(－)negative	0	0	0	1	1.5	0	1588	0	1588	17.3	65.5	15.2	38.4	24.5	168	636	373	238	148	1.6
1102275	Hepatocarcinoma	2018-04-08	male	54	20.9	35	77	86	217	12.1	49.5	3.1	19.4	(+)6801	<2.0	(-)0.101	(+)0.003	(+)0.010	(－)negative	(－)negative	(－)negative	(－)negative	0	0	0	1	16	0	1592	0	1592	4.4	59	34.8	36.5	20.7	30	404	250	142	239	1.8
1074872	Hepatocarcinoma	2018-01-22	male	52	18.4	47	69	31	106	10.3	6.5	2.9	8.8	(+)680.4	<2.0	(-)0.110	(+)0.002	(+)0.008	(－)negative	(－)negative	(－)negative	(－)negative	0	0	0	1	2.8	0	232	1	169	11.2	58.5	28.9	26.4	28.5	216	1122	506	547	553	0.9
1104194	Hepatocarcinoma	2018-03-20	male	56	8	37	57	44	246	12.6	64.7	6.1	<0.6	(+)6788	<2.0	(-)0.102	(+)0.003	(+)0.009	(－)negative	(－)negative	(+)positive	(－)negative	0	0	0	1	3	0	1651	1	1051	18.6	72.6	8.1	37	33.2	193	754	384	345	84	1.1
1081360	Hepatocarcinoma	2017-12-01	male	57	11.5	46	90	40	195	10.7	46.9	2.8	53.1	(+)6783	<2.0	(-)0.148	(+)0.048	(+)0.011	(－)negative	(－)negative	(－)negative	(－)negative	0	0	0	2	5	0	1754	0	1754	10.1	82.2	7	43.9	36.8	132	1074	574	481	92	1.2
1065170	Hepatocarcinoma	2017-09-12	male	65	12.7	48	71	30	115	12	5.4	3.5	9.7	(+)6720	34.6	(-)0.106	(+)0.006	(+)0.008	(－)negative	(－)negative	(－)negative	(－)negative	0	0	0	3	8	0	1366	1	184	11	64.3	23.5	47.9	14.4	209	1222	910	274	447	3.3
1108091	Hepatocarcinoma	2018-04-02	male	65	20.6	36	5	32	52	14.7	2.7	3	15.5	(+)6714	<2.0	(-)0.647	(-)1.46	(+)0.009	(－)negative	(－)negative	(－)negative	(－)negative	0	0	0	2	4.7	0	30	0	30	19.5	69.3	8.8	44.2	20.8	124	439	280	132	56	2.1
1104809	Hepatocarcinoma	2018-03-19	male	49	24.2	45	19	17	46	11	7577	7.7	<0.6	(+)6713	<2.0	(+)5.49	(-)1.24	(+)0.009	(－)negative	(－)negative	(－)negative	(－)negative	0	0	0	1	3.5	0	35	0	35	8.7	66.3	24.6	40.2	25.1	94	719	436	272	266	1.6
1088587	Hepatocarcinoma	2017-12-25	male	59	14.8	34	90	478	201	13.1	15.7	2.9	40.6	(+)6709	<2.0	(+)6.00	(-)1.04	(+)0.008	(－)negative	(－)negative	(－)negative	(－)negative	0	0	0	4	2	0	1758	0	1758	19.4	73.2	6.3	50.5	18.6	218	821	566	209	71	2.7
1047655	Hepatocarcinoma	2017-06-23	male	42	18.6	47	68	52	177	12.6	51.9	1	10.4	(+)6682	<2.0	(-)0.084	(+)0.002	(+)0.006	(－)negative	(－)negative	(－)negative	(－)negative	0	0	0	5	4	0	1032	0	1032	19.2	68.6	9.9	38.1	23.9	269	960	533	335	139	1.6
1093698	Hepatocarcinoma	2018-01-18	male	60	13.7	51	42	25	52	13	2.5	4.3	11.6	(+)6659	93.9	(-)0.169	(-)1.03	(+)0.008	(－)negative	(－)negative	(－)negative	(－)negative	0	0	0	1	4.8	0	1737	0	1737	8.1	64.1	27	33.1	25	75	591	305	230	249	1.3
1088467	Hepatocarcinoma	2017-12-28	male	46	24	39	95	451	203	10.4	>60500.0	4.2	49.5	(+)6646	<2.0	(+)40.78	(-)1.33	(+)0.008	(－)negative	(－)negative	(－)negative	(－)negative	0	0	0	2	15	0	307	0	307	7.8	77.8	13.2	32.8	42.7	97	969	408	532	165	0.8
1090158	Hepatocarcinoma	2018-01-02	male	44	14.1	49	25	18	28	10.1	38.1	1	14.3	(+)6641	<2.0	(+)2.19	(-)1.20	(+)0.008	(－)negative	(－)negative	(+)positive	(－)negative	0	0	0	1	4.8	0	1471	0	1471	10	68.4	19.6	30.8	35.3	204	1397	628	721	401	0.9
1044640	Hepatocarcinoma	2017-06-13	female	54	21.8	40	19	34	44	11.9	39.6	0.4	6	(+)6633	<2.0	(-)0.093	(+)0.002	(+)0.007	(－)negative	(－)negative	(－)negative	(－)negative	0	0	1	2	8	0	120	0	120	15.2	70.2	13.1	34	32.5	167	772	374	358	144	1
940818	Hepatocarcinoma	2018-01-29	male	26	4.6	44	21	19	25	10.5	2.9	2.5	3.5	(+)6600	<2.0	(+)11.78	(-)1.23	(+)0.008	(－)negative	(－)negative	(－)negative	(－)negative	0	0	0	1	1	0	1723	0	1723	15.1	68.1	16.6	37.2	28	300	1354	741	557	330	1.3
1040508	Hepatocarcinoma	2017-05-26	female	49	9.1	46	103	12	1.9	10.9	346.9	1.7	8.6	(+)6577	6.8	(-)0.086	(+)0.002	(+)0.006	(－)negative	(－)negative	(－)negative	(－)negative	0	0	0	3	1	0	1931	0	1931	10.7	79.4	9.4	44.9	28.5	161	1191	674	428	141	1.6
1104647	Hepatocarcinoma	2018-03-15	male	56	14	33	43	35	161	13.7	18.4	1.8	32.9	(+)6561	6	(-)0.755	(+)0.707	(+)0.009	(－)negative	(－)negative	(+)positive	(－)negative	0	0	0	1	3	0	858	1	77	18.4	69.7	11.6	47.2	19.9	221	841	570	240	140	2.4
1055702	Hepatocarcinoma	2017-07-28	female	58	15.2	42	118	75	247	12	449.2	1.6	22.2	(+)6523	98.2	(-)0.536	(+)0.687	(+)0.009	(－)negative	(－)negative	(－)negative	(－)negative	0	0	0	1	5	0	844	0	844	16.7	50.3	32.1	31.1	10.6	217	654	404	138	417	2.9
1037203	Hepatocarcinoma	2017-05-05	male	60	12.4	40	34	22	70	11.5	5.5	3.7	29.8	(+)6457	<2.0	(-)0.093	(+)0.003	(+)0.009	(－)negative	(－)negative	(－)negative	(－)negative	0	0	0	2	3.5	0	1395	0	1395	21.3	70.9	7.3	46.5	23.8	426	1418	930	476	146	2
1095842	Hepatocarcinoma	2018-01-29	male	63	8.5	44	55	48	142	11.7	4.6	10.6	41.8	(+)6411	9.2	(-)0.113	(+)0.149	(+)0.008	(－)negative	(－)negative	(+)positive	(－)negative	0	0	0	1	4.5	0	834	1	157	4.7	77.9	16.5	33.7	43.6	77	1285	556	719	272	0.8
1054834	Hepatocarcinoma	2017-07-25	male	55	8.6	40	14	25	166	11.6	2741	2.7	57.1	(+)6407	<2.0	(+)2.50	(-)1.10	(+)0.008	(－)negative	(－)negative	(－)negative	(－)negative	0	0	1	2	3.5	0	751	1	710	15.7	75.7	8	57.2	16.3	188	908	686	196	96	3.5
1098016	Hepatocarcinoma	2018-02-09	male	62	18	44	95	157	64	12.3	108.7	3.6	52.8	(+)6403	<2.0	(-)0.120	(+)0.002	(+)0.009	(－)negative	(－)negative	(－)negative	(－)negative	0	0	0	1	6	0	992	1	521	6.7	41.3	51.5	24	15.3	119	736	427	273	916	1.6
1086538	Hepatocarcinoma	2017-12-19	male	53	11.9	45	89	42	149	10.4	65.9	0.9	7.9	(+)6400	<2.0	(-)0.126	(+)0.341	(+)0.008	(－)negative	(－)negative	(－)negative	(－)negative	0	0	0	2	3.8	0	1060	1	300	8.1	58	33.1	40.5	15.3	175	1246	870	330	711	2.6
1064247	Intrahepatic cholangpcarcinoma	2017-09-14	male	52	11.8	39	42	43	302	11.7	3	3.2	287.7	-0.801	<2	-0.191	-1.403	-2.15	(-)negative	(-)negative	(-)negative	(-)negative	0	0	0	1	10	1	608	1	608	7.6	71.8	19.8	43.4	22.2	91	862	521	266	238	2
1106427	Hepatocarcinoma	2018-03-23	male	55	16.8	44	33	35	94	12.2	748.3	1.6	29.1	(+)6394	<2.0	(+)7.21	(-)1.06	(+)0.009	(－)negative	(－)negative	(－)negative	(－)negative	0	0	0	1	2	0	953	1	468	10.5	62.9	25.7	34.4	24.6	175	1046	573	410	428	1.4
1102401	Hepatocarcinoma	2018-03-08	male	41	7.2	43	22	23	44	11.7	4.3	1.9	10.1	(+)6359	<2.0	(-)0.266	(-)1.35	(+)0.009	(－)negative	(－)negative	(－)negative	(－)negative	0	0	0	2	3.5	0	599	1	546	12.2	81.1	5.8	41.4	31.8	160	1061	542	417	75	1.3
1037801	Hepatocarcinoma	2017-05-10	female	57	12	47	30	28	36	10.8	1.5	1.8	15.3	(+)6345	143.7	(-)0.089	(+)0.002	(+)0.008	(－)negative	(－)negative	(－)negative	(－)negative	0	0	0	2	3	0	1285	0	1285	19.3	73.3	6.5	46.1	26.7	290	1100	692	401	98	1.7
1105912	Hepatocarcinoma	2018-03-23	male	43	23.6	43	54	61	401	12.1	837.1	4.4	<0.6	(+)6316	<2.0	(+)34.44	(+)0.666	(+)0.009	(－)negative	(－)negative	(－)negative	(－)negative	0	0	0	5	15	1	145	1	145	7.5	46.9	43.7	29.5	15.5	88	550	346	182	513	1.9
1057763	Hepatocarcinoma	2017-08-09	male	73	8.2	43	21	26	40	11.1	45.1	15.7	37.4	(+)6312	<2.0	(-)0.093	(+)0.007	(+)0.008	(－)negative	(－)negative	(－)negative	(－)negative	0	0	0	2	4.5	0	1888	0	1192	3.4	82.5	13.2	26.6	31.4	54	1320	426	502	211	0.8
1090992	Hepatocarcinoma	2018-01-09	female	58	8.1	42	39	30	25	10.4	2.7	4.2	37.5	(+)6312	<2.0	(-)0.111	(+)0.003	(+)0.008	(－)negative	(－)negative	(－)negative	(－)negative	0	0	0	1	6	0	101	0	101	7.8	83.5	7.8	53.6	27	63	671	430	217	63	2
1097449	Hepatocarcinoma	2018-03-30	male	35	12	47	39	26	30	11	334.2			(+)6307	<2.0	(-)0.128	(+)0.351	(+)0.010	(－)negative	(－)negative	(－)negative	(－)negative	0	0	0	1	1.3	0	1600	1	130	9.2	68.9	21.2	33.6	31.5	130	978	477	448	302	1.1
1034285	Hepatocarcinoma	2017-04-25	male	49	5.9	39	40	49	68	12.9	6188	3.2	22.8	(+)6306	<2.0	(-)0.097	(+)0.384	(+)0.009	(－)negative	(－)negative	(－)negative	(－)negative	0	0	0	3	4.5	0	2002	1	483	20.4	73.8	5.1	38.5	28.3	265	959	501	368	66	1.4
1096124	Hepatocarcinoma	2018-01-29	male	61	16.3	45	91	88	147	11.5	135.6	4.5	161.9	(+)6282	<2.0	(-)0.079	(+)0.003	(+)0.009	(－)negative	(－)negative	(－)negative	(－)negative	0	0	0	1	1.4	0	1306	0	1306	13.4	66.5	19.1	45.7	20.8	333	1652	1134	516	475	2.2
1032887	Hepatocarcinoma	2017-04-17	male	49	6.9	43	27	23	50	11.1	6.8	3.9	11.8	(+)6273	<2.0	(+)4.96	(-)1.41	(+)0.008	(－)negative	(－)negative	(－)negative	(－)negative	0	0	0	2	2	0	1304	1	881	13.7	76.5	8.5	62.5	14.5	411	2295	1875	435	255	4.3
1102848	Hepatocarcinoma	2018-03-09	female	56	14.3	45	23	27	25	12.8	455.7	1.6	1.1	(+)6270	<2.0	(-)0.097	(+)0.243	(+)0.009	(－)negative	(－)negative	(－)negative	(－)negative	0	0	0	1	4	0	139	0	139	15.9	78.1	5.5	30.9	39.7	161	790	313	402	56	0.8
1064042	Hepatocarcinoma	2017-09-07	male	57	24.3	39	86	55	81	11.6	57.2	5.8	50.4	(+)6225	<2.0	(+)22.63	(-)1.05	(+)0.008	(－)negative	(－)negative	(－)negative	(－)negative	0	0	0	2	2.5	0	788	1	208	12.8	73.3	13	46	28.7	90	513	322	201	91	1.6
1103759	Hepatocarcinoma	2018-03-14	male	66	13.4	36	19	19	19	13.5	2.2	1.3	12.1	(+)6212	<2.0	(-)0.112	(+)0.003	(+)0.009	(－)negative	(－)negative	(－)negative	(－)negative	0	0	0	1	2.2	0	1675	1	432	24	63.4	12	48.1	14.1	193	510	387	113	96	3.4
1074072	Hepatocarcinoma	2017-10-26	male	44	4.6	47	64	54	193	11.9	3672	1.9	11	(+)6194	33.3	(-)0.119	(+)0.230	(+)0.010	(－)negative	(－)negative	(－)negative	(－)negative	0	0	0	2	4	0	742	0	742	9.8	70.8	18.5	42.9	25.8	216	1558	944	568	407	1.7
1089654	Hepatocarcinoma	2018-01-02	male	54	9.3	44	58	35	77	10.4	581.1	3.3	32.2	(+)6176	26.7	(-)0.130	(+)0.003	(+)0.008	(－)negative	(－)negative	(－)negative	(－)negative	0	0	0	2	3	0	79	0	79	10.9	41.5	46.4	24.7	16.4	179	685	408	271	767	1.5
1095447	Hepatocarcinoma	2018-01-30	male	80	8.3	41	20	25	37	10.8	3.1	3.5	<0.6	(+)6161	4.4	(-)0.524	(+)0.915	(+)0.008	(－)negative	(－)negative	(－)negative	(－)negative	0	0	0	2	3	0	1253	1	651	13.2	62.4	22.9	39.8	20.5	281	1323	844	436	486	1.9
1031233	Hepatocarcinoma	2017-04-10	male	60	10.3	44	37	41	65	11.1	375.1	1.3	10.5	(+)6159	<2.0	(+)1.18	(+)0.899	(+)0.008	(－)negative	(－)negative	(－)negative	(－)negative	0	0	1	2	7	0	1315	1	459	9.6	54.9	34.8	35.3	18.7	173	988	635	337	626	1.9
1094602	Hepatocarcinoma	2018-01-23	male	59	10.4	39	30	28	30	11.9	86.7	4.8	10.2	(+)6141	<2.0	(-)0.091	(+)0.086	(+)0.008	(－)negative	(－)negative	(－)negative	(－)negative	0	0	0	1	1.6	0	996	0	996	16.9	79.4	3.1	53.7	23	521	2440	1650	706	96	2.3
1073218	Hepatocarcinoma	2017-10-19	male	50	13.4	42	24	18	38	12.8	211	1.5	12.9	(+)6111	8.7	(+)1.46	(-)1.08	(+)0.009	(－)negative	(－)negative	(－)negative	(－)negative	0	0	0	2	1.8	0	1538	0	1538	18.1	77.1	3.7	48.7	21.8	398	1696	1071	480	81	2.2
889602	Hepatocarcinoma	2015-02-02	male	76	11	35	47	103	93	12	4.4	2.7	28.8	(+)6095	<2.0	(-)0.082	(+)0.003	(+)0.005	(－)negative	(－)negative	(－)negative	(－)negative	0	0	0	1	7	1	309	1	309	11	71	15	40	31	220	1420	800	620	300	1.3
1057708	Hepatocarcinoma	2017-08-09	male	53	9.9	48	20	15	46	11.6	6.1	4	18.6	(+)6071	<2.0	(+)15.54	(-)1.36	(+)0.008	(－)negative	(－)negative	(－)negative	(－)negative	0	0	0	2	2.5	0	127	0	127	10.5	63.4	25	43.2	15.4	158	951	648	231	375	2.8
1073322	Hepatocarcinoma	2017-10-23	male	39	18.2	47	59	47	310	12.4	772.8	2.6	27.9	(+)6064	<2.0	(-)0.425	(+)0.795	(+)0.009	(－)negative	(－)negative	(－)negative	(－)negative	0	0	0	1	12	0	1787	1	265	8.9	60.9	29.3	32.8	24.1	249	1705	918	675	820	1.4
1078842	Intrahepatic cholangpcarcinoma	2017-11-20	female	67	5.6	39	16	25	42	10.6	4.1	2.1	8.5	-0.41	<2	-0.102	0.147	0.01	(-)negative	(-)negative	(-)negative	(-)negative	0	0	0	6	12	1	452	1	452	7.7	77.3	13.7	44.3	24	86	864	495	268	153	1.8
1095966	Hepatocarcinoma	2018-01-31	male	61	13.7	47	125	95	113	11	67.1	3.7	36.5	(+)6054	<2.0	(-)0.085	(+)0.010	(+)0.008	(－)negative	(－)negative	(－)negative	(－)negative	0	0	0	1	4	0	1213	0	1213	7.6	46.2	43.4	19.5	10.7	189	1154	486	268	1084	1.8
1095379	Hepatocarcinoma	2018-01-29	female	33	5.4	39	16	21	20	11.9	329.4	2.3	39.4	(+)6030	<2.0	(-)0.106	(+)0.002	(+)0.009	(－)negative	(－)negative	(－)negative	(－)negative	0	0	0	1	2.5	0	1169	0	1169	17.8	73.8	6.7	44.1	25.3	248	1026	612	352	93	1.7
1056864	Hepatocarcinoma	2017-08-03	male	66	15.1	48	25	28	81	12	20	3.2	31.5	(+)6027	<2.0	(-)0.086	(+)0.200	(+)0.008	(－)negative	(－)negative	(－)negative	(－)negative	0	0	0	2	3.5	0	398	1	145	8.4	79.9	10.9	44.1	31.8	160	1518	838	604	207	1.4
1083265	Hepatocarcinoma	2018-03-08	male	46	8	41	33	27	63	12	1625	1.2	13.8	(+)6001	<2.0	(+)18.55	(-)1.68	(+)0.010	(－)negative	(－)negative	(－)negative	(－)negative	0	0	0	3	8	0	1686	1	1368	4.7	76.5	17.3	35.4	37.5	65	1071	495	525	242	0.9
1069529	Hepatocarcinoma	2017-09-28	male	45	7.8	41	46	40	121	11.6	15.1	3.7	107.2	(+)5956	<2.0	(+)4.68	(+)0.882	(+)0.009	(－)negative	(－)negative	(－)negative	(－)negative	0	0	1	1	4	1	778	1	140	15.9	69.6	13.9	42.9	25.3	302	1322	815	481	264	1.7
1058846	Hepatocarcinoma	2017-08-15	male	59	16.5	50	51	37	429	10.6	38064	3.3	12.9	(+)5945	<2.0	(-)0.099	(+)0.002	(+)0.008	(－)negative	(－)negative	(－)negative	(－)negative	0	0	0	2	8	1	608	1	608	8.9	57.7	32.2	30.6	25.4	142	923	490	406	515	1.2
1047327	Hepatocarcinoma	2017-06-22	male	76	11.5	49	16	23	56	11.1	3.4	1.3	10.6	(+)5924	<2.0	(-)0.091	(+)0.002	(+)0.007	(－)negative	(－)negative	(+)positive	(－)negative	0	0	0	2	4.5	0	1954	1	574	16	65.9	17.6	29.4	34.1	352	1450	647	750	387	0.9
1100854	Hepatocarcinoma	2018-02-28	male	50	5.6	43	11	20	19	11.5	2.3	2	5.7	(+)5918	<2.0	(-)0.218	(-)1.41	(+)0.008	(－)negative	(－)negative	(－)negative	(－)negative	0	0	0	1	1	0	1456	1	679	8.6	81	10.1	60.9	18.5	134	1265	951	288	158	3.3
1084212	Hepatocarcinoma	2017-12-08	male	51	16.1	41	97	56	158	12	36.3	1.8	33.7	(+)5891	<2.0	(-)0.126	(+)0.003	(+)0.010	(－)negative	(－)negative	(－)negative	(－)negative	0	0	0	2	1	0	32	0	32	7.9	77.6	13.5	39.5	36.7	207	2027	1032	960	352	1.1
1102467	Hepatocarcinoma	2018-03-08	male	55	12.3	46	29	28	83	11.5	1.4	1.1	3.9	(+)5887	5.7	(-)0.107	(+)0.347	(+)0.009	(－)negative	(－)negative	(－)negative	(－)negative	0	0	0	3	4.5	0	186	0	186	5.5	81.2	12.7	35.8	35.7	76	1122	494	493	176	1
1106135	Hepatocarcinoma	2018-03-23	male	41	11.2	46	29	31	33	12	10.9	1.6	23.4	(+)5884	6.3	(-)0.564	(+)0.489	(+)0.009	(－)negative	(－)negative	(－)negative	(－)negative	0	0	0	16	6	0	171	0	171	12.2	64.7	22	23.5	30.6	132	699	254	331	238	0.8
1086103	Intrahepatic cholangpcarcinoma	2017-12-15	male	50	11.9	45	95	54	175	11	1.8	2.7	10.8	(+)5769	<2.0	(-)0.110	(+)0.003	(+)0.011	(－)negative	(－)negative	(－)negative	(－)negative	0	0	0	3	6	1	944	1	243	10.6	70.3	18	45.1	22.9	205	1361	873	444	348	2
1025984	Hepatocarcinoma	2017-03-14	male	64	11.9	44	18	17	54	11.5	2	7.2	<0.6	(+)5851	<2.0	(-)0.173	(+)0.142	(+)0.007	(－)negative	(－)negative	(－)negative	(－)negative	0	0	0	1	4.8	0	1924	0	1924	24.6	50.1	24.2	36.2	13	541	1103	796	285	532	2.8
1036788	Hepatocarcinoma	2017-05-04	male	69	8.4	36	28	38	25	13.4	2103	5.9	22.1	(+)5851	<2.0	(-)0.084	(+)0.002	(+)0.008	(－)negative	(－)negative	(－)negative	(－)negative	0	0	0	1	4	0	1931	0	1931	7.8	81.1	10.2	48	24.4	86	892	528	268	112	2
1068341	Hepatocarcinoma	2017-09-26	male	68	5.2	42	28	24	73	10.7	3	2.8	12.1	(+)5797	<2.0	(-)0.081	(+)0.167	(+)0.009	(－)negative	(－)negative	(－)negative	(－)negative	0	0	0	2	3.2	0	1155	1	794	10.5	67.7	20.7	44.6	22.4	221	1422	937	470	435	2
1049792	Hepatocarcinoma	2017-07-05	male	66	19.5	39	72	75	158	11.3	998.3	1	8.4	(+)5746	<2.0	(-)0.093	(+)0.009	(+)0.007	(－)negative	(－)negative	(－)negative	(－)negative	0	0	0	1	10	0	1941	1	194	3.7	86.2	9	45.6	34	33	776	410	306	81	1.3
1065239	Hepatocarcinoma	2017-09-15	male	70	12.6	45	27	33	46	11.7	5.5	3.9	33.9	(+)5736	<2.0	(-)0.094	(+)0.035	(+)0.008	(－)negative	(－)negative	(－)negative	(－)negative	0	0	0	2	4	0	818	0	818	10.1	72.7	16.4	40.9	27.5	232	1672	941	633	377	1.5
1088726	Hepatocarcinoma	2018-03-13	male	63	10.1	44	45	47	97	11.5	24.7	2	19	(+)5726	4.6	(-)0.078	(+)0.002	(+)0.008	(－)negative	(－)negative	(－)negative	(－)negative	0	0	0	1	9	0	1399	0	1399	8	80.1	10.8	46	26.9	142	1429	820	479	193	1.7
1007787	Hepatocarcinoma	2016-12-09	male	55	12.1	40	55	37	66	11.4	34.9	3.7	37.8	(+)5707	<2.0	(+)95.66	(-)1.12	(+)0.005	(－)negative	(－)negative	(－)negative	(－)negative	0	0	0	4	6	0	2087	1	1055	10	69.6	18.2	36.1	30.2	180	1253	650	544	328	1.2
1075912	Hepatocarcinoma	2017-11-07	male	65	13.7	45	140	46	255	11.1	19.6	2.6	36.3	(+)5685	6.5	(-)0.118	(+)0.003	(+)0.010	(－)negative	(－)negative	(－)negative	(－)negative	0	0	0	3	4.5	0	597	0	597	11.2	72.9	15.7	28.5	43.2	347	2260	884	1339	487	0.7
1088861	Intrahepatic cholangpcarcinoma	2018-01-02	female	45	10.1	38	10	14	65	12.7	2.3	3.3	561.5	-0.308	<2	(-)0.106	(-)1.54	0.008	(－)negative	(－)negative	(－)negative	(－)negative	0	0	0	1	7	0	126	0	126	12.3	75.4	10.6	55.1	19.1	134	819	598	207	116	2.9
1102789	Hepatocarcinoma	2018-03-09	female	50	10.4	37	23	31	28	13.2	56.7	0.8	16.8	(+)5656	<2.0	(+)6.03	(-)1.23	(+)0.009	(－)negative	(－)negative	(－)negative	(－)negative	0	0	0	1	1	0	1230	0	1230	20.5	73.6	5.1	52.4	19.8	196	702	501	189	48	2.6
1090011	Hepatocarcinoma	2018-01-04	male	71	17.4	40	31	23	77	11.5	7.4	3.5	41.8	(+)5647	<2.0	(-)0.123	(+)0.003	(+)0.008	(－)negative	(－)negative	(－)negative	(－)negative	0	0	0	1	2.3	0	1653	0	1653	14.4	72.9	12	44.9	26	150	760	468	271	125	1.7
1095724	Hepatocarcinoma	2018-01-26	female	53	12.8	48	20	22	23	12	59.4	1.5	<0.6	(+)5634	<2.0	(-)0.092	(+)0.008	(+)0.008	(－)negative	(－)negative	(－)negative	(－)negative	0	0	0	1	2	0	1674	1	1450	18.4	67.4	13	40.4	31.7	155	567	339	267	109	1.3
1040653	Hepatocarcinoma	2018-01-08	male	31	5.7	53	125	47	29	9.9	2.8	1.4	7.3	(+)5622	<2.0	(-)0.115	(+)0.007	(+)0.008	(－)negative	(－)negative	(－)negative	(－)negative	0	0	0	1	5	0	1740	0	1740	21.9	69	8.3	30.6	32.4	453	1430	634	673	173	0.9
1104422	Hepatocarcinoma	2018-03-19	female	61	11	46	21	33	46	11.4	3144	2.9	28.2	(+)5594	<2.0	(-)0.257	(+)0.822	(+)0.009	(－)negative	(－)negative	(－)negative	(－)negative	0	0	0	1	3	0	1603	1	1266	13.6	75.5	9.6	37.1	30.5	156	865	425	350	110	1.2
1073249	Hepatocarcinoma	2017-10-23	male	39	15.5	45	56	28	173	12.2	2572	2.6	<0.6	(+)5580	<2.0	(-)0.366	(+)0.871	(+)0.010	(－)negative	(－)negative	(－)negative	(－)negative	0	0	0	1	8	0	1767	0	1112	13.1	78.1	7.7	46	28.3	236	1406	828	509	139	1.6
1077745	Hepatocarcinoma	2017-11-10	male	44	12.6	45	25	29	46	10.7	569.1	2.2	17.5	(+)5546	<2.0	(+)13.35	(-)1.42	(+)0.010	(－)negative	(－)negative	(－)negative	(－)negative	0	0	1	3	8.5	1	612	1	612	16.3	67.6	15.5	39.8	18.9	277	1149	677	321	264	2.1
1090744	Intrahepatic cholangpcarcinoma	2018-01-04	male	69	12.6	44	18	21	86	10.6	1265	2	<0.6	(-)0.812	372.1	(+)6.06	(-)1.25	(+)0.008	(－)negative	(－)negative	(－)negative	(－)negative	0	0	0	1	8.5	1	654	1	654	15.1	65.5	18.3	45.6	16.3	311	1348	938	335	377	2.8
1092405	Hepatocarcinoma	2018-01-12	male	37	9.9	46	24	38	149	11.5	4116	0.8	25.4	(+)5531	32.4	(+)61.25	(-)1.23	(+)0.008	(－)negative	(－)negative	(－)negative	(－)negative	0	0	1	12	9	0	361	0	361	23.4	60.8	14.2	35.3	23.3	171	445	258	171	104	1.5
1050884	Hepatocarcinoma	2017-07-11	male	67	7.3	40	25	38	34	12.7	8.5	2.3	38	(+)5510	<2.0	(-)0.091	(+)0.002	(+)0.008	(－)negative	(－)negative	(－)negative	(－)negative	0	0	0	1	4	0	1682	1	1679	26.3	59.4	13.1	34.2	23.8	552	1247	718	500	275	1.4
1029086	Hepatocarcinoma	2017-03-27	male	55	12.6	41	74	45	40	12.3	777.3	1.3	55.4	(+)5492	<2.0	(-)0.466	(-)1.15	(+)0.010	(－)negative	(－)negative	(+)positive	(－)negative	0	0	0	1	4.5	0	2031	1	361	14.9	74.2	10	40.1	29.5	165	818	442	325	110	1.4
983704	Hepatocarcinoma	2016-08-10	male	53	6.1	40	27	32	63	12.4	2737	4.9	1.9	(+)5477	<2.0	(-)0.104	(+)0.012	(+)0.005	(－)negative	(－)negative	(－)negative	(－)negative	0	0	0	2	8	0	2208	0	1567	11.4	68.4	19.5	37.2	29.6	182	1094	595	474	312	1.3
1026313	Hepatocarcinoma	2017-03-16	male	58	12.8	42	15	27	49	11.9	11.2	5.7	52.5	(+)5446	<2.0	(-)0.098	(+)0.002	(+)0.008	(－)negative	(－)negative	(+)positive	(－)negative	0	0	0	3	8.5	0	1677	1	184	16.4	66.4	14.7	40.8	21.6	230	930	571	302	206	1.9
1032808	Hepatocarcinoma	2017-04-18	male	66	10.1	41	55	100	170	11.4	12.4	3.1	14.3	(+)5350	<2.0	(-)0.092	(+)0.002	(+)0.009	(－)negative	(－)negative	(－)negative	(－)negative	0	0	0	1	20	1	804	1	318	8.1	67.3	23.6	39.3	26.6	162	1346	786	532	472	1.5
1110102	Hepatocarcinoma	2018-04-11	male	50	14.4	48	15	17	22	11.2	4.9	1.3	5.6	(+)5310	<2.0	(-)0.116	(+)0.004	(+)0.009	(－)negative	(－)negative	(－)negative	(－)negative	0	0	0	2	3	0	561	1	476	16.2	73.1	9.1	35.2	33.3	245	1106	532	503	138	1.1
1091720	Intrahepatic cholangpcarcinoma	2018-01-09	male	35	8	45	25	18	17	10.1	3.3	1.8	4.6	(-)0.436	20	(-)0.117	(-)1.26	(+)0.008	(－)negative	(－)negative	(－)negative	(－)negative	0	0	0	1	1.2	0	1169	0	1169	14.4	75.8	8.1	46.9	25.5	254	1333	824	449	143	1.8
947035	Hepatocarcinoma	2016-02-01	female	53	13.4	35	99	99	15	14.2	5193	1.1	21.8	(+)5308	<2.0	(-)0.074	(+)0.005	(+)0.008	(－)negative	(－)negative	(－)negative	(－)negative	0	0	1	1	3.5	0	1771	0	1771	13	79	5	46	29	234	1422	828	522	90	1.6
1100667	Hepatocarcinoma	2018-03-02	male	39	35.5	51	27	27	19	11.7	2541	3.9	<0.6	(+)5301	<2.0	(-)0.103	(+)0.003	(+)0.009	(－)negative	(－)negative	(－)negative	(－)negative	0	0	0	1	2	0	1609	1	1568	18.8	64.9	12.9	35.3	24.9	185	642	349	246	128	1.4
1061852	Hepatocarcinoma	2017-09-14	male	41	7.2	40	30	38	32	12.7	22.4	1.5	14.4	(+)5290	<2.0	(-)0.085	(+)0.003	(+)0.009	(－)negative	(－)negative	(－)negative	(－)negative	0	0	0	3	12	0	1798	1	669	9.8	84.9	4	51.6	25	147	1274	774	375	60	2.1
1086014	Hepatocarcinoma	2017-12-14	male	42	11.6	50	94	47	193	12.1	38.2	2.2	37.9	(+)5271	<2.0	(+)7.18	(+)0.503	(+)0.011	(－)negative	(－)negative	(－)negative	(－)negative	0	0	0	2	3	0	1719	0	1719	7.1	77.9	13.7	44.2	33	122	1338	760	567	235	1.3
1092540	Intrahepatic cholangpcarcinoma	2018-01-15	female	58	7.7	45	31	23	46	11.2	2	1.4	5.6	(-)0.419	<2.0	(-)0.117	(+)0.987	(+)0.010	(－)negative	(－)negative	(－)negative	(－)negative	0	0	0	1	3	0	681	1	243	19.9	67.6	12	53.7	12.5	352	1198	951	221	213	4.3
1101452	Hepatocarcinoma	2018-03-01	male	43	4.9	43	22	21	19	12.2	29.9	4.1	8.7	(+)5270	<2.0	(+)42.79	(-)1.38	(+)0.008	(－)negative	(－)negative	(－)negative	(－)negative	0	0	0	1	3	0	1649	0	1649	10.5	77.6	11	46.5	25.3	177	1305	782	426	186	1.8
1064136	Hepatocarcinoma	2017-09-07	male	56	9.1	39	60	57	814	11	22.7	4.2	42.3	(+)5245	<2.0	(-)0.122	(+)0.104	(+)0.008	(－)negative	(－)negative	(－)negative	(－)negative	0	0	1	2	7	0	1146	0	1146	19.3	71.8	7.9	50.1	21.9	367	1364	952	416	150	2.3
1086639	Hepatocarcinoma	2017-12-15	male	28	15.9	47	27	28	41	11.5	>60500.0	0.6	5.5	(+)5203	<2.0	(+)7.03	(-)1.43	(+)0.437	(－)negative	(－)negative	(－)negative	(－)negative	0	0	0	1	8	0	1685	0	1685	13	81.3	5.2	45.7	33.7	186	1166	656	484	75	1.4
1061032	Hepatocarcinoma	2017-08-22	male	61	17.6	48	20	19	21	14.1	41.7	2.3	12.4	(+)5088	<2.0	(-)0.114	(+)0.859	(+)0.008	(－)negative	(－)negative	(－)negative	(－)negative	0	0	0	2	5	0	1178	1	313	10	73.5	15.6	43.1	13.8	80	588	345	110	125	3.1
1050840	Hepatocarcinoma	2017-07-14	male	58	25.6	39	115	68	272	10.7	2640	2.2	17.6	(+)508.9	18.7	(-)0.089	(+)0.003	(+)0.008	(－)negative	(－)negative	(+)positive	(+)positive	0	0	0	1	16	0	675	1	63	23.9	66.3	8.8	40.4	23.7	287	796	485	284	106	1.7
1095393	Hepatocarcinoma	2018-01-25	male	46	9.4	48	17	19	32	10.1	96.2	2.1	6	(+)5.60	<2.0	(-)0.093	(+)0.152	(+)0.009	(－)negative	(－)negative	(－)negative	(－)negative	0	0	0	1	4.5	0	998	0	998	15.3	55.9	28.5	19.8	32.9	271	991	351	584	506	0.6
1085459	Hepatocarcinoma	2017-12-14	male	83	8.1	43	103	87	179	11	113.9	2.4	15.5	(+)4937	<2.0	(-)0.116	(+)0.029	(+)0.007	(－)negative	(－)negative	(－)negative	(－)negative	0	0	0	3	4	0	732	1	246	7.6	73.7	17.5	42	31.1	134	1290	735	545	306	1.4
1039263	Hepatocarcinoma	2017-05-17	male	49	26	44	21	27	73	12.3	49.6	1.1	24	(+)4921	<2.0	(-)0.105	(+)0.003	(+)0.009	(－)negative	(－)negative	(－)negative	(－)negative	0	0	0	3	2	0	1986	1	1211	9.7	34.1	55.4	17.5	15.3	378	1330	683	597	2161	1.1
1098519	Hepatocarcinoma	2018-03-29	male	61	10.7	32	36	34	108	12.7	60	2.1	62.4	(+)4888	2.7	(-)0.121	(-)1.33	(+)0.011	(－)negative	(－)negative	(－)negative	(－)negative	0	0	0	6	10	0	30	0	30	8.1	78.8	12.3	27.5	46.8	125	1210	422	719	189	0.6
1093739	Hepatocarcinoma	2018-01-19	male	40	9.2	44	51	26	65	10.8	26.4	4.2	0	(+)4803	<2.0	(-)0.087	(+)0.003	(+)0.008	(－)negative	(－)negative	(－)negative	(－)negative	0	0	0	10	4.5	0	52	0	52	15.3	65.1	16.9	30.2	31.1	280	1194	554	570	310	1
1028097	Hepatocarcinoma	2017-03-23	female	61	10.4	39	21	36	76	11.9	303.4	3.5	36.9	(+)4800	<2.0	(+)1.05	(-)1.12	(+)0.007	(－)negative	(－)negative	(－)negative	(－)negative	0	0	0	2	3.2	0	1509	0	1509	28	63.5	8	37.1	24.6	196	445	260	172	56	1.5
1099821	Hepatocarcinoma	2018-02-24	male	64	14.5	45	26	27	27	12.3	499	0.9	9.4	(+)476.7	10.9	(-)0.115	(+)0.002	(+)0.008	(－)negative	(－)negative	(－)negative	(－)negative	0	0	0	1	4.5	1	463	1	123	6.7	79.8	12.3	54.1	24.5	130	1551	1052	476	239	2.2
1063205	Hepatocarcinoma	2017-09-06	male	45	9.4	37	55	69	184	11.3	1679	2.2	69	(+)475.5	265.6	(+)5.63	(-)1.01	(+)0.009	(－)negative	(－)negative	(－)negative	(－)negative	0	0	0	3	11	1	739	1	39	16.2	70.2	11.7	52.2	16.3	356	1544	1148	359	257	3.2
1094609	Intrahepatic cholangpcarcinoma	2018-01-22	male	65	21.4	43	10	14	40	11.6	3.4	0.6	6.7	(-)0.337	128.2	(-)0.087	(+)0.007	(+)0.007	(－)negative	(－)negative	(－)negative	(－)negative	0	0	0	1	6	1	783	1	676	4.5	84.1	10.1	42.7	40.9	57	1064	541	517	128	1
1096964	Hepatocarcinoma	2018-02-01	male	72	9.8	41	55	61	69	12	0.9	2.3	12.1	(+)474.2	32.5	(-)0.112	(+)0.002	(+)0.008	(－)negative	(－)negative	(－)negative	(－)negative	0	0	0	1	5	0	993	0	993	13.6	72.7	12.9	47.8	22.8	182	969	637	304	172	2.1
1095006	Intrahepatic cholangpcarcinoma	2018-03-13	female	55	9.3	38	10	16	55	12.6	2.8	15.6	491.7	(-)0.488	>1000.0	(-)0.099	(+)0.085	(+)0.008	(－)negative	(－)negative	(－)negative	(－)negative	0	0	0	1	9.5	0	846	1	363	9.1	67	22.2	30.9	37.8	137	1004	462	567	332	0.8
1108108	Hepatocarcinoma	2018-03-29	male	57	12	37	40	34	53	12.2	6286	1.9	28.5	(+)4709	12.1	(+)3.62	(-)1.43	(+)0.010	(－)negative	(－)negative	(－)negative	(－)negative	0	0	0	3	6	0	1335	1	489	17.7	70.6	10.8	46.7	22.2	332	1323	875	417	202	2.1
1055052	Hepatocarcinoma	2017-07-27	male	58	16.1	47	23	37	76	11.5	4.7	1	9.4	(+)4577	<2.0	(-)0.109	(+)0.122	(+)0.009	(－)negative	(－)negative	(－)negative	(－)negative	0	0	0	1	6.5	0	1819	0	1197	1.5	69.2	28.5	28.1	34.4	24	1107	450	550	456	0.8
1072048	Hepatocarcinoma	2017-10-18	male	69	14.8	40	45	59	64	13.3	84.4	5.4	71.2	(+)4557	12.8	(+)209.3	(+)0.812	(+)0.009	(－)negative	(－)negative	(－)negative	(－)negative	0	0	0	4	2.5	0	1834	1	485	16	74.8	8.3	52.5	19.9	176	823	578	219	91	2.6
1095274	Hepatocarcinoma	2018-01-26	male	61	10.3	50	37	44	84	10.8	432.6	8.8	42	(+)448.5	573.7	(+)23.78	(-)1.15	(+)0.009	(－)negative	(－)negative	(－)negative	(－)negative	0	0	0	12	10	0	1663	0	1663	25.9	53.7	18.5	38.5	12.8	250	519	372	124	179	3
1092389	Hepatocarcinoma	2018-01-15	male	49	9.2	50	20	20	19	10.5	234.6	2.2	13.8	(+)4466	<2.0	(-)0.214	(-)1.12	(+)0.008	(－)negative	(－)negative	(－)negative	(－)negative	0	0	0	1	1.5	0	984	0	984	6.1	61.6	31.2	29.2	27.1	82	822	389	362	417	1.1
1071896	Hepatocarcinoma	2018-01-05	male	75	17.4	35	47	63	93	11.7	37.2	2	8.4	(+)4460	<2.0	(-)0.118	(+)0.003	(+)0.008	(－)negative	(－)negative	(+)positive	(－)negative	0	0	0	1	9	0	1512	1	375	12.6	74.9	11.8	53.3	19.6	94	558	397	146	88	2.7
1082661	Hepatocarcinoma	2017-12-01	male	74	19.5	39	96	145	158	11.4	396.7	2.3	38.6	(+)4281	<2.0	(-)0.121	(+)0.003	(+)0.010	(－)negative	(－)negative	(+)positive	(－)negative	0	0	0	2	3.5	0	1337	0	1337	11.5	68.1	19.3	38	28.2	153	907	507	376	258	1.3
1031737	Hepatocarcinoma	2017-04-13	male	58	17	43	31	30	39	10.3	236.6	2.8	20.5	(+)4193	4.9	(-)0.091	(-)1.01	(+)0.008	(－)negative	(－)negative	(－)negative	(－)negative	0	0	0	1	2	0	1642	0	1642	12.9	56.6	28.8	35.2	18.5	194	849	528	278	432	1.9
1102806	Hepatocarcinoma	2018-03-08	male	66	7.7	39	111	73	159	11.5	5.3	3.1	21	(+)4181	<2.0	(-)0.097	(+)0.003	(+)0.010	(－)negative	(－)negative	(－)negative	(－)negative	0	0	0	2	2.4	0	644	0	644	7	80.2	9.8	53.1	26.2	101	1154	764	377	141	2
1091449	Hepatocarcinoma	2018-01-08	male	63	13.4	42	25	22	16	11.2	2.8	2.3	26.9	(+)4132	<2.0	(-)0.105	(+)0.003	(+)0.008	(－)negative	(－)negative	(－)negative	(－)negative	0	0	0	1	2.5	0	1445	1	1426	22.6	60.4	15.6	43.9	12.5	377	1006	730	209	260	3.5
1059655	Hepatocarcinoma	2017-08-17	male	54	13.8	48	18	18	51	12.9	3	1.8	8	(+)4064	<2.0	(-)0.096	(+)0.252	(+)0.008	(－)negative	(－)negative	(+)positive	(－)negative	0	0	0	2	3	0	1785	0	1785	14.1	69.1	15.5	39.6	22.5	268	1313	752	428	295	1.8
1047979	Hepatocarcinoma	2017-06-26	male	54	10.5	47	29	27	28	12.2	6.8	1.8	17.5	(+)4032	<2.0	(-)0.083	(+)0.002	(+)0.007	(－)negative	(－)negative	(－)negative	(－)negative	0	0	0	2	2.8	1	627	1	627	12.4	56.3	30.8	27.3	19.1	248	1126	546	382	616	1.4
1096083	Intrahepatic cholangpcarcinoma	2018-01-30	female	62	9.9	43	15	23	36	11.3	3.6	1.5	526.8	(-)0.309	19.4	(-)0.105	(-)1.42	(+)0.045	(－)negative	(－)negative	(－)negative	(－)negative	0	0	0	10	5.5	0	383	0	383	11.6	65.6	21.2	46	18.8	174	987	692	284	319	2.4
1105489	Hepatocarcinoma	2018-03-26	female	51	8.8	41	32	44	82	13.1	2.9	1	16	(+)3965	<2.0	(-)0.104	(+)0.003	(+)0.009	(－)negative	(－)negative	(－)negative	(－)negative	0	0	0	1	10.5	0	1589	0	1589	6.4	84.7	8.5	31.7	21.3	161	2123	796	534	213	1.5
1055312	Hepatocarcinoma	2017-08-01	male	61	22.6	34	12	17	14	14.2	37	2.2	10.5	(+)380.8	10.7	(-)0.705	(-)1.31	(+)0.009	(－)negative	(－)negative	(－)negative	(－)negative	0	0	0	3	1.9	0	1857	0	1857	18.5	67	13.1	51.9	12.1	185	670	519	121	131	4.3
1096691	Intrahepatic cholangpcarcinoma	2018-02-02	male	41	14.5	49	22	22	37	11.9	3.2	2.2	20.4	(-)0.354	>1000.0	(-)0.118	(+)0.047	(+)0.008	(－)negative	(－)negative	(－)negative	(－)negative	0	0	0	1	3.5	0	1683	0	1683	10.3	73.8	14.6	39.4	33.7	162	1157	618	528	228	1.2
1096900	Intrahepatic cholangpcarcinoma	2018-02-05	male	45	12	44	13	15	13	11.9	1.7	1.2	4.3	(-)0.418	36.6	(-)0.115	(+)0.112	(+)0.009	(－)negative	(－)negative	(－)negative	(－)negative	0	0	0	1	3.5	0	220	0	220	12.4	75.1	12	53.3	16.8	272	1649	1171	368	263	3.2
1096974	Hepatocarcinoma	2018-02-01	male	52	10.6	43	87	49	108	11.7	6.8	4.5	49.5	(+)3774	6.4	(-)0.100	(+)0.050	(+)0.008	(－)negative	(－)negative	(+)positive	(－)negative	0	0	0	1	3	0	1251	0	1251	21.5	66.4	11.6	36.3	27.4	373	1152	629	475	202	1.3
1104950	Hepatocarcinoma	2018-03-19	male	57	20.3	41	20	21	23	11.7	2.9	2.6	15.7	(+)3764	<2.0	(-)0.104	(+)0.098	(+)0.010	(－)negative	(－)negative	(－)negative	(－)negative	0	0	0	1	1.5	0	361	0	361	11.8	76.8	10.6	50.2	23.3	206	1335	872	405	184	2.2
1058950	Hepatocarcinoma	2017-09-01	male	63	15.7	39	12	15	15	14.5	1.6	1.4	11	(+)3725	18.1	(-)0.095	(+)0.013	(+)0.009	(－)negative	(－)negative	(－)negative	(－)negative	0	0	0	2	3	0	749	0	749	37.1	54.1	7.4	41.3	11.8	742	1082	826	236	148	3.5
1098522	Hepatocarcinoma	2018-02-11	male	61	13.1	41	12	23	35	12	1.4	5.8	22.1	(+)3694	<2.0	(-)0.123	(+)0.004	(+)0.009	(－)negative	(－)negative	(－)negative	(－)negative	0	0	0	1	6.3	0	1027	0	1027	16.7	79.9	3.3	54	24.3	138	660	446	201	27	2.2
1097337	Intrahepatic cholangpcarcinoma	2018-02-07	male	51	10.2	49	12	26	34	10.4	4	7.9	19.3	(-)0.311	8.4	(-)0.095	(-)1.10	(+)0.009	(－)negative	(－)negative	(－)negative	(－)negative	0	0	0	1	3.3	0	1706	1	1462	9.9	50.6	38.2	30.2	19.3	315	1603	955	611	1210	1.6
1079334	Hepatocarcinoma	2017-11-17	male	65	17.8	50	94	40	197	11.4	89.1	4.2	24.4	(+)368.9	151.6	(-)0.170	(+)0.750	(+)0.009	(－)negative	(－)negative	(－)negative	(－)negative	0	0	0	2	4.8	0	1200	1	668	7.6	85.8	6.1	41.5	33.7	125	1408	681	553	101	1.2
1046844	Hepatocarcinoma	2017-06-21	male	43	9.1	47	21	16	96	11.3	1.8	2.9	4.7	(+)36.40	<2.0	(-)0.092	(+)0.002	(+)0.007	(－)negative	(－)negative	(－)negative	(－)negative	0	0	0	2	2	0	1709	0	1709	16.6	77.2	4.7	44.6	26.3	365	1698	981	579	103	1.7
1097600	Intrahepatic cholangpcarcinoma	2018-02-06	male	65	10.7	40	17	21	95	12.3	1.7	4.7	24.2	(-)0.336	16.3	(-)0.094	(-)1.40	(+)0.644	(－)negative	(－)negative	(－)negative	(－)negative	0	0	0	2	8	0	30	0	30	7	67.3	23.7	51.1	15.1	67	643	489	145	226	3.4
1094906	Hepatocarcinoma	2018-01-25	male	52	11.4	40	77	41	93	11.9	15.8	2.8	19.1	(+)3471	17.3	(-)0.085	(+)0.108	(+)0.008	(－)negative	(－)negative	(+)positive	(－)negative	0	0	0	20	10	0	988	1	536	15.1	73.8	9.5	47.5	24.5	294	1434	923	477	184	1.9
1040862	Hepatocarcinoma	2017-05-24	male	59	16.8	43	60	46	0.8	11	341.4	6	11.5	(+)34.83	10.9	(-)0.086	(+)0.003	(+)0.006	(－)negative	(－)negative	(－)negative	(－)negative	0	0	0	1	6.5	0	1969	1	1092	9.8	62.3	27.2	34	28.3	147	935	510	425	408	1.2
1100931	Hepatocarcinoma	2018-03-02	male	44	24.2	45	67	40	25	12	885.8	2.8	23.8	(+)3350	<2.0	(-)0.107	(+)0.003	(+)0.009	(－)negative	(－)negative	(+)positive	(－)negative	0	0	0	1	4.5	0	1560	0	1560	8.7	75.7	13.9	41.1	26.2	106	923	501	320	169	1.6
1052260	Hepatocarcinoma	2017-07-14	male	47	8.8	51	24	21	62	10.3	5.2	3.6	9.9	(+)3315	<2.0	(-)0.101	(+)0.002	(+)0.007	(－)negative	(－)negative	(－)negative	(－)negative	0	0	0	2	3.5	0	1875	1	1397	14.5	75.9	8.9	32.2	37.2	334	1746	741	856	205	0.9
1088048	Hepatocarcinoma	2017-12-22	male	64	30.4	47	84	36	199	12.5	34.5	2.7	15.5	(+)3240	7	(-)0.110	(+)0.003	(+)0.008	(－)negative	(－)negative	(+)positive	(－)negative	0	0	0	2	3	0	1419	0	1419	4.5	78.6	15.3	25.1	48.9	54	944	302	587	184	0.5
1098592	Intrahepatic cholangpcarcinoma	2018-02-09	male	63	11.9	44	23	19	39	11.4	4	3.7	<0.6	(-)0.335	36.3	(-)0.094	(-)1.43	(+)0.661	(－)negative	(－)negative	(－)negative	(－)negative	0	0	0	1	4.5	0	993	1	373	13.5	62.1	20.9	26.3	28.8	102	468	198	217	158	0.9
1095316	Hepatocarcinoma	2018-01-25	male	51	26.8	39	69	40	54	13.8	11.1	0.9	17.2	(+)3232	4.2	(+)16.00	(+)0.537	(+)0.009	(－)negative	(－)negative	(－)negative	(－)negative	0	0	0	1	2	0	412	0	412	19.7	65.4	14.1	37.8	25.9	368	1224	706	484	264	1.5
1086716	Hepatocarcinoma	2017-12-19	male	53	15	47	67	13	153	12.4	107.1	1.8	16.7	(+)3223	<2.0	(-)0.118	(+)0.003	(+)0.008	(－)negative	(－)negative	(－)negative	(－)negative	0	0	0	2	5.5	0	1466	0	1466	15.4	74.7	9	36.8	36	167	809	398	389	97	1
1026477	Hepatocarcinoma	2017-03-16	male	64	13.3	42	24	21	40	11.5	451.9	0.9	5.7	(+)3218	19.1	(-)0.097	(+)0.003	(+)0.008	(－)negative	(－)negative	(－)negative	(－)negative	0	0	0	1	4.5	0	733	0	733	12.1	83.4	4.2	40.3	44.5	230	1585	766	846	80	0.9
1064285	Hepatocarcinoma	2017-09-07	male	46	27.3	42	27	13	29	11.5	52.5	2.7	12.3	(+)3094	<2.0	(-)0.668	(-)1.20	(+)0.009	(－)negative	(－)negative	(+)positive	(－)negative	0	0	0	2	2	0	1861	1	683	10.8	84	4.6	41.3	40.4	238	1848	909	889	101	1
1084204	Hepatocarcinoma	2017-12-08	male	34	9.7	43	97	86	224	11	456.5	2.2	32.9	(+)3083	<2.0	(+)16.08	(-)1.02	(+)0.011	(－)negative	(－)negative	(－)negative	(－)negative	0	0	0	2	6.5	1	835	1	434	10.1	63.9	25.5	36.4	23.5	140	885	504	325	353	1.5
1099788	Intrahepatic cholangpcarcinoma	2018-03-15	male	58	601.9	30	561	374	2079	14	2.1	6.2	88.9	(-)0.424	4.1	(-)0.186	(-)1.19	(+)0.009	(－)negative	(－)negative	(－)negative	(－)negative	1	0	0	1	4	0	229	0	229	6.6	87.8	4.6	43.8	37.7	54	716	358	307	38	1.2
1091434	Hepatocarcinoma	2018-01-09	male	57	14.4	36	81	184	153	10.6	327.1	5.7	59.6	(+)2980	<2.0	(-)0.115	(+)0.006	(+)0.008	(－)negative	(－)negative	(－)negative	(－)negative	0	0	0	1	15	1	938	1	352	13.6	75.4	10.4	52.7	15.5	163	900	628	184	124	3.4
1091133	Hepatocarcinoma	2018-01-08	male	50	19	49	35	44	56	11.2	178.5	2.2	9.3	(+)2906	<2.0	(-)0.120	(+)0.003	(+)0.007	(－)negative	(－)negative	(－)negative	(－)negative	0	0	1	1	8	0	30	0	30	5.4	66.5	27.3	28.7	29.3	92	1126	486	496	463	1
1094172	Hepatocarcinoma	2018-01-22	male	53	14.3	49	36	24	88	10.9	906.4	3.4	34.7	(+)276.0	110.1	(+)23.44	(-)1.34	(+)0.008	(－)negative	(－)negative	(－)negative	(－)negative	0	0	0	1	1	0	36	0	36	15.6	54.5	27.9	35.5	17.9	232	811	529	266	416	2
1108785	Hepatocarcinoma	2018-04-02	male	62	12.8	40	19	19	41	11.7	488.9	2.3	11.9	(+)2750	<2.0	(-)0.716	(-)1.21	(+)0.009	(－)negative	(－)negative	(－)negative	(－)negative	0	0	0	2	3	0	912	0	912	18.3	74.4	6.3	51	17.1	347	1407	963	324	120	3
1038542	Hepatocarcinoma	2017-05-15	male	64	19.2	44	13	25	18	11.8	37.9	1.4	13.7	(+)2740	<2.0	(-)0.097	(+)0.003	(+)0.008	(－)negative	(－)negative	(－)negative	(－)negative	0	0	0	2	1.5	0	1982	0	1982	13.5	63.6	22.4	22.2	28.5	257	1208	422	542	426	0.8
1105649	Hepatocarcinoma	2018-03-23	male	63	17.1	43	39	34	46	12.1	352	1.8	11.3	(+)2696	<2.0	(+)1.35	(-)1.32	(+)0.009	(－)negative	(－)negative	(－)negative	(－)negative	0	0	0	1	3.6	0	171	0	171	18.4	70.9	10	54.5	15.5	273	1050	807	229	148	3.5
1079935	Hepatocarcinoma	2017-11-20	male	68	8.1	49	70	66	44	11.8	3.5	2	27.4	(+)264.4	<2.0	(-)0.107	(+)0.003	(+)0.010	(－)negative	(－)negative	(－)negative	(－)negative	0	0	0	2	2	0	1794	1	974	27.8	47.9	23.6	27.9	18.3	397	685	399	262	337	1.5
1106895	Hepatocarcinoma	2018-03-30	male	73	13.6	47	19	24	22	11.7	2.2	3.6	<0.6	(+)2620	<2.0	(-)0.108	(+)0.003	(+)0.010	(+)1.01	(－)negative	(+)positive	(－)negative	0	0	0	1	4	0	558	1	355	13.4	68.3	17.4	30.4	32.1	74	376	168	177	96	0.9
1099291	Hepatocarcinoma	2018-02-24	male	62	16.3	47	15	22	27	11.4	2	2.4	8	(+)26.25	<2.0	(-)0.096	(+)0.301	(+)0.009	(－)negative	(－)negative	(－)negative	(－)negative	0	0	0	1	3.5	0	902	0	902	5.3	69.7	24.3	45.4	20	93	1235	805	354	430	2.3
1027472	Hepatocarcinoma	2017-04-28	male	59	15	43	18	19	34	13.2	2	3.3	0.6	(+)2555	<2.0	(-)0.092	(+)0.002	(+)0.007	(－)negative	(－)negative	(+)positive	(－)negative	0	0	0	2	4	0	1999	0	1999	21.1	68.9	9.6	41	26.3	317	1034	615	395	144	1.6
1100427	Hepatocarcinoma	2018-03-02	female	69	16.8	44	11	15	20	11.4	5.2	2.3	9.2	(+)2411	<2.0	(-)0.118	(+)0.002	(+)0.008	(－)negative	(－)negative	(－)negative	(－)negative	0	0	0	1	1.6	0	301	0	301	17.3	72.9	8.6	55.2	16	310	1311	992	287	155	3.5
1101410	Intrahepatic cholangpcarcinoma	2018-03-01	male	62	8.5	45	17	22	137	11.5	4.2	6.1	7.2	(-)0.410	75.2	(-)0.104	(-)1.72	(-)1.27	(－)negative	(－)negative	(－)negative	(－)negative	0	0	0	21	7	0	235	1	96	15.3	76.3	7	52.8	19.9	260	1297	897	338	120	2.7
1059011	Hepatocarcinoma	2017-08-16	male	65	13.4	36	35	28	228	11	1408	4.2	12	(+)2292	<2.0	(-)0.095	(+)0.064	(+)0.009	(－)negative	(－)negative	(－)negative	(－)negative	0	0	1	2	10	0	1372	1	69	13.3	72.1	13.6	41.9	28.9	160	865	503	347	163	1.4
1052156	Hepatocarcinoma	2017-07-13	female	65	14.4	46	12	19	13	10.5	8.7	3.4	16.8	(+)2090	<2.0	(-)0.098	(+)0.002	(+)0.008	(－)negative	(－)negative	(－)negative	(－)negative	0	0	0	3	5	0	1212	1	882	11.4	80	7.8	48.1	27.7	137	960	577	332	94	1.7
1101960	Intrahepatic cholangpcarcinoma	2018-03-12	male	50	13.9	46	40	37	82	12.7	76.1	3	9478	(+)5450	<2.0	(-)0.103	(+)0.005	(+)0.009	(－)negative	(－)negative	(－)negative	(－)negative	1	0	0	5	15	0	227	1	152	12.7	73.6	12.1	39	28.1	78	448	238	171	74	1.4
707399	Hepatocarcinoma	2017-10-12	female	62	7.9	43	16	20	24	10.9	250	1.3	8.1	(+)2088	<2.0	(-)0.100	(+)0.003	(+)0.009	(－)negative	(－)negative	(－)negative	(－)negative	0	0	0	2	1.5	0	1791	1	1103	15.4	72.7	10.2	47.4	22	108	509	332	154	71	2.2
968113	Hepatocarcinoma	2016-05-20	male	44	11.9	42	34	34	151	11.4	12	1.9	17.9	(+)1993	<2.0	(+)2.51	(+)0.822	(+)0.008	(－)negative	(－)negative	(－)negative	(－)negative	0	0	0	4	2.5	0	964	1	588	12.4	51	35.3	25.1	23.2	163	669	330	304	464	1.1
1071287	Hepatocarcinoma	2017-10-16	male	65	8.5	45	28	18	46	11.7	4.1	3.4	10.2	(+)19.24	<2.0	(-)0.121	(+)0.364	(+)0.009	(－)negative	(－)negative	(+)positive	(－)negative	0	0	0	2	4.5	0	214	0	214	10.2	61.5	26.5	24.6	31.9	428	2583	1033	1340	1113	0.8
1105186	Hepatocarcinoma	2018-03-20	male	65	9.3	41	69	45	159	11.9	9.9	4.2	274	(+)1744	133.7	(+)269.3	(-)1.90	(+)0.009	(－)negative	(－)negative	(－)negative	(－)negative	0	0	0	2	4	0	1651	1	213	18.6	68	13	48.9	17.7	403	1471	1059	383	282	2.8
1107796	Hepatocarcinoma	2018-04-02	male	59	15.2	46	18	22	28	11.5	2.7	3.1	17.4	(+)1655	<2.0	(-)0.878	(-)1.67	(+)0.011	(－)negative	(－)negative	(－)negative	(－)negative	0	0	0	3	2	0	135	0	135	9.2	82.2	7.7	47.6	30	52	467	270	170	44	1.6
1072171	Hepatocarcinoma	2017-10-16	male	65	20.5	44	22	19	38	11.7	5	3.1	11.3	(+)162.0	<2.0	(-)0.120	(+)0.002	(+)0.009	(－)negative	(－)negative	(－)negative	(－)negative	0	0	0	5	1.5	0	1823	0	1823	10.9	64.6	22.9	36.3	26.9	262	1550	871	646	550	1.3
1104737	Hepatocarcinoma	2018-03-19	male	68	9.8	48	15	22	32	12.6	3	1.9	7	(+)15.54	33.4	(-)0.103	(+)0.008	(+)0.010	(－)negative	(－)negative	(－)negative	(－)negative	0	0	0	1	3	0	1648	0	1648	10.1	67.1	21	24.5	41.1	174	1152	421	706	361	0.6
1095999	Hepatocarcinoma	2018-01-31	male	62	15.9	54	26	26	43	10.6	38.7	3.6	<0.6	(+)15.21	<2.0	(-)0.088	(+)0.003	(+)0.008	(－)negative	(－)negative	(+)positive	(－)negative	0	0	0	1	6.5	0	1489	0	1489	11.7	66.3	21.7	40.8	25	145	827	508	311	270	1.6
1045426	Hepatocarcinoma	2017-06-15	male	40	11.8	44	35	21	88	13.5	97.7	0.9	5.2	(+)1479	<2.0	(-)0.866	(-)1.30	(+)0.007	(－)negative	(－)negative	(－)negative	(－)negative	0	0	1	2	4.5	0	30	0	30	16.2	70.3	12.3	41.2	24.6	194	844	494	295	148	1.7
1054373	Hepatocarcinoma	2017-07-24	male	41	30.3	50	23	21	28	11.7	241.6	5.9	15.6	(+)1453	<2.0	(-)0.101	(+)0.187	(+)0.008	(－)negative	(－)negative	(+)positive	(－)negative	0	0	0	3	2	0	868	0	868	9.4	72	18.1	29.5	35.7	94	720	295	357	181	0.8
1065485	Hepatocarcinoma	2017-09-15	male	49	11.3	48	46	35	70	9.7	207.8	3.5	5.9	(+)1420	100.6	(-)0.219	(+)0.026	(+)0.009	(－)negative	(－)negative	(－)negative	(－)negative	0	0	0	7	4	0	1796	1	31	30.1	54	15.1	39.8	12.2	873	1566	1154	354	438	3.3
1093369	Hepatocarcinoma	2018-01-22	female	46	11.2	48	11	15	10	9.7	43.1	0.6	18.9	(+)134.6	<2.0	(-)0.103	(+)0.003	(+)0.008	(－)negative	(－)negative	(－)negative	(－)negative	0	0	0	1	1.2	0	1711	0	1711	15.3	74.4	7.7	41.9	29	118	575	324	224	59	1.4
1092695	Hepatocarcinoma	2018-01-15	female	58	19.1	51	63	52	88	10.9	34179	1.7	28.1	(+)1300	32.4	(-)0.123	(+)0.003	(+)0.008	(－)negative	(－)negative	(－)negative	(－)negative	0	0	1	1	11	0	1444	0	1444	12.6	65.2	20.8	38.1	24.4	91	473	276	177	151	1.6
1073494	Hepatocarcinoma	2017-10-24	male	63	9.2	43	124	208	225	12.2	12.7	2.6	44.7	(+)123.3	8.9	(-)0.120	(+)0.003	(+)0.010	(－)negative	(－)negative	(－)negative	(－)negative	0	0	0	2	6.5	0	1590	1	1419	18.8	54.2	25.5	37.7	16	263	759	528	224	357	2.4
1092397	Hepatocarcinoma	2018-01-15	female	66	13.3	51	17	25	52	10.1	169.3	2.2	7.4	(+)1.85	13.4	(-)0.126	(+)0.756	(+)0.008	(－)negative	(－)negative	(－)negative	(－)negative	0	0	0	1	2.5	0	1645	0	1645	6.5	79.3	13.1	54.8	22.4	71	862	595	243	142	2.4
1027758	Hepatocarcinoma	2017-03-21	male	57	4.5	38	18	119	7.8	11.5	>60500.0	2.9	6	(-)0.690	67.7	(-)0.097	(+)0.129	(+)0.007	(－)negative	(－)negative	(－)negative	(－)negative	0	1	0	2	12	1	208	1	208	9.9	81.7	5.5	51.9	29.1	139	1144	727	407	77	1.8
1050639	Hepatocarcinoma	2017-07-06	female	67	22.4	42	38	59	97	12.3	4.6	2.3	32.2	(-)0.610	<2.0	(-)0.080	(+)0.886	(+)0.007	(－)negative	(－)negative	(－)negative	(－)negative	0	0	0	2	3.5	0	1912	1	1254	11.8	73	14.1	32.7	35.6	130	803	360	392	155	0.9
1043914	Hepatocarcinoma	2017-06-07	male	56	21.1	42	9	17	35	12.7	61.1	1.5	5.5	(-)0.581	19.4	(-)0.077	(+)0.257	(+)0.007	(－)negative	(－)negative	(－)negative	(－)negative	0	0	0	1	10	1	389	1	338	13.6	69.6	15.7	50	17.9	122	626	450	161	141	2.8
1091020	Hepatocarcinoma	2018-01-05	male	45	16	49	28	23	21	11.8	7.7	1.6	13.2	(-)0.578	<2.0	(-)0.133	(-)1.01	(+)0.008	(－)negative	(－)negative	(+)positive	(－)negative	0	0	0	1	1.6	0	1377	0	1377	11.3	58.1	29.6	31.7	23.9	172	886	484	364	451	1.3
1063273	Hepatocarcinoma	2017-09-01	male	73	10.7	38	47	29	653	11.3	6.8	2.9	15.4	(-)0.562	<2.0	(-)0.120	(-)1.28	(+)0.008	(－)negative	(－)negative	(－)negative	(－)negative	0	0	0	2	2.5	0	962	0	962	17.2	65.4	15.4	44	21.2	172	654	440	212	154	2.1
1091670	Hepatocarcinoma	2018-01-12	male	60	22.2	41	13	40	90	10.9	442	2	21.9	(-)0.560	26.4	(-)0.133	(+)0.610	(+)0.009	(－)negative	(－)negative	(－)negative	(－)negative	0	0	1	1	15	0	1441	1	433	13.1	75.8	10.1	42.3	29.5	97	564	315	219	75	1.4
1103316	Hepatocarcinoma	2018-03-16	male	63	9.7	43	25	23	100	11	2.9	3.5	12.7	(-)0.515	<2.0	(-)0.112	(-)1.71	(-)1.78	(－)negative	(－)negative	(－)negative	(－)negative	0	0	0	1	4.3	0	419	0	419	15.3	69.4	14.9	44	23.8	282	1282	814	440	275	1.8
1095248	Hepatocarcinoma	2018-01-29	male	56	13.4	41	26	22	62	11.7	9.5	0.9	5.8	(-)0.490	8.1	(-)0.113	(+)0.637	(+)0.009	(－)negative	(－)negative	(－)negative	(－)negative	0	0	0	1	6.5	0	143	0	143	14	80.2	5	58.5	16	239	1369	998	274	85	3.7
1039629	Hepatocarcinoma	2017-05-18	male	63	8.3	40	15	18	45	10.7	6.1	2.4	10.2	(-)0.472	<2.0	(-)0.095	(+)0.933	(+)0.006	(－)negative	(－)negative	(－)negative	(－)negative	0	1	0	4	3.5	0	1517	1	1456	12.9	77.3	8.3	35.4	40.5	245	1469	673	770	158	0.9
1104915	Hepatocarcinoma	2018-03-16	male	60	10.1	46	26	24	92	11.5	42.9	2.6	7.2	(-)0.462	<2.0	(-)0.110	(+)0.003	(+)0.009	(－)negative	(－)negative	(－)negative	(－)negative	0	0	0	1	2.5	0	1561	0	1561	18.8	62.7	17.2	46.4	12.1	282	937	693	180	257	3.8
1101832	Hepatocarcinoma	2018-03-12	male	70	8.3	46	57	35	45	10.5	2.5	1.8	14	(-)0.455	<2.0	(-)0.104	(-)1.57	(+)0.900	(－)negative	(－)negative	(+)positive	(－)negative	0	0	0	1	2.3	0	1284	0	1284	27.3	62.1	10.2	38.2	20.4	399	907	557	298	148	1.9
1096902	Hepatocarcinoma	2018-02-06	male	83	16.9	44	20	19	19	12.6	1.4	2.3	12.8	(-)0.454	31.3	(-)0.109	(-)1.15	(+)0.015	(－)negative	(－)negative	(－)negative	(－)negative	0	0	0	3	4.5	0	1309	0	1309	8.8	62.1	27.5	42.5	18.9	58	409	280	125	181	2.2
1033995	Hepatocarcinoma	2017-04-21	female	66	13.1	40	38	75	38	12.1	686.8	2.1	40.9	(-)0.450	<2.0	(-)0.098	(+)0.820	(+)0.010	(－)negative	(+)30.96	(－)negative	(－)negative	0	0	0	3	2	0	354	1	327	11.8	81.2	6.4	43.2	36	95	655	349	290	52	1.2
1104726	Hepatocarcinoma	2018-03-19	male	60	9.9	42	42	31	65	11.7	9.1	1.9	8	(-)0.448	69.6	(-)0.105	(-)1.19	(+)0.009	(－)negative	(－)negative	(－)negative	(－)negative	0	0	0	1	10	0	956	1	1013	10.5	60	28.7	37.5	20.1	155	881	551	295	422	1.9
923746	Hepatocarcinoma	2015-09-09	male	48	9.6	45	31	20	160	10.8	2.2	0.9	3.1	(-)0.444	441.2	(-)0.098	(+)0.008	(+)0.008	(－)negative	(－)negative	(－)negative	(－)negative	0	0	0	1	8	0	1899	1	1026	13	73	12	36	28	195	1095	540	420	180	1.3
1053038	Hepatocarcinoma	2017-07-31	male	49	51.4	44	301	219	1029	9.9	4.6	5.9	282.3	(-)0.444	>1000	(-)0.109	(+)0.037	(+)0.007	(－)negative	(－)negative	(－)negative	(－)negative	0	0	1	1	4	0	1186	0	1186	17.8	64.7	15.9	34.9	28.4	303	1100	593	483	270	1.2
1041966	Hepatocarcinoma	2017-05-26	male	54	19.3	49	73	218	168	10.6	10908	2.5	<0.6	(-)0.429	85.5	(-)0.094	(-)1.48	(+)0.992	(－)negative	(－)negative	(－)negative	(－)negative	0	0	1	2	12	0	1257	0	1257	9.4	70.8	17.9	46.7	18.5	132	991	654	259	251	2.5
1040931	Hepatocarcinoma	2017-05-24	male	60	10.5	41	119	103	248	12.3	54.6	8.6	44.9	(-)0.427	77.2	(-)0.088	(-)1.41	(+)0.197	(－)negative	(+)26.9	(－)negative	(－)negative	0	0	0	2	3	1	721	1	721	14.7	64.4	20.2	32.9	27.1	368	1610	823	678	505	1.2
1057747	Hepatocarcinoma	2017-08-09	female	60	11	45	25	35	31	12	77.4	2.7	30.6	(-)0.415	>1000	(-)0.098	(+)0.070	(+)0.008	(－)negative	(+)46.71	(－)negative	(－)negative	0	0	0	2	5	0	1832	0	1832	9.6	70.6	19	36.6	31.7	173	1271	659	571	342	1.2
1098658	Hepatocarcinoma	2018-02-11	male	72	9.5	46	26	27	18	11	801.2	3.1	19.2	(-)0.401	154.7	(-)0.090	(+)0.655	(+)0.008	(－)negative	(－)negative	(－)negative	(－)negative	0	0	0	1	1.8	0	30	0	30	11.8	75.9	11.2	55.2	17.8	121	780	568	183	115	3.1
1107967	Hepatocarcinoma	2018-03-29	male	69	20	46	16	21	35	11.1	223.8	4.3	17.3	(-)0.398	<2.0	(-)0.118	(-)1.76	(-)1.85	(－)negative	(－)negative	(－)negative	(－)negative	0	0	0	1	10	0	1334	0	1334	10.7	69.2	19.4	29.2	32.7	208	1345	568	635	378	0.9
1083458	Hepatocarcinoma	2017-12-04	male	68	7	39	84	88	160	11.3	40.5	3.1	24.3	(-)0.392	427.1	(-)0.127	(+)0.399	(+)0.010	(－)negative	(－)negative	(－)negative	(－)negative	0	0	0	4	3	0	1072	0	1072	12.7	78.1	8.6	55.6	21.3	210	1293	921	353	142	2.6
1106601	Intrahepatic cholangpcarcinoma	2018-03-27	female	65	8.7	45	9	26	17	11.2	15	2.9	24.9	(-)0.346	<2.0	(-)0.105	(-)1.66	(+)0.010	(－)negative	(－)negative	(－)negative	(－)negative	1	0	0	1	9.5	0	1119	0	949	8	64.6	25.6	36.3	26.9	61	494	278	206	196	1.3
1102947	Hepatocarcinoma	2018-03-09	male	71	12.7	36	25	30	116	12.6	4.6	2.3	17.2	(-)0.392	<2.0	(-)0.090	(+)0.591	(+)0.009	(－)negative	(－)negative	(－)negative	(－)negative	0	0	0	1	6	0	990	1	568	14	67.2	17.9	46.4	17.5	103	494	341	129	132	2.7
1044620	Hepatocarcinoma	2017-06-09	male	81	10.5	37	36	30	439	11.5	3.7	3.4	37.3	(-)0.386	<2.0	(-)0.081	(-)1.44	(+)0.011	(－)negative	(－)negative	(－)negative	(－)negative	0	0	0	3	12	1	616	1	616	9.1	70.5	20	41.9	23.9	100	776	461	263	220	1.8
1099379	Hepatocarcinoma	2018-02-23	male	69	10	38	20	15	31	12.9	4.6	3.3	22.9	(-)0.385	18.5	(-)0.100	(+)0.826	(+)0.009	(－)negative	(－)negative	(－)negative	(－)negative	0	1	0	1	8	0	1441	1	336	2.8	87.3	9.2	40.6	33.9	11	342	159	133	36	1.2
1095234	Hepatocarcinoma	2018-01-26	male	67	12.4	43	38	20	43	9.9	2.6	2.7	17	(-)0.374	39.7	(-)0.122	(+)0.910	(+)0.009	(－)negative	(－)negative	(－)negative	(－)negative	0	0	0	1	2.5	0	1691	0	1691	10.1	78.4	9.7	37.9	35.9	239	1862	899	852	230	1.1
1106928	Hepatocarcinoma	2018-03-27	male	68	13.2	42	27	37	87	11.3	32.1	1.6	23.9	(-)0.371	17.1	(-)0.115	(-)1.07	(+)0.014	(－)negative	(－)negative	(－)negative	(－)negative	0	0	0	1	12	0	1668	1	414	8.3	73.2	17.3	58.5	14.1	100	882	705	170	209	4.1
1091492	Hepatocarcinoma	2018-01-09	male	61	10.7	45	20	46	153	11.4	24.1	2.6	19.5	(-)0.369	<2.0	(-)0.112	(+)0.040	(+)0.009	(－)negative	(－)negative	(－)negative	(－)negative	0	0	0	2	10	0	1158	1	184	7.7	75.1	16	44.8	26.4	106	1034	616	363	220	1.7
1058229	Hepatocarcinoma	2017-08-14	male	51	15.4	40	35	36	91	11.8	4305	1.1	9.7	(-)0.365	12.5	(-)0.092	(+)0.004	(+)0.008	(－)negative	(－)negative	(+)positive	(－)negative	0	1	0	2	12	1	93	1	79	14.9	77.7	6.5	46.7	20.1	253	1321	794	342	111	2.3
1046567	Hepatocarcinoma	2017-06-19	male	60	14.3	43	46	28	28	11.2	2.4	1.8	7.1	(-)0.354	67.2	(-)0.094	(+)0.021	(+)0.007	(－)negative	(－)negative	(+)positive	(－)negative	0	0	0	3	4	0	1316	1	695	13.2	69.3	16.1	52.9	15.3	238	1247	952	275	290	3.5
1109416	Hepatocarcinoma	2018-04-04	male	47	13.1	43	10	18	36	12.2	10122	5.3	29.8	(-)0.334	<2.0	(-)0.106	(+)0.015	(+)0.010	(－)negative	(－)negative	(－)negative	(－)negative	0	0	0	7	6	0	30	0	30	20.3	70.4	9	34.6	28.6	478	1658	816	673	211	1.2
1047646	Hepatocarcinoma	2017-06-22	male	54	12	50	49	26	33	11.4	4.8	4.8	26.5	(-)0.324	28.1	(-)0.094	(-)1.54	(+)0.143	(－)negative	(－)negative	(－)negative	(－)negative	0	0	0	2	3.5	0	1490	0	1490	23.1	46.5	28.2	30.7	14	277	558	368	168	338	2.2
1049838	Hepatocarcinoma	2017-07-05	male	62	16.5	51	69	49	324	11.3	8.9	8.2	42.1	(-)0.319	<2.0	(-)0.093	(-)1.50	(-)1.57	(－)negative	(－)negative	(－)negative	(－)negative	0	0	0	2	3	0	1913	1	771	15.9	72.4	11.3	43.7	28.3	366	1665	1005	651	260	1.5
1093865	Hepatocarcinoma	2018-01-19	male	63	9.6	45	20	31	24	11.6	231.4	5.2	27.1	(-)0.319	<2.0	(-)0.084	(+)0.895	(+)0.008	(－)negative	(－)negative	(－)negative	(－)negative	0	0	0	3	5	0	110	0	110	14.8	60.4	24.1	34.4	18	127	518	294	154	206	1.9
1093372	Hepatocarcinoma	2018-01-22	male	74	13.7	41	23	27	85	11.1	4.8	4.2	22.5	(-)0.303	78.1	(-)0.091	(-)1.60	(-)1.58	(－)negative	(－)negative	(+)positive	(－)negative	0	0	0	1	4	0	140	0	140	14.7	66.7	18	47.3	14.9	123	560	397	125	151	3.2
1109025	Intrahepatic cholangpcarcinoma	2018-04-08	male	20	17.9	49	17	21	14	11.7	2.8	2.4	412.2	(+)757.9	<2.0	(-)0.120	(+)0.004	(+)0.010	(－)negative	(－)negative	(－)negative	(－)negative	0	0	0	1	4	0	549	1	550	11.4	74.2	14.2	23.4	32.5	110	715	225	313	137	0.7
1092949	Hepatocarcinoma	2018-03-05	female	72	10.2	30	17	36	152	12.2	2.2	2.8	11.7	(-)0.302	154.5	(-)0.109	(-)1.13	(+)0.663	(－)negative	(－)negative	(+)positive	(－)negative	0	0	1	1	9.5	0	892	0	892	18.1	67.9	13.4	50.6	16.9	128	479	357	119	95	3
1094381	Hepatocarcinoma	2018-01-23	male	49	10.7	46	60	33	49	10.9	1492	2.8	11	(-)0.296	<2.0	(-)0.089	(+)0.003	(+)0.008	(－)negative	(－)negative	(+)positive	(－)negative	0	0	0	1	4.5	0	996	0	996	18.7	51.7	27.3	31.4	15.5	178	493	300	148	260	2
1096094	Hepatocarcinoma	2018-01-29	male	57	10.3	44	25	17	41	10.7	3.5	6	16.1	(-)0.293	>1000.0	(-)0.106	(-)1.54	(-)1.82	(－)negative	(－)negative	(－)negative	(－)negative	0	0	0	1	4.5	0	877	0	877	16.8	74.8	7.6	40.5	32	344	1533	831	656	156	1.3
1109752	Intrahepatic cholangpcarcinoma	2018-04-10	male	67	14.1	45	34	19	22	11.8	2.4	1.6	1219	(-)0.377	83.9	(-)0.111	(+)0.076	(+)0.009	(－)negative	(－)negative	(－)negative	(－)negative	0	0	0	1	3.5	0	913	0	913	21.1	66.3	10.8	42	23.7	389	1220	774	435	200	1.8
1106409	Hepatocarcinoma	2018-03-23	male	76	21.7	45	32	37	191	12.7	7.1	2.6	16.2	(-)0.283	<2.0	(-)0.111	(-)1.65	(-)1.79	(－)negative	(－)negative	(+)positive	(－)negative	0	0	0	1	4.5	0	271	0	271	1.9	87.4	9.4	45.9	39.5	9	394	207	178	42	1.2
1093204	Hepatocarcinoma	2018-01-25	male	80	8.4	43	22	30	24	11.9	59.9	2	8.5	(-)0.252	>1000.0	(-)0.089	(+)0.868	(+)0.008	(－)negative	(－)negative	(+)positive	(－)negative	0	0	0	1	2	0	1230	0	1230	11.9	68.8	17.6	39	29.2	168	965	547	410	247	1.3
1097364	Hepatocarcinoma	2018-02-08	male	49	10.8	47	52	32	44	11.3	3.1	1.8	12	-0.344	<2	-0.102	0.147	0.008	(－)negative	(－)negative	(－)negative	(－)negative	0	0	0	1	2	0	1474	0	1474	14.5	62.5	22	35.8	25.2	304	1306	748	526	459	1.4
919918	Hepatocarcinoma	2015-08-21	male	62	7.9	42	12	23	34	12.3	3.4	3.4	20.2	-0.401	<2	(-)0.089	(+)0.003	0.001	(－)negative	(－)negative	(－)negative	(－)negative	0	0	0	1	5.5	0	1912	0	1912	14	67	18	47	17	126	603	423	153	162	2.8
1118161	Intrahepatic cholangpcarcinoma	2018-05-15	male	82	16.6	52	37	25	251	10.8	3.5	4	794.7	-0.466	>1000	-0.177	0.322	0.011	(-)negative	(-)negative	(-)negative	(-)negative	0	0	0	1	4	0	934	0	934	4.2	81.5	13.5	43.5	31.8	101	1958	1045	764	324	1.4
1164819	Intrahepatic cholangpcarcinoma	2018-12-03	male	52	17.7	46	16	48	60	11.3	3.1	2	945.7	4587	<2	-0.093	0.003	0.008	(-)negative	(-)negative	(-)negative	(-)negative	0	0	0	1	9	1	286	1	286	9.8	49.4	39.9	29	19.3	149	750	440	293	605	1.5
1187146	Intrahepatic cholangpcarcinoma	2019-03-18	female	57	13.4	52	14	23	29	11.1	2.4	0.9	137.3	-0.344	<2	-0.093	-0.414	-0.215	(-)negative	(-)negative	(-)negative	(-)negative	1	0	0	7	4.3	0	1063	0	1063	10.7	60.5	27.8	33.4	25.6	250	1419	782	599	651	1.3
1236173	Intrahepatic cholangpcarcinoma	2019-10-10	male	63	4.6	43	26	21	98	11.1	4	4.5	2	2.54	20.2	0.08	0.002	0.008	(-)negative	(-)negative	(-)negative	(-)negative	1	0	0	1	5.5	0	630	1	36	18.3	66.2	15.2	48.1	16.2	818	2960	2151	723	680	3

## Sheet: Supplementary Table 4
Accession	Gene Name	Description	Coverage	# Peptides	# PSMs	# Unique Peptides	# AAs	MW [kDa]	calc. pI	Abundances A1	Abundances A2	Abundances A3	Abundances B1	Abundances B2	Abundances B3	Average A	Average B	P value
P02741	CRP	C-reactive protein OS=Homo sapiens GN=CRP PE=1 SV=1	29.0179	9	124	9	224	25.023	5.63	32.2	30.2	41.7	149.6	133.1	213.2	34.7	165.3	0.00611718
P19652	ORM2	Alpha-1-acid glycoprotein 2 OS=Homo sapiens GN=ORM2 PE=1 SV=2	39.801	7	27	5	201	23.588	5.11	35.4	33.2	48.7	111.2	224.8	146.8	39.1	160.933	0.0228688
P02763	ORM1	Alpha-1-acid glycoprotein 1 OS=Homo sapiens GN=ORM1 PE=1 SV=1	40.796	8	75	6	201	23.497	5.02	42.6	40.2	54.2	94.2	221.5	147.3	45.6667	154.333	0.043087
Q9UL92		Myosin-reactive immunoglobulin heavy chain variable region (Fragment) OS=Homo sapiens PE=2 SV=1	30.6452	3	5	2	124	13.572	8.43	54.9	43.6	41.2	157.3	197.3	105.7	46.5667	153.433	0.0163943
A0A0B4J278	SERPINA1	Alpha-1-antitrypsin (Fragment) OS=Homo sapiens GN=SERPINA1 PE=1 SV=1	33.3333	3	17	1	144	15.728	4.74	53.5	42.3	47.5	133	222.7	101.1	47.7667	152.267	0.0459507
E9KL23	SERPINA1	Epididymis secretory sperm binding protein Li 44a OS=Homo sapiens GN=SERPINA1 PE=2 SV=1	72.2488	36	1089	1	418	46.707	5.59	57.8	44.8	58.7	135.7	200.9	102	53.7667	146.2	0.0346212
V9HWH9	HEL-S-43	Protein S100 OS=Homo sapiens GN=HEL-S-43 PE=2 SV=1	10.4762	1	1	1	105	11.733	7.12	60	49.2	53.7	95.2	161.9	180	54.3	145.7	0.0244757
P0DJI8	SAA1	Serum amyloid A-1 protein OS=Homo sapiens GN=SAA1 PE=1 SV=1	66.3934	8	29	4	122	13.524	6.79	59.8	48.7	61.8	126.2	152.1	151.5	56.7667	143.267	0.000793219
P13533	MYH6	Myosin-6 OS=Homo sapiens GN=MYH6 PE=1 SV=5	1.3409	2	3	1	1939	223.596	5.73	60.8	61.4	54	139.3	111.6	172.9	58.7333	141.267	0.00991354
Q7Z4W1	DCXR	L-xylulose reductase OS=Homo sapiens GN=DCXR PE=1 SV=2	22.1311	4	4	4	244	25.897	8.1	81.4	42.5	56.3	142.5	129.9	147.4	60.0667	139.933	0.00310057
P06702	S100A9	Protein S100-A9 OS=Homo sapiens GN=S100A9 PE=1 SV=1	81.5789	8	65	8	114	13.234	6.13	51.2	52	78.1	109.7	141.3	167.7	60.4333	139.567	0.0139686
A0A024R454	CPS1	Carbamoyl-phosphate synthetase 1, mitochondrial, isoform CRA_a OS=Homo sapiens GN=CPS1 PE=3 SV=1	1	1	1	1	1500	164.835	6.74	72.8	43.3	65.2	174.4	91.1	153.1	60.4333	139.533	0.0405592
P04424	ASL	Argininosuccinate lyase OS=Homo sapiens GN=ASL PE=1 SV=4	34.0517	13	25	13	464	51.625	6.48	58.9	53.4	71.6	122.7	103.4	190.1	61.3	138.733	0.0447273
A7L8C6		Alpha-1-antitrypsin (Fragment) OS=Homo sapiens PE=3 SV=1	93.8776	4	132	1	49	5.131	8.57	80.9	59.7	47.1	102.7	171.9	137.6	62.5667	137.4	0.0283304
A6XMV9	PRSS2	Protease serine 2 preproprotein OS=Homo sapiens GN=PRSS2 PE=1 SV=1	11.4943	2	29	1	261	27.987	5.14	65.2	58	65.5	156.5	104.1	150.8	62.9	137.133	0.0114724
P05062	ALDOB	Fructose-bisphosphate aldolase B OS=Homo sapiens GN=ALDOB PE=1 SV=2	62.0879	18	107	17	364	39.448	7.87	67.4	54.6	67.6	145.1	111.6	153.8	63.2	136.833	0.00558505
P05109	S100A8	Protein S100-A8 OS=Homo sapiens GN=S100A8 PE=1 SV=1	61.2903	9	59	9	93	10.828	7.03	59.8	52.5	77.8	107.1	138.8	164	63.3667	136.633	0.0154937
P05387	RPLP2	60S acidic ribosomal protein P2 OS=Homo sapiens GN=RPLP2 PE=1 SV=1	10.4348	1	1	1	115	11.658	4.54	56.9	59.5	74.9	140.7	110	157.9	63.7667	136.2	0.00865467
Q08830	FGL1	Fibrinogen-like protein 1 OS=Homo sapiens GN=FGL1 PE=1 SV=3	18.9103	6	10	6	312	36.357	5.87	68.1	55.2	69.5	115.3	156.6	135.4	64.2667	135.767	0.00498498
B3KS79		cDNA FLJ35730 fis, clone TESTI2003131, highly similar to ALPHA-1-ANTICHYMOTRYPSIN OS=Homo sapiens PE=2 SV=1	61.6071	26	945	26	448	50.596	5.63	59.1	65.2	69.3	144.9	111.4	150.1	64.5333	135.467	0.0047352
A0A109NGN6		Proteasome subunit alpha type OS=Homo sapiens PE=2 SV=1	26.1411	4	6	4	241	26.394	4.79	58.7	56.4	79.2	135.1	104.9	165.5	64.7667	135.167	0.0205123
P02461	COL3A1	Collagen alpha-1(III) chain OS=Homo sapiens GN=COL3A1 PE=1 SV=4	1.84175	2	3	2	1466	138.479	6.61	60.7	62	73.7	124.9	113.8	164.9	65.4667	134.533	0.0126373
P18428	LBP	Lipopolysaccharide-binding protein OS=Homo sapiens GN=LBP PE=1 SV=3	25.7796	12	78	12	481	53.35	6.7	62.7	66.7	67.9	114.5	120.4	167.7	65.7667	134.2	0.0155139
P0DJI9	SAA2	Serum amyloid A-2 protein OS=Homo sapiens GN=SAA2 PE=1 SV=1	57.377	7	24	3	122	13.519	9.14	69.5	55	73.5	118.5	133.8	149.7	66	134	0.00305205
P24298	GPT	Alanine aminotransferase 1 OS=Homo sapiens GN=GPT PE=1 SV=3	29.2339	10	21	10	496	54.602	7.18	77.9	62.6	72.3	119.2	103.1	164.9	70.9333	129.067	0.0379181
P16930	FAH	Fumarylacetoacetase OS=Homo sapiens GN=FAH PE=1 SV=2	32.6969	11	19	11	419	46.344	6.95	80.8	56.2	76.2	120	106.6	160.2	71.0667	128.933	0.0312784
P23141	CES1	Liver carboxylesterase 1 OS=Homo sapiens GN=CES1 PE=1 SV=2	19.4004	8	13	8	567	62.481	6.6	75.5	58.8	80.4	113.3	131	141	71.5667	128.433	0.00545756
Q7Z528		E3-16 OS=Homo sapiens PE=2 SV=1	4.88722	1	1	1	266	30.405	5.22	83.6	58.2	74	129.8	125.4	128.9	71.9333	128.033	0.00172999
E9KL48	GLUD1	Epididymis tissue sperm binding protein Li 18mP OS=Homo sapiens GN=GLUD1 PE=2 SV=1	29.0323	13	17	13	558	61.359	7.8	83.3	58.1	77.8	130.6	110.2	140.1	73.0667	126.967	0.0099077
P42126	ECI1	Enoyl-CoA delta isomerase 1, mitochondrial OS=Homo sapiens GN=ECI1 PE=1 SV=1	20.1987	6	13	6	302	32.795	8.54	75.5	63.7	81.7	113.4	106.7	159.1	73.6333	126.4	0.0379573
B3KUG7		cDNA FLJ39850 fis, clone SPLEN2014739, highly similar to Zinc finger protein 101 OS=Homo sapiens PE=2 SV=1	2.29358	1	4	1	436	50.273	9.57	66.9	72.3	84.5	134.6	103.6	138.2	74.5667	125.467	0.013829
B7Z507		cDNA FLJ51036, highly similar to Matrix metalloproteinase-9 (EC3.4.24.35) OS=Homo sapiens PE=2 SV=1	17.7469	8	9	2	648	71.509	5.86	86.8	54.9	85.8	120.3	134.5	117.7	75.8333	124.167	0.0144819
P02792	FTL	Ferritin light chain OS=Homo sapiens GN=FTL PE=1 SV=2	42.2857	7	13	7	175	20.007	5.78	68.3	78.1	82.9	104.1	113.2	153.4	76.4333	123.567	0.0401878
P00480	OTC	Ornithine carbamoyltransferase, mitochondrial OS=Homo sapiens GN=OTC PE=1 SV=3	15.5367	5	5	5	354	39.91	8.63	86.2	69.8	75.3	124.1	97.8	146.7	77.1	122.867	0.0374515
Q8NBJ4	GOLM1	Golgi membrane protein 1 OS=Homo sapiens GN=GOLM1 PE=1 SV=1	9.22693	3	8	3	401	45.306	4.97	78.7	68	85.8	108.2	113.2	146.1	77.5	122.5	0.025562
K7ES70	MFAP4	Microfibril-associated glycoprotein 4 OS=Homo sapiens GN=MFAP4 PE=1 SV=1	2.5	1	1	1	280	31.306	5.87	85.9	63.8	83.2	144.2	120.8	102.1	77.6333	122.367	0.0332466
P08123	COL1A2	Collagen alpha-2(I) chain OS=Homo sapiens GN=COL1A2 PE=1 SV=7	0.878477	1	1	1	1366	129.235	8.95	74.3	77.8	81.2	96	129.1	141.7	77.7667	122.267	0.031943
Q9UI17	DMGDH	Dimethylglycine dehydrogenase, mitochondrial OS=Homo sapiens GN=DMGDH PE=1 SV=2	5.54273	3	3	3	866	96.75	7.62	94.9	64	76.6	119.2	109.8	135.5	78.5	121.5	0.0212791
A0A024R035	C9	Complement component 9, isoform CRA_a OS=Homo sapiens GN=C9 PE=4 SV=1	53.6673	29	286	29	559	63.163	5.52	74.8	79.4	82.6	116.1	111.8	135.4	78.9333	121.1	0.00516717
Q8TC04	KRT23	Keratin 23 (Histone deacetylase inducible) OS=Homo sapiens GN=KRT23 PE=2 SV=1	1.65877	1	1	1	422	48.147	6.54	77.5	75.7	84.3	97.7	117.6	147.2	79.1667	120.833	0.0463701
P28072	PSMB6	Proteasome subunit beta type-6 OS=Homo sapiens GN=PSMB6 PE=1 SV=4	11.7155	3	5	3	239	25.341	4.92	78.9	78.6	85.3	121.7	97	138.5	80.9333	119.067	0.0357584
P02671	FGA	Fibrinogen alpha chain OS=Homo sapiens GN=FGA PE=1 SV=2	46.1894	38	438	38	866	94.914	6.01	83.4	76.3	89.4	117.1	118	115.8	83.0333	116.967	0.000904863
A8K383		cDNA FLJ75428, highly similar to Homo sapiens activating transcription factor 6 (ATF6), mRNA OS=Homo sapiens PE=2 SV=1	3.13433	2	2	2	670	74.547	8.22	69.6	85.9	97.7	122.4	100.6	123.8	84.4	115.6	0.0480343
B7ZKJ8	ITIH4	ITIH4 protein OS=Homo sapiens GN=ITIH4 PE=1 SV=1	53.9037	42	739	1	935	103.816	6.89	68.4	92.6	92.3	122.6	103.9	120.2	84.4333	115.567	0.0351017
P02649	APOE	Apolipoprotein E OS=Homo sapiens GN=APOE PE=1 SV=1	67.5079	24	181	21	317	36.132	5.73	82.1	86.1	85.5	101.7	113	131.6	84.5667	115.433	0.0247728
P02679	FGG	Fibrinogen gamma chain OS=Homo sapiens GN=FGG PE=1 SV=3	65.7837	28	632	3	453	51.479	5.62	90	77.9	88	117.6	114.9	111.6	85.3	114.7	0.00205284
B7Z351	SPP1	Secreted phosphoprotein 1 variant 6 OS=Homo sapiens GN=SPP1 PE=2 SV=1	14.0673	3	5	3	327	37.222	4.73	91.9	69.5	94.8	115.9	107.2	120.8	85.4	114.633	0.0306686
P00451	F8	Coagulation factor VIII OS=Homo sapiens GN=F8 PE=1 SV=1	5.10421	10	13	10	2351	266.841	7.36	88.8	73.9	94.6	113.6	109.7	119.5	85.7667	114.267	0.0137342
Q06033	ITIH3	Inter-alpha-trypsin inhibitor heavy chain H3 OS=Homo sapiens GN=ITIH3 PE=1 SV=2	37.7528	28	317	28	890	99.787	5.74	92.1	83.1	83.2	121.8	116.7	103	86.1333	113.833	0.0120854
V9HVY1	HEL-S-78p	Epididymis secretory sperm binding protein Li 78p OS=Homo sapiens GN=HEL-S-78p PE=2 SV=1	77.5967	39	854	39	491	55.892	8.27	91.2	77.7	90.4	110	119.4	111.2	86.4333	113.533	0.006812
P15291	B4GALT1	Beta-1,4-galactosyltransferase 1 OS=Homo sapiens GN=B4GALT1 PE=1 SV=5	5.02513	1	1	1	398	43.892	8.65	89.7	80.1	91.5	119.9	98.6	120.3	87.1	112.933	0.03192
B2RA39		cDNA, FLJ94686, highly similar to Homo sapiens complement factor H-related 5 (CFHL5), mRNA OS=Homo sapiens PE=2 SV=1	38.6643	18	54	17	569	64.349	7.06	80.4	87.6	93.9	105.8	117.6	114.8	87.3	112.733	0.00854361
P13647	KRT5	Keratin, type II cytoskeletal 5 OS=Homo sapiens GN=KRT5 PE=1 SV=3	33.0508	19	34	2	590	62.34	7.74	87.6	86.1	89.8	107.3	108.3	120.9	87.8333	112.167	0.00569219
B3KQF4		cDNA FLJ90373 fis, clone NT2RP2004606, highly similar to Metalloproteinase inhibitor 1 OS=Homo sapiens PE=2 SV=1	45.4106	7	14	7	207	23.166	8.1	85.5	83.6	99	114.9	103.4	113.6	89.3667	110.633	0.0246849
Q16270	IGFBP7	Insulin-like growth factor-binding protein 7 OS=Homo sapiens GN=IGFBP7 PE=1 SV=1	21.2766	4	4	4	282	29.111	7.9	114	103.7	109.8	90.5	86.2	95.7	109.167	90.8	0.0106283
A0A0X9TD88		GCT-A3 heavy chain variable region (Fragment) OS=Homo sapiens PE=2 SV=1	12.5984	1	6	1	127	13.804	8.46	108.1	104.5	115	100.2	86.3	85.9	109.2	90.8	0.0306862
P40197	GP5	Platelet glycoprotein V OS=Homo sapiens GN=GP5 PE=1 SV=1	10.8929	4	5	4	560	60.921	9.63	113.8	101.4	112.5	96.4	84.8	91	109.233	90.7333	0.023179
F6WQW2	RANBP1	Ran-specific GTPase-activating protein OS=Homo sapiens GN=RANBP1 PE=1 SV=1	3.95683	1	1	1	278	31.884	8.75	117.7	99.1	111.9	84	93.7	93.7	109.567	90.4667	0.040104
P00558	PGK1	Phosphoglycerate kinase 1 OS=Homo sapiens GN=PGK1 PE=1 SV=3	22.3022	5	6	5	417	44.586	8.1	106.9	107.1	114.7	90.8	88.8	91.7	109.567	90.4333	0.00211274
P09172	DBH	Dopamine beta-hydroxylase OS=Homo sapiens GN=DBH PE=1 SV=3	29.3355	13	35	13	617	69.021	6.42	111.3	99.7	117.8	86.8	87.4	97	109.6	90.4	0.0370505
A0A0K0K1J1	HEL-S-2	Cystatin OS=Homo sapiens GN=HEL-S-2 PE=2 SV=1	42.4658	5	27	5	146	15.789	8.75	113	103.2	112.9	92.7	85.6	92.7	109.7	90.3333	0.0085418
P15531	NME1	Nucleoside diphosphate kinase A OS=Homo sapiens GN=NME1 PE=1 SV=1	24.3421	3	4	3	152	17.138	6.19	108.8	107.4	113.6	88.4	84.8	97	109.933	90.0667	0.00820297
E7EUF1	ENPP2	Ectonucleotide pyrophosphatase/phosphodiesterase family member 2 OS=Homo sapiens GN=ENPP2 PE=1 SV=1	20.1357	15	21	15	884	101.488	7.53	111.9	101.1	117	96.2	82	91.9	110	90.0333	0.0338211
B4DVA7		Beta-hexosaminidase OS=Homo sapiens PE=2 SV=1	3.14815	1	1	1	540	61.974	5.26	113.8	99.1	117.7	92.2	81.2	96	110.2	89.8	0.0470851
P02760	AMBP	Protein AMBP OS=Homo sapiens GN=AMBP PE=1 SV=1	51.9886	16	270	8	352	38.974	6.25	122.6	106.2	102	91.2	90.2	87.9	110.267	89.7667	0.0321836
Q05D08	PA2G4	PA2G4 protein (Fragment) OS=Homo sapiens GN=PA2G4 PE=2 SV=1	2.95567	1	1	1	406	45.122	8.95	105.2	107.9	118.2	87.2	89.1	92.4	110.433	89.5667	0.00793549
O75882	ATRN	Attractin OS=Homo sapiens GN=ATRN PE=1 SV=2	27.2918	31	143	31	1429	158.432	7.31	112.1	107.4	111.9	91	84.4	93.2	110.467	89.5333	0.00238041
A4D2D2	PCOLCE	Procollagen C-endopeptidase enhancer OS=Homo sapiens GN=PCOLCE PE=4 SV=1	20.49	6	16	6	449	47.928	7.43	119.3	97.6	114.6	92.3	86.5	89.7	110.5	89.5	0.0366569
P35443	THBS4	Thrombospondin-4 OS=Homo sapiens GN=THBS4 PE=1 SV=2	20.3954	12	19	10	961	105.802	4.68	111.9	101.6	118.2	90.2	82.9	95.1	110.567	89.4	0.0242482
B7Z539		cDNA FLJ56954, highly similar to Inter-alpha-trypsin inhibitor heavy chain H1 OS=Homo sapiens PE=2 SV=1	51.3178	32	630	22	645	72.074	7.68	121.4	102.1	108.5	91.9	86.6	89.5	110.667	89.3333	0.0221843
Q16610	ECM1	Extracellular matrix protein 1 OS=Homo sapiens GN=ECM1 PE=1 SV=2	61.8519	24	175	24	540	60.635	6.71	118.2	96.5	117.5	90.9	86.1	90.8	110.733	89.2667	0.0422522
Q65ZC9	scFv	Single-chain Fv (Fragment) OS=Homo sapiens GN=scFv PE=2 SV=1	20	4	47	1	240	25.554	9.11	120.9	111.5	100	91	96.4	80.2	110.8	89.2	0.0484525
Q9BWP8	COLEC11	Collectin-11 OS=Homo sapiens GN=COLEC11 PE=1 SV=1	25.0923	6	15	6	271	28.647	5.41	108.8	112.6	111.3	91	89.8	86.6	110.9	89.1333	0.000225904
P67936	TPM4	Tropomyosin alpha-4 chain OS=Homo sapiens GN=TPM4 PE=1 SV=3	21.371	5	7	3	248	28.504	4.69	101.6	124.5	106.5	89.4	86.4	91.5	110.867	89.1	0.037724
A8K6C9		cDNA FLJ78037, highly similar to Homo sapiens insulin-like growth factor 2 (somatomedin A), mRNA OS=Homo sapiens PE=2 SV=1	13.8889	2	10	2	180	20.159	9.32	118.4	105.2	109.4	95.7	81.4	89.9	111	89	0.0180731
Q16853	AOC3	Membrane primary amine oxidase OS=Homo sapiens GN=AOC3 PE=1 SV=3	17.8244	10	17	10	763	84.568	6.52	120	100.4	113	96.9	79.5	90.2	111.133	88.8667	0.0436882
Q06830	PRDX1	Peroxiredoxin-1 OS=Homo sapiens GN=PRDX1 PE=1 SV=1	18.593	4	15	3	199	22.096	8.13	120.2	100.6	113.1	86.4	84.3	95.5	111.3	88.7333	0.0278456
A0A024R944	SERPINC1	Serpin peptidase inhibitor, clade C (Antithrombin), member 1, isoform CRA_a OS=Homo sapiens GN=SERPINC1 PE=3 SV=1	53.4483	30	634	30	464	52.569	6.71	114.5	113.5	106.2	93.2	81.8	90.7	111.4	88.5667	0.00623514
Q9Y490	TLN1	Talin-1 OS=Homo sapiens GN=TLN1 PE=1 SV=3	16.0567	26	36	26	2541	269.599	6.07	97.4	121.3	115.6	90.5	83.9	91.3	111.433	88.5667	0.0392723
P23142	FBLN1	Fibulin-1 OS=Homo sapiens GN=FBLN1 PE=1 SV=4	39.1181	22	89	7	703	77.162	5.22	119.6	97.7	117.5	93.8	80.6	90.9	111.6	88.4333	0.0450186
B2R780		cDNA, FLJ93320, highly similar to Homo sapiens angiopoietin-like 2 (ANGPTL2), mRNA OS=Homo sapiens PE=2 SV=1	2.23124	1	1	1	493	57.014	7.52	125.4	106.9	102.5	88.8	88.1	88.3	111.6	88.4	0.0297851
V9HWC7	HEL-S-128m	Epididymis secretory sperm binding protein Li 128m OS=Homo sapiens GN=HEL-S-128m PE=2 SV=1	36.1607	7	11	7	224	25.019	6.38	114.5	99.8	120.6	85.8	89.8	89.6	111.633	88.4	0.0211541
Q6YHK3	CD109	CD109 antigen OS=Homo sapiens GN=CD109 PE=1 SV=2	13.1488	14	22	14	1445	161.587	5.85	112.9	105.3	116.9	94.1	80.3	90.4	111.7	88.2667	0.011845
Q5EFE5		Anti-RhD monoclonal T125 gamma1 heavy chain OS=Homo sapiens PE=2 SV=1	34.1053	12	85	1	475	52.329	8.35	110.4	117.6	107.5	83.8	103.3	77.4	111.833	88.1667	0.0470985
A0A140VKA6		Testis secretory sperm-binding protein Li 233m OS=Homo sapiens PE=2 SV=1	6.23306	2	2	2	369	41.305	5.27	104	108.8	123	91.2	86.8	86.3	111.933	88.1	0.015723
B0YJC6	PROZ	Vitamin K-dependent protein Z variant 1 OS=Homo sapiens GN=PROZ PE=3 SV=1	27.3159	10	28	10	421	46.91	6.04	115.2	111.9	109.5	87.7	83.7	92	112.2	87.8	0.0011081
P05546	SERPIND1	Heparin cofactor 2 OS=Homo sapiens GN=SERPIND1 PE=1 SV=3	54.9098	24	370	24	499	57.034	6.9	110.1	119.9	106.8	90.2	89.9	83.1	112.267	87.7333	0.00579576
Q8N7G1		Purine nucleoside phosphorylase OS=Homo sapiens PE=2 SV=1	41.6382	8	12	8	293	32.53	7.21	119.9	95.8	121.2	87.7	84.9	90.4	112.3	87.6667	0.0428511
O95445	APOM	Apolipoprotein M OS=Homo sapiens GN=APOM PE=1 SV=2	31.383	7	19	7	188	21.239	6.01	103.6	125.9	108.6	91.5	87.5	82.9	112.7	87.3	0.0242618
B4DPQ3		cDNA FLJ51034, highly similar to Vitamin K-dependent protein C (EC 3.4.21.69) OS=Homo sapiens PE=2 SV=1	26.6925	8	30	8	517	57.35	7.53	118.1	117.3	102.8	94.2	88.4	79.2	112.733	87.2667	0.0183285
P00747	PLG	Plasminogen OS=Homo sapiens GN=PLG PE=1 SV=2	79.7531	61	673	53	810	90.51	7.24	109.6	117.6	111.5	101.4	76.4	83.5	112.9	87.1	0.0299506
V9HWE9	HEL-S-22	Epididymis secretory protein Li 22 OS=Homo sapiens GN=HEL-S-22 PE=2 SV=1	25.7143	4	5	4	210	23.341	5.64	106.3	110.1	122.8	93.7	77.8	89.3	113.067	86.9333	0.0191431
P25774	CTSS	Cathepsin S OS=Homo sapiens GN=CTSS PE=1 SV=3	8.1571	2	3	2	331	37.471	8.34	111.1	108.5	119.7	84.6	90.7	85.5	113.1	86.9333	0.00252396
B2R642		cDNA, FLJ92775, highly similar to Homo sapiens melanoma cell adhesion molecule (MCAM), mRNA OS=Homo sapiens PE=2 SV=1	20.4334	10	17	10	646	71.591	5.76	110.9	113.2	115.3	91.2	79.6	89.8	113.133	86.8667	0.00246098
A0A0X9UWK7		MS-D4 heavy chain variable region (Fragment) OS=Homo sapiens PE=2 SV=1	52.459	5	20	3	122	13.517	7.12	121.6	112.9	105.1	86.2	90	84.2	113.2	86.8	0.00643883
Q13332	PTPRS	Receptor-type tyrosine-protein phosphatase S OS=Homo sapiens GN=PTPRS PE=1 SV=3	7.64887	8	8	8	1948	216.905	6.46	124.5	101.5	113.9	87.5	82.6	89.9	113.3	86.6667	0.018891
B4E1C2	KNG1	Kininogen 1, isoform CRA_b OS=Homo sapiens GN=KNG1 PE=2 SV=1	47.9814	36	771	8	644	71.87	6.81	119.5	108	112.9	89.2	78.7	91.7	113.467	86.5333	0.0065748
D6REA1	SIL1	Nucleotide exchange factor SIL1 OS=Homo sapiens GN=SIL1 PE=1 SV=1	2.77778	1	1	1	468	52.715	5.3	128.2	102.5	110.2	93.4	83.5	82.3	113.633	86.4	0.0314732
P49908	SEPP1	Selenoprotein P OS=Homo sapiens GN=SEPP1 PE=1 SV=3	17.5853	7	26	7	381	43.156	7.87	116.8	115.9	108.4	93.1	81.6	84.2	113.7	86.3	0.00333939
A0A024R104	CNTN1	Contactin 1, isoform CRA_a OS=Homo sapiens GN=CNTN1 PE=4 SV=1	12.5737	9	10	9	1018	113.249	5.9	129	106.3	106.1	90.5	89.4	78.7	113.8	86.2	0.0312471
P05019	IGF1	Insulin-like growth factor I OS=Homo sapiens GN=IGF1 PE=1 SV=1	13.8462	2	3	2	195	21.827	9.72	112.6	104	124.8	86.4	78.2	93.9	113.8	86.1667	0.0215583
H3BLU2	LSAMP	Limbic system-associated membrane protein (Fragment) OS=Homo sapiens GN=LSAMP PE=1 SV=1	14.2029	4	4	4	345	37.991	6.86	124	97	120.5	95.5	77.6	85.4	113.833	86.1667	0.0495796
P54289	CACNA2D1	Voltage-dependent calcium channel subunit alpha-2/delta-1 OS=Homo sapiens GN=CACNA2D1 PE=1 SV=3	13.146	10	15	10	1103	124.49	5.27	127	113.4	101.4	96.4	83.9	77.9	113.933	86.0667	0.0386413
A8K6C1		cDNA FLJ76868, highly similar to Homo sapiens cholesteryl ester transfer protein, plasma (CETP), mRNA OS=Homo sapiens PE=2 SV=1	6.69371	3	3	3	493	54.745	6.09	118.7	103.7	119.6	90.7	71	96.3	114	86	0.0388201
P58546	MTPN	Myotrophin OS=Homo sapiens GN=MTPN PE=1 SV=2	25.4237	2	4	2	118	12.887	5.52	114.5	108.1	120.5	96.1	72	88.9	114.367	85.6667	0.0229166
Q59EJ3		Heat shock 70kDa protein 1A variant (Fragment) OS=Homo sapiens PE=2 SV=1	7.7574	4	7	2	709	77.448	6.3	109.5	101.5	132.2	84.7	93.7	78.4	114.4	85.6	0.0477971
Q76LX8	ADAMTS13	A disintegrin and metalloproteinase with thrombospondin motifs 13 OS=Homo sapiens GN=ADAMTS13 PE=1 SV=1	13.5249	13	24	13	1427	153.505	7.17	119.4	98.7	125.2	85	80.2	91.5	114.433	85.5667	0.0292639
P20061	TCN1	Transcobalamin-1 OS=Homo sapiens GN=TCN1 PE=1 SV=2	6.92841	2	4	2	433	48.176	5.03	124.4	106.3	112.6	95.6	86	75.1	114.433	85.5667	0.0221433
Q9UGM5	FETUB	Fetuin-B OS=Homo sapiens GN=FETUB PE=1 SV=2	36.911	10	61	10	382	42.028	6.83	115.1	113.6	115.8	100.7	76.3	78.5	114.833	85.1667	0.0192042
Q99497	PARK7	Protein deglycase DJ-1 OS=Homo sapiens GN=PARK7 PE=1 SV=2	38.0952	5	7	5	189	19.878	6.79	114.5	104.9	125.3	81.7	82.1	91.6	114.9	85.1333	0.0114386
Q96S96	PEBP4	Phosphatidylethanolamine-binding protein 4 OS=Homo sapiens GN=PEBP4 PE=1 SV=3	17.1806	3	3	3	227	25.717	6.54	124.7	115.6	104.9	77.7	87.4	89.8	115.067	84.9667	0.0115308
A8K6K4		cDNA FLJ77565, highly similar to Homo sapiens interleukin 1 receptor accessory protein (IL1RAP), transcript variant 1, mRNA OS=Homo sapiens PE=2 SV=1	9.29825	6	11	6	570	65.391	8.22	108.8	116	120.8	92.1	80.5	81.8	115.2	84.8	0.0038693
P01023	A2M	Alpha-2-macroglobulin OS=Homo sapiens GN=A2M PE=1 SV=3	63.5685	76	2310	67	1474	163.188	6.46	127.5	114.5	104.2	93.4	81	79.4	115.4	84.6	0.0187818
A0A0S2Z4I5	CFP	Complement factor properdin isoform 1 (Fragment) OS=Homo sapiens GN=CFP PE=2 SV=1	20.6823	6	21	6	469	51.242	7.9	109.3	118.1	119.3	94.1	73.5	85.7	115.567	84.4333	0.00999101
A8KA29		cDNA FLJ75302 OS=Homo sapiens PE=2 SV=1	2.75362	2	2	2	690	77.804	7.52	107.1	109.8	129.9	81.6	81.8	89.7	115.6	84.3667	0.0152029
P26447	S100A4	Protein S100-A4 OS=Homo sapiens GN=S100A4 PE=1 SV=1	10.8911	1	1	1	101	11.721	6.11	109.4	121.1	116.6	86.5	78.9	87.5	115.7	84.3	0.00196513
A0A024R230	NTRK2	Tyrosine-protein kinase receptor OS=Homo sapiens GN=NTRK2 PE=3 SV=1	1.78998	1	1	1	838	93.766	6.57	116	113.1	118.3	84	82.1	86.4	115.8	84.1667	8.48648e-05
W8QEY1		Lactoferrin OS=Homo sapiens PE=2 SV=1	37.834	19	25	2	711	78.332	8.18	118.8	97.9	130.8	78.3	81.9	92.3	115.833	84.1667	0.0392002
Q96PD5	PGLYRP2	N-acetylmuramoyl-L-alanine amidase OS=Homo sapiens GN=PGLYRP2 PE=1 SV=1	40.9722	15	135	15	576	62.178	7.55	129.3	111.7	106.6	91.7	85.6	75.1	115.867	84.1333	0.0195733
D3DR24	EXT2	Exostoses (Multiple) 2, isoform CRA_a OS=Homo sapiens GN=EXT2 PE=4 SV=1	0.957592	1	1	1	731	83.664	6.16	121.9	127.6	98.2	76	94.3	82	115.9	84.1	0.038725
P05160	F13B	Coagulation factor XIII B chain OS=Homo sapiens GN=F13B PE=1 SV=3	59.4554	33	187	33	661	75.461	6.39	106.2	124.3	117.4	86.1	84	82	115.967	84.0333	0.00410859
Q04756	HGFAC	Hepatocyte growth factor activator OS=Homo sapiens GN=HGFAC PE=1 SV=1	31.2977	15	50	15	655	70.636	7.24	126.2	118.7	103.3	92	78.6	81.2	116.067	83.9333	0.0151951
P43251	BTD	Biotinidase OS=Homo sapiens GN=BTD PE=1 SV=2	26.151	13	46	13	543	61.093	6.25	117.7	112.2	118.3	91.8	74.3	85.7	116.067	83.9333	0.00423277
B7ZKQ8	PODXL	PODXL protein OS=Homo sapiens GN=PODXL PE=2 SV=1	2.32143	1	2	1	560	58.839	5.49	133.1	114.8	100.6	87.4	84.1	80.1	116.167	83.8667	0.0285584
D3DNN4	BCHE	Carboxylic ester hydrolase OS=Homo sapiens GN=BCHE PE=3 SV=1	28.7714	18	52	18	643	72.836	7.55	121.5	107.6	120.2	90.3	76.1	84.3	116.433	83.5667	0.00556597
F5H423		Uncharacterized protein OS=Homo sapiens PE=3 SV=1	10.4762	2	2	2	210	23.331	8.6	110.3	118	121.8	74.8	90.2	85	116.7	83.3333	0.00410953
Q9NR34	MAN1C1	Mannosyl-oligosaccharide 1,2-alpha-mannosidase IC OS=Homo sapiens GN=MAN1C1 PE=1 SV=1	1.26984	1	2	1	630	70.866	7.46	123.8	127.8	98.5	95.1	80.2	74.6	116.7	83.3	0.038808
D3DRR6	ITIH2	Inter-alpha (Globulin) inhibitor H2, isoform CRA_a OS=Homo sapiens GN=ITIH2 PE=4 SV=1	42.1331	36	744	36	947	106.502	6.95	121.7	114.7	113.7	89.6	78.5	81.7	116.7	83.2667	0.00128794
B3KS49		cDNA FLJ35478 fis, clone SMINT2007796, highly similar to Gelsolin OS=Homo sapiens PE=2 SV=1	50.7216	18	209	1	485	52.31	5.49	136.8	99.1	114.7	93	78.1	78.3	116.867	83.1333	0.048241
Q6N095	DKFZp686K03196	Uncharacterized protein OS=Homo sapiens GN=DKFZp686K03196 PE=1 SV=1	28	11	80	2	475	52.327	8.57	112.6	132.9	105.4	82.7	97.3	69.1	116.967	83.0333	0.0427942
Q549J4	ERAF	Erythroid associated factor OS=Homo sapiens GN=ERAF PE=2 SV=1	12.7451	1	2	1	102	11.833	5	130.5	115.3	105.4	80	93.3	75.5	117.067	82.9333	0.0195506
B7Z8Q2		cDNA FLJ55606, highly similar to Alpha-2-HS-glycoprotein OS=Homo sapiens PE=2 SV=1	48.7298	13	373	13	433	46.597	6.28	120.8	114.5	116.4	83.9	74.4	90.1	117.233	82.8	0.00221381
P12821	ACE	Angiotensin-converting enzyme OS=Homo sapiens GN=ACE PE=1 SV=1	9.41807	10	12	10	1306	149.62	6.39	135	105	111.8	84.7	76.1	87.4	117.267	82.7333	0.0235787
Q6U841	SLC4A10	Sodium-driven chloride bicarbonate exchanger OS=Homo sapiens GN=SLC4A10 PE=2 SV=1	0.894454	1	1	1	1118	125.866	6.49	134.7	103.8	113.4	90.6	74.3	83.2	117.3	82.7	0.0281105
H0YAC1	KLKB1	Plasma kallikrein (Fragment) OS=Homo sapiens GN=KLKB1 PE=1 SV=1	50	31	201	31	686	76.833	8.06	112.4	121.9	117.8	84.1	81	82.8	117.367	82.6333	0.000276283
B2RBF5		cDNA, FLJ95483, highly similar to Homo sapiens chitobiase, di-N-acetyl- (CTBS), mRNA OS=Homo sapiens PE=2 SV=1	17.9221	4	14	4	385	43.766	6.64	106	114.7	131.8	85.4	78.1	83.9	117.5	82.4667	0.0113734
B2RDY9		Adenylyl cyclase-associated protein OS=Homo sapiens PE=2 SV=1	7.15789	2	3	2	475	51.583	8.22	115.3	127.8	109.9	82.2	80.6	84.3	117.667	82.3667	0.00284573
P61970	NUTF2	Nuclear transport factor 2 OS=Homo sapiens GN=NUTF2 PE=1 SV=1	11.0236	1	1	1	127	14.469	5.38	122.6	104.7	126	93	69.9	83.9	117.767	82.2667	0.0196451
B2R8I2		cDNA, FLJ93914, highly similar to Homo sapiens histidine-rich glycoprotein (HRG), mRNA OS=Homo sapiens PE=2 SV=1	55.4286	23	427	1	525	59.475	7.44	120.6	135.5	98.9	91.3	85.1	68.6	118.333	81.6667	0.0436928
B6V6K6	MYOC	Mutant myocilin OS=Homo sapiens GN=MYOC PE=2 SV=1	11.3095	4	8	4	504	56.953	5.54	131.6	100	124.1	89	76.3	78.9	118.567	81.4	0.0225137
P24592	IGFBP6	Insulin-like growth factor-binding protein 6 OS=Homo sapiens GN=IGFBP6 PE=1 SV=1	27.5	4	12	4	240	25.306	7.81	120.7	102.6	132.5	89.9	84.6	69.6	118.6	81.3667	0.0246833
P43652	AFM	Afamin OS=Homo sapiens GN=AFM PE=1 SV=1	53.5893	33	300	33	599	69.024	5.9	120.4	116.8	119	83.7	73.2	87	118.733	81.3	0.00095063
Q13103	SPP2	Secreted phosphoprotein 24 OS=Homo sapiens GN=SPP2 PE=1 SV=1	5.6872	1	2	1	211	24.322	8.32	127.9	103.3	125.6	89.8	76.7	76.7	118.933	81.0667	0.0135035
K4DIA0	ICOSLG	ICOS ligand OS=Homo sapiens GN=ICOSLG PE=1 SV=1	5.91966	2	3	2	473	51.892	8.05	118.2	118	121.6	82.3	72.7	87.2	119.267	80.7333	0.000950011
A0A125QYY9		IBM-B2 heavy chain variable region (Fragment) OS=Homo sapiens PE=2 SV=1	21.9512	2	6	1	123	13.561	7.12	121	119.1	118	84.3	80.7	76.9	119.367	80.6333	7.40299e-05
A0A1B1CYC8	Gc	Vitamin D binding protein (Fragment) OS=Homo sapiens GN=Gc PE=4 SV=1	33.3333	8	93	8	39	4.205	9.11	128.7	120.8	108.9	100.4	65.3	76	119.467	80.5667	0.0306151
P35858	IGFALS	Insulin-like growth factor-binding protein complex acid labile subunit OS=Homo sapiens GN=IGFALS PE=1 SV=1	38.3471	19	91	19	605	65.994	6.79	126	102.5	130.2	79.3	69.1	92.9	119.567	80.4333	0.0238908
B2R6V9		cDNA, FLJ93141, highly similar to Homo sapiens coagulation factor XIII, A1 polypeptide (F13A1), mRNA OS=Homo sapiens PE=2 SV=1	34.6995	22	91	22	732	83.189	6	125.8	116.2	117.6	79.2	83.4	77.8	119.867	80.1333	0.000318889
A0A140C6V4	HLA-DPA1	MHC class II antigen OS=Homo sapiens GN=HLA-DPA1 PE=3 SV=1	4.61538	1	2	1	260	29.396	5.21	101.6	114.4	145.4	79.6	77.6	81.4	120.467	79.5333	0.0349519
P80108	GPLD1	Phosphatidylinositol-glycan-specific phospholipase D OS=Homo sapiens GN=GPLD1 PE=1 SV=3	30.119	23	83	23	840	92.278	6.37	117.2	113.3	131.8	76.6	76.2	84.8	120.767	79.2	0.00271659
A8K3I0		cDNA FLJ78437, highly similar to Homo sapiens cartilage oligomeric matrix protein (COMP), mRNA OS=Homo sapiens PE=2 SV=1	35.535	16	38	14	757	82.834	4.59	135.1	113.8	114.6	80.6	75.4	80.5	121.167	78.8333	0.00413663
B7Z9A0		cDNA FLJ56212, highly similar to Gelsolin OS=Homo sapiens PE=2 SV=1	55.4967	34	316	1	755	83.052	5.85	116.5	101.4	146.4	90.7	78	67	121.433	78.5667	0.0450664
Q92520	FAM3C	Protein FAM3C OS=Homo sapiens GN=FAM3C PE=1 SV=1	4.40529	1	1	1	227	24.665	8.29	121.2	119.7	123.8	72.4	85.3	77.5	121.567	78.4	0.000393328
Q9NQ79	CRTAC1	Cartilage acidic protein 1 OS=Homo sapiens GN=CRTAC1 PE=1 SV=2	34.6445	17	26	17	661	71.376	5.12	128.1	115.2	121.8	80.5	73.9	80.5	121.7	78.3	0.000554771
V9HW80	HEL-S-70	Epididymis luminal protein 220 OS=Homo sapiens GN=HEL-S-70 PE=2 SV=1	1.98511	1	1	1	806	89.266	5.26	127.4	106.3	132.1	70.4	89.1	74.6	121.933	78.0333	0.0107947
A8KAM8		Platelet-derived growth factor receptor beta OS=Homo sapiens PE=2 SV=1	1.53707	1	1	1	1106	123.839	4.98	120.2	113.7	132.4	67.1	73.1	93.5	122.1	77.9	0.0103254
Q6UY14	ADAMTSL4	ADAMTS-like protein 4 OS=Homo sapiens GN=ADAMTSL4 PE=1 SV=2	2.51397	2	2	2	1074	116.471	8.34	124.3	120.8	121.6	84.4	70	78.8	122.233	77.7333	0.00050221
P17936	IGFBP3	Insulin-like growth factor-binding protein 3 OS=Homo sapiens GN=IGFBP3 PE=1 SV=2	41.9244	12	36	12	291	31.654	8.69	121.3	108.7	138.2	81	63.2	87.5	122.733	77.2333	0.0153884
Q86YW5	TREML1	Trem-like transcript 1 protein OS=Homo sapiens GN=TREML1 PE=1 SV=2	5.14469	1	2	1	311	32.658	6.05	136	122.7	112.2	82.8	72.9	73.4	123.633	76.3667	0.00340572
Q15166	PON3	Serum paraoxonase/lactonase 3 OS=Homo sapiens GN=PON3 PE=1 SV=3	12.4294	4	13	2	354	39.582	5.41	149.9	104.1	120.1	76.2	68	81.7	124.7	75.3	0.0242493
P20023	CR2	Complement receptor type 2 OS=Homo sapiens GN=CR2 PE=1 SV=2	1.35528	1	1	1	1033	112.842	7.52	125.7	117.5	131.2	70	69.9	85.6	124.8	75.1667	0.00163748
A0A024R3E3	APOA1	Apolipoprotein A-I, isoform CRA_a OS=Homo sapiens GN=APOA1 PE=3 SV=1	64.4195	19	55	19	267	30.759	5.76	113.7	122.8	139.6	75.6	81.7	66.6	125.367	74.6333	0.00442295
Q14769	ufHSD2	Alpha-N-acetylglucosaminidase OS=Homo sapiens GN=ufHSD2 PE=4 SV=1	7.35524	4	4	1	639	71.982	6.37	118.3	101.5	156.6	80.3	71.4	71.8	125.467	74.5	0.0370207
P02753	RBP4	Retinol-binding protein 4 OS=Homo sapiens GN=RBP4 PE=1 SV=3	76.1194	12	274	12	201	22.995	6.07	143.1	127.6	107.2	73.6	77.4	71	125.967	74	0.00792417
A0A024R6N9	SERPINA5	Serpin peptidase inhibitor, clade A (Alpha-1 antiproteinase, antitrypsin), member 5, isoform CRA_a OS=Homo sapiens GN=SERPINA5 PE=3 SV=1	31.2808	12	70	12	406	45.646	9.26	124.6	123.4	131	77.2	71.7	72.2	126.333	73.7	5.72707e-05
Q9UBX1	CTSF	Cathepsin F OS=Homo sapiens GN=CTSF PE=1 SV=1	1.44628	1	1	1	484	53.332	8.22	144.2	111.9	123.6	70.3	67.9	82.1	126.567	73.4333	0.00696637
I3L504	EIF5A	Eukaryotic translation initiation factor 5A-1 OS=Homo sapiens GN=EIF5A PE=1 SV=1	6.45161	1	1	1	186	20.49	5.25	140.4	114.5	128	72.1	70.3	74.8	127.633	72.4	0.00189689
B2R815		cDNA, FLJ93695, highly similar to Homo sapiens serpin peptidase inhibitor, clade A (alpha-1 antiproteinase, antitrypsin), member 4 (SERPINA4), mRNA OS=Homo sapiens PE=2 SV=1	44.2623	18	139	18	427	48.495	7.75	138.2	122	125.1	69.7	69.3	75.7	128.433	71.5667	0.000452912
Q96K68		cDNA FLJ14473 fis, clone MAMMA1001080, highly similar to Homo sapiens SNC73 protein (SNC73) mRNA OS=Homo sapiens PE=2 SV=1	43.3198	16	214	1	494	53.054	6.86	106.8	119	165.3	73.9	71.4	63.5	130.367	69.6	0.0283362
P06727	APOA4	Apolipoprotein A-IV OS=Homo sapiens GN=APOA4 PE=1 SV=3	77.7778	37	598	37	396	45.371	5.38	129.5	137.9	125.2	61.8	60	85.6	130.867	69.1333	0.00241822
A0A0R7FJH5	F12	Coagulation factor XII OS=Homo sapiens GN=F12 PE=3 SV=1	32.0325	14	74	1	615	67.817	7.8	109	124.3	160	59.7	49.2	97.9	131.1	68.9333	0.0424097
P06331	IGHV4-34	Immunoglobulin heavy variable 4-34 OS=Homo sapiens GN=IGHV4-34 PE=1 SV=2	37.3984	3	16	1	123	13.806	9.33	102.8	124.3	168.1	71.3	82.7	50.9	131.733	68.3	0.0410792
C9J1B5	GOLGA8B	Golgin subfamily A member 8B OS=Homo sapiens GN=GOLGA8B PE=4 SV=2	2.05371	1	1	1	633	70.274	6.16	139.9	148.7	117.1	64.4	58.7	71.3	135.233	64.8	0.00222003
B4E1B2		cDNA FLJ53691, highly similar to Serotransferrin OS=Homo sapiens PE=2 SV=1	56.0472	38	104	3	678	74.783	7.12	119.1	122.7	208.4	50.7	43.8	55.3	150.067	49.9333	0.0270599
A0A0K0K1H8	HEL-S-71p	Epididymis secretory sperm binding protein Li 71p OS=Homo sapiens GN=HEL-S-71p PE=2 SV=1	55.0143	38	106	3	698	77.03	7.21	129	118.1	212.3	48.2	45.2	47.2	153.133	46.8667	0.0233675
Q13747		Alpha-1 antitrypsin (Fragment) OS=Homo sapiens PE=2 SV=1	81.7259	24	699	1	197	22.814	6.55	22.4	20.7	35.8	123.5	279.9	117.7	26.3	173.7	0.0506739
A0A024R6I7	SERPINA1	Alpha-1-antitrypsin OS=Homo sapiens GN=SERPINA1 PE=1 SV=1	72.2488	35	1028	2	418	46.679	5.59	51.9	43.3	41.3	50.1	366.3	47.2	45.5	154.533	0.361533
P00738	HP	Haptoglobin OS=Homo sapiens GN=HP PE=1 SV=1	56.1576	28	883	1	406	45.177	6.58	39.4	72.3	55.3	165.3	196	71.8	55.6667	144.367	0.0827965
P02750	LRG1	Leucine-rich alpha-2-glycoprotein OS=Homo sapiens GN=LRG1 PE=1 SV=2	50.1441	13	208	1	347	38.154	6.95	29.8	102.6	38.8	82.9	225.2	120.7	57.0667	142.933	0.150286
P00739	HPR	Haptoglobin-related protein OS=Homo sapiens GN=HPR PE=2 SV=2	51.7241	21	401	7	348	39.005	7.09	44.4	74.4	52.8	127.2	241.8	59.5	57.2	142.833	0.187629
Q68CK4	HMFT1766	Leucine-rich alpha-2-glycoprotein OS=Homo sapiens GN=HMFT1766 PE=2 SV=1	50.1441	13	208	1	347	38.144	6.95	70.2	36.2	69	173.9	79.6	171.2	58.4667	141.567	0.0651322
Q2L9S7	AAT	Alpha-1-antitrypsin MBrescia variant (Fragment) OS=Homo sapiens GN=AAT PE=3 SV=1	89.8876	9	195	1	89	10.714	6.16	63.8	47.4	67.9	113.3	202.7	104.9	59.7	140.3	0.0649759
Q14403		Gamma-G globin (Fragment) OS=Homo sapiens PE=2 SV=1	14.8387	2	11	1	155	16.959	6.38	61.6	68.5	52.4	144.3	193.6	79.6	60.8333	139.167	0.0785357
Q86YQ1	HBA2	Hemoglobin alpha-2 (Fragment) OS=Homo sapiens GN=HBA2 PE=3 SV=1	54.9451	4	9	1	91	9.665	9.25	106.4	44.6	37.4	90	254.5	67.1	62.8	137.2	0.302732
P49720	PSMB3	Proteasome subunit beta type-3 OS=Homo sapiens GN=PSMB3 PE=1 SV=2	21.4634	3	5	3	205	22.933	6.55	61.1	61	83.3	132	84.1	178.5	68.4667	131.533	0.0893139
Q13707	ACTA2	ACTA2 protein (Fragment) OS=Homo sapiens GN=ACTA2 PE=3 SV=1	31.5152	8	32	1	330	36.783	5.35	52.6	78	75.4	82	243.2	68.8	68.6667	131.333	0.330616
B4DNW0		cDNA FLJ60317, highly similar to Aminoacylase-1 (EC 3.5.1.14) OS=Homo sapiens PE=2 SV=1	23.8956	10	13	10	498	55.959	7.03	85.3	53.4	76.6	116.8	93.6	174.2	71.7667	128.2	0.0937734
A0A0B4J1R4	HPD	4-hydroxyphenylpyruvate dioxygenase OS=Homo sapiens GN=HPD PE=1 SV=1	22.1374	7	11	7	393	44.936	7.01	75.5	60.8	85	115	101.3	162.4	73.7667	126.233	0.0570244
Q59FJ0		Proteasome subunit beta type (Fragment) OS=Homo sapiens PE=2 SV=1	6.0241	1	2	1	249	27.797	9.33	73.5	57.5	90.5	135.9	89.2	153.4	73.8333	126.167	0.0707832
P25789	PSMA4	Proteasome subunit alpha type-4 OS=Homo sapiens GN=PSMA4 PE=1 SV=1	10.3448	3	4	3	261	29.465	7.72	89.3	57.8	74.8	130.1	86.5	161.7	73.9667	126.1	0.091958
A8K6Z6		cDNA FLJ78262, highly similar to Homo sapiens semenogelin II (SEMG2), mRNA OS=Homo sapiens PE=2 SV=1	1.37457	1	1	1	582	65.603	9.07	74.3	38.7	109.3	88.5	105.6	183.7	74.1	125.933	0.22009
P25786	PSMA1	Proteasome subunit alpha type-1 OS=Homo sapiens GN=PSMA1 PE=1 SV=1	16.73	4	6	4	263	29.537	6.61	79.3	54.8	88.6	127.7	90.4	159.1	74.2333	125.733	0.0817928
G3V5Z7	PSMA6	Proteasome subunit alpha type OS=Homo sapiens GN=PSMA6 PE=1 SV=1	28.9683	6	8	6	252	28.129	6.76	64.6	72.5	87.5	137	80.4	158.1	74.8667	125.167	0.105684
E7EX59	PCCB	Propionyl-CoA carboxylase beta chain, mitochondrial OS=Homo sapiens GN=PCCB PE=1 SV=1	7.36842	3	3	3	570	61.615	7.99	103.4	52.3	69.4	119.5	109.1	146.3	75.0333	124.967	0.0554901
Q6ICS1	REG1B	Putative uncharacterized protein REG1B (Fragment) OS=Homo sapiens GN=REG1B PE=2 SV=1	16.8675	2	2	1	166	18.653	5.95	69.1	44.7	112	158.3	93.7	122.2	75.2667	124.733	0.142384
P20618	PSMB1	Proteasome subunit beta type-1 OS=Homo sapiens GN=PSMB1 PE=1 SV=2	29.0456	5	7	5	241	26.472	8.13	76.4	64	90	133.2	85.2	151.1	76.8	123.167	0.0924617
A0A0K0K1K4	HEL-S-276	Proteasome subunit alpha type OS=Homo sapiens GN=HEL-S-276 PE=2 SV=1	35.4839	7	11	7	248	27.87	8.46	91.4	57	83.7	126.1	87.2	154.6	77.3667	122.633	0.110377
B2R4R0	HIST1H4H	Histone H4 OS=Homo sapiens GN=HIST1H4H PE=2 SV=1	9.70874	1	2	1	103	11.36	11.36	78.5	58.4	97.9	125.7	100.2	139.2	78.2667	121.7	0.0546826
A0A087WTU6	TMPRSS4	Transmembrane protease serine 4 OS=Homo sapiens GN=TMPRSS4 PE=1 SV=1	3.7594	1	2	1	399	43.998	5.08	105.8	60.3	69.3	95.4	139.2	130	78.4667	121.533	0.0891199
Q96H15	TIMD4	T-cell immunoglobulin and mucin domain-containing protein 4 OS=Homo sapiens GN=TIMD4 PE=1 SV=2	5.55556	1	1	1	378	41.552	6.1	74.6	70.8	93.6	105.9	98.5	156.6	79.6667	120.333	0.106306
B2R4F3		cDNA, FLJ92068, highly similar to Homo sapiens Rho GDP dissociation inhibitor (GDI) beta (ARHGDIB),mRNA OS=Homo sapiens PE=2 SV=1	6.46766	1	1	1	201	22.948	5.3	54.6	100.3	84.8	117.8	102.4	140	79.9	120.067	0.0809278
P04275	VWF	von Willebrand factor OS=Homo sapiens GN=VWF PE=1 SV=4	39.3175	81	247	4	2813	309.058	5.48	80	73.7	87	102.8	147	109.5	80.2333	119.767	0.0504081
P00995	SPINK1	Serine protease inhibitor Kazal-type 1 OS=Homo sapiens GN=SPINK1 PE=1 SV=2	40.5063	2	2	2	79	8.501	7.61	71.3	80.6	89	113.9	77.7	167.6	80.3	119.733	0.212509
P80511	S100A12	Protein S100-A12 OS=Homo sapiens GN=S100A12 PE=1 SV=2	16.3043	2	3	2	92	10.569	6.25	74.8	80.8	86.3	95.4	114.6	148	80.6333	119.333	0.0695818
B7ZLM6	XPNPEP2	X-prolyl aminopeptidase (Aminopeptidase P) 2, membrane-bound OS=Homo sapiens GN=XPNPEP2 PE=2 SV=1	1.92878	1	1	1	674	75.567	6.04	74.9	80.2	87.1	107.5	160.9	89.5	80.7333	119.3	0.150566
Q5D862	FLG2	Filaggrin-2 OS=Homo sapiens GN=FLG2 PE=1 SV=1	0.460059	1	1	1	2391	247.928	8.31	85.5	82.3	76	110.3	95.5	150.4	81.2667	118.733	0.0874291
Q9UKX2	MYH2	Myosin-2 OS=Homo sapiens GN=MYH2 PE=1 SV=1	1.23648	2	3	1	1941	222.906	5.82	91.6	60.8	92.1	112.6	103.9	138.9	81.5	118.467	0.0664344
A0A140VK69		Aspartate aminotransferase OS=Homo sapiens PE=2 SV=1	23.4867	9	12	9	413	46.219	7.01	82.3	61.6	101.7	116.1	93.3	145	81.8667	118.133	0.127678
A0A024RAI1	ACTR3	ARP3 actin-related protein 3 homolog (Yeast), isoform CRA_a OS=Homo sapiens GN=ACTR3 PE=3 SV=1	2.87081	1	1	1	418	47.341	5.88	104.5	52.4	92	88.7	172.2	90.3	82.9667	117.067	0.343006
Q9HD89	RETN	Resistin OS=Homo sapiens GN=RETN PE=1 SV=1	10.1852	1	1	1	108	11.411	6.86	110.1	54.8	85.4	117.4	100.5	131.8	83.4333	116.567	0.145691
L8E853	VWF	von Willebrand factor OS=Homo sapiens GN=VWF PE=4 SV=1	38.7477	78	237	1	2715	298.181	5.48	82.7	73.7	94.2	86.4	139.6	123.5	83.5333	116.5	0.121745
A8K9M4		cDNA FLJ75539, highly similar to Homo sapiens apolipoprotein A-V (APOA5) gene OS=Homo sapiens PE=2 SV=1	6.28415	1	1	1	366	41.157	6.43	93	61.4	97.1	102.5	155.6	90.5	83.8333	116.2	0.231484
B2R6P3		cDNA, FLJ93047, highly similar to Homo sapiens matrix metallopeptidase 14 (membrane-inserted) (MMP14), mRNA OS=Homo sapiens PE=2 SV=1	1.54639	1	1	1	582	65.807	7.77	65.2	76.9	109.6	107.4	124.8	116.1	83.9	116.1	0.0860188
P28070	PSMB4	Proteasome subunit beta type-4 OS=Homo sapiens GN=PSMB4 PE=1 SV=4	24.6212	4	7	4	264	29.185	5.97	84.1	63.8	104.2	113.8	97.9	136.3	84.0333	116	0.118518
Q53G35		Phosphoglycerate mutase (Fragment) OS=Homo sapiens PE=2 SV=1	5.51181	1	1	1	254	28.814	7.18	93.8	74.7	83.6	92.8	116.1	139.1	84.0333	116	0.0915549
B2R6Q2		Alkaline phosphatase OS=Homo sapiens PE=2 SV=1	2.09924	1	1	1	524	57.244	6.57	109.1	60.6	82.5	103.7	109.4	134.6	84.0667	115.9	0.133307
B2RCQ6		cDNA, FLJ96222, highly similar to Homo sapiens betaine-homocysteine methyltransferase (BHMT), mRNA OS=Homo sapiens PE=2 SV=1	13.7931	3	4	3	406	44.94	7.24	101.7	65.6	85.2	125.5	111.4	110.6	84.1667	115.833	0.0512012
P59665	DEFA1	Neutrophil defensin 1 OS=Homo sapiens GN=DEFA1 PE=1 SV=1	19.1489	2	2	2	94	10.194	6.99	74.1	73.2	105.2	128.1	90.9	128.5	84.1667	115.833	0.124199
A2V838	AGXT	Serine--pyruvate aminotransferase OS=Homo sapiens GN=AGXT PE=2 SV=1	4.08163	1	1	1	392	42.924	8.54	108.1	65.9	80.9	96.4	138.9	109.8	84.9667	115.033	0.162835
Q13228	SELENBP1	Selenium-binding protein 1 OS=Homo sapiens GN=SELENBP1 PE=1 SV=2	35.5932	12	17	12	472	52.358	6.37	92	74.1	91.4	103.2	131.7	107.6	85.8333	114.167	0.0460172
Q9ULH1	ASAP1	Arf-GAP with SH3 domain, ANK repeat and PH domain-containing protein 1 OS=Homo sapiens GN=ASAP1 PE=1 SV=4	2.74579	1	1	1	1129	125.42	7.31	74.2	98.4	85.7	180.2	110	51.6	86.1	113.933	0.502664
P12109	COL6A1	Collagen alpha-1(VI) chain OS=Homo sapiens GN=COL6A1 PE=1 SV=3	7.19844	5	6	5	1028	108.462	5.43	100.3	78.6	79.4	104.3	156.4	81	86.1	113.9	0.300427
P25788	PSMA3	Proteasome subunit alpha type-3 OS=Homo sapiens GN=PSMA3 PE=1 SV=2	16.4706	3	5	3	255	28.415	5.33	103.4	67.4	88.4	104.6	84.8	151.4	86.4	113.6	0.290228
X5CMJ9	PSM8	Proteasome subunit beta type OS=Homo sapiens GN=PSM8 PE=3 SV=1	12.3188	3	4	3	276	30.335	7.43	89.6	73.8	96.7	109.7	101.5	128.7	86.7	113.3	0.0647874
G3V2W1	SERPINA10	Protein Z-dependent protease inhibitor OS=Homo sapiens GN=SERPINA10 PE=1 SV=1	27.4793	13	44	1	484	55.078	7.64	109.2	78.8	72.3	156.3	84.6	98.8	86.7667	113.233	0.344187
Q03001	DST	Dystonin OS=Homo sapiens GN=DST PE=1 SV=4	0.0924703	1	1	1	7570	860.127	5.25	66.4	71.5	122.5	140.5	88.8	110.2	86.8	113.167	0.322146
A0A024RDT4	LCP1	Lymphocyte cytosolic protein 1 (L-plastin), isoform CRA_a OS=Homo sapiens GN=LCP1 PE=4 SV=1	57.7352	27	68	27	627	70.244	5.43	91.6	74.7	95.8	108.2	100.7	129	87.3667	112.633	0.0764525
G9K388	YWHAE/FAM22A	YWHAE/FAM22A fusion protein (Fragment) OS=Homo sapiens GN=YWHAE/FAM22A fusion PE=2 SV=1	10.9375	4	6	2	384	41.198	4.97	86.9	77.3	98.7	91.4	105.4	140.3	87.6333	112.367	0.192586
B3VL17		Beta globin (Fragment) OS=Homo sapiens PE=3 SV=1	93.3333	14	152	4	105	11.475	6.37	89.8	87.4	85.8	98.8	158.9	79.3	87.6667	112.333	0.361824
P04040	CAT	Catalase OS=Homo sapiens GN=CAT PE=1 SV=3	53.8899	24	72	24	527	59.719	7.39	93.7	78.1	92.8	108.7	97.6	129.2	88.2	111.833	0.0885455
Q9Y6R7	FCGBP	IgGFc-binding protein OS=Homo sapiens GN=FCGBP PE=1 SV=3	30.3608	66	196	66	5405	571.639	5.34	97.4	80.2	87.1	134.8	93.5	107.1	88.2333	111.8	0.147328
P36222	CHI3L1	Chitinase-3-like protein 1 OS=Homo sapiens GN=CHI3L1 PE=1 SV=2	33.9426	10	13	10	383	42.598	8.46	102.2	76.3	86.2	101.8	141.8	91.7	88.2333	111.767	0.239786
B4DUP2		cDNA FLJ56155, highly similar to UTP--glucose-1-phosphate uridylyltransferase 2 (EC 2.7.7.9) OS=Homo sapiens PE=2 SV=1	9.8646	4	4	4	517	57.755	8.13	94.7	62	108.3	115.1	88.2	131.8	88.3333	111.7	0.279814
A8K7G6		cDNA FLJ75763, highly similar to Homo sapiens regenerating islet-derived 1 alpha (pancreatic stone protein, pancreatic thread protein) (REG1A), mRNA OS=Homo sapiens PE=2 SV=1	22.8916	3	4	2	166	18.72	5.53	78.8	72.5	114.4	142.5	77.9	114	88.5667	111.467	0.371888
Q8TCZ8	APOE	Apolipoprotein E (Fragment) OS=Homo sapiens GN=APOE PE=4 SV=1	59.6491	4	26	1	57	6.66	9.98	140	89.8	36.2	146	160.2	27.8	88.6667	111.333	0.682978
P02776	PF4	Platelet factor 4 OS=Homo sapiens GN=PF4 PE=1 SV=2	35.6436	4	7	4	101	10.838	8.62	65.8	90.8	110	115.5	102.4	115.4	88.8667	111.1	0.175303
D9YZU5	HBB	Beta-globin OS=Homo sapiens GN=HBB PE=3 SV=1	84.3537	13	220	1	147	15.988	7.28	93.5	87.8	85.6	91.9	165.9	75.3	88.9667	111.033	0.473954
Q9H804		cDNA FLJ14022 fis, clone HEMBA1003538, weakly similar to COMPLEMENT C1R COMPONENT (EC 3.4.21.41) OS=Homo sapiens PE=2 SV=1	25.1142	9	33	1	438	47.964	7.46	73.7	97.1	96.3	107.5	118.5	106.9	89.0333	110.967	0.0622255
A0A140VK27		Leukotriene A(4) hydrolase OS=Homo sapiens PE=2 SV=1	26.5139	14	25	14	611	69.241	6.18	89.4	72.7	105.2	104.8	97.5	130.4	89.1	110.9	0.186633
X6R8F3	LCN2	Neutrophil gelatinase-associated lipocalin OS=Homo sapiens GN=LCN2 PE=1 SV=1	40	6	13	6	200	22.774	8.5	83.3	78.3	105.8	116.7	89	126.8	89.1333	110.833	0.198991
Q8IZ83	ALDH16A1	Aldehyde dehydrogenase family 16 member A1 OS=Homo sapiens GN=ALDH16A1 PE=1 SV=2	2.61845	1	1	1	802	85.074	6.79	104.1	73.7	89.8	124.3	112.3	95.8	89.2	110.8	0.147675
B2RBZ5		cDNA, FLJ95778, highly similar to Homo sapiens serpin peptidase inhibitor, clade A (alpha-1 antiproteinase, antitrypsin), member 10 (SERPINA10), mRNA OS=Homo sapiens PE=2 SV=1	29.955	13	44	1	444	50.642	8.51	57.8	101.4	108.8	74.4	117.9	139.7	89.3333	110.667	0.440402
B5BU38	ANXA1	Annexin OS=Homo sapiens GN=ANXA1 PE=2 SV=1	24.2775	6	6	6	346	38.656	7.02	90.3	73.8	104.3	110.3	90.4	130.9	89.4667	110.533	0.223615
A0A0C4DFU2	SOD2	Superoxide dismutase OS=Homo sapiens GN=SOD2 PE=1 SV=1	37.8378	7	18	7	222	24.735	8.25	84.2	65.7	118.6	96.8	102	132.7	89.5	110.5	0.333798
A0A068LKQ2		Ig heavy chain variable region (Fragment) OS=Homo sapiens PE=2 SV=1	13.3333	1	3	1	120	13.15	9.07	87.7	112.6	68.5	134.7	141.3	55.1	89.6	110.367	0.533315
P29401	TKT	Transketolase OS=Homo sapiens GN=TKT PE=1 SV=3	24.7191	10	20	10	623	67.835	7.66	79.3	65.3	124.5	109.7	99.3	121.9	89.7	110.3	0.339692
Q9GZT8	NIF3L1	NIF3-like protein 1 OS=Homo sapiens GN=NIF3L1 PE=1 SV=2	6.89655	2	3	2	377	41.942	6.65	87	79.7	102.6	113.2	103.3	114.2	89.7667	110.233	0.0544307
V9HWJ1	HEL-S-64p	Glutathione synthetase OS=Homo sapiens GN=HEL-S-64p PE=2 SV=1	21.308	7	10	7	474	52.352	5.92	93.9	78.3	97.2	106	102	122.6	89.8	110.2	0.076356
H6VRG1	KRT1	Keratin 1 OS=Homo sapiens GN=KRT1 PE=3 SV=1	42.4806	30	170	27	645	66.086	8.12	90.5	93.5	85.5	81.6	80.9	168	89.8333	110.167	0.522009
A2J1N5		Rheumatoid factor RF-ET6 (Fragment) OS=Homo sapiens PE=2 SV=1	30.8511	3	8	1	94	10.443	9.13	78.2	97.9	93.8	97.8	135.4	97	89.9667	110.067	0.224919
P02452	COL1A1	Collagen alpha-1(I) chain OS=Homo sapiens GN=COL1A1 PE=1 SV=5	1.98087	2	2	2	1464	138.857	5.8	106.3	67.3	96.3	117	103.4	109.7	89.9667	110.033	0.179182
A0N071	HBD	Delta globin OS=Homo sapiens GN=HBD PE=3 SV=1	84.3537	12	149	5	147	16.045	8.05	66.7	105.3	98.1	119.8	130.3	79.8	90.0333	109.967	0.362696
B2R892		cDNA, FLJ93793, highly similar to Homo sapiens creatine kinase, muscle (CKM), mRNA OS=Homo sapiens PE=2 SV=1	30.1837	8	11	8	381	43.002	7.44	101.5	83.4	87.3	100.9	86.6	140.2	90.7333	109.233	0.336204
I3L3W6	CAMTA2	Calmodulin-binding transcription activator 2 OS=Homo sapiens GN=CAMTA2 PE=1 SV=1	1.24275	1	1	1	1207	132.044	7.3	82.6	101.8	87.9	118.1	100.3	109.4	90.7667	109.267	0.0739716
Q8NFF5	FLAD1	FAD synthase OS=Homo sapiens GN=FLAD1 PE=1 SV=1	4.77002	1	5	1	587	65.224	6.93	87.7	62.2	122.5	121.5	105.9	100.3	90.8	109.233	0.377567
A0A140VK56		Transaldolase OS=Homo sapiens PE=2 SV=1	13.0564	4	7	4	337	37.516	6.81	90	78.2	104.5	102.7	110.6	114	90.9	109.1	0.0936626
Q4TZM4	HBB	Hemoglobin beta chain (Fragment) OS=Homo sapiens GN=HBB PE=3 SV=1	89.1089	9	137	2	101	11.016	6.52	71.8	116.9	84	116	138.4	72.8	90.9	109.067	0.482556
P05089	ARG1	Arginase-1 OS=Homo sapiens GN=ARG1 PE=1 SV=2	3.41615	1	1	1	322	34.713	7.21	90.8	83.8	98.6	99.2	87.3	140.2	91.0667	108.9	0.342737
A0A024RA52	PSMA2	Proteasome subunit alpha type OS=Homo sapiens GN=PSMA2 PE=1 SV=1	20.0855	3	5	3	234	25.882	7.43	113.4	71.3	88.9	107.1	90.8	128.5	91.2	108.8	0.343009
P07998	RNASE1	Ribonuclease pancreatic OS=Homo sapiens GN=RNASE1 PE=1 SV=4	14.7436	1	2	1	156	17.633	8.79	84.8	104.5	84.4	129.7	109.7	87	91.2333	108.8	0.278043
P02533	KRT14	Keratin, type I cytoskeletal 14 OS=Homo sapiens GN=KRT14 PE=1 SV=4	34.7458	15	28	6	472	51.529	5.16	83.6	102.3	88.3	94.5	87.5	143.9	91.4	108.633	0.406987
Q9NRN5	OLFML3	Olfactomedin-like protein 3 OS=Homo sapiens GN=OLFML3 PE=2 SV=1	4.4335	1	2	1	406	45.981	6.57	127.5	75.3	71.4	87	150.9	87.8	91.4	108.567	0.570871
Q6LDG4	C2	Complement protein (Fragment) OS=Homo sapiens GN=C2 PE=4 SV=1	30.1587	2	5	1	63	7.159	7.18	106.8	76.1	91.5	108.2	118.7	98.7	91.4667	108.533	0.181965
D3DP16	FGG	Fibrinogen gamma chain, isoform CRA_a OS=Homo sapiens GN=FGG PE=4 SV=1	75.7485	26	529	1	334	37.714	6.29	80.7	89.4	104.5	126.8	94.2	104.4	91.5333	108.467	0.227055
V9GYM3	APOA2	Apolipoprotein A-II OS=Homo sapiens GN=APOA2 PE=1 SV=1	30.8271	5	30	5	133	14.905	8.27	83.6	93.2	98.1	96	107.1	121.9	91.6333	108.333	0.124964
P12429	ANXA3	Annexin A3 OS=Homo sapiens GN=ANXA3 PE=1 SV=3	11.7647	3	3	3	323	36.353	5.92	100.3	68.5	106.1	105.4	102.8	116.8	91.6333	108.333	0.250991
Q8WWZ8	OIT3	Oncoprotein-induced transcript 3 protein OS=Homo sapiens GN=OIT3 PE=1 SV=2	8.80734	5	5	5	545	59.983	5.58	95.1	78.1	102.2	106.9	100.3	117.4	91.8	108.2	0.13293
P25815	S100P	Protein S100-P OS=Homo sapiens GN=S100P PE=1 SV=2	10.5263	1	2	1	95	10.393	4.88	85.8	80.2	109.8	107.3	84.4	132.6	91.9333	108.1	0.385738
A0A584	TCRBV21S3A2N2T	V_segment translation product (Fragment) OS=Homo sapiens GN=TCRBV21S3A2N2T PE=4 SV=1	11.3043	1	1	1	115	12.735	8.16	58.5	88.4	129.8	127.4	87.4	108.4	92.2333	107.733	0.548484
A0A0C4DG49	PVR	Poliovirus receptor OS=Homo sapiens GN=PVR PE=1 SV=1	15.3477	5	8	5	417	45.292	6.52	84.2	87	105.9	115.6	93.1	114.2	92.3667	107.633	0.200475
S4R471	AMBP	Protein AMBP (Fragment) OS=Homo sapiens GN=AMBP PE=1 SV=1	48.7047	9	128	1	193	21.426	7.25	89.7	73.8	113.8	111.3	107	104.4	92.4333	107.567	0.268962
B4E1Z4		Uncharacterized protein OS=Homo sapiens PE=1 SV=1	56.7141	67	952	18	1266	140.853	7.18	85.2	96.6	95.6	100.8	107.4	114.3	92.4667	107.5	0.0479613
B2R825		Alpha-1,4 glucan phosphorylase OS=Homo sapiens PE=2 SV=1	3.77804	3	3	3	847	97.006	7.3	103.9	75.3	98.2	100.6	108.5	113.4	92.4667	107.5	0.188778
P20933	AGA	N(4)-(beta-N-acetylglucosaminyl)-L-asparaginase OS=Homo sapiens GN=AGA PE=1 SV=2	9.53757	2	2	2	346	37.184	6.28	90.1	80.7	106.6	112.1	105.7	104.7	92.4667	107.5	0.130399
H0YFM0	CD163	Scavenger receptor cysteine-rich type 1 protein M130 (Fragment) OS=Homo sapiens GN=CD163 PE=1 SV=1	7.29927	1	1	1	137	15.114	8.48	88.3	78.3	110.9	117.4	108.5	96.6	92.5	107.5	0.257531
V9HW90	HEL-75	Epididymis luminal protein 75 OS=Homo sapiens GN=HEL-75 PE=2 SV=1	18.7739	6	8	6	522	56.221	8.5	85.7	75.7	116.4	111	86.2	125	92.6	107.4	0.425369
A0A024R2G1	CRELD1	Cysteine-rich with EGF-like domains 1, isoform CRA_b OS=Homo sapiens GN=CRELD1 PE=4 SV=1	2.61905	1	1	1	420	45.377	4.87	97.6	92.7	88	105.2	95	121.4	92.7667	107.2	0.152065
B9EJA8	MRC1L1	Mannose receptor, C type 1-like 1 OS=Homo sapiens GN=MRC1L1 PE=2 SV=1	18.544	20	26	20	1456	165.918	6.51	105	79.8	93.6	110.3	96.2	115.2	92.8	107.233	0.193592
A0A024R930	PRG4	Proteoglycan 4, isoform CRA_a OS=Homo sapiens GN=PRG4 PE=4 SV=1	13.4615	15	42	13	1404	150.984	9.5	89.2	94.3	94.9	105.5	120.6	95.5	92.8	107.2	0.12788
D3DVW9	PTPNS1	Protein tyrosine phosphatase, non-receptor type substrate 1, isoform CRA_a OS=Homo sapiens GN=PTPNS1 PE=4 SV=1	4.36508	1	1	1	504	54.891	6.98	95.6	71.1	112.1	98.5	111.9	110.7	92.9333	107.033	0.327679
P10645	CHGA	Chromogranin-A OS=Homo sapiens GN=CHGA PE=1 SV=7	11.3786	4	5	4	457	50.658	4.6	88.4	72.7	117.9	97	100.5	123.6	93	107.033	0.420791
P81605	DCD	Dermcidin OS=Homo sapiens GN=DCD PE=1 SV=2	12.7273	2	3	2	110	11.277	6.54	96.6	88.2	94.5	78.8	97.5	144.4	93.1	106.9	0.521699
Q59G88		Coronin (Fragment) OS=Homo sapiens PE=3 SV=1	2.86738	1	1	1	558	59.576	8.13	84.5	83.4	111.6	99	105.6	116	93.1667	106.867	0.26066
Q12841	FSTL1	Follistatin-related protein 1 OS=Homo sapiens GN=FSTL1 PE=1 SV=1	7.46753	3	4	3	308	34.963	5.52	93.8	84.6	101.2	99.3	92.4	128.8	93.2	106.833	0.324674
P35527	KRT9	Keratin, type I cytoskeletal 9 OS=Homo sapiens GN=KRT9 PE=1 SV=3	46.7095	25	117	24	623	62.027	5.24	94.7	100.1	84.8	82.4	78.8	159.1	93.2	106.767	0.636491
P35908	KRT2	Keratin, type II cytoskeletal 2 epidermal OS=Homo sapiens GN=KRT2 PE=1 SV=2	41.9405	27	122	20	639	65.393	8	85.3	86.9	107.8	96.1	94.3	129.6	93.3333	106.667	0.381622
B2RB23		cDNA, FLJ95265, highly similar to Homo sapiens acetyl-Coenzyme A acyltransferase 2 (mitochondrial 3-oxoacyl-Coenzyme A thiolase) (ACAA2), nuclear gene encoding mitochondrial protein, mRNA OS=Homo sapiens PE=2 SV=1	12.0907	3	3	3	397	41.983	8.25	125.3	73.5	81.3	110	102.8	107.2	93.3667	106.667	0.459312
Q9ULV0	MYO5B	Unconventional myosin-Vb OS=Homo sapiens GN=MYO5B PE=1 SV=3	0.378788	1	2	1	1848	213.538	7.2	85.6	113	81.5	142.1	110.7	67	93.3667	106.6	0.609509
A0A0K2BMD8	HBA2	Mutant hemoglobin alpha 2 globin chain OS=Homo sapiens GN=HBA2 PE=3 SV=1	71.831	10	159	5	142	15.248	8.68	60	126.3	94	138	112.8	68.9	93.4333	106.567	0.66148
A0A024QZP2	SFTPA1	Surfactant, pulmonary-associated protein A1, isoform CRA_b OS=Homo sapiens GN=SFTPA1 PE=4 SV=1	19.3548	3	4	3	248	26.226	5	100.8	89.5	90.2	116.6	101.3	101.6	93.5	106.5	0.105418
Q59EN5		Prosaposin variant (Fragment) OS=Homo sapiens PE=2 SV=1	5.66038	3	3	3	530	58.688	5.1	83.4	100.7	96.4	114.3	91.1	114.1	93.5	106.5	0.234353
A0A024R1A3	UBE1	Testicular secretory protein Li 63 OS=Homo sapiens GN=UBE1 PE=2 SV=1	1.70132	1	1	1	1058	117.774	5.76	82.4	88.7	110.1	104.8	115.7	98.3	93.7333	106.267	0.270089
A0A1B0GU03		Uncharacterized protein OS=Homo sapiens PE=1 SV=1	25.0859	10	22	10	582	62.662	7.77	98.2	84.4	98.8	112.2	99.7	106.6	93.8	106.167	0.105453
Q6AZW6	ATF6B	Activating transcription factor 6 beta OS=Homo sapiens GN=ATF6B PE=2 SV=1	1.70697	1	2	1	703	76.673	6.27	103.8	83.7	94.2	104.6	106.2	107.5	93.9	106.1	0.105989
V9HWH1	HEL57	Epididymis luminal protein 57 OS=Homo sapiens GN=HEL57 PE=2 SV=1	19.2612	5	7	5	379	42.715	6.28	84.1	88.6	109	117.3	91	109.9	93.9	106.067	0.328986
P15085	CPA1	Carboxypeptidase A1 OS=Homo sapiens GN=CPA1 PE=1 SV=2	4.77327	2	2	2	419	47.111	5.76	123.6	74.5	83.7	109	97.2	112.1	93.9333	106.1	0.482622
P22692	IGFBP4	Insulin-like growth factor-binding protein 4 OS=Homo sapiens GN=IGFBP4 PE=1 SV=2	31.7829	6	9	6	258	27.915	7.15	102.2	80.6	99.1	101.7	107.9	108.5	93.9667	106.033	0.163737
Q9BYE9	CDHR2	Cadherin-related family member 2 OS=Homo sapiens GN=CDHR2 PE=1 SV=2	13.2824	14	24	14	1310	141.455	4.5	73.5	79.5	129	72.5	120.8	124.7	94	106	0.647475
B7Z6C2		cDNA FLJ50663, highly similar to Phosphoglucomutase-1 (EC 5.4.2.2) OS=Homo sapiens PE=2 SV=1	2.06897	1	1	1	580	63.71	5.92	85.3	76.8	119.9	96.9	100	121	94	105.967	0.475132
A0A087WXL1	FOLR3	Folate receptor gamma OS=Homo sapiens GN=FOLR3 PE=1 SV=1	3.26531	1	1	1	245	27.866	7.66	85.4	99.8	96.9	93.3	113.6	111	94.0333	105.967	0.198292
A0A0S2Z3Y1	LGALS3BP	Lectin galactoside-binding soluble 3 binding protein isoform 1 (Fragment) OS=Homo sapiens GN=LGALS3BP PE=2 SV=1	35.7265	14	37	14	585	65.289	5.27	95.9	81.2	105	128.5	85.3	104	94.0333	105.933	0.452151
B4DJQ5		cDNA FLJ59211, highly similar to Glucosidase 2 subunit beta OS=Homo sapiens PE=2 SV=1	1.86916	1	1	1	535	60.096	4.42	91.4	86.2	104.5	112.4	92.2	113.2	94.0333	105.933	0.246162
P07360	C8G	Complement component C8 gamma chain OS=Homo sapiens GN=C8G PE=1 SV=3	58.4158	11	111	11	202	22.264	8.31	85.4	101	95.9	98.6	108.5	110.5	94.1	105.867	0.116158
P00338	LDHA	L-lactate dehydrogenase A chain OS=Homo sapiens GN=LDHA PE=1 SV=2	25.6024	9	12	8	332	36.665	8.27	88	85.6	108.8	99.3	106.1	112.1	94.1333	105.833	0.228745
A0A087X0P6	IGKV2D-29	Protein IGKV2D-29 OS=Homo sapiens GN=IGKV2D-29 PE=1 SV=1	47.0588	3	11	2	102	11.185	5.94	78.8	97.1	106.6	118.5	107.4	91.7	94.1667	105.867	0.357802
O14960	LECT2	Leukocyte cell-derived chemotaxin-2 OS=Homo sapiens GN=LECT2 PE=1 SV=2	5.96026	1	2	1	151	16.379	9.39	94	94.4	94.2	91.4	91.8	134.2	94.2	105.8	0.459872
P31151	S100A7	Protein S100-A7 OS=Homo sapiens GN=S100A7 PE=1 SV=4	10.8911	1	1	1	101	11.464	6.77	90.9	96.5	95.6	79.4	114.7	123	94.3333	105.7	0.446537
P05165	PCCA	Propionyl-CoA carboxylase alpha chain, mitochondrial OS=Homo sapiens GN=PCCA PE=1 SV=4	2.74725	2	2	2	728	80.008	7.52	106.3	65.1	112.1	90.9	105.1	120.6	94.5	105.533	0.553951
Q13867	BLMH	Bleomycin hydrolase OS=Homo sapiens GN=BLMH PE=1 SV=1	11.2088	4	5	4	455	52.528	6.27	84	84.1	115.7	105.2	90.6	120.4	94.6	105.4	0.471977
O15389	SIGLEC5	Sialic acid-binding Ig-like lectin 5 OS=Homo sapiens GN=SIGLEC5 PE=1 SV=1	1.81488	1	1	1	551	60.677	7.27	72.1	79.4	132.5	84.2	73	158.8	94.6667	105.333	0.762545
B4DUV1		Fibulin-1 OS=Homo sapiens PE=2 SV=1	46.6459	22	112	1	641	70.108	5.26	108.4	86.4	89.3	94.6	119.9	101.3	94.7	105.267	0.360505
B7Z1K5		Tubulin alpha chain OS=Homo sapiens PE=2 SV=1	6.35838	2	2	2	519	57.723	5.07	73	110	101.2	111.6	105.6	98.5	94.7333	105.233	0.423277
H7BZW5	ATG4C	Cysteine protease ATG4C (Fragment) OS=Homo sapiens GN=ATG4C PE=1 SV=2	16.3636	1	1	1	110	12.291	4.53	82.4	102.4	99.6	141.6	95.3	78.6	94.8	105.167	0.629151
F2RM37	F9	Coagulation factor IX OS=Homo sapiens GN=F9 p22 PE=2 SV=1	36.8764	15	81	15	461	51.711	5.47	90	98.8	95.9	115.1	99.1	101	94.9	105.067	0.14753
H0YJC6	LRMP	Lymphoid-restricted membrane protein (Fragment) OS=Homo sapiens GN=LRMP PE=1 SV=1	10.3093	1	1	1	97	11.051	5.85	62.2	76	146.9	105.3	83.4	126.2	95.0333	104.967	0.749208
Q86U17	SERPINA11	Serpin A11 OS=Homo sapiens GN=SERPINA11 PE=2 SV=2	9.95261	5	8	5	422	46.959	7.68	102.1	90.9	92.4	112	105.8	96.8	95.1333	104.867	0.159382
A8K335		cDNA FLJ76254, highly similar to Homo sapiens gamma-glutamyl hydrolase (GGH), mRNA OS=Homo sapiens PE=2 SV=1	33.6478	9	25	9	318	36.024	7.42	95.8	89.4	100.3	104.5	94.3	115.8	95.1667	104.867	0.236313
P33908	MAN1A1	Mannosyl-oligosaccharide 1,2-alpha-mannosidase IA OS=Homo sapiens GN=MAN1A1 PE=1 SV=3	16.8453	12	20	12	653	72.922	6.47	89.7	100.4	95.6	106	102.6	105.7	95.2333	104.767	0.0438145
P05164	MPO	Myeloperoxidase OS=Homo sapiens GN=MPO PE=1 SV=1	6.44295	4	6	4	745	83.815	8.97	91.8	91.7	102.3	105.4	92.3	116.5	95.2667	104.733	0.293138
A0A087X089	CCL14	C-C motif chemokine OS=Homo sapiens GN=CCL14 PE=1 SV=1	6.08696	1	2	1	115	13.051	8.57	78.7	96.7	110.4	107.2	97.3	109.7	95.2667	104.733	0.394369
A0A024R8S5	P4HB	Protein disulfide-isomerase OS=Homo sapiens GN=P4HB PE=2 SV=1	11.6142	6	8	6	508	57.081	4.87	90	85.2	110.6	96.9	124.5	92.7	95.2667	104.7	0.497471
Q9NS71	GKN1	Gastrokine-1 OS=Homo sapiens GN=GKN1 PE=2 SV=3	7.03518	1	1	1	199	21.985	6.32	85	96	104.8	116.8	90.7	106.6	95.2667	104.7	0.377458
Q86UD1	OAF	Out at first protein homolog OS=Homo sapiens GN=OAF PE=2 SV=1	41.0256	7	19	7	273	30.669	6.84	95.7	94.9	95.5	108.8	102.4	102.8	95.3667	104.667	0.0111345
Q9HBR0	SLC38A10	Putative sodium-coupled neutral amino acid transporter 10 OS=Homo sapiens GN=SLC38A10 PE=1 SV=2	5.27256	3	4	3	1119	119.687	5.73	112.9	83.8	89.4	104.6	98.7	110.6	95.3667	104.633	0.386984
A0A0A0MSY4	DOCK9	Dedicator of cytokinesis protein 9 OS=Homo sapiens GN=DOCK9 PE=1 SV=1	0.713946	1	1	1	2101	240.192	7.62	139.3	73.5	73.4	80.4	124.5	109	95.4	104.633	0.735291
Q0IIN1	KRT77	Keratin 77 OS=Homo sapiens GN=KRT77 PE=2 SV=1	7.09343	4	37	2	578	61.764	5.85	101.6	90.4	94.2	82.2	90.1	141.4	95.4	104.567	0.652138
P02768	ALB	Serum albumin OS=Homo sapiens GN=ALB PE=1 SV=2	58.6207	34	84	34	609	69.321	6.28	90.7	92.1	103.5	102.1	106	105.7	95.4333	104.6	0.0968308
P22352	GPX3	Glutathione peroxidase 3 OS=Homo sapiens GN=GPX3 PE=1 SV=2	39.823	8	67	8	226	25.537	8.13	105.5	79.1	101.7	100.8	88.1	124.8	95.4333	104.567	0.537316
P48960	CD97	CD97 antigen OS=Homo sapiens GN=CD97 PE=1 SV=4	1.67665	1	1	1	835	91.809	6.87	112.9	94.8	79.1	114.7	115.1	83.4	95.6	104.4	0.572608
P09467	FBP1	Fructose-1,6-bisphosphatase 1 OS=Homo sapiens GN=FBP1 PE=1 SV=5	17.4556	4	4	4	338	36.819	6.99	108.5	75.7	102.9	106.7	89.3	116.9	95.7	104.3	0.542761
Q02413	DSG1	Desmoglein-1 OS=Homo sapiens GN=DSG1 PE=1 SV=2	1.52526	1	1	1	1049	113.676	5.03	104.6	90	92.5	99.9	98.9	114.1	95.7	104.3	0.26645
Q92743	HTRA1	Serine protease HTRA1 OS=Homo sapiens GN=HTRA1 PE=1 SV=1	2.29167	1	1	1	480	51.255	7.83	119.1	69.7	98.4	105.2	102.2	105.3	95.7333	104.233	0.585709
D3DUU2	CD163	CD163 antigen, isoform CRA_b OS=Homo sapiens GN=CD163 PE=4 SV=1	26.0954	18	41	1	1027	110.67	5.91	85.9	113	89	151	80	81	95.9667	104	0.764168
Q8NGE6		Olfactory receptor OS=Homo sapiens PE=3 SV=1	6.29921	1	1	1	254	28.132	7.91	102.3	82.5	103.2	84.5	118.6	109	96	104.033	0.546026
Q14520	HABP2	Hyaluronan-binding protein 2 OS=Homo sapiens GN=HABP2 PE=1 SV=1	35.3571	16	94	16	560	62.63	6.54	94.4	101.3	92.5	118.6	96.5	96.8	96.0667	103.967	0.367898
V9HW88	HEL-S-99n	Calreticulin, isoform CRA_b OS=Homo sapiens GN=HEL-S-99n PE=2 SV=1	14.3885	4	8	4	417	48.112	4.44	95.8	90.7	101.7	96.9	96.9	118	96.0667	103.933	0.365716
P0C0L4	C4A	Complement C4-A OS=Homo sapiens GN=C4A PE=1 SV=2	56.8807	90	1863	3	1744	192.664	7.08	78.8	73.2	136.4	68	101.6	142	96.1333	103.867	0.805648
Q99536	VAT1	Synaptic vesicle membrane protein VAT-1 homolog OS=Homo sapiens GN=VAT1 PE=1 SV=2	3.05344	1	1	1	393	41.893	6.29	101.4	82.7	104.4	106.3	112.4	92.8	96.1667	103.833	0.438677
B2R5M8		Isocitrate dehydrogenase [NADP] OS=Homo sapiens PE=2 SV=1	6.76329	3	3	3	414	46.619	7.01	99.3	82.6	106.7	98.2	105	108.3	96.2	103.833	0.378914
P28799	GRN	Granulins OS=Homo sapiens GN=GRN PE=1 SV=2	7.25126	3	3	3	593	63.5	6.83	99.5	82.4	106.9	103.4	87.4	120.4	96.2667	103.733	0.56675
A0A0B4J1U7	IGHV6-1	Protein IGHV6-1 (Fragment) OS=Homo sapiens GN=IGHV6-1 PE=1 SV=1	21.4876	3	5	3	121	13.473	9.2	98.5	106.5	84	91.8	148.9	70.3	96.3333	103.667	0.778381
P05362	ICAM1	Intercellular adhesion molecule 1 OS=Homo sapiens GN=ICAM1 PE=1 SV=2	30.0752	12	25	12	532	57.789	7.99	98.5	85.9	104.7	93.5	103.4	114.1	96.3667	103.667	0.419594
O60462	NRP2	Neuropilin-2 OS=Homo sapiens GN=NRP2 PE=1 SV=2	3.65199	3	3	3	931	104.792	5.17	110.4	81.4	97.3	100.1	110.1	100.7	96.3667	103.633	0.464156
V9HWA9	HEL-S-62p	Epididymis secretory sperm binding protein Li 62p OS=Homo sapiens GN=HEL-S-62p PE=2 SV=1	53.9988	76	294	76	1663	187.03	6.4	91.2	97	100.9	107	98.7	105.1	96.3667	103.6	0.127781
Q03591	CFHR1	Complement factor H-related protein 1 OS=Homo sapiens GN=CFHR1 PE=1 SV=2	51.8182	11	200	2	330	37.626	7.39	93.7	119.6	75.9	121.7	115.2	73.9	96.4	103.6	0.732249
Q6LAM1		Heavy chain of factor I (Fragment) OS=Homo sapiens PE=2 SV=1	49.8442	16	215	2	321	35.859	7.59	82.5	99.1	107.7	107.9	95.9	106.9	96.4333	103.567	0.440341
P04075	ALDOA	Fructose-bisphosphate aldolase A OS=Homo sapiens GN=ALDOA PE=1 SV=2	46.7033	14	38	13	364	39.395	8.09	93.4	86.6	109.4	94.6	92.1	123.9	96.4667	103.533	0.594735
P06312	IGKV4-1	Immunoglobulin kappa variable 4-1 OS=Homo sapiens GN=IGKV4-1 PE=1 SV=1	22.314	2	4	1	121	13.372	5.25	91.5	96.9	101.1	87.2	102.4	120.9	96.5	103.5	0.527653
Q0ZCH6		Immunglobulin heavy chain variable region (Fragment) OS=Homo sapiens PE=4 SV=1	23.6641	3	3	2	131	14.327	6.55	107.3	101.3	81	93.7	145.5	71.3	96.5333	103.5	0.780463
A0A140TA29	C4B	Complement C4-B OS=Homo sapiens GN=C4B PE=1 SV=1	59.2462	89	1861	2	1698	187.549	7.33	85.5	93.5	110.8	81.1	108.2	120.9	96.6	103.4	0.650551
J3KTC3	HPR	Haptoglobin-related protein OS=Homo sapiens GN=HPR PE=1 SV=1	38.4615	7	97	1	117	13.256	8.27	125.4	64.9	99.5	86.1	135.5	88.6	96.6	103.4	0.789067
B4E1B3		cDNA FLJ53950, highly similar to Angiotensinogen OS=Homo sapiens PE=2 SV=1	29.3991	11	126	1	466	51.03	6.16	112.2	65.9	112	116.1	100.8	92.9	96.7	103.267	0.716428
P14625	HSP90B1	Endoplasmin OS=Homo sapiens GN=HSP90B1 PE=1 SV=1	29.3898	20	36	20	803	92.411	4.84	99.6	85.2	105.5	94.2	105.7	109.7	96.7667	103.2	0.445572
B7Z1F8		cDNA FLJ53025, highly similar to Complement C4-B OS=Homo sapiens PE=2 SV=1	79.2593	21	476	2	270	30.425	7.99	84.6	94.6	111.4	76.2	127.4	105.8	96.8667	103.133	0.727665
B4DRF2		cDNA FLJ58124, highly similar to Complement factor I (EC 3.4.21.45) OS=Homo sapiens PE=2 SV=1	46.1929	23	278	9	591	66.651	7.52	103.2	89.9	97.5	94.5	101.6	113.3	96.8667	103.133	0.402536
B4DLV7		cDNA FLJ60299, highly similar to Rab GDP dissociation inhibitor beta OS=Homo sapiens PE=2 SV=1	19.1537	7	8	7	449	51.121	8.18	85	95.8	109.8	94	80.1	135.3	96.8667	103.133	0.746139
B3KNX0		cDNA FLJ30621 fis, clone CTONG2001681, highly similar to Complement C1s subcomponent (EC 3.4.21.42) OS=Homo sapiens PE=2 SV=1	48.9826	28	289	28	688	76.645	4.96	105.3	91.6	93.8	104.7	99	105.6	96.9	103.1	0.259585
Q562M3	ACT	Actin-like protein (Fragment) OS=Homo sapiens GN=ACT PE=4 SV=1	57.2816	3	15	1	103	11.529	6.68	79.6	108.6	102.6	113.1	90.3	105.9	96.9333	103.1	0.608374
P23526	AHCY	Adenosylhomocysteinase OS=Homo sapiens GN=AHCY PE=1 SV=4	3.24074	1	1	1	432	47.685	6.34	149	64.5	77.4	97.4	116.5	95.2	96.9667	103.033	0.834062
Q99969	RARRES2	Retinoic acid receptor responder protein 2 OS=Homo sapiens GN=RARRES2 PE=1 SV=1	14.7239	3	3	3	163	18.606	9.09	87.5	105.4	98.1	110.9	98.4	99.6	97	102.967	0.413634
P19320	VCAM1	Vascular cell adhesion protein 1 OS=Homo sapiens GN=VCAM1 PE=1 SV=1	35.5886	23	58	23	739	81.224	5.22	102.7	82.7	105.7	110	81.7	117.2	97.0333	102.967	0.672223
Q14314	FGL2	Fibroleukin OS=Homo sapiens GN=FGL2 PE=1 SV=1	2.73349	2	2	2	439	50.197	7.39	95	84.7	111.4	93.9	92.1	122.8	97.0333	102.933	0.66458
Q12805	EFEMP1	EGF-containing fibulin-like extracellular matrix protein 1 OS=Homo sapiens GN=EFEMP1 PE=1 SV=2	47.6673	17	54	17	493	54.604	5.07	98.9	91.3	101	101.6	113.8	93.4	97.0667	102.933	0.425482
P01709	IGLV2-8	Immunoglobulin lambda variable 2-8 OS=Homo sapiens GN=IGLV2-8 PE=1 SV=2	13.5593	2	5	1	118	12.374	5.91	104.4	109.9	76.9	127.1	102.3	79.4	97.0667	102.933	0.749419
B2R888		Monocyte differentiation antigen CD14 OS=Homo sapiens PE=2 SV=1	39.2	11	41	11	375	40.023	6.23	106.8	89.9	94.6	99.4	99.2	110.1	97.1	102.9	0.401868
P07357	C8A	Complement component C8 alpha chain OS=Homo sapiens GN=C8A PE=1 SV=2	50	22	213	22	584	65.121	6.47	89.3	103.1	99	103.1	99.2	106.2	97.1333	102.833	0.27992
Q86VB7	CD163	Scavenger receptor cysteine-rich type 1 protein M130 OS=Homo sapiens GN=CD163 PE=1 SV=2	24.654	19	44	2	1156	125.369	5.95	108.7	78	104.9	109.4	84.6	114.5	97.2	102.833	0.695072
B7Z747		cDNA FLJ51120, highly similar to Matrix metalloproteinase-9 (EC 3.4.24.35) OS=Homo sapiens PE=2 SV=1	19.8653	8	10	2	594	66.137	6.83	90	76.2	125.4	92.6	110.7	105.2	97.2	102.833	0.736292
A0A0A0MSD0	SVEP1	Sushi, von Willebrand factor type A, EGF and pentraxin domain-containing protein 1 OS=Homo sapiens GN=SVEP1 PE=1 SV=1	3.66536	9	11	9	3574	390.214	5.5	108.8	85.7	97.3	99.6	99.1	109.5	97.2667	102.733	0.505331
P58166	INHBE	Inhibin beta E chain OS=Homo sapiens GN=INHBE PE=1 SV=1	4.28571	1	2	1	350	38.537	9.25	98	97	96.9	95.4	112.4	100.4	97.3	102.733	0.343082
Q9BT22	ALG1	Chitobiosyldiphosphodolichol beta-mannosyltransferase OS=Homo sapiens GN=ALG1 PE=1 SV=2	1.50862	1	3	1	464	52.484	7.23	101.5	92.7	97.7	93.8	118.6	95.7	97.3	102.7	0.553801
W0UV60	RAF3	Ribonuclease A F3 OS=Homo sapiens GN=RAF3 PE=3 SV=1	19.8758	2	4	2	161	18.342	8.73	86.3	86.9	118.8	99.6	101.6	106.8	97.3333	102.667	0.651616
A8K061		cDNA FLJ77880, highly similar to Homo sapiens angiopoietin-like 3, mRNA OS=Homo sapiens PE=2 SV=1	12.1739	5	8	5	460	53.605	6.6	85.2	91.3	115.5	106.8	93.2	107.9	97.3333	102.633	0.636841
D6RFN0	COPS4	COP9 signalosome complex subunit 4 OS=Homo sapiens GN=COPS4 PE=1 SV=1	3.65297	1	1	1	438	49.653	5.81	101.6	98	92.4	96.5	66.9	144.5	97.3333	102.633	0.827356
Q92994	BRF1	Transcription factor IIIB 90 kDa subunit OS=Homo sapiens GN=BRF1 PE=1 SV=1	1.18168	1	2	1	677	73.794	5.43	87.7	86.9	117.5	104.1	102.8	101	97.3667	102.633	0.629898
B3VL05		Beta globin (Fragment) OS=Homo sapiens PE=3 SV=1	93.3333	11	152	1	105	11.478	6.68	81.4	107.4	103.5	108.7	77.5	121.5	97.4333	102.567	0.755185
H7BY55	CD55	Complement decay-accelerating factor OS=Homo sapiens GN=CD55 PE=1 SV=2	5.63636	2	2	2	550	58.873	8.78	102.7	87.8	102.5	82.6	95.8	128.7	97.6667	102.367	0.763137
B3KUE5	PLTP	Phospholipid transfer protein, isoform CRA_c OS=Homo sapiens GN=PLTP PE=2 SV=1	13.8402	6	9	6	513	56.598	6.64	104.7	84.7	103.6	106.5	92.2	108.3	97.6667	102.333	0.601883
A0A024RC42	CDH2	Cadherin 2, type 1, N-cadherin (Neuronal), isoform CRA_b OS=Homo sapiens GN=CDH2 PE=4 SV=1	5.84989	3	6	3	906	99.747	4.81	96.8	89.6	106.6	92.2	97.9	116.9	97.6667	102.333	0.629456
A0A0S2Z428	KRT6A	HCG2039812, isoform CRA_b (Fragment) OS=Homo sapiens GN=KRT6A PE=2 SV=1	34.5745	18	32	8	564	60.008	8	80.9	130	82.3	83.2	78.7	144.9	97.7333	102.267	0.873737
Q6NS36	FTH1	Ferritin (Fragment) OS=Homo sapiens GN=FTH1 PE=2 SV=1	11.2069	2	2	2	232	26.203	6.52	114.7	81.2	97.4	93.4	96.8	116.6	97.7667	102.267	0.728364
B7Z7F0		cDNA FLJ56420, highly similar to Aspartyl aminopeptidase (EC 3.4.11.21) OS=Homo sapiens PE=2 SV=1	2.83976	1	1	1	493	54.459	7.72	110.5	72.1	110.6	90.7	96.6	119.3	97.7333	102.2	0.787539
B4E1T1		cDNA FLJ54081, highly similar to Keratin, type II cytoskeletal 5 OS=Homo sapiens PE=2 SV=1	32.4324	18	31	1	555	58.814	5.97	90.9	110.1	92.3	69.9	111.5	125.3	97.7667	102.233	0.81382
P16233	PNLIP	Pancreatic triacylglycerol lipase OS=Homo sapiens GN=PNLIP PE=1 SV=1	4.73118	2	2	2	465	51.124	6.73	104.8	68.3	120.2	122	73.3	111.4	97.7667	102.233	0.844449
J3KNB4	CAMP	Cathelicidin antimicrobial peptide OS=Homo sapiens GN=CAMP PE=1 SV=1	12.1387	2	2	2	173	19.578	9.41	85.8	86.7	120.8	90.3	103.1	113.3	97.7667	102.233	0.753923
B4DQ50		cDNA FLJ56823, highly similar to Protein-glutamine gamma-glutamyltransferase E (EC 2.3.2.13) OS=Homo sapiens PE=2 SV=1	2.25141	1	1	1	533	58.757	7.15	104.9	71.1	117.4	90.6	83	133.1	97.8	102.233	0.841927
B4DPQ0	C1R	Complement C1r subcomponent OS=Homo sapiens GN=C1R PE=1 SV=1	52.8512	28	296	1	719	81.837	6.37	110.6	84.5	98.4	102.1	90.2	114.2	97.8333	102.167	0.693915
A8KAP9		cDNA FLJ78448, highly similar to Homo sapiens argininosuccinate synthetase (ASS), transcript variant 1, mRNA OS=Homo sapiens PE=2 SV=1	2.6699	1	1	1	412	46.525	8.03	108.7	61.9	122.9	108	103.5	95	97.8333	102.167	0.829178
P13671	C6	Complement component C6 OS=Homo sapiens GN=C6 PE=1 SV=3	58.03	45	404	5	934	104.718	6.76	93.2	105.8	94.6	111	102.2	93.2	97.8667	102.133	0.547639
A0A140VKF3		Testis tissue sperm-binding protein Li 70n OS=Homo sapiens PE=2 SV=1	42.5837	16	168	16	418	46.283	6.38	98.2	99.9	95.7	103.3	93.9	109	97.9333	102.067	0.416742
B4DQY7		cDNA FLJ51280, highly similar to TATA element modulatory factor (Fragment) OS=Homo sapiens PE=2 SV=1	1.41129	1	6	1	992	111.711	4.87	113.3	88.5	92.1	104.3	104.9	96.9	97.9667	102.033	0.644118
P05155	SERPING1	Plasma protease C1 inhibitor OS=Homo sapiens GN=SERPING1 PE=1 SV=2	35.2	19	384	19	500	55.119	6.55	89.2	103	101.8	99.8	101.2	104.9	98	101.967	0.443371
V9HWK2	HEL114	Epididymis luminal protein 114 OS=Homo sapiens GN=HEL114 PE=2 SV=1	27.6896	25	46	25	1134	123.722	5.66	96	91.9	106.2	100.7	94.2	111	98.0333	101.967	0.576644
A0A161I202	LTF	Lactoferrin OS=Homo sapiens GN=LTF PE=2 SV=1	35.865	18	29	1	711	78.288	8.18	92.7	77.1	124.3	130.1	76.9	98.9	98.0333	101.967	0.858951
P01031	C5	Complement C5 OS=Homo sapiens GN=C5 PE=1 SV=4	51.253	76	791	76	1676	188.186	6.52	95	101.2	97.9	108.4	97.6	99.8	98.0333	101.933	0.357116
Q59ET0		Glucan, branching enzyme 1 variant (Fragment) OS=Homo sapiens PE=2 SV=1	1.45889	1	1	1	754	86.059	6.93	99	84.6	110.6	113.7	83.7	108.5	98.0667	101.967	0.760047
P02743	APCS	Serum amyloid P-component OS=Homo sapiens GN=APCS PE=1 SV=2	33.1839	9	150	9	223	25.371	6.54	99.7	93.1	101.5	91.4	109.5	104.8	98.1	101.9	0.560521
P61626	LYZ	Lysozyme C OS=Homo sapiens GN=LYZ PE=1 SV=1	50.6757	6	25	6	148	16.526	9.16	92.9	96	105.4	100.3	101.9	103.5	98.1	101.9	0.381734
E1U340		ZNF511/PRAP1 fusion protein OS=Homo sapiens PE=2 SV=1	11.2903	2	2	2	310	35.164	5.94	88.3	99.9	106.2	95	107.5	103	98.1333	101.833	0.593656
P07358	C8B	Complement component C8 beta chain OS=Homo sapiens GN=C8B PE=1 SV=3	55.1607	29	282	29	591	67.003	8.13	92.3	100.5	101.7	99.9	102.2	103.5	98.1667	101.867	0.303389
P06733	ENO1	Alpha-enolase OS=Homo sapiens GN=ENO1 PE=1 SV=2	24.8848	7	14	7	434	47.139	7.39	81.9	91	121.9	94.3	95.7	115.2	98.2667	101.733	0.814785
Q9HCL0	PCDH18	Protocadherin-18 OS=Homo sapiens GN=PCDH18 PE=2 SV=3	0.881057	1	1	1	1135	126.071	5.15	97.1	87.1	110.7	96.1	109.5	99.5	98.3	101.7	0.690326
P20851	C4BPB	C4b-binding protein beta chain OS=Homo sapiens GN=C4BPB PE=1 SV=1	47.2222	9	87	9	252	28.338	5.14	81.7	101.4	111.9	104.2	97.2	103.7	98.3333	101.7	0.731127
Q5U000		Cathepsin Z OS=Homo sapiens PE=2 SV=1	9.24092	2	3	2	303	33.846	7.11	93.2	89.4	112.5	104.2	91	109.7	98.3667	101.633	0.736427
Q8IZD7		Anti-thyroglobulin heavy chain variable region (Fragment) OS=Homo sapiens PE=2 SV=1	6.92308	1	2	1	130	13.893	8.46	102.3	127.1	65.7	86.9	122.7	95.2	98.3667	101.6	0.884318
P00352	ALDH1A1	Retinal dehydrogenase 1 OS=Homo sapiens GN=ALDH1A1 PE=1 SV=2	17.1657	6	11	6	501	54.827	6.73	90.5	85.4	119.7	105.2	96.7	102.6	98.5333	101.5	0.800332
A8K7T4		cDNA FLJ75774, highly similar to Homo sapiens lectin, mannose-binding 2 (LMAN2), mRNA OS=Homo sapiens PE=2 SV=1	14.8876	5	6	5	356	40.217	6.95	100.8	87.2	107.7	100.4	93.7	110.3	98.5667	101.467	0.726071
Q9Y5Y7	LYVE1	Lymphatic vessel endothelial hyaluronic acid receptor 1 OS=Homo sapiens GN=LYVE1 PE=1 SV=2	18.0124	7	20	7	322	35.191	8.28	108.6	82.3	105.1	103.6	84.9	115.6	98.6667	101.367	0.83511
Q16519	PROS1	Protein S (Fragment) OS=Homo sapiens GN=PROS1 PE=4 SV=1	42.6154	24	149	1	650	72.416	5.73	93.9	96.7	105.5	103.2	97.9	102.8	98.7	101.3	0.540286
B2R769		cDNA, FLJ93308, highly similar to Homo sapiens leukocyte-derived arginine aminopeptidase (LRAP), mRNA OS=Homo sapiens PE=2 SV=1	5.52083	5	6	5	960	110.361	6.77	110.9	85	100.2	92	94	117.9	98.7	101.3	0.827986
P39060	COL18A1	Collagen alpha-1(XVIII) chain OS=Homo sapiens GN=COL18A1 PE=1 SV=5	2.67959	4	6	4	1754	178.077	6.01	97.2	104.4	94.5	97.6	107.5	98.8	98.7	101.3	0.577737
J3QSU6	TNC	Tenascin OS=Homo sapiens GN=TNC PE=1 SV=1	15.998	22	34	22	2019	220.712	4.93	105.9	82.2	108.1	105.5	90	108.3	98.7333	101.267	0.81352
B1B0D4	ADAMTSL2	ADAMTS-like protein 2 OS=Homo sapiens GN=ADAMTSL2 PE=1 SV=1	8.01887	5	5	5	1060	116.21	6.76	98.4	95.9	102.3	95.4	100.2	107.8	98.8667	101.133	0.606578
B7Z4R8		cDNA FLJ53364, highly similar to Proteoglycan-4 (Fragment) OS=Homo sapiens PE=2 SV=1	5.74443	3	7	1	853	89.499	8.91	72.2	122	102.6	120.7	80	102.5	98.9333	101.067	0.914535
P10721	KIT	Mast/stem cell growth factor receptor Kit OS=Homo sapiens GN=KIT PE=1 SV=1	4.5082	4	5	4	976	109.794	6.98	105.7	88.8	102.5	95.7	97.9	109.4	99	101	0.78022
A0A024R5Z7	ANXA2	Annexin OS=Homo sapiens GN=ANXA2 PE=3 SV=1	10.0295	2	2	2	339	38.58	7.75	114.8	77.6	104.7	93.5	76.9	132.5	99.0333	100.967	0.927177
A8K2T4		cDNA FLJ78207, highly similar to Human complement protein component C7 mRNA OS=Homo sapiens PE=2 SV=1	57.2954	42	524	5	843	93.346	6.51	118.3	90	88.8	119.6	87.6	95.7	99.0333	100.967	0.893894
P16035	TIMP2	Metalloproteinase inhibitor 2 OS=Homo sapiens GN=TIMP2 PE=1 SV=2	6.81818	1	1	1	220	24.383	7.49	90.1	93.7	113.3	118.4	90.9	93.6	99.0333	100.967	0.872881
P24387	CRHBP	Corticotropin-releasing factor-binding protein OS=Homo sapiens GN=CRHBP PE=1 SV=2	30.7453	7	11	7	322	36.121	6.52	97.8	96.4	103.1	99.7	97.6	105.4	99.1	100.9	0.592313
Q6U2E7	C4B	C4B1 (Fragment) OS=Homo sapiens GN=C4B PE=4 SV=1	80.3279	3	53	1	61	6.347	9.7	129.6	75.9	92.1	78	122.3	102.2	99.2	100.833	0.940085
A8K3K1		cDNA FLJ78096, highly similar to Homo sapiens actin, alpha, cardiac muscle (ACTC), mRNA OS=Homo sapiens PE=2 SV=1	35.809	11	39	1	377	42.02	5.39	77.6	104.5	115.5	91.9	95.8	114.7	99.2	100.8	0.909894
E7DVW4	FABP4	Epididymis secretory protein Li 104 OS=Homo sapiens GN=FABP4 PE=2 SV=1	9.09091	1	1	1	132	14.709	7.14	110.6	96.6	90.4	96.3	119.1	87	99.2	100.8	0.893806
P04746	AMY2A	Pancreatic alpha-amylase OS=Homo sapiens GN=AMY2A PE=1 SV=2	26.0274	9	15	9	511	57.67	7.05	116.1	79.7	101.8	122.7	86.9	92.7	99.2	100.767	0.923546
B2R6W1		cDNA, FLJ93143, highly similar to Homo sapiens complement component 7 (C7), mRNA OS=Homo sapiens PE=2 SV=1	55.9905	39	500	2	843	93.485	6.48	68.4	126.6	102.7	65.8	113	123.6	99.2333	100.8	0.952107
P15169	CPN1	Carboxypeptidase N catalytic chain OS=Homo sapiens GN=CPN1 PE=1 SV=1	42.5764	13	93	13	458	52.253	7.34	103.6	89.1	105	105.2	97.8	99.4	99.2333	100.8	0.792009
G3XAI2	LAMB1	Laminin subunit beta-1 OS=Homo sapiens GN=LAMB1 PE=1 SV=1	10.0552	12	15	12	1810	200.347	4.96	106.8	86	104.9	95.6	108.6	98.1	99.2333	100.767	0.852665
P13645	KRT10	Keratin, type I cytoskeletal 10 OS=Homo sapiens GN=KRT10 PE=1 SV=6	44.6918	27	125	24	584	58.792	5.21	100.3	93.1	104.4	89.6	88.9	123.8	99.2667	100.767	0.906419
P03973	SLPI	Antileukoproteinase OS=Homo sapiens GN=SLPI PE=1 SV=2	9.09091	1	1	1	132	14.316	8.75	86.5	96.3	115.1	114.1	79.8	108.2	99.3	100.7	0.922452
Q5T2D2	TREML2	Trem-like transcript 2 protein OS=Homo sapiens GN=TREML2 PE=1 SV=2	4.36137	1	1	1	321	35.104	9.63	107.6	97.5	93	92.3	104.1	105.5	99.3667	100.633	0.843459
P36980	CFHR2	Complement factor H-related protein 2 OS=Homo sapiens GN=CFHR2 PE=1 SV=1	54.0741	10	124	5	270	30.631	6.38	87.7	120.1	90.4	107.3	103.9	90.7	99.4	100.633	0.920091
A0A1C9J6R5		B cell receptor heavy chain variable region (Fragment) OS=Homo sapiens PE=4 SV=1	14.3939	1	7	1	132	14.63	8.02	112.1	97.6	88.5	90.8	118.4	92.5	99.4	100.567	0.92252
A0A024R8G3	PTGDS	Prostaglandin D2 synthase 21kDa (Brain), isoform CRA_a OS=Homo sapiens GN=PTGDS PE=2 SV=1	17.3684	2	12	2	190	21.015	7.8	94.2	98.8	105.4	117.3	87.6	96.7	99.4667	100.533	0.914826
A0A024R374	CTSB	Cathepsin B, isoform CRA_a OS=Homo sapiens GN=CTSB PE=3 SV=1	10.6195	3	3	3	339	37.797	6.3	103.4	87	108.1	102.3	95.4	103.7	99.5	100.467	0.895218
Q8NBS9	TXNDC5	Thioredoxin domain-containing protein 5 OS=Homo sapiens GN=TXNDC5 PE=1 SV=2	2.5463	1	1	1	432	47.599	5.97	101.5	92	105.2	93.3	96.9	111.1	99.5667	100.433	0.903417
P08833	IGFBP1	Insulin-like growth factor-binding protein 1 OS=Homo sapiens GN=IGFBP1 PE=1 SV=1	11.583	2	2	2	259	27.885	5.19	119.7	88.8	90.3	93.1	114	94.1	99.6	100.4	0.950644
A6NC48	BST1	ADP-ribosyl cyclase/cyclic ADP-ribose hydrolase 2 OS=Homo sapiens GN=BST1 PE=1 SV=1	19.5195	5	8	5	333	37.458	7.97	108.1	89.9	100.8	101.6	87.4	112.1	99.6	100.367	0.935483
Q7Z3B1	NEGR1	Neuronal growth regulator 1 OS=Homo sapiens GN=NEGR1 PE=1 SV=3	5.64972	1	1	1	354	38.694	6.21	100.4	96.3	102.2	104.1	101.9	95.1	99.6333	100.367	0.83115
B4E0X1		Beta-2-microglobulin OS=Homo sapiens PE=2 SV=1	36.8852	4	12	4	122	13.937	7.44	88.4	110.8	99.8	101	95.4	104.5	99.6667	100.3	0.932149
B4DTH2		cDNA FLJ61165, highly similar to Fibronectin OS=Homo sapiens PE=2 SV=1	71.5134	19	201	3	337	37.884	5.52	101.7	92.3	105.2	86.1	122.8	91.9	99.7333	100.267	0.966747
C9IZP8	C1S	Complement C1s subcomponent (Fragment) OS=Homo sapiens GN=C1S PE=1 SV=1	16.5049	1	4	1	103	11.801	4.2	73.4	106.8	119.3	133.9	72.9	93.6	99.8333	100.133	0.990022
A2J422		Anti-HER3 scFv (Fragment) OS=Homo sapiens PE=2 SV=1	8.19672	2	4	1	244	26.009	8.4	76.6	151.4	71.6	82.6	141.7	76.1	99.8667	100.133	0.993974
B2R5S1		cDNA, FLJ92595, highly similar to Homo sapiens angiotensinogen (serine (or cysteine) proteinaseinhibitor, clade A (alpha-1 antiproteinase, antitrypsin), member 8)(AGT), mRNA OS=Homo sapiens PE=2 SV=1	32.1649	12	131	1	485	53.179	6.2	88.8	125.2	85.8	91.1	124.8	84.4	99.9333	100.1	0.992975
A0A024R6D3	ENTPD5	Ectonucleoside triphosphate diphosphohydrolase 5, isoform CRA_d OS=Homo sapiens GN=ENTPD5 PE=3 SV=1	7.47664	2	2	2	428	47.487	6.33	96.4	85.8	117.6	93.3	98.5	108.4	99.9333	100.067	0.990333
M9MML6	FCGR3B	Low affinity immunoglobulin gamma Fc region receptor III-B OS=Homo sapiens GN=FCGR3B PE=1 SV=1	10.0372	3	9	1	269	29.865	6.92	49.4	122.7	127.7	49.7	90.3	160.2	99.9333	100.067	0.997562
Q8NBP7	PCSK9	Proprotein convertase subtilisin/kexin type 9 OS=Homo sapiens GN=PCSK9 PE=1 SV=3	34.2486	15	25	15	692	74.239	6.61	98.2	91.7	109.9	100.4	95.5	104.2	99.9333	100.033	0.987268
J3QQX2	ARHGDIA	Rho GDP-dissociation inhibitor 1 OS=Homo sapiens GN=ARHGDIA PE=1 SV=1	6.38298	1	1	1	235	25.815	7.44	82	105.3	112.6	87	97.4	115.6	99.9667	100	0.997992
P08887	IL6R	Interleukin-6 receptor subunit alpha OS=Homo sapiens GN=IL6R PE=1 SV=1	2.99145	1	1	1	468	51.515	8.22	104.5	89.7	105.7	92.4	114.3	93.3	99.9667	100	0.997163
Q59ED3		Intercellular adhesion molecule 2 variant (Fragment) OS=Homo sapiens PE=2 SV=1	7.26744	2	5	2	344	38.352	7.78	116.3	91.2	92.5	91.9	94.3	113.8	100	100	1
A0A087WVE2	FCN1	Ficolin-1 OS=Homo sapiens GN=FCN1 PE=1 SV=1	2.5	1	1	1	360	39.157	8.46	93.9	99.8	106.3	111.1	94.9	94	100	100	1
Q8IY21	DDX60	Probable ATP-dependent RNA helicase DDX60 OS=Homo sapiens GN=DDX60 PE=1 SV=3	0.759346	1	1	1	1712	197.727	7.59	108.5	73	118.5	89.6	115.9	94.5	100	100	1
P62979	RPS27A	Ubiquitin-40S ribosomal protein S27a OS=Homo sapiens GN=RPS27A PE=1 SV=2	21.7949	3	9	3	156	17.953	9.64	89	105	106.3	109.2	83.8	106.7	100.1	99.9	0.984713
O14786	NRP1	Neuropilin-1 OS=Homo sapiens GN=NRP1 PE=1 SV=3	22.4269	16	28	16	923	103.069	5.88	108.4	87.3	104.9	101.3	94	104.3	100.2	99.8667	0.965339
Q03167	TGFBR3	Transforming growth factor beta receptor type 3 OS=Homo sapiens GN=TGFBR3 PE=1 SV=3	0.822562	1	1	1	851	93.44	5.71	102.7	95	103	106.7	102.3	90.3	100.233	99.7667	0.937101
A5YAK2	APOC4	Apolipoprotein C-IV OS=Homo sapiens GN=APOC4 PE=2 SV=1	29.9213	6	22	4	127	14.57	9.13	93.4	102.4	104.9	99.5	112.5	87.3	100.233	99.7667	0.956662
Q8N1N4	KRT78	Keratin, type II cytoskeletal 78 OS=Homo sapiens GN=KRT78 PE=2 SV=2	9.23077	5	5	4	520	56.83	6.02	109.9	84.2	106.6	77	118.4	103.8	100.233	99.7333	0.97426
P17927	CR1	Complement receptor type 1 OS=Homo sapiens GN=CR1 PE=1 SV=3	2.15792	1	1	1	2039	223.517	6.95	109	64.7	127.1	117.1	105.1	77	100.267	99.7333	0.981834
B2RCC7		cDNA, FLJ95989, highly similar to Homo sapiens six transmembrane epithelial antigen of the prostate 2 (STEAP2), mRNA OS=Homo sapiens PE=2 SV=1	5.30612	1	6	1	490	55.87	9.07	111.1	96	93.8	76.5	110.4	112.3	100.3	99.7333	0.966908
P14543	NID1	Nidogen-1 OS=Homo sapiens GN=NID1 PE=1 SV=3	14.595	14	18	14	1247	136.291	5.29	108	87.1	105.8	96.9	101.2	100.9	100.3	99.6667	0.930004
P35916	FLT4	Vascular endothelial growth factor receptor 3 OS=Homo sapiens GN=FLT4 PE=1 SV=3	4.62216	4	7	4	1363	152.66	6.3	110.8	87.7	102.6	95.4	91.3	112.3	100.367	99.6667	0.943785
P11047	LAMC1	Laminin subunit gamma-1 OS=Homo sapiens GN=LAMC1 PE=1 SV=3	3.85333	4	7	4	1609	177.489	5.12	109.6	87.3	104.4	91.6	96.2	111.1	100.433	99.6333	0.933033
Q16706	MAN2A1	Alpha-mannosidase 2 OS=Homo sapiens GN=MAN2A1 PE=1 SV=2	14.7727	13	17	13	1144	131.057	7.58	103.1	99.8	98.3	95.5	109.3	93.9	100.4	99.5667	0.87789
A0A087X1N8	SERPINB6	Serpin B6 OS=Homo sapiens GN=SERPINB6 PE=1 SV=1	3.79747	1	1	1	395	44.793	5.68	94.4	90.4	116.5	93.7	88.9	116.1	100.433	99.5667	0.944353
B2RE75		cDNA, FLJ95000, highly similar to Homo sapiens c-mer proto-oncogene tyrosine kinase (MERTK), mRNA OS=Homo sapiens PE=2 SV=1	0.700701	1	1	1	999	110.109	5.8	97.8	97.8	105.8	88.5	77.6	132.5	100.467	99.5333	0.958829
A0A024R8Z0	SELL	L-selectin OS=Homo sapiens GN=SELL PE=3 SV=1	18.4416	7	26	7	385	43.589	7.15	105.4	88.7	107.4	100	78.9	119.5	100.5	99.4667	0.941082
M9MML0	FCGR3A	Fc of IgG low affinity IIIa receptor isoform 1 OS=Homo sapiens GN=FCGR3A PE=1 SV=1	7.93103	3	8	1	290	32.67	8.1	165.2	68.3	68.4	80.6	101.4	116.2	100.633	99.4	0.972717
P98160	HSPG2	Basement membrane-specific heparan sulfate proteoglycan core protein OS=Homo sapiens GN=HSPG2 PE=1 SV=4	9.15509	27	43	27	4391	468.532	6.51	105.5	90.7	105.8	96	98.4	103.7	100.667	99.3667	0.824093
B2RDI5		cDNA, FLJ96627, highly similar to Homo sapiens calpain 1, (mu/I) large subunit (CAPN1), mRNA OS=Homo sapiens PE=2 SV=1	10.9244	5	5	5	714	81.845	5.54	108.1	90	103.8	95.4	100.9	101.7	100.633	99.3333	0.833848
A0A140VJF4		Biliverdin reductase A OS=Homo sapiens PE=2 SV=1	2.7027	1	1	1	296	33.407	6.44	115	84.8	102.2	91.9	117.6	88.5	100.667	99.3333	0.921363
Q6U2L6	C4B	C4B (Fragment) OS=Homo sapiens GN=C4B PE=4 SV=1	37	5	55	1	100	10.246	6.52	90	96.4	115.8	80.6	108	109.3	100.733	99.3	0.911809
A0A075B6N7	IGHA2	Ig alpha-2 chain C region (Fragment) OS=Homo sapiens GN=IGHA2 PE=1 SV=1	57.0588	13	137	3	340	36.568	6.27	102.8	119.8	80	141.8	92.9	62.7	100.867	99.1333	0.9496
P09382	LGALS1	Galectin-1 OS=Homo sapiens GN=LGALS1 PE=1 SV=2	28.1481	3	3	3	135	14.706	5.5	105.6	91.4	105.6	102.8	95.4	99.2	100.867	99.1333	0.755316
Q86YT9	JAML	Junctional adhesion molecule-like OS=Homo sapiens GN=JAML PE=1 SV=1	3.04569	1	1	1	394	44.311	7.12	98.4	104	100.2	90.2	89.2	118	100.867	99.1333	0.865232
F4MHP3	UTY	Ubiquitously transcribed tetratricopeptide repeat protein Y-linked transcript variant 146 OS=Homo sapiens GN=UTY PE=2 SV=2	2.79146	1	1	1	609	68.078	7.18	94.5	92.1	116.3	100.4	102.7	94.1	100.967	99.0667	0.826392
P63261	ACTG1	Actin, cytoplasmic 2 OS=Homo sapiens GN=ACTG1 PE=1 SV=1	68.5333	18	76	1	375	41.766	5.48	101	91.1	110.8	99.2	94.8	103.2	100.967	99.0667	0.773943
Q9HCU0	CD248	Endosialin OS=Homo sapiens GN=CD248 PE=1 SV=1	4.88771	2	3	2	757	80.807	5.35	111.8	85.8	105.4	93.1	109	95	101	99.0333	0.842696
P24593	IGFBP5	Insulin-like growth factor-binding protein 5 OS=Homo sapiens GN=IGFBP5 PE=1 SV=1	18.3824	3	4	3	272	30.55	8.21	101.3	92.1	109.5	98.1	116.9	82	100.967	99	0.869919
P08861	CELA3B	Chymotrypsin-like elastase family member 3B OS=Homo sapiens GN=CELA3B PE=1 SV=3	4.81481	1	1	1	270	29.244	6.28	87.3	88.8	127.1	98.4	85.5	112.9	101.067	98.9333	0.895439
Q15430	F5	Coagulation factor V (Fragment) OS=Homo sapiens GN=F5 PE=2 SV=1	24.1525	4	16	1	236	26.129	5.48	101	88.2	114.1	122.7	84.6	89.5	101.1	98.9333	0.885403
P52209	PGD	6-phosphogluconate dehydrogenase, decarboxylating OS=Homo sapiens GN=PGD PE=1 SV=3	15.942	5	5	5	483	53.106	7.23	99.8	92.3	111.2	96.4	99.8	100.6	101.1	98.9333	0.720566
Q86Z14	KLB	Beta-klotho OS=Homo sapiens GN=KLB PE=1 SV=1	1.341	1	1	1	1044	119.732	9.22	120.5	88	94.7	91.7	109	96	101.067	98.9	0.855894
P06681	C2	Complement C2 OS=Homo sapiens GN=C2 PE=1 SV=2	53.1915	33	280	8	752	83.214	7.42	102.6	100.5	100.4	106.9	90.5	99.1	101.167	98.8333	0.651669
A2IPI6		HRV Fab 027-VL (Fragment) OS=Homo sapiens PE=2 SV=1	20.354	2	4	1	113	12.375	9.41	103.8	91.1	108.6	91.9	119.2	85.3	101.167	98.8	0.848497
C9JF17	APOD	Apolipoprotein D (Fragment) OS=Homo sapiens GN=APOD PE=1 SV=1	30.6977	7	37	7	215	24.142	5.6	89.6	97	117.1	101.2	87.8	107.3	101.233	98.7667	0.817901
P18065	IGFBP2	Insulin-like growth factor-binding protein 2 OS=Homo sapiens GN=IGFBP2 PE=1 SV=2	36	9	21	9	325	34.791	7.5	94.2	101	108.8	87.2	113.7	95.3	101.333	98.7333	0.784773
A0A080YV01	LYZG	Lysozyme G OS=Homo sapiens GN=LYZG PE=3 SV=1	5.6338	1	2	1	142	16.214	5	89.7	110	104.4	98.9	95.8	101.3	101.367	98.6667	0.688427
P35052	GPC1	Glypican-1 OS=Homo sapiens GN=GPC1 PE=1 SV=2	3.22581	1	1	1	558	61.641	7.3	92.4	80.7	130.9	88.3	101.9	105.7	101.333	98.6333	0.87463
P08779	KRT16	Keratin, type I cytoskeletal 16 OS=Homo sapiens GN=KRT16 PE=1 SV=4	27.2727	13	23	4	473	51.236	5.05	73.7	145.9	84.6	82.7	89.1	124.1	101.4	98.6333	0.920057
P12111	COL6A3	Collagen alpha-3(VI) chain OS=Homo sapiens GN=COL6A3 PE=1 SV=5	13.5977	34	51	34	3177	343.457	6.68	110.3	89.1	104.8	100.1	91.2	104.5	101.4	98.6	0.726455
A0A0G2JMH6	HLA-DRA	HLA class II histocompatibility antigen, DR alpha chain OS=Homo sapiens GN=HLA-DRA PE=1 SV=1	11.4173	2	2	2	254	28.603	5	109.7	82.9	111.6	100	98.3	97.4	101.4	98.5667	0.775762
A0A0A0MTS2	GPI	Glucose-6-phosphate isomerase (Fragment) OS=Homo sapiens GN=GPI PE=1 SV=1	16.9284	6	8	6	573	64.784	9.04	92.4	92.6	119.3	104.5	80.3	110.9	101.433	98.5667	0.835137
B4DJQ8		cDNA FLJ55694, highly similar to Dipeptidyl-peptidase 1 (EC 3.4.14.1) OS=Homo sapiens PE=2 SV=1	8.07175	3	3	3	446	50.119	6.99	98.1	104	102.3	89.2	104	102.3	101.467	98.5	0.584432
A8K139		cDNA FLJ76744, highly similar to Homo sapiens L1 cell adhesion molecule (L1CAM), transcript variant 1, mRNA OS=Homo sapiens PE=2 SV=1	0.875099	1	1	1	1257	139.945	6.24	124.7	81.9	97.9	94.7	107.5	93.3	101.5	98.5	0.832326
P13667	PDIA4	Protein disulfide-isomerase A4 OS=Homo sapiens GN=PDIA4 PE=1 SV=2	4.8062	2	3	2	645	72.887	5.07	112.2	83.6	108.7	90.8	100.5	104.2	101.5	98.5	0.775954
Q9Y509	VH3	VH3 protein (Fragment) OS=Homo sapiens GN=VH3 PE=2 SV=1	15.6463	2	2	1	147	15.759	8.38	114.1	102.9	87.6	92.2	118.6	84.6	101.533	98.4667	0.823113
Q53HT9		Complement component 1, r subcomponent variant (Fragment) OS=Homo sapiens PE=2 SV=1	53.7589	28	273	1	705	80.189	6.44	109.2	111	84.5	104.2	122.6	68.4	101.567	98.4	0.869357
A0A075B6J9	IGLV2-18	HCG1782423 (Fragment) OS=Homo sapiens GN=IGLV2-18 PE=1 SV=1	24.1667	2	2	2	120	12.697	5.91	115.5	93.4	95.8	104.3	107.1	83.8	101.567	98.4	0.770567
D9ZGG2	VTN	Vitronectin OS=Homo sapiens GN=VTN PE=4 SV=1	53.3473	19	291	19	478	54.271	5.8	107.5	97.8	99.6	95.9	93.8	105.5	101.633	98.4	0.527122
A0A096LPE2	SAA2-SAA4	Protein SAA2-SAA4 OS=Homo sapiens GN=SAA2-SAA4 PE=4 SV=1	38.9423	8	23	5	208	23.338	8.98	78.4	111.5	115	93.3	107.5	94.3	101.633	98.3667	0.807133
P40925	MDH1	Malate dehydrogenase, cytoplasmic OS=Homo sapiens GN=MDH1 PE=1 SV=4	16.1677	5	7	5	334	36.403	7.36	102.9	95.9	106.4	99.4	94.4	101.1	101.733	98.3	0.404104
A2NXP8		Heavy chain variable region (Fragment) OS=Homo sapiens PE=2 SV=1	33.3333	3	13	1	123	13.825	9.72	111.2	100.5	93.5	97.5	118.2	79.1	101.733	98.2667	0.793847
P08253	MMP2	72 kDa type IV collagenase OS=Homo sapiens GN=MMP2 PE=1 SV=2	24.0909	11	23	11	660	73.835	5.47	111.9	93.3	100.3	103	91.1	100.5	101.833	98.2	0.607185
A0A0G2JHM4	C2	Complement C2 (Fragment) OS=Homo sapiens GN=C2 PE=1 SV=1	67.5862	6	44	1	145	15.786	7.43	124.7	91.8	89	90.1	94.7	109.7	101.833	98.1667	0.790324
P49247	RPIA	Ribose-5-phosphate isomerase OS=Homo sapiens GN=RPIA PE=1 SV=3	6.10932	1	1	1	311	33.248	8.54	114.3	91.1	100.3	82.9	110.3	101.1	101.9	98.1	0.735796
F8WAL6	ABI2	Abl interactor 2 OS=Homo sapiens GN=ABI2 PE=1 SV=2	3.11891	1	1	1	513	55.648	6.02	173.7	62.6	69.5	87	114.6	92.7	101.933	98.1	0.922282
U3PXP0	HBA2	Alpha globin chain (Fragment) OS=Homo sapiens GN=HBA2 PE=3 SV=1	66.6667	3	61	1	51	5.699	7.52	93.8	101	110.9	102	113.9	78.3	101.9	98.0667	0.757197
B4DJ30		cDNA FLJ61290, highly similar to Neutral alpha-glucosidase AB OS=Homo sapiens PE=2 SV=1	5.62814	4	4	4	995	112.855	6.06	96.5	92	117.3	95.2	102.7	96.3	101.933	98.0667	0.659381
A0A024R231	GDA	Guanine deaminase, isoform CRA_b OS=Homo sapiens GN=GDA PE=4 SV=1	2.64317	1	1	1	454	50.971	5.68	136.8	72.4	96.6	95.2	101.5	97.5	101.933	98.0667	0.847654
B2R950		cDNA, FLJ94213, highly similar to Homo sapiens pregnancy-zone protein (PZP), mRNA OS=Homo sapiens PE=2 SV=1	23.6842	28	341	19	1482	163.768	6.38	114.3	84.1	107.5	108.1	100	86	101.967	98.0333	0.743051
O75326	SEMA7A	Semaphorin-7A OS=Homo sapiens GN=SEMA7A PE=1 SV=1	3.9039	1	1	1	666	74.776	7.64	111.9	92.3	101.8	95.1	94	104.9	102	98	0.579126
A0A0U4EXB4	HP	Haptoglobin (Fragment) OS=Homo sapiens GN=HP PE=4 SV=1	72.6496	10	202	1	117	13.401	6.52	75.4	80.1	150.7	125	92.9	75.9	102.067	97.9333	0.890909
Q08554	DSC1	Desmocollin-1 OS=Homo sapiens GN=DSC1 PE=1 SV=2	5.14541	3	3	3	894	99.924	5.43	113.6	85.8	106.8	106.9	93.2	93.6	102.067	97.9	0.683631
P22792	CPN2	Carboxypeptidase N subunit 2 OS=Homo sapiens GN=CPN2 PE=1 SV=3	30.4587	14	121	14	545	60.518	5.99	121.9	86.4	98	96.3	88.5	108.9	102.1	97.9	0.744449
Q6NS95	IGL@	IGL@ protein OS=Homo sapiens GN=IGL@ PE=2 SV=1	40.5983	8	114	1	234	25.132	6.67	88.2	127.8	90.5	95.5	112.7	85.4	102.167	97.8667	0.790048
P07359	GP1BA	Platelet glycoprotein Ib alpha chain OS=Homo sapiens GN=GP1BA PE=1 SV=2	13.3436	8	23	8	652	71.495	6.29	95.2	102.1	109.2	95.8	89.3	108.4	102.167	97.8333	0.564684
P08697	SERPINF2	Alpha-2-antiplasmin OS=Homo sapiens GN=SERPINF2 PE=1 SV=3	46.4358	19	210	19	491	54.531	6.29	99.2	102.2	105.5	108.1	78.5	106.6	102.3	97.7333	0.66537
A2TEM8	HLA-B	MHC class I antigen (Fragment) OS=Homo sapiens GN=HLA-B PE=4 SV=1	15.7303	1	1	1	89	10.564	8.18	106.4	93.8	106.7	93.8	94.6	104.8	102.3	97.7333	0.455508
J3KPA1	CRISP3	Cysteine-rich secretory protein 3 OS=Homo sapiens GN=CRISP3 PE=1 SV=1	22.1014	4	10	4	276	30.955	7.61	96.4	90	120.7	105.8	70	117.1	102.367	97.6333	0.794476
B2R7D2		cDNA, FLJ93389, highly similar to Homo sapiens multiple inositol polyphosphate histidine phosphatase, 1 (MINPP1), mRNA OS=Homo sapiens PE=2 SV=1	20.9446	8	16	8	487	55.085	7.97	104.4	102	100.7	109	85.5	98.3	102.367	97.6	0.526471
Q9H8L6	MMRN2	Multimerin-2 OS=Homo sapiens GN=MMRN2 PE=1 SV=2	6.21707	4	8	4	949	104.344	5.86	103.9	94	109.2	98.4	90.1	104.3	102.367	97.6	0.475966
O00187	MASP2	Mannan-binding lectin serine protease 2 OS=Homo sapiens GN=MASP2 PE=1 SV=4	25.8017	14	43	14	686	75.654	5.63	98.3	89.5	119.4	96.4	94.8	101.6	102.4	97.6	0.625983
Q6PIK1	IGL@	IGL@ protein OS=Homo sapiens GN=IGL@ PE=1 SV=1	40.4255	9	112	1	235	24.842	7.71	105.5	116.4	85.5	94.4	116.7	81.5	102.467	97.5333	0.736907
Q59E93		Membrane alanine aminopeptidase variant (Fragment) OS=Homo sapiens PE=2 SV=1	24.1556	22	41	9	977	110.523	5.53	99.3	95.1	113	98.2	94.2	100.2	102.467	97.5333	0.434473
G3V3D1	NPC2	Epididymal secretory protein E1 (Fragment) OS=Homo sapiens GN=NPC2 PE=1 SV=1	7.23982	1	2	1	221	23.684	6.73	106.4	82.5	118.6	93	96.2	103.4	102.5	97.5333	0.676075
Q9BUD6	SPON2	Spondin-2 OS=Homo sapiens GN=SPON2 PE=1 SV=3	6.0423	2	2	2	331	35.824	5.52	111.7	88.7	107.1	88.3	98	106.2	102.5	97.5	0.597302
P25311	AZGP1	Zinc-alpha-2-glycoprotein OS=Homo sapiens GN=AZGP1 PE=1 SV=2	63.7584	22	237	22	298	34.237	6.05	95.7	107	104.8	97.8	90.5	104.1	102.5	97.4667	0.390754
Q5U077	LDHB	L-lactate dehydrogenase OS=Homo sapiens GN=LDHB PE=2 SV=1	29.6407	9	24	8	334	36.615	6.05	126.3	82.1	99.2	100.3	87.9	104.2	102.533	97.4667	0.731632
Q8N4F0	BPIFB2	BPI fold-containing family B member 2 OS=Homo sapiens GN=BPIFB2 PE=1 SV=2	5.67686	2	2	2	458	49.142	8.72	86	142.2	79.4	92.7	111.6	88.1	102.533	97.4667	0.822712
Q13201	MMRN1	Multimerin-1 OS=Homo sapiens GN=MMRN1 PE=1 SV=3	6.67752	5	8	5	1228	138.023	7.93	89.1	85.9	132.7	99.2	94.3	98.8	102.567	97.4333	0.752188
Q02985	CFHR3	Complement factor H-related protein 3 OS=Homo sapiens GN=CFHR3 PE=1 SV=2	14.2424	5	123	2	330	37.299	7.55	111.5	90.8	105.5	96.7	100.7	94.9	102.6	97.4333	0.463687
P78451		Somatomammotropin (hormone) (Fragment) OS=Homo sapiens PE=2 SV=1	8.38323	1	1	1	167	19.573	5.03	110.6	82.9	114.3	86.7	110.1	95.3	102.6	97.3667	0.686128
Q96JD0		Amyloid lambda 6 light chain variable region SAR (Fragment) OS=Homo sapiens PE=2 SV=1	20.6897	2	10	1	116	12.287	5.01	108.2	115	84.7	95.3	102.5	94.3	102.633	97.3667	0.610136
P00742	F10	Coagulation factor X OS=Homo sapiens GN=F10 PE=1 SV=2	41.1885	18	75	18	488	54.697	5.94	99.2	97.7	111.1	97.4	89.3	105.3	102.667	97.3333	0.44285
A0A024RAR8	ARTS-1	Type 1 tumor necrosis factor receptor shedding aminopeptidase regulator, isoform CRA_a OS=Homo sapiens GN=ARTS-1 PE=4 SV=1	7.01382	5	8	5	941	107.136	6.34	112.3	99.1	96.6	104.5	98.7	88.8	102.667	97.3333	0.469847
Q15582	TGFBI	Transforming growth factor-beta-induced protein ig-h3 OS=Homo sapiens GN=TGFBI PE=1 SV=1	34.8463	18	52	18	683	74.634	7.71	98.2	106.7	103.2	95.8	93.8	102.3	102.7	97.3	0.2038
P16070	CD44	CD44 antigen OS=Homo sapiens GN=CD44 PE=1 SV=3	5.66038	5	14	5	742	81.487	5.33	95.3	99.9	113	95.5	94.3	102.1	102.733	97.3	0.404149
Q53Y51	DDT	D-dopachrome tautomerase OS=Homo sapiens GN=DDT PE=2 SV=1	20.339	2	3	2	118	12.704	7.3	107.3	90.3	110.6	83.7	104.6	103.5	102.733	97.2667	0.586529
Q99650	OSMR	Oncostatin-M-specific receptor subunit beta OS=Homo sapiens GN=OSMR PE=1 SV=1	3.67722	3	4	3	979	110.438	5.82	132.6	76.8	98.9	100.4	96.8	94.6	102.767	97.2667	0.752928
B4DI63		cDNA FLJ59205, highly similar to Mimecan OS=Homo sapiens PE=2 SV=1	4.77528	2	2	2	356	40.528	7.99	100.9	101.4	106	99.5	91.2	101	102.767	97.2333	0.184297
A0A087WV17	OSCAR	Osteoclast-associated immunoglobulin-like receptor OS=Homo sapiens GN=OSCAR PE=1 SV=1	5.24476	1	1	1	286	30.832	6.52	122.9	71.6	114	77	99.9	114.6	102.833	97.1667	0.783005
A2J1N6		Rheumatoid factor RF-ET9 (Fragment) OS=Homo sapiens PE=2 SV=1	29.5652	3	6	2	115	12.618	8.79	112.2	114.3	82.2	86.9	107.8	96.6	102.9	97.1	0.654073
P13688	CEACAM1	Carcinoembryonic antigen-related cell adhesion molecule 1 OS=Homo sapiens GN=CEACAM1 PE=1 SV=2	3.9924	1	1	1	526	57.525	5.97	132.6	75.8	100.4	91.7	102.6	96.9	102.933	97.0667	0.743732
A0A024QZI2	hCG_1998059	HCG1998059, isoform CRA_a OS=Homo sapiens GN=hCG_1998059 PE=4 SV=1	3.28767	1	1	1	365	39.718	6.54	106.6	98.9	103.2	89	111.6	90.5	102.9	97.0333	0.484773
A0A0A0MRJ7	F5	Coagulation factor V OS=Homo sapiens GN=F5 PE=1 SV=1	33.1539	69	232	66	2229	252.078	6.05	97.3	103.4	108.2	101.5	92.6	97.1	102.967	97.0667	0.220576
V9HWD8	HEL-S-163pA	Epididymis secretory sperm binding protein Li 163pA OS=Homo sapiens GN=HEL-S-163pA PE=2 SV=1	58.9899	17	437	10	495	54.22	5.86	112.1	97.4	99.4	99	91.4	100.7	102.967	97.0333	0.335035
P23471	PTPRZ1	Receptor-type tyrosine-protein phosphatase zeta OS=Homo sapiens GN=PTPRZ1 PE=1 SV=4	0.475162	1	1	1	2315	254.429	4.88	111.6	72.2	125.1	93	94.1	104	102.967	97.0333	0.733506
P11226	MBL2	Mannose-binding protein C OS=Homo sapiens GN=MBL2 PE=1 SV=2	48.3871	11	72	11	248	26.127	5.49	91.3	68.7	149	106.5	61	123.5	103	97	0.852809
P17900	GM2A	Ganglioside GM2 activator OS=Homo sapiens GN=GM2A PE=1 SV=4	5.18135	1	1	1	193	20.825	5.31	92.9	108.9	107.2	106	88.1	96.9	103	97	0.45396
A2NYQ9	HuVH8B	Anti-folate binding protein (Fragment) OS=Homo sapiens GN=HuVH8B VH PE=2 SV=1	31.6667	3	13	1	120	13.274	8.44	111.6	87.4	110	96.9	86.5	107.5	103	96.9667	0.574775
Q6MZX9	DKFZp686M08189	Putative uncharacterized protein DKFZp686M08189 OS=Homo sapiens GN=DKFZp686M08189 PE=2 SV=1	45.3416	14	115	1	483	52.202	5.29	102.1	148.3	58.7	89.8	150	51	103.033	96.9333	0.88243
Q96RD9	FCRL5	Fc receptor-like protein 5 OS=Homo sapiens GN=FCRL5 PE=1 SV=3	3.99181	3	4	3	977	106.371	7.14	110.5	84	114.8	102.9	103	84.9	103.1	96.9333	0.615933
B2R983		cDNA, FLJ94267, highly similar to Homo sapiens glutathione S-transferase omega 1 (GSTO1), mRNA OS=Homo sapiens PE=2 SV=1	22.8216	6	9	6	241	27.521	6.6	105.3	87.7	116.4	94.9	88.1	107.6	103.133	96.8667	0.569386
Q10471	GALNT2	Polypeptide N-acetylgalactosaminyltransferase 2 OS=Homo sapiens GN=GALNT2 PE=1 SV=1	7.53065	3	3	3	571	64.691	8.35	115.1	86.2	108.1	102.7	96	91.8	103.133	96.8333	0.533841
P00450	CP	Ceruloplasmin OS=Homo sapiens GN=CP PE=1 SV=1	69.3897	58	1676	5	1065	122.128	5.72	105.3	101.1	103.2	96.5	93.5	100.5	103.2	96.8333	0.0543778
A2NUT2		Lambda-chain (AA -20 to 215) OS=Homo sapiens PE=1 SV=1	40.4255	10	135	3	235	24.639	7.62	93.3	126.9	89.3	74	114.8	101.6	103.167	96.8	0.725972
A5PLM9	CTSL1	Cathepsin L1 OS=Homo sapiens GN=CTSL1 PE=2 SV=1	7.80781	2	2	2	333	37.509	5.45	105.6	92	111.9	97.2	92.6	100.6	103.167	96.8	0.370269
A8K168		Malic enzyme OS=Homo sapiens PE=2 SV=1	1.57343	1	1	1	572	64.095	6.13	139.6	62.9	107.1	78	78	134.3	103.2	96.7667	0.835804
Q86SQ4	ADGRG6	Adhesion G-protein coupled receptor G6 OS=Homo sapiens GN=ADGRG6 PE=1 SV=3	3.3579	3	5	3	1221	136.607	7.87	99.7	98.7	111.5	90.8	102	97.3	103.3	96.7	0.276162
A0A140VJR2		Testicular tissue protein Li 138 OS=Homo sapiens PE=2 SV=1	26.9777	11	25	11	493	54.513	6	118.2	84.5	107.3	98.5	88.8	102.6	103.333	96.6333	0.566496
Q59G70		Mannosyl (Alpha-1,3-)-glycoprotein beta-1,2-N-acetylglucosaminyltransferase variant (Fragment) OS=Homo sapiens PE=2 SV=1	4.43975	2	2	2	473	53.471	9.33	95.7	85.7	128.6	107.9	91.3	90.7	103.333	96.6333	0.660137
Q95HN1	HLA-CW	MHC class I antigen OS=Homo sapiens GN=HLA-CW PE=2 SV=1	10.3015	3	5	1	398	44.333	7.02	145.1	80.5	84.5	71.8	107.2	110.9	103.367	96.6333	0.795704
A8K6Q8		cDNA FLJ75881, highly similar to Homo sapiens transferrin receptor (p90, CD71) (TFRC), mRNA OS=Homo sapiens PE=2 SV=1	8.55263	5	7	5	760	84.82	6.61	119.5	91.3	99.4	97.2	97.5	95.2	103.4	96.6333	0.466337
Q99784	OLFM1	Noelin OS=Homo sapiens GN=OLFM1 PE=1 SV=4	15.4639	6	16	6	485	55.307	6.95	108.9	92	109.3	99.4	84.2	106.2	103.4	96.6	0.475678
A1L4H1	SSC5D	Soluble scavenger receptor cysteine-rich domain-containing protein SSC5D OS=Homo sapiens GN=SSC5D PE=1 SV=3	7.81945	8	11	8	1573	165.639	6.13	117.1	86.7	106.4	100.2	89.3	100.3	103.4	96.6	0.518746
G1FM90		Anti-Influenza A hemagglutinin heavy chain variable region (Fragment) OS=Homo sapiens PE=2 SV=1	37.2093	4	7	2	129	14.51	8.43	104.4	120	85.9	91.7	118.3	79.7	103.433	96.5667	0.672355
Q5SVJ8	KCNMA1	Calcium-activated potassium channel subunit alpha-1 OS=Homo sapiens GN=KCNMA1 PE=1 SV=2	2.79503	2	3	2	1288	143.458	7.08	146.9	82.5	80.9	79.1	116.9	93.6	103.433	96.5333	0.791101
Q9HBI1	PARVB	Beta-parvin OS=Homo sapiens GN=PARVB PE=1 SV=1	3.84615	1	1	1	364	41.688	6.73	77	105.5	127.9	90.7	80.6	118.3	103.467	96.5333	0.727464
P07333	CSF1R	Macrophage colony-stimulating factor 1 receptor OS=Homo sapiens GN=CSF1R PE=1 SV=2	8.23045	5	15	5	972	107.915	6.37	101.4	90.6	118.5	99.4	87.2	102.9	103.5	96.5	0.498415
P05556	ITGB1	Integrin beta-1 OS=Homo sapiens GN=ITGB1 PE=1 SV=2	4.63659	4	4	4	798	88.357	5.39	110	90.5	110.1	99	88.8	101.7	103.533	96.5	0.407625
P07737	PFN1	Profilin-1 OS=Homo sapiens GN=PFN1 PE=1 SV=2	59.2857	7	23	7	140	15.045	8.27	82.2	113.2	115.2	92.6	89.1	107.7	103.533	96.4667	0.590882
Q05CP7	FABP1	FABP1 protein (Fragment) OS=Homo sapiens GN=FABP1 PE=2 SV=1	24.6269	3	4	3	134	15.083	9.51	106.9	88.4	115.4	97.9	84.6	106.9	103.567	96.4667	0.527403
S6BGE0		IgG H chain OS=Homo sapiens PE=2 SV=1	15	4	14	1	300	32.161	7.85	112.4	124.5	73.9	96.8	107.5	85	103.6	96.4333	0.687869
A0A1B0RPQ4	FGFR1	Fibroblast growth factor receptor OS=Homo sapiens GN=FGFR1 PE=2 SV=1	4.62287	3	3	3	822	91.756	6.15	116.6	100.4	93.9	79.7	124.2	85.4	103.633	96.4333	0.666917
Q9NZP8	C1RL	Complement C1r subcomponent-like protein OS=Homo sapiens GN=C1RL PE=1 SV=2	28.3368	11	55	2	487	53.464	7.2	105	96.9	109	100.9	92.5	95.8	103.633	96.4	0.169148
A2VCK8	TMSB4X	Thymosin beta 4, X-linked OS=Homo sapiens GN=TMSB4X PE=2 SV=1	31.8182	2	4	2	44	5.05	5.06	66	122.2	122.8	98	70.3	120.7	103.667	96.3333	0.773494
P11717	IGF2R	Cation-independent mannose-6-phosphate receptor OS=Homo sapiens GN=IGF2R PE=1 SV=3	11.3609	24	30	24	2491	274.199	5.94	102.2	99	110	93.6	98.7	96.5	103.733	96.2667	0.105693
V9HWI6	HEL-S-51	Epididymis secretory protein Li 51 OS=Homo sapiens GN=HEL-S-51 PE=2 SV=1	78.27	41	953	31	474	52.929	5.54	109.5	105	96.9	101.2	85.8	101.7	103.8	96.2333	0.301874
O00391	QSOX1	Sulfhydryl oxidase 1 OS=Homo sapiens GN=QSOX1 PE=1 SV=3	38.6881	24	72	24	747	82.526	8.92	110.2	94.7	106.5	96.3	88	104.2	103.8	96.1667	0.312582
P08294	SOD3	Extracellular superoxide dismutase [Cu-Zn] OS=Homo sapiens GN=SOD3 PE=1 SV=2	33.75	5	10	5	240	25.835	6.61	111.4	98.6	101.5	96.7	94.7	97.1	103.833	96.1667	0.123917
P35590	TIE1	Tyrosine-protein kinase receptor Tie-1 OS=Homo sapiens GN=TIE1 PE=1 SV=1	4.92091	4	6	4	1138	125.01	7.03	109.7	87.7	114.1	94.3	91.8	102.3	103.833	96.1333	0.428968
A0A024RDE1	SPARCL1	SPARC-like 1 (Mast9, hevin), isoform CRA_a OS=Homo sapiens GN=SPARCL1 PE=4 SV=1	21.5361	11	22	11	664	75.161	4.81	115.5	90.8	105.6	93.7	87.8	106.6	103.967	96.0333	0.431272
P27169	PON1	Serum paraoxonase/arylesterase 1 OS=Homo sapiens GN=PON1 PE=1 SV=3	63.3803	13	98	11	355	39.706	5.22	115.5	100.6	95.9	106.5	78.6	102.9	104	96	0.491174
A0A024RC29	DSC3	Desmocollin 3, isoform CRA_b OS=Homo sapiens GN=DSC3 PE=4 SV=1	1.11607	1	1	1	896	99.892	6.1	136.8	82.8	92.5	86.9	79.9	121	104.033	95.9333	0.718267
A0A024RB01	ITGA5	Integrin, alpha 5 (Fibronectin receptor, alpha polypeptide), isoform CRA_b OS=Homo sapiens GN=ITGA5 PE=3 SV=1	1.27505	1	1	1	1098	119.164	6.06	115.7	85.9	110.6	98.2	91.9	97.7	104.067	95.9333	0.43667
A2MYE1		A30 (Fragment) OS=Homo sapiens PE=4 SV=1	46.875	3	13	2	96	10.386	8.5	90.9	97.1	124.3	86.6	107.6	93.5	104.1	95.9	0.531117
E5KT65		DNA-directed RNA polymerase subunit RPABC1 OS=Homo sapiens PE=3 SV=1	8.09524	1	2	1	210	24.536	5.95	95.2	100.8	116.3	107.5	98.3	81.8	104.1	95.8667	0.44878
A0A068LKQ8		Ig heavy chain variable region (Fragment) OS=Homo sapiens PE=2 SV=1	26.087	2	5	2	115	12.441	4.84	112.1	111.3	89	83.5	129.3	74.8	104.133	95.8667	0.678464
C0JYY2	APOB	Apolipoprotein B (Including Ag(X) antigen) OS=Homo sapiens GN=APOB PE=4 SV=1	63.0506	286	4904	128	4563	515.236	7.05	102.9	102.7	106.9	96.6	89.9	101.1	104.167	95.8667	0.0783898
P08519	LPA	Apolipoprotein(a) OS=Homo sapiens GN=LPA PE=1 SV=1	38.8742	32	104	32	4548	500.995	5.88	149.9	69.9	92.7	139.5	71.2	76.8	104.167	95.8333	0.809336
P40189	IL6ST	Interleukin-6 receptor subunit beta OS=Homo sapiens GN=IL6ST PE=1 SV=2	2.83224	3	4	3	918	103.471	5.95	95.6	106.1	110.8	91.2	92.2	104.1	104.167	95.8333	0.244434
Q59EB6		Complement component 1, q subcomponent, receptor 1 variant (Fragment) OS=Homo sapiens PE=2 SV=1	10.5812	5	7	5	671	70.414	5.44	102.8	100.5	109.3	100.1	82.3	105	104.2	95.8	0.318743
A0A146E5L3	Meflin	Mesenchymal stromal cell-and fibroblast-expressing Linx paralogue OS=Homo sapiens GN=Meflin PE=2 SV=1	15.4206	4	8	4	428	45.968	5.15	101.4	92.2	119.1	90.4	95.4	101.5	104.233	95.7667	0.376652
P01833	PIGR	Polymeric immunoglobulin receptor OS=Homo sapiens GN=PIGR PE=1 SV=4	16.7539	10	13	10	764	83.232	5.74	96	119.5	97.3	89.8	107.4	90	104.267	95.7333	0.424347
A0A125U0V1		MS-F1 heavy chain variable region (Fragment) OS=Homo sapiens PE=2 SV=1	23.8095	2	14	1	126	13.5	8.16	111.7	81.2	119.9	80.2	111.7	95.3	104.267	95.7333	0.596977
A2JA19		Anti-mucin1 light chain variable region (Fragment) OS=Homo sapiens PE=2 SV=1	38.3178	3	4	2	107	11.651	8.91	130.3	88.8	93.8	85.5	108.3	93.4	104.3	95.7333	0.591054
H9ZYJ2	TXN	Thioredoxin OS=Homo sapiens GN=TXN PE=2 SV=1	22.8571	2	3	2	105	11.73	4.92	91.3	88.7	132.9	90.4	97.1	99.6	104.3	95.7	0.587017
Q9Y279	VSIG4	V-set and immunoglobulin domain-containing protein 4 OS=Homo sapiens GN=VSIG4 PE=1 SV=1	9.02256	2	2	2	399	43.959	6.35	159.2	79	74.7	93.4	100.7	93	104.3	95.7	0.770848
E9PJD7	CYHR1	Cysteine and histidine-rich protein 1 OS=Homo sapiens GN=CYHR1 PE=1 SV=1	2.22772	1	1	1	404	43.785	6.76	110.5	125.9	76.6	83.8	98.3	104.9	104.333	95.6667	0.613361
Q6UW60	PCSK4	Proprotein convertase subtilisin/kexin type 4 OS=Homo sapiens GN=PCSK4 PE=1 SV=2	3.84106	1	2	1	755	82.742	8.31	101.3	121.7	90	74.1	129.8	83.1	104.333	95.6667	0.68118
P12110	COL6A2	Collagen alpha-2(VI) chain OS=Homo sapiens GN=COL6A2 PE=1 SV=4	2.84593	2	2	2	1019	108.512	6.21	118.3	92	102.9	91.6	92.8	102.5	104.4	95.6333	0.354199
Q2VIM7		S-(hydroxymethyl)glutathione dehydrogenase (Fragment) OS=Homo sapiens PE=3 SV=1	2.44565	1	1	1	368	38.976	7.99	93.9	102.1	117.2	105.5	91.4	89.9	104.4	95.6	0.356036
Q86YM0	CLIC2	Chloride intracellular channel 2 isoform b (Fragment) OS=Homo sapiens GN=CLIC2 PE=2 SV=1	6.32184	1	1	1	174	19.786	8.4	90.2	109.5	113.5	96.9	91.4	98.5	104.4	95.6	0.306196
Q3ZCW2	LGALSL	Galectin-related protein OS=Homo sapiens GN=LGALSL PE=1 SV=2	6.39535	1	1	1	172	18.974	5.35	99.2	113.8	100.3	87.6	79.2	119.9	104.433	95.5667	0.540437
A2JA16		Anti-mucin1 light chain variable region (Fragment) OS=Homo sapiens PE=2 SV=1	16.8224	1	1	1	107	11.614	8.46	102.7	122.4	88.3	103.5	107	76.2	104.467	95.5667	0.556099
A0A075B6R9	IGKV2D-24	Protein IGKV2D-24 (Fragment) OS=Homo sapiens GN=IGKV2D-24 PE=4 SV=1	10.8333	1	4	1	120	13.071	8.87	76.1	187.3	50	71	162.5	53	104.467	95.5	0.876286
Q96IY4	CPB2	Carboxypeptidase B2 OS=Homo sapiens GN=CPB2 PE=1 SV=2	36.8794	14	88	14	423	48.393	7.71	105.8	96.8	110.9	101.5	88.2	96.8	104.5	95.5	0.18766
F8W079	ATP5B	ATP synthase subunit beta, mitochondrial (Fragment) OS=Homo sapiens GN=ATP5B PE=1 SV=1	11.6197	1	1	1	284	30.151	8.29	124.7	92.2	96.6	89.5	97.1	99.9	104.5	95.5	0.445386
B7ZLI0	RTN4RL2	Reticulon 4 receptor-like 2 OS=Homo sapiens GN=RTN4RL2 PE=2 SV=1	8.33333	3	3	3	420	46.105	7.62	101.5	98.5	113.6	91	89.4	106	104.533	95.4667	0.265975
P02746	C1QB	Complement C1q subcomponent subunit B OS=Homo sapiens GN=C1QB PE=1 SV=3	35.9684	8	397	8	253	26.704	8.63	111.2	98.6	104	90.5	94.8	100.8	104.6	95.3667	0.121854
Q9P232	CNTN3	Contactin-3 OS=Homo sapiens GN=CNTN3 PE=1 SV=3	0.972763	1	1	1	1028	112.812	6.3	120.2	105.4	88.2	88.9	77.2	120	104.6	95.3667	0.589586
P21333	FLNA	Filamin-A OS=Homo sapiens GN=FLNA PE=1 SV=4	6.30903	10	10	10	2647	280.564	6.06	109.3	101.7	102.9	97.1	95.1	93.9	104.633	95.3667	0.021717
A0A024R728	MET	Met proto-oncogene (Hepatocyte growth factor receptor), isoform CRA_a OS=Homo sapiens GN=MET PE=3 SV=1	2.41477	3	3	3	1408	157.611	7.33	118.4	87.5	108	88.9	99	98.2	104.633	95.3667	0.390803
A0A0C4DFQ0	PDE4DIP	Myomegalin OS=Homo sapiens GN=PDE4DIP PE=1 SV=1	0.883392	1	1	1	1132	128.437	5.12	121.7	79.8	112.6	97	104.3	84.6	104.7	95.3	0.53771
P32942	ICAM3	Intercellular adhesion molecule 3 OS=Homo sapiens GN=ICAM3 PE=1 SV=2	11.1517	5	5	5	547	59.503	5.43	121	84.7	108.5	91.6	91.1	103.2	104.733	95.3	0.452885
A0A140VJM4	KCTD12	Potassium channel tetramerisation domain containing 12 OS=Homo sapiens GN=KCTD12 PE=2 SV=1	3.07692	1	1	1	325	35.679	5.64	106.9	86.9	120.4	85.5	100.9	99.4	104.733	95.2667	0.433979
Q4ZG40	MARCO	Macrophage receptor with collagenous structure OS=Homo sapiens GN=MARCO PE=2 SV=1	3.07692	1	3	1	520	52.625	8.78	126.6	86.1	101.7	90.5	88.9	106.2	104.8	95.2	0.501874
G3XAK1	MST1	Hepatocyte growth factor-like protein OS=Homo sapiens GN=MST1 PE=1 SV=1	51.8621	27	97	27	725	81.945	7.8	108.2	104.6	101.7	104.2	94.6	86.7	104.833	95.1667	0.1478
P26038	MSN	Moesin OS=Homo sapiens GN=MSN PE=1 SV=3	17.331	10	11	10	577	67.778	6.4	94.4	102	118.2	95.2	97.3	92.8	104.867	95.1	0.243036
J3QRN2	APOH	Beta-2-glycoprotein 1 (Fragment) OS=Homo sapiens GN=APOH PE=1 SV=1	76.7956	9	163	1	181	19.894	7.75	99.3	97.1	118.3	97.2	98.9	89.1	104.9	95.0667	0.253449
A0A0X9V9C4		GCT-A8 heavy chain variable region (Fragment) OS=Homo sapiens PE=2 SV=1	19.1667	2	11	1	120	13.219	8.41	97	86.3	131.4	98.5	102.9	83.8	104.9	95.0667	0.542252
Q9ULI3	HEG1	Protein HEG homolog 1 OS=Homo sapiens GN=HEG1 PE=1 SV=3	7.24113	6	9	6	1381	147.369	6.18	114	89.5	111.6	85.8	86.5	112.7	105.033	95	0.442955
Q14393	GAS6	Growth arrest-specific protein 6 OS=Homo sapiens GN=GAS6 PE=1 SV=2	1.66436	1	1	1	721	79.625	6.21	109.3	81.1	124.7	87.8	89.8	107.3	105.033	94.9667	0.517197
C0IMJ3		Periostin isoform thy6 OS=Homo sapiens PE=2 SV=1	26.6325	15	29	15	781	87.217	7.94	119.5	91.6	104	101.6	89.9	93.4	105.033	94.9667	0.315677
P35555	FBN1	Fibrillin-1 OS=Homo sapiens GN=FBN1 PE=1 SV=3	3.0303	7	8	7	2871	312.022	4.93	110.1	90.1	115	88.6	90.4	105.8	105.067	94.9333	0.340322
Q15485	FCN2	Ficolin-2 OS=Homo sapiens GN=FCN2 PE=1 SV=2	11.8211	2	3	2	313	33.98	6.77	128.8	85.9	100.6	88.4	105.6	90.8	105.1	94.9333	0.498881
Q8IXL6	FAM20C	Extracellular serine/threonine protein kinase FAM20C OS=Homo sapiens GN=FAM20C PE=1 SV=2	17.637	7	10	7	584	66.193	7.74	104	95.1	116.1	100.9	92.1	91.7	105.067	94.9	0.208439
A8K3U3		cDNA FLJ77863, highly similar to Homo sapiens secreted and transmembrane 1 (SECTM1), mRNA OS=Homo sapiens PE=2 SV=1	7.66129	1	1	1	248	26.995	7.43	102.4	106.4	106.5	102.8	87.7	94.2	105.1	94.9	0.0897449
P02747	C1QC	Complement C1q subcomponent subunit C OS=Homo sapiens GN=C1QC PE=1 SV=3	37.1429	7	128	7	245	25.757	8.41	112.5	101.3	101.6	93.3	83.6	107.8	105.133	94.9	0.266861
P30043	BLVRB	Flavin reductase (NADPH) OS=Homo sapiens GN=BLVRB PE=1 SV=3	57.767	8	16	8	206	22.105	7.65	108.2	94.9	112.2	100.2	92.1	92.3	105.1	94.8667	0.156233
B3KWB5		cDNA FLJ42722 fis, clone BRAMY4000277, highly similar to Alpha-1B-glycoprotein OS=Homo sapiens PE=2 SV=1	44.058	8	99	1	345	36.977	5.62	146.4	81.5	87.4	80.1	102.8	101.7	105.1	94.8667	0.665998
A0A140VK72		Testis secretory sperm-binding protein Li 199a OS=Homo sapiens PE=2 SV=1	3.39703	1	1	1	471	51.895	5.76	114.8	87.6	113	90.4	94.7	99.5	105.133	94.8667	0.325429
Q13740	ALCAM	CD166 antigen OS=Homo sapiens GN=ALCAM PE=1 SV=2	9.26244	5	8	5	583	65.061	6.25	116.7	88.3	110.7	96.7	86.8	100.8	105.233	94.7667	0.336388
P02745	C1QA	Complement C1q subcomponent subunit A OS=Homo sapiens GN=C1QA PE=1 SV=2	40.8163	8	35	8	245	26	9.11	108.7	101.1	106	89.2	89.6	105.4	105.267	94.7333	0.14247
A0A024R5F9	B3GNT6	UDP-GlcNAc:betaGal beta-1,3-N-acetylglucosaminyltransferase 6, isoform CRA_a OS=Homo sapiens GN=B3GNT6 PE=4 SV=1	6.26506	2	2	2	415	47.089	7.2	123.3	86.2	106.3	94.5	85.3	104.4	105.267	94.7333	0.431649
B4DLJ5		cDNA FLJ55716, highly similar to Desmocollin-2 OS=Homo sapiens PE=2 SV=1	10.9649	6	7	6	912	101.019	5.27	118.4	96.4	101.1	99.2	89.7	95.3	105.3	94.7333	0.21794
Q6UX71	PLXDC2	Plexin domain-containing protein 2 OS=Homo sapiens GN=PLXDC2 PE=1 SV=1	12.8544	5	8	5	529	59.546	6.46	103	97.9	115.1	96.7	94.5	92.8	105.333	94.6667	0.110703
E7EQ64	PRSS1	Trypsin-1 OS=Homo sapiens GN=PRSS1 PE=1 SV=1	17.2414	3	31	2	261	28.105	7.25	136	77.2	103	84	99.3	100.6	105.4	94.6333	0.578549
B1N7B6		Cryocrystalglobulin CC1 heavy chain variable region (Fragment) OS=Homo sapiens PE=2 SV=1	34.1667	3	6	3	120	13.184	8.48	97.1	148.3	70.8	86	116.5	81.4	105.4	94.6333	0.692093
A8K2T7		Receptor protein-tyrosine kinase OS=Homo sapiens PE=2 SV=1	2.39669	2	2	2	1210	134.104	6.7	116.8	86.8	112.7	87.4	87.9	108.4	105.433	94.5667	0.404281
A0A024R1G3	MB	Myoglobin OS=Homo sapiens GN=MB PE=3 SV=1	9.03614	1	2	1	166	18.501	7.55	113.5	96.8	106.2	104.7	89.1	89.7	105.5	94.5	0.192635
Q5T9B7	AK1	Adenylate kinase isoenzyme 1 OS=Homo sapiens GN=AK1 PE=1 SV=1	10.9524	2	4	2	210	23.396	8.6	112.3	87.6	116.7	92.7	94.7	96	105.533	94.4667	0.291112
O94985	CLSTN1	Calsyntenin-1 OS=Homo sapiens GN=CLSTN1 PE=1 SV=1	3.36391	2	3	2	981	109.724	4.91	98.8	89.2	128.6	92	79.8	111.6	105.533	94.4667	0.502915
O43157	PLXNB1	Plexin-B1 OS=Homo sapiens GN=PLXNB1 PE=1 SV=3	2.99766	3	3	3	2135	232.151	5.49	117.7	87.2	111.9	86.6	104.5	92.1	105.6	94.4	0.356125
P05543	SERPINA7	Thyroxine-binding globulin OS=Homo sapiens GN=SERPINA7 PE=1 SV=2	55.1807	21	181	21	415	46.295	6.3	104.8	102.5	109.6	91.8	84.3	106.9	105.633	94.3333	0.180148
P14618	PKM	Pyruvate kinase PKM OS=Homo sapiens GN=PKM PE=1 SV=4	38.9831	11	18	11	531	57.9	7.84	102.7	101.6	112.7	92.7	89.9	100.3	105.667	94.3	0.0730202
P30530	AXL	Tyrosine-protein kinase receptor UFO OS=Homo sapiens GN=AXL PE=1 SV=3	1.23043	1	1	1	894	98.273	5.43	98.1	112.8	106.1	81.1	110.3	91.5	105.667	94.3	0.299459
Q59EP2		Angiotensinogen variant (Fragment) OS=Homo sapiens PE=2 SV=1	31.7719	12	145	1	491	53.744	6.42	129	89.7	98.6	97.4	89.7	95.6	105.767	94.2333	0.395278
P23381	WARS	Tryptophan--tRNA ligase, cytoplasmic OS=Homo sapiens GN=WARS PE=1 SV=2	5.9448	2	2	2	471	53.132	6.23	124.8	71.2	121.3	90.4	88.7	103.6	105.767	94.2333	0.555336
A0A125QYY4		GCT-A7 heavy chain variable region (Fragment) OS=Homo sapiens PE=2 SV=1	47.0588	4	16	3	119	13.148	7.94	115.4	131.8	70.2	87.7	109.8	85.1	105.8	94.2	0.593308
Q0ZCI2		Immunglobulin heavy chain variable region (Fragment) OS=Homo sapiens PE=4 SV=1	18.0328	2	13	1	122	13.316	9.1	103.1	112.3	102.2	81	102.5	99	105.867	94.1667	0.189067
P78552	IL13RA1	Interleukin-13 receptor subunit alpha-1 OS=Homo sapiens GN=IL13RA1 PE=1 SV=1	3.0445	1	1	1	427	48.728	6.01	99.4	102.5	115.8	105.5	92.2	84.5	105.9	94.0667	0.210036
A0A0X9UWM4		IBM-A3 heavy chain variable region (Fragment) OS=Homo sapiens PE=2 SV=1	9.44882	1	5	1	127	14.36	8.37	86.2	140.6	91	88.9	107.6	85.7	105.933	94.0667	0.559816
Q6MZL2	DKFZp686M0562	Putative uncharacterized protein DKFZp686M0562 (Fragment) OS=Homo sapiens GN=DKFZp686M0562 PE=2 SV=1	29.9065	7	15	7	321	35.12	5.97	113.6	95.7	108.7	92.9	88.6	100.5	106	94	0.13287
B3KMQ6		cDNA FLJ12172 fis, clone MAMMA1000684, highly similar to Opioid growth factor receptor OS=Homo sapiens PE=2 SV=1	2.06795	1	1	1	677	73.324	4.84	90.2	114.9	112.9	86.9	111.4	83.7	106	94	0.366758
A0N5G1	V<kappa>1	Rheumatoid factor C6 light chain (Fragment) OS=Homo sapiens GN=V<kappa>1 PE=2 SV=1	15.5172	1	19	1	116	12.52	8.46	113.9	104	100.2	92.2	104.4	85.3	106.033	93.9667	0.156052
B2R701		cDNA, FLJ93202, Homo sapiens protease inhibitor 16 (PI16), mRNA OS=Homo sapiens PE=2 SV=1	13.3178	4	8	1	428	45.703	5.38	86.7	98.1	133.3	78.7	114.4	88.8	106.033	93.9667	0.530518
E5RIF9	CA1	Carbonic anhydrase 1 (Fragment) OS=Homo sapiens GN=CA1 PE=1 SV=1	77.027	10	115	1	148	16.308	6.25	104.2	98.4	115.5	109.5	70.3	102.1	106.033	93.9667	0.406848
H7C0L5	ITIH4	Inter-alpha-trypsin inhibitor heavy chain H4 (Fragment) OS=Homo sapiens GN=ITIH4 PE=1 SV=1	51.3213	30	402	2	719	80.014	5.45	105	86.6	126.6	110	81.6	90.2	106.067	93.9333	0.443781
B4E1D8		cDNA FLJ51597, highly similar to C4b-binding protein alpha chain OS=Homo sapiens PE=2 SV=1	73.3209	34	500	2	536	60.366	6.65	67.1	110.8	140.3	109.8	86	86	106.067	93.9333	0.621242
P24043	LAMA2	Laminin subunit alpha-2 OS=Homo sapiens GN=LAMA2 PE=1 SV=4	2.9148	6	7	6	3122	343.684	6.4	100.3	97.3	120.6	92.7	92.2	96.9	106.067	93.9333	0.179563
Q9BS26	ERP44	Endoplasmic reticulum resident protein 44 OS=Homo sapiens GN=ERP44 PE=1 SV=1	2.46305	1	1	1	406	46.941	5.26	106.9	97.7	113.6	100.9	93	87.9	106.067	93.9333	0.11155
D3DRP5	C9orf19	Chromosome 9 open reading frame 19, isoform CRA_a (Fragment) OS=Homo sapiens GN=C9orf19 PE=4 SV=1	4.8433	1	1	1	351	37.761	10.84	119.8	90	108.5	112.8	91.6	77.4	106.1	93.9333	0.417232
A0A024R962	hCG_40889	HCG40889, isoform CRA_b OS=Homo sapiens GN=hCG_40889 PE=4 SV=1	64.4192	72	1708	5	1231	138.979	6.62	107.9	105.3	105.1	97.9	91.5	92.3	106.1	93.9	0.00522368
A0A0S2Z4L3	PROS1	Protein S isoform 2 (Fragment) OS=Homo sapiens GN=PROS1 PE=2 SV=1	39.1243	24	155	1	708	78.803	5.74	105.8	103.5	109	97.9	89.3	94.5	106.1	93.9	0.0146913
A8K5T0		cDNA FLJ75416, highly similar to Homo sapiens complement factor H (CFH), mRNA OS=Homo sapiens PE=2 SV=1	62.5508	70	1716	1	1231	138.859	6.71	83.6	90.9	143.9	59.2	90.2	132.2	106.133	93.8667	0.688401
Q96QS0		Putative matrix cell adhesion molecule-3 OS=Homo sapiens PE=2 SV=1	6.91824	1	1	1	159	17.485	9.29	104.2	108.9	105.4	101.1	99	81.4	106.167	93.8333	0.126382
P04066	FUCA1	Tissue alpha-L-fucosidase OS=Homo sapiens GN=FUCA1 PE=1 SV=4	12.6609	5	8	5	466	53.655	6.84	95.2	102.6	120.8	87.2	82.3	112	106.2	93.8333	0.358527
A0A140VJC8		Testicular tissue protein Li 2 OS=Homo sapiens PE=2 SV=1	1.2987	1	1	1	770	86.888	4.82	105	100.7	112.9	76.7	115.5	89.3	106.2	93.8333	0.360019
D3YTG3	ABI3BP	Target of Nesh-SH3 OS=Homo sapiens GN=ABI3BP PE=1 SV=1	4.50197	6	11	6	1777	195.204	9.73	111.6	90.7	116.3	93.4	83.6	104.4	106.2	93.8	0.278582
A8K7Q1		cDNA FLJ77770, highly similar to Homo sapiens nucleobindin 1 (NUCB1), mRNA OS=Homo sapiens PE=2 SV=1	3.47072	1	1	1	461	53.85	5.25	113.3	85.8	119.6	88.9	97	95.4	106.233	93.7667	0.307488
Q8IUB2	WFDC3	WAP four-disulfide core domain protein 3 OS=Homo sapiens GN=WFDC3 PE=2 SV=1	3.8961	1	1	1	231	24.67	7.34	96.3	96	126.4	94.7	97.4	89.1	106.233	93.7333	0.294709
P03950	ANG	Angiogenin OS=Homo sapiens GN=ANG PE=1 SV=1	46.9388	6	17	6	147	16.539	9.64	104	103.1	111.9	106.4	87.5	87	106.333	93.6333	0.142534
Q9BTY2	FUCA2	Plasma alpha-L-fucosidase OS=Homo sapiens GN=FUCA2 PE=1 SV=2	8.99358	4	5	4	467	54.032	6.25	109.4	87.7	121.9	84.9	84.5	111.5	106.333	93.6333	0.397012
O75636	FCN3	Ficolin-3 OS=Homo sapiens GN=FCN3 PE=1 SV=2	44.1472	12	60	12	299	32.882	6.67	116.4	96.7	106	98.5	81.5	100.9	106.367	93.6333	0.201793
Q9HDC9	APMAP	Adipocyte plasma membrane-associated protein OS=Homo sapiens GN=APMAP PE=1 SV=2	7.69231	3	4	3	416	46.451	6.16	120.7	100.1	98.3	96.9	98.5	85.5	106.367	93.6333	0.198444
P18827	SDC1	Syndecan-1 OS=Homo sapiens GN=SDC1 PE=1 SV=3	5.48387	1	2	1	310	32.442	4.63	100.8	88	130.3	67	140.8	73.1	106.367	93.6333	0.659022
Q59GH3		Down syndrome cell adhesion molecule isoform CHD2-42 variant (Fragment) OS=Homo sapiens PE=2 SV=1	0.543747	1	1	1	2023	223.185	7.87	98.5	92.6	128	99.3	97.7	83.9	106.367	93.6333	0.34816
B2RBW9		cDNA, FLJ95746, highly similar to Homo sapiens inhibin, beta C (INHBC), mRNA OS=Homo sapiens PE=2 SV=1	11.6477	3	7	3	352	38.201	7.11	114.8	109.2	95.2	94.8	91.4	94.6	106.4	93.6	0.097123
A0A024RD26	GPR116	G protein-coupled receptor 116, isoform CRA_a OS=Homo sapiens GN=GPR116 PE=3 SV=1	5.57207	6	8	6	1346	149.331	6.65	113	94.8	111.5	94.9	87.6	98.2	106.433	93.5667	0.123877
J3KQ66	RELN	Reelin OS=Homo sapiens GN=RELN PE=1 SV=1	2.08092	5	6	5	3460	388.185	5.88	120.1	93.6	105.8	91.1	89.6	99.9	106.5	93.5333	0.193453
Q9NP29		Microfibrillar protein 2 (Fragment) OS=Homo sapiens PE=2 SV=1	11.5385	1	2	1	130	14.119	9.64	114.9	134.9	69.6	71.2	136.6	72.7	106.467	93.5	0.677345
A0A140VJT2		Testicular tissue protein Li 158 OS=Homo sapiens PE=2 SV=1	5.53506	1	1	1	271	29.798	5.74	121.8	89.8	107.9	91	92.1	97.3	106.5	93.4667	0.240577
B7Z992		cDNA FLJ53698, highly similar to Gelsolin OS=Homo sapiens PE=2 SV=1	57.0629	34	315	1	715	78.783	6.11	93.7	110.5	115.4	102.6	77.6	100.2	106.533	93.4667	0.274349
B2RAS2		cDNA, FLJ95079, highly similar to Homo sapiens cat eye syndrome chromosome region, candidate 1 (CECR1), mRNA OS=Homo sapiens PE=2 SV=1	6.84932	3	6	3	511	58.98	8.43	117.7	109.6	92.3	98.3	90.4	91.6	106.533	93.4333	0.171925
A5PL32	APOL1	APOL1 protein (Fragment) OS=Homo sapiens GN=APOL1 PE=2 SV=1	13.6674	6	8	6	439	48.486	7.17	124.5	100.5	94.7	89.3	91.7	99.3	106.567	93.4333	0.243384
A2N7P4	IGHM	Immunoglobulin mu-chain D-J4-region (Fragment) OS=Homo sapiens GN=IGHM PE=4 SV=1	21.6667	2	4	1	120	13.29	9.26	86.1	161.5	72.2	91.6	116.1	72.6	106.6	93.4333	0.687885
V9HW34	HEL-213	Epididymis luminal protein 213 OS=Homo sapiens GN=HEL-213 PE=2 SV=1	50.2128	10	257	1	235	25.63	6.55	101.6	137.1	81.1	93.9	123.6	62.7	106.6	93.4	0.611799
D9IAI1	PEBP1	Epididymis secretory protein Li 34 OS=Homo sapiens GN=PEBP1 PE=2 SV=1	25.1337	3	4	3	187	21.044	7.53	107.2	101	111.6	93.8	84.4	102	106.6	93.4	0.0904616
B4DYE5		cDNA FLJ51398, moderately similar to Homo sapiens LEM domain containing 1 (LEMD1), mRNA OS=Homo sapiens PE=2 SV=1	10.4972	1	1	1	181	20.184	8.5	146.5	86.6	86.8	94.3	82.9	102.9	106.633	93.3667	0.557513
A0A087WVC6	PTPRJ	Receptor-type tyrosine-protein phosphatase eta OS=Homo sapiens GN=PTPRJ PE=1 SV=1	8.19672	7	17	7	1342	146.467	5.62	111.6	91.2	117.3	98.2	84.5	97.2	106.7	93.3	0.213514
P08709	F7	Coagulation factor VII OS=Homo sapiens GN=F7 PE=1 SV=1	21.2446	7	19	7	466	51.56	7.23	116.5	97.1	106.8	93.9	103.2	82.5	106.8	93.2	0.172432
Q15392	DHCR24	Delta(24)-sterol reductase OS=Homo sapiens GN=DHCR24 PE=1 SV=2	3.29457	1	2	1	516	60.062	8.16	117	126.9	76.7	87.9	87.4	104.1	106.867	93.1333	0.446975
O43866	CD5L	CD5 antigen-like OS=Homo sapiens GN=CD5L PE=1 SV=1	56.4841	17	79	17	347	38.063	5.47	112.6	116.5	91.5	94.7	100.8	83.8	106.867	93.1	0.20973
D6RF20	GC	Vitamin D-binding protein (Fragment) OS=Homo sapiens GN=GC PE=1 SV=1	75.8621	11	235	1	145	16.073	5.83	115	88.2	117.6	96.2	96.6	86.4	106.933	93.0667	0.236691
Q13790	APOF	Apolipoprotein F OS=Homo sapiens GN=APOF PE=1 SV=2	12.2699	3	9	3	326	35.377	5.64	117.1	100.9	102.9	99.2	97.1	82.9	106.967	93.0667	0.126736
Q13508	ART3	Ecto-ADP-ribosyltransferase 3 OS=Homo sapiens GN=ART3 PE=1 SV=2	10.2828	3	5	3	389	43.895	6.06	102.9	99.9	118.1	90.7	94.2	94.1	106.967	93	0.0720559
P49773	HINT1	Histidine triad nucleotide-binding protein 1 OS=Homo sapiens GN=HINT1 PE=1 SV=2	15.873	1	1	1	126	13.793	6.95	112.3	93.6	115.2	84.5	107	87.6	107.033	93.0333	0.225013
P13727	PRG2	Bone marrow proteoglycan OS=Homo sapiens GN=PRG2 PE=1 SV=2	18.018	3	3	3	222	25.189	6.76	118.8	89.6	112.6	98.8	79.6	100.6	107	93	0.277157
A0A0G2JMY9	LILRA3	Leukocyte immunoglobulin-like receptor subfamily A member 3 OS=Homo sapiens GN=LILRA3 PE=1 SV=1	6.33947	2	2	2	489	52.901	8.09	141.7	73.2	106.1	89.4	80.3	109.3	107	93	0.551397
R4GMU1	H6PD	GDH/6PGL endoplasmic bifunctional protein OS=Homo sapiens GN=H6PD PE=1 SV=1	19.7007	12	14	12	802	90.116	7.23	95.4	124.8	101	88.8	102.6	87.5	107.067	92.9667	0.240033
V9HW22	HEL-S-72p	Epididymis luminal protein 33 OS=Homo sapiens GN=HEL-S-72p PE=2 SV=1	24.1486	11	16	9	646	70.854	5.52	106.4	92.7	122.2	85.8	99.1	93.8	107.1	92.9	0.203794
A0A024R4E5	HDLBP	High density lipoprotein binding protein (Vigilin), isoform CRA_a OS=Homo sapiens GN=HDLBP PE=1 SV=1	2.68139	1	1	1	1268	141.352	6.87	117	96	108.3	76.6	94.3	107.8	107.1	92.9	0.262445
B2R9F2		cDNA, FLJ94361, highly similar to Homo sapiens serine (or cysteine) proteinase inhibitor, clade A(alpha-1 antiproteinase, antitrypsin), member 6 (SERPINA6), mRNA OS=Homo sapiens PE=2 SV=1	31.6049	10	129	10	405	45.066	6.04	118.6	99.9	102.9	91.7	90.5	96.4	107.133	92.8667	0.0785321
V9HWB4	HEL-S-89n	Epididymis secretory sperm binding protein Li 89n OS=Homo sapiens GN=HEL-S-89n PE=2 SV=1	38.3792	21	33	20	654	72.288	5.16	103.2	98.2	120	95.8	91.4	91.4	107.133	92.8667	0.102237
O75594	PGLYRP1	Peptidoglycan recognition protein 1 OS=Homo sapiens GN=PGLYRP1 PE=1 SV=1	15.8163	2	3	2	196	21.717	8.59	84.5	98.7	138.2	100.6	78.9	99.1	107.133	92.8667	0.461231
P02749	APOH	Beta-2-glycoprotein 1 OS=Homo sapiens GN=APOH PE=1 SV=3	71.0145	21	425	13	345	38.273	7.97	98.9	119	103.6	105.3	86.7	86.6	107.167	92.8667	0.175152
B7Z5Q2		cDNA FLJ58075, highly similar to Ceruloplasmin (EC 1.16.3.1) OS=Homo sapiens PE=2 SV=1	66.2791	54	1297	1	946	108.753	5.77	112.1	89.9	119.4	93.4	89.3	95.8	107.133	92.8333	0.190063
L0R5C9	SMAP1	Alternative protein SMAP1 OS=Homo sapiens GN=SMAP1 PE=4 SV=1	57.5	1	1	1	40	4.404	9.42	103.5	94.8	123.2	86.9	106.9	84.7	107.167	92.8333	0.261585
Q8NF20	FLJ00382	FLJ00382 protein (Fragment) OS=Homo sapiens GN=FLJ00382 PE=2 SV=1	25.3112	8	22	8	482	52.892	8.66	97.7	117.3	106.7	88.2	99.5	90.6	107.233	92.7667	0.0943808
P30101	PDIA3	Protein disulfide-isomerase A3 OS=Homo sapiens GN=PDIA3 PE=1 SV=4	1.9802	1	1	1	505	56.747	6.35	91.3	108.3	122.1	92.1	96.6	89.5	107.233	92.7333	0.188036
Q9NQ38	SPINK5	Serine protease inhibitor Kazal-type 5 OS=Homo sapiens GN=SPINK5 PE=1 SV=2	1.2218	1	1	1	1064	120.637	8.06	126.3	79.5	115.9	78.8	99.5	99.9	107.233	92.7333	0.410869
A6XNE2		Complement factor D preproprotein OS=Homo sapiens PE=2 SV=1	52.6923	11	47	11	260	27.762	7.25	122.9	101.9	97	94.9	96.4	86.9	107.267	92.7333	0.161453
P23284	PPIB	Peptidyl-prolyl cis-trans isomerase B OS=Homo sapiens GN=PPIB PE=1 SV=2	17.1296	3	3	3	216	23.728	9.41	89.1	111	121.7	94.6	99.4	84.2	107.267	92.7333	0.241916
O60667	FCMR	Fas apoptotic inhibitory molecule 3 OS=Homo sapiens GN=FCMR PE=1 SV=1	4.87179	1	1	1	390	43.119	9.74	103.3	104.4	114.1	102.4	86.5	89.2	107.267	92.7	0.0719028
Q92859	NEO1	Neogenin OS=Homo sapiens GN=NEO1 PE=1 SV=2	11.5674	11	14	11	1461	159.917	6.54	119.3	92	110.6	88.4	100.6	89.1	107.3	92.7	0.178956
E9PR17	CD59	CD59 glycoprotein OS=Homo sapiens GN=CD59 PE=1 SV=1	24.6154	3	3	3	130	14.519	7.77	110.7	98.1	113.1	94.5	83.7	99.9	107.3	92.7	0.0933713
A0A024R825	CA3	Carbonic anhydrase III, muscle specific, isoform CRA_a OS=Homo sapiens GN=CA3 PE=4 SV=1	15.3846	3	3	3	260	29.553	7.34	98.4	95	128.5	92.5	87.6	98	107.3	92.7	0.257323
A0A0C4DH35	IGHV3-35	Protein IGHV3-35 (Fragment) OS=Homo sapiens GN=IGHV3-35 PE=1 SV=1	18.8034	2	3	2	117	12.802	7.88	103.7	122.7	95.5	100.7	96.7	80.7	107.3	92.7	0.222231
A0A140VK24		Testicular secretory protein Li 24 OS=Homo sapiens PE=2 SV=1	15	4	6	4	440	49.546	6.11	103	108.7	110.4	98.7	81.8	97.5	107.367	92.6667	0.0669587
P63104	YWHAZ	14-3-3 protein zeta/delta OS=Homo sapiens GN=YWHAZ PE=1 SV=1	52.2449	9	14	7	245	27.728	4.79	78.9	116.9	126.3	91.1	87.9	98.9	107.367	92.6333	0.377384
B4DPH5		cDNA FLJ55496, highly similar to Aminopeptidase N (EC 3.4.11.2) OS=Homo sapiens PE=2 SV=1	26.2664	14	26	1	533	61.376	5.33	111.2	70.6	140.3	82.9	85.1	109.9	107.367	92.6333	0.539507
Q9UMV1	C4B	Complement C4B1a (Fragment) OS=Homo sapiens GN=C4B PE=4 SV=1	23.913	1	2	1	46	5.048	4.72	123.1	87.7	111.4	71.6	97.1	109.1	107.4	92.6	0.385014
A2NYU7		Heavy chain Fab (Fragment) OS=Homo sapiens PE=2 SV=1	11.0236	1	1	1	127	13.983	9.25	101.5	110.4	110.5	92.5	91.5	93.7	107.467	92.5667	0.00813452
B3KX75		cDNA FLJ44930 fis, clone BRAMY3015549, highly similar to Neural cell adhesion molecule L1-like protein (Fragment) OS=Homo sapiens PE=2 SV=1	23.6298	18	32	18	1113	124.679	6.16	121.9	92.2	108.3	89.6	85.8	102.3	107.467	92.5667	0.207809
P28827	PTPRM	Receptor-type tyrosine-protein phosphatase mu OS=Homo sapiens GN=PTPRM PE=1 SV=2	4.6832	5	6	5	1452	163.578	6.65	121.6	97.4	103.3	92.8	90.3	94.5	107.433	92.5333	0.113866
Q8NCL6		cDNA FLJ90170 fis, clone MAMMA1000370, highly similar to Ig alpha-1 chain C region OS=Homo sapiens PE=2 SV=1	40.7708	15	208	1	493	53.19	6.52	104.8	124.5	93.2	98.4	107.7	71.4	107.5	92.5	0.350743
A0A109PS54		GCT-A8 light chain variable region (Fragment) OS=Homo sapiens PE=2 SV=1	33.0357	2	10	1	112	12.461	8.5	125.3	99.5	97.9	96.7	108.6	72.1	107.567	92.4667	0.339653
P54802	NAGLU	Alpha-N-acetylglucosaminidase OS=Homo sapiens GN=NAGLU PE=1 SV=2	12.2476	6	7	3	743	82.214	6.65	117.4	101.7	103.6	96.1	98.2	83.1	107.567	92.4667	0.0918468
Q6EMK4	VASN	Vasorin OS=Homo sapiens GN=VASN PE=1 SV=1	12.9272	7	16	7	673	71.668	7.39	106.9	104.7	111.1	94.5	82.3	100.5	107.567	92.4333	0.0559757
P01160	NPPA	Natriuretic peptides A OS=Homo sapiens GN=NPPA PE=1 SV=1	5.88235	1	1	1	153	16.697	7.15	79.8	106.3	136.7	111	91.3	74.9	107.6	92.4	0.478629
P03951	F11	Coagulation factor XI OS=Homo sapiens GN=F11 PE=1 SV=1	55.04	28	93	28	625	70.064	8.1	106.8	106	110	89.4	87.9	99.9	107.6	92.4	0.0186045
Q9UHG3	PCYOX1	Prenylcysteine oxidase 1 OS=Homo sapiens GN=PCYOX1 PE=1 SV=3	30.297	11	24	11	505	56.604	6.18	119.3	100	103.5	99.6	91.2	86.4	107.6	92.4	0.0983166
B7Z8B6		cDNA FLJ54395, highly similar to Inter-alpha-trypsin inhibitor heavy chain H1 OS=Homo sapiens PE=2 SV=1	35.313	15	248	5	623	69.483	6.16	117.1	104.9	100.9	110.2	84.1	82.9	107.633	92.4	0.207879
Q6UWP8	SBSN	Suprabasin OS=Homo sapiens GN=SBSN PE=1 SV=2	2.37288	1	1	1	590	60.505	7.01	145.4	74.3	103.1	71	116.7	89.4	107.6	92.3667	0.568492
O15031	PLXNB2	Plexin-B2 OS=Homo sapiens GN=PLXNB2 PE=1 SV=3	5.05985	7	7	5	1838	204.997	6.24	106.8	96.3	119.8	89.8	91.1	96.1	107.633	92.3333	0.0962078
Q59EA3		Cadherin 5, type 2 preproprotein variant (Fragment) OS=Homo sapiens PE=2 SV=1	19.4548	13	47	13	807	89.868	5.48	110	89.5	123.5	89.2	84.6	103.1	107.667	92.3	0.246898
P11279	LAMP1	Lysosome-associated membrane glycoprotein 1 OS=Homo sapiens GN=LAMP1 PE=1 SV=3	8.39329	4	6	4	417	44.854	8.75	97.6	100.5	124.9	87.4	101.6	87.9	107.667	92.3	0.192965
Q8IUL9	HBB	Hemoglobin beta chain variant Hb.Sinai-Bel Air (Fragment) OS=Homo sapiens GN=HBB PE=3 SV=1	93.3333	10	115	1	105	11.541	6.05	117.6	100.6	105	90.9	110.4	75.5	107.733	92.2667	0.243267
P01614	IGKV2D-40	Immunoglobulin kappa variable 2D-40 OS=Homo sapiens GN=IGKV2D-40 PE=1 SV=2	22.314	2	9	1	121	13.302	4.61	116.1	135.7	71.7	78	128.2	70.3	107.833	92.1667	0.582473
S6BAR0		IgG L chain OS=Homo sapiens PE=2 SV=1	37.037	8	114	2	216	23.107	7.69	117.5	129	77.1	99.9	111	65.5	107.867	92.1333	0.492738
A0A140VJT8		Testicular tissue protein Li 164 OS=Homo sapiens PE=2 SV=1	15.8351	5	6	5	461	49.941	4.82	112	89.1	122.5	95.1	94.8	86.5	107.867	92.1333	0.199781
P07900	HSP90AA1	Heat shock protein HSP 90-alpha OS=Homo sapiens GN=HSP90AA1 PE=1 SV=5	13.5246	8	8	8	732	84.607	5.02	104.7	89.3	129.6	88	96	92.4	107.867	92.1333	0.258899
A9UFC0	CASP14	Caspase 14 OS=Homo sapiens GN=CASP14 PE=2 SV=1	6.19835	1	1	1	242	27.649	5.34	141.6	70.7	111.3	78.5	67.1	130.8	107.867	92.1333	0.609073
A0A024RD39	PLA2G7	Phospholipase A2, group VII (Platelet-activating factor acetylhydrolase, plasma), isoform CRA_a OS=Homo sapiens GN=PLA2G7 PE=4 SV=1	23.356	7	12	7	441	50.017	7.56	127.9	86.4	109.3	96.9	85.4	94	107.867	92.1	0.275353
Q9UL82		Myosin-reactive immunoglobulin light chain variable region (Fragment) OS=Homo sapiens PE=2 SV=1	16.8224	2	3	2	107	11.438	6.6	121.6	126.5	75.6	91.5	117.6	67.2	107.9	92.1	0.508446
A0A125U0V4		GCT-A2 heavy chain variable region (Fragment) OS=Homo sapiens PE=2 SV=1	15.0794	1	3	1	126	13.773	5.45	116.3	116.8	90.6	95	105.7	75.6	107.9	92.1	0.269843
P02790	HPX	Hemopexin OS=Homo sapiens GN=HPX PE=1 SV=2	74.2424	32	1287	32	462	51.643	7.02	114.7	103.9	105.1	89.6	86.2	100.4	107.9	92.0667	0.0445386
E7EMB3	CALM2	Calmodulin OS=Homo sapiens GN=CALM2 PE=1 SV=1	28.0612	3	6	3	196	21.675	4.56	91.5	122.7	109.6	97.9	78.4	99.9	107.933	92.0667	0.2347
Q7Z7M0	MEGF8	Multiple epidermal growth factor-like domains protein 8 OS=Homo sapiens GN=MEGF8 PE=1 SV=2	2.95255	5	5	5	2845	302.901	6.87	112.4	94.1	117.3	92.1	83.3	100.8	107.933	92.0667	0.141602
Q2LD37	KIAA1109	Uncharacterized protein KIAA1109 OS=Homo sapiens GN=KIAA1109 PE=1 SV=2	0.2997	1	1	1	5005	555.133	6.58	120.2	134.9	68.7	113.6	88.9	73.6	107.933	92.0333	0.530914
Q6PIQ7	IGL@	IGL@ protein OS=Homo sapiens GN=IGL@ PE=1 SV=1	40.2542	9	131	1	236	25.005	7.97	122.9	116.8	84.3	99.5	112.7	63.8	108	92	0.444705
P10586	PTPRF	Receptor-type tyrosine-protein phosphatase F OS=Homo sapiens GN=PTPRF PE=1 SV=2	12.323	15	18	15	1907	212.744	6.3	114.3	98.2	111.5	89.6	93.3	93.1	108	92	0.0351364
A0A125U0U7		MS-C1 heavy chain variable region (Fragment) OS=Homo sapiens PE=2 SV=1	25.4237	2	5	1	118	13.088	6.07	106.8	114.2	103	68	112.2	95.8	108	92	0.295704
Q9UL89		Myosin-reactive immunoglobulin heavy chain variable region (Fragment) OS=Homo sapiens PE=2 SV=1	10.3448	1	4	1	116	12.597	9.1	82.8	169.1	72.1	66.9	138	71.1	108	92	0.698192
P00734	F2	Prothrombin OS=Homo sapiens GN=F2 PE=1 SV=2	57.2347	35	669	35	622	69.992	5.9	113	109.3	101.8	91.1	92.9	92	108.033	92	0.00860338
Q9Y4L1	HYOU1	Hypoxia up-regulated protein 1 OS=Homo sapiens GN=HYOU1 PE=1 SV=1	5.70571	5	8	5	999	111.266	5.22	113.4	97.8	112.8	91.4	89	95.5	108	91.9667	0.0421811
P60174	TPI1	Triosephosphate isomerase OS=Homo sapiens GN=TPI1 PE=1 SV=3	27.972	5	6	5	286	30.772	5.92	106.9	99.3	117.9	88.5	92.8	94.6	108.033	91.9667	0.0477547
Q0ZCJ2		Immunglobulin heavy chain variable region (Fragment) OS=Homo sapiens PE=4 SV=1	45.9677	5	15	3	124	13.642	7.93	103.5	131.7	88.9	98.8	99.8	77.1	108.033	91.9	0.330618
P07996	THBS1	Thrombospondin-1 OS=Homo sapiens GN=THBS1 PE=1 SV=2	33.5897	30	70	1	1170	129.3	4.94	103.4	113.5	107.4	84.7	107.8	83.3	108.1	91.9333	0.128907
Q9BS40	LXN	Latexin OS=Homo sapiens GN=LXN PE=1 SV=2	4.05405	1	1	1	222	25.734	5.78	110.1	102.5	111.8	71.4	83	121.3	108.133	91.9	0.349769
P10909	CLU	Clusterin OS=Homo sapiens GN=CLU PE=1 SV=1	40.7572	19	303	19	449	52.461	6.27	104.5	108.5	111.5	93	89.4	93.1	108.167	91.8333	0.00230485
X5D7A8	CADM1	Cell adhesion molecule 1 isoform A (Fragment) OS=Homo sapiens GN=CADM1 PE=2 SV=1	13.5881	3	6	3	471	51.501	4.87	113.8	90.3	120.4	85.6	92.3	97.5	108.167	91.8	0.168936
B2R8Y9		cDNA, FLJ94125, highly similar to Homo sapiens tissue factor pathway inhibitor(lipoprotein-associated coagulation inhibitor) (TFPI), mRNA OS=Homo sapiens PE=2 SV=1	5.92105	1	1	1	304	34.98	8.25	93.7	100.3	130.6	99.1	90.1	86.2	108.2	91.8	0.243044
D6RE86	CP	Ceruloplasmin (Fragment) OS=Homo sapiens GN=CP PE=1 SV=8	58.9888	9	102	2	178	20.749	7.24	94.2	115	115.5	90.9	90.5	93.9	108.233	91.7667	0.0811945
P07954	FH	Fumarate hydratase, mitochondrial OS=Homo sapiens GN=FH PE=1 SV=3	3.52941	1	1	1	510	54.602	8.76	95.4	60.4	168.9	90.3	83.3	101.6	108.233	91.7333	0.637511
B2R577		Protein S100 OS=Homo sapiens PE=2 SV=1	25.5556	3	4	3	90	10.101	5.91	94	104.4	126.4	94.2	79.8	101.2	108.267	91.7333	0.221955
O75083	WDR1	WD repeat-containing protein 1 OS=Homo sapiens GN=WDR1 PE=1 SV=4	11.7162	4	5	4	606	66.152	6.65	101.8	108.6	114.7	96.8	82.4	95.7	108.367	91.6333	0.0479945
A2NB44	IGH@	Cold agglutinin FS-2 H-chain (Fragment) OS=Homo sapiens GN=IGH@ PE=2 SV=1	21.9298	2	7	1	114	12.753	7.11	91.9	128	105.2	93.8	104.8	76.3	108.367	91.6333	0.280317
P48740	MASP1	Mannan-binding lectin serine protease 1 OS=Homo sapiens GN=MASP1 PE=1 SV=3	43.6338	25	64	25	699	79.195	5.49	102.7	106.6	115.9	98.7	88.1	88	108.4	91.6	0.0335773
A0A024R2W4	DAG1	Dystroglycan 1 (Dystrophin-associated glycoprotein 1), isoform CRA_a OS=Homo sapiens GN=DAG1 PE=4 SV=1	9.27374	5	10	5	895	97.48	8.56	105.6	103.1	116.6	92	88.2	94.5	108.433	91.5667	0.0204604
O14618	CCS	Copper chaperone for superoxide dismutase OS=Homo sapiens GN=CCS PE=1 SV=1	4.74453	1	1	1	274	29.022	5.58	118.8	91.4	115.2	90.3	100.2	84.2	108.467	91.5667	0.159024
A0A140GPP7		Prolyl endopeptidase FAP OS=Homo sapiens PE=3 SV=1	9.73684	7	22	6	760	87.701	6.55	128.3	88.7	108.4	90.9	93.5	90.2	108.467	91.5333	0.214086
A2NZ55		Variable immnoglobulin anti-estradiol heavy chain (Fragment) OS=Homo sapiens PE=2 SV=1	31.2977	3	19	1	131	13.913	8.79	123.2	118.1	84.1	88.1	108.4	78	108.467	91.5	0.326358
Q9UNN8	PROCR	Endothelial protein C receptor OS=Homo sapiens GN=PROCR PE=1 SV=1	9.2437	2	7	2	238	26.655	7.18	111.5	103.9	110	84.9	80.6	109	108.467	91.5	0.136923
Q8TER0	SNED1	Sushi, nidogen and EGF-like domain-containing protein 1 OS=Homo sapiens GN=SNED1 PE=2 SV=2	2.33546	2	2	2	1413	152.104	6.98	123.1	93.5	109	84.5	94.9	95.1	108.533	91.5	0.138945
Q8WZ75	ROBO4	Roundabout homolog 4 OS=Homo sapiens GN=ROBO4 PE=1 SV=1	7.34856	5	5	5	1007	107.39	6.64	123.8	94.1	107.7	88.4	85.5	100.5	108.533	91.4667	0.154472
B4DW52		cDNA FLJ55253, highly similar to Actin, cytoplasmic 1 OS=Homo sapiens PE=2 SV=1	72.6225	17	74	2	347	38.608	5.35	96.9	116.4	112.4	99	78.1	97.3	108.567	91.4667	0.128949
A8K486		Peptidyl-prolyl cis-trans isomerase OS=Homo sapiens PE=2 SV=1	58.1818	9	30	9	165	18.002	6.9	106.2	105.4	114.1	92.7	82.6	99	108.567	91.4333	0.036178
A2NB45		Cold agglutinin FS-1 L-chain (Fragment) OS=Homo sapiens PE=2 SV=1	32.7434	2	15	1	113	12.38	8.48	91.6	154.8	79.4	88.7	125	60.6	108.6	91.4333	0.596516
B4DZM1		cDNA FLJ58310, highly similar to Homo sapiens trinucleotide repeat containing 15 (TNRC15), mRNA OS=Homo sapiens PE=2 SV=1	1.72018	1	2	1	872	100.549	5.02	97.6	109.6	118.6	89	87	98.2	108.6	91.4	0.0697048
P55285	CDH6	Cadherin-6 OS=Homo sapiens GN=CDH6 PE=1 SV=1	3.41772	2	2	2	790	88.254	4.93	140.6	82	103.2	88.1	90.3	95.7	108.6	91.3667	0.375028
P04406	GAPDH	Glyceraldehyde-3-phosphate dehydrogenase OS=Homo sapiens GN=GAPDH PE=1 SV=3	38.806	9	23	9	335	36.03	8.46	100.3	105.9	119.8	93.6	82.8	97.6	108.667	91.3333	0.0761711
A0A140TA33	TNXB	Tenascin-X OS=Homo sapiens GN=TNXB PE=1 SV=1	14.3564	28	59	28	4242	457.989	5.17	132	88.7	105.3	95.1	85.3	93.5	108.667	91.3	0.251682
P27487	DPP4	Dipeptidyl peptidase 4 OS=Homo sapiens GN=DPP4 PE=1 SV=2	18.5379	14	23	14	766	88.222	6.04	110.2	97.4	118.5	86.4	90.6	96.8	108.7	91.2667	0.0633945
A6XGL1		Transthyretin OS=Homo sapiens PE=2 SV=1	32.0652	4	7	4	184	20.186	5.24	119.9	111.3	95	95.6	92	86.2	108.733	91.2667	0.0886389
J3KPF3	SLC3A2	4F2 cell-surface antigen heavy chain OS=Homo sapiens GN=SLC3A2 PE=1 SV=1	16.9572	9	12	9	631	68.059	5.05	122.1	94.4	109.7	92.6	83.9	97.3	108.733	91.2667	0.12184
Q07954	LRP1	Prolow-density lipoprotein receptor-related protein 1 OS=Homo sapiens GN=LRP1 PE=1 SV=2	8.20863	26	34	26	4544	504.276	5.39	116.3	95.5	114.5	90	87.3	96.4	108.767	91.2333	0.0710571
B4DID6		cDNA FLJ52545, highly similar to Dickkopf-related protein 3 OS=Homo sapiens PE=2 SV=1	4.94505	2	3	2	364	39.825	4.67	121.6	99	105.7	87.9	87.4	98.4	108.767	91.2333	0.0823296
A0A024R6W0	GOT2	Aspartate aminotransferase OS=Homo sapiens GN=GOT2 PE=4 SV=1	3.48837	1	1	1	430	47.445	9.01	131.7	77.5	117.1	86	96.7	90.9	108.767	91.2	0.346625
Q567P1	IGL@	IGL@ protein OS=Homo sapiens GN=IGL@ PE=2 SV=1	40.4255	8	127	2	235	24.784	7.3	111.4	142	72.9	88.6	113	72	108.767	91.2	0.492285
O15394	NCAM2	Neural cell adhesion molecule 2 OS=Homo sapiens GN=NCAM2 PE=1 SV=2	9.55795	6	7	6	837	92.988	5.6	120.9	95.8	109.7	88.6	89.5	95.5	108.8	91.2	0.0808546
J3KNP4	SEMA4B	Semaphorin-4B OS=Homo sapiens GN=SEMA4B PE=1 SV=1	4.89845	2	3	2	837	92.707	7.05	123.7	95.4	107.4	82.5	96.8	94.3	108.833	91.2	0.131176
Q6UVK1	CSPG4	Chondroitin sulfate proteoglycan 4 OS=Homo sapiens GN=CSPG4 PE=1 SV=2	3.27304	4	5	4	2322	250.382	5.47	117.3	99	110.1	86.6	87.2	99.7	108.8	91.1667	0.0610635
P13473	LAMP2	Lysosome-associated membrane glycoprotein 2 OS=Homo sapiens GN=LAMP2 PE=1 SV=2	10.9756	5	9	5	410	44.932	5.63	110.1	108.7	107.7	84.1	88.4	100.9	108.833	91.1333	0.0253562
A8K2T6		cDNA FLJ76013, highly similar to Homo sapiens EPH receptor A1 (EPHA1), mRNA OS=Homo sapiens PE=2 SV=1	1.33197	1	1	1	976	107.988	6.64	111.1	85	130.4	87.8	98.3	87.3	108.833	91.1333	0.264029
O00299	CLIC1	Chloride intracellular channel protein 1 OS=Homo sapiens GN=CLIC1 PE=1 SV=4	24.8963	5	5	5	241	26.906	5.17	102.5	102.3	121.8	89.8	85.6	98	108.867	91.1333	0.0752128
Q7Z738	PCDH12	PCDH12 protein OS=Homo sapiens GN=PCDH12 PE=2 SV=1	5.98147	4	4	4	1187	129.153	5.26	111.7	92.2	122.9	94.9	84	94.4	108.933	91.1	0.138236
Q9UJJ9	GNPTG	N-acetylglucosamine-1-phosphotransferase subunit gamma OS=Homo sapiens GN=GNPTG PE=1 SV=1	35.4098	7	13	7	305	33.952	6.95	113	100.3	113.5	96.1	85.6	91.5	108.933	91.0667	0.0277034
P0CG39	POTEJ	POTE ankyrin domain family member J OS=Homo sapiens GN=POTEJ PE=3 SV=1	5.49133	4	7	1	1038	117.315	5.97	84.9	123.4	118.5	102.5	70.4	100.2	108.933	91.0333	0.323621
A0A024R2E5	CNTN4	Contactin 4, isoform CRA_c OS=Homo sapiens GN=CNTN4 PE=4 SV=1	2.24172	2	2	2	1026	113.383	7.47	121.1	97.5	108.4	84.8	90.1	98.3	109	91.0667	0.0848872
A0A0S2Z4G4	TPM3	Tropomyosin 3 isoform 1 (Fragment) OS=Homo sapiens GN=TPM3 PE=2 SV=1	25.8065	6	6	4	248	29.015	4.78	99	114.6	113.3	85.5	86.7	100.9	108.967	91.0333	0.0632598
A8K8Z4		cDNA FLJ78071, highly similar to Human MHC class III complement component C6 mRNA OS=Homo sapiens PE=2 SV=1	52.3555	41	353	1	934	104.649	6.62	157.9	83.7	85.5	97	86.2	89.7	109.033	90.9667	0.504159
V9HW12	HEL-S-2a	Epididymis secretory sperm binding protein Li 2a OS=Homo sapiens GN=HEL-S-2a PE=2 SV=1	40.9091	10	40	9	198	21.878	5.97	118.6	96.7	112.1	84.2	93.5	94.9	109.133	90.8667	0.0668582
Q0VDC6	FKBP1A	FKBP1A protein OS=Homo sapiens GN=FKBP1A PE=1 SV=1	9.65517	1	2	1	145	15.679	9.17	75.4	93.4	158.7	111	94.3	67.1	109.167	90.8	0.552465
A0PK02	PLXNB2	PLXNB2 protein OS=Homo sapiens GN=PLXNB2 PE=2 SV=1	8.04598	3	3	1	522	56.241	6.58	114.8	101.9	110.9	102.2	86	84.2	109.2	90.8	0.0555755
P49641	MAN2A2	Alpha-mannosidase 2x OS=Homo sapiens GN=MAN2A2 PE=2 SV=3	5.13043	5	5	5	1150	130.457	6.84	129.3	83.3	115.1	80	98.8	93.6	109.233	90.8	0.278385
Q6P089	IGH@	IGH@ protein OS=Homo sapiens GN=IGH@ PE=2 SV=1	45.625	14	181	1	480	51.965	6.32	118.8	113.2	95.6	74.1	117.9	80.3	109.2	90.7667	0.296482
B2RMS9	ITIH4	Inter-alpha (Globulin) inhibitor H4 (Plasma Kallikrein-sensitive glycoprotein) OS=Homo sapiens GN=ITIH4 PE=2 SV=1	55.8065	43	743	2	930	103.298	6.98	101.4	119.4	106.9	98.1	90.7	83.5	109.233	90.7667	0.0530387
Q9NY97	B3GNT2	N-acetyllactosaminide beta-1,3-N-acetylglucosaminyltransferase 2 OS=Homo sapiens GN=B3GNT2 PE=1 SV=2	11.5869	3	3	3	397	45.993	8.54	124.5	90.3	112.9	88.4	88.9	95	109.233	90.7667	0.146355
O15204	ADAMDEC1	ADAM DEC1 OS=Homo sapiens GN=ADAMDEC1 PE=1 SV=2	3.19149	1	2	1	470	52.742	7.34	87.3	114.2	126.3	104	76.7	91.5	109.267	90.7333	0.25522
D3DPK5	SH3BGRL3	SH3 domain binding glutamic acid-rich protein like 3, isoform CRA_a (Fragment) OS=Homo sapiens GN=SH3BGRL3 PE=4 SV=1	7.393	2	2	2	257	26.803	8.38	82	106.5	139.4	97.8	74.9	99.4	109.3	90.7	0.369631
A0A0B4J1X5	IGHV3-74	Protein IGHV3-74 (Fragment) OS=Homo sapiens GN=IGHV3-74 PE=1 SV=1	24.7863	3	16	1	117	12.831	8.66	82.3	199	46.6	62.5	171.6	37.9	109.3	90.6667	0.777671
B2R7N9		cDNA, FLJ93532, highly similar to Homo sapiens osteomodulin (OMD), mRNA OS=Homo sapiens PE=2 SV=1	5.70071	2	5	2	421	49.391	5.52	127.8	84.2	116	88.2	91.7	92.1	109.333	90.6667	0.226684
A0A0A0MRZ8	IGKV3D-11	Protein IGKV3D-11 (Fragment) OS=Homo sapiens GN=IGKV3D-11 PE=4 SV=6	26.087	2	4	1	115	12.617	5.29	152.5	76.7	98.9	77.8	113.2	81	109.367	90.6667	0.498921
A0A075B6N9	IGHM	Ig mu chain C region (Fragment) OS=Homo sapiens GN=IGHM PE=1 SV=2	61.3687	23	279	5	453	49.409	6.77	102	129.2	96.9	85.9	107.1	78.9	109.367	90.6333	0.226791
A0A024R782	BPGM	Phosphoglycerate mutase OS=Homo sapiens GN=BPGM PE=2 SV=1	27.7992	6	11	6	259	29.987	6.54	127	97.9	103.3	87.2	93.1	91.6	109.4	90.6333	0.10847
P12318	FCGR2A	Low affinity immunoglobulin gamma Fc region receptor II-a OS=Homo sapiens GN=FCGR2A PE=1 SV=4	17.6656	3	3	3	317	34.978	6.68	126.8	101.8	99.6	94.2	86.9	90.7	109.4	90.6	0.104253
D3DNU8	KNG1	Kininogen 1, isoform CRA_a OS=Homo sapiens GN=KNG1 PE=4 SV=1	56.6745	30	749	2	427	47.823	6.65	96.7	122.2	109.6	89.4	79.2	102.9	109.5	90.5	0.13209
P34096	RNASE4	Ribonuclease 4 OS=Homo sapiens GN=RNASE4 PE=1 SV=3	33.3333	5	11	5	147	16.829	9.03	125	101.3	102.3	99.3	89.7	82.4	109.533	90.4667	0.105737
A0A068LN07		Ig heavy chain variable region (Fragment) OS=Homo sapiens PE=2 SV=1	22.2222	2	2	1	117	12.888	7.97	96.6	148.1	84	91.8	117.1	62.2	109.567	90.3667	0.48891
Q16891	IMMT	MICOS complex subunit MIC60 OS=Homo sapiens GN=IMMT PE=1 SV=1	1.58311	1	1	1	758	83.626	6.48	145	79.5	104.5	68.6	117.4	85	109.667	90.3333	0.463397
P23528	CFL1	Cofilin-1 OS=Homo sapiens GN=CFL1 PE=1 SV=3	50	7	11	7	166	18.491	8.09	90.8	115.8	122.5	91.2	82.6	97	109.7	90.2667	0.138253
A0A0A0MTH3	ILK	Integrin-linked protein kinase OS=Homo sapiens GN=ILK PE=1 SV=1	5.17598	2	2	2	483	54.577	7.97	93.9	119.3	115.9	84.8	90.9	95.1	109.7	90.2667	0.0842966
Q15828	CST6	Cystatin-M OS=Homo sapiens GN=CST6 PE=1 SV=1	6.71141	1	1	1	149	16.5	8.09	123.3	83.6	122.3	94.9	84.4	91.5	109.733	90.2667	0.220821
P08567	PLEK	Pleckstrin OS=Homo sapiens GN=PLEK PE=1 SV=3	10.8571	2	3	2	350	40.099	8.28	86.5	118	124.9	84.9	88.6	97	109.8	90.1667	0.187076
A8K2X4		cDNA FLJ75401, highly similar to Homo sapiens endoglin (Osler-Rendu-Weber syndrome 1), mRNA OS=Homo sapiens PE=2 SV=1	10.6383	6	9	6	658	70.503	6.61	123.9	92.5	113.2	91.5	82.3	96.6	109.867	90.1333	0.123013
A0A0G2JNP3	LILRB5	Leukocyte immunoglobulin-like receptor subfamily B member 5 OS=Homo sapiens GN=LILRB5 PE=1 SV=1	4.82115	2	2	2	643	70.129	6.73	125.2	98.6	105.9	76.8	90.3	103.1	109.9	90.0667	0.145241
P28074	PSMB5	Proteasome subunit beta type-5 OS=Homo sapiens GN=PSMB5 PE=1 SV=3	11.0266	2	2	2	263	28.462	6.92	87.4	93.3	149.2	97.6	76	96.6	109.967	90.0667	0.395161
B1AHL2	FBLN1	Fibulin-1 OS=Homo sapiens GN=FBLN1 PE=1 SV=1	38.2802	21	77	1	721	78.277	5.39	174.1	70.9	84.8	75	104.3	90.8	109.933	90.0333	0.583633
A0A109PSY4		MS-A1 light chain variable region (Fragment) OS=Homo sapiens PE=2 SV=1	16.9811	1	1	1	106	11.369	8.48	131.8	124.6	73.7	114.5	100.8	54.5	110.033	89.9333	0.478909
P01706	IGLV2-11	Immunoglobulin lambda variable 2-11 OS=Homo sapiens GN=IGLV2-11 PE=1 SV=2	13.4454	2	3	1	119	12.636	7.24	135.1	93.9	101.3	94.2	92.6	82.9	110.1	89.9	0.199683
B0BCY7	ENPEP	Glutamyl aminopeptidase (Aminopeptidase A) OS=Homo sapiens GN=ENPEP PE=2 SV=1	7.41902	5	7	5	957	109.162	5.47	138.5	84	108	81.6	92.5	95.5	110.167	89.8667	0.281606
Q9UL78		Myosin-reactive immunoglobulin light chain variable region (Fragment) OS=Homo sapiens PE=2 SV=1	59.633	4	30	1	109	11.639	8.29	87.9	148.1	94.4	84.7	116.7	68.1	110.133	89.8333	0.442077
A0A0B4J2B5	IGHV3OR16-9	Protein IGHV3OR16-9 (Fragment) OS=Homo sapiens GN=IGHV3OR16-9 PE=1 SV=1	41.8367	3	33	1	98	10.65	8.46	117	128	85.5	84	108.5	77	110.167	89.8333	0.270577
Q13231	CHIT1	Chitotriosidase-1 OS=Homo sapiens GN=CHIT1 PE=1 SV=1	3.00429	1	1	1	466	51.648	6.96	155.2	94.5	81	81.8	99	88.5	110.233	89.7667	0.430437
Q04721	NOTCH2	Neurogenic locus notch homolog protein 2 OS=Homo sapiens GN=NOTCH2 PE=1 SV=3	0.809389	1	1	1	2471	265.226	5.14	108.5	100.6	121.9	94.3	95.5	79.3	110.333	89.7	0.0637439
A2MYD4	V2-7	V2-7 protein (Fragment) OS=Homo sapiens GN=V2-7 PE=4 SV=1	53.125	4	13	2	96	10.346	5.01	119.9	126.4	84.9	102	103	63.8	110.4	89.6	0.317707
Q7Z7Q0	APOB	APOB protein OS=Homo sapiens GN=APOB PE=2 SV=1	65.3333	54	1067	1	825	92.275	7.42	180.4	109.4	41.7	138.9	100.8	28.8	110.5	89.5	0.703976
A7LFP5	MANBA	Beta-mannosidase OS=Homo sapiens GN=MANBA PE=2 SV=1	3.18544	2	2	2	879	100.809	5.68	92.4	95.3	144	96.6	77.6	94.2	110.567	89.4667	0.300804
B7Z7Z4		cDNA FLJ61611, highly similar to Zinc finger and BTB domain-containing protein 37 OS=Homo sapiens PE=2 SV=1	4.57256	1	1	1	503	55.972	6.86	115.7	97.1	119	71	101.2	96.1	110.6	89.4333	0.141004
A0A0X9V981		MS-A2 light chain variable region (Fragment) OS=Homo sapiens PE=2 SV=1	16.8224	1	2	1	107	11.461	8.47	96.3	178.8	56.6	89.8	128.1	50.3	110.567	89.4	0.644013
A0A0X9USK2		MS-A6 heavy chain variable region (Fragment) OS=Homo sapiens PE=2 SV=1	10.1695	1	2	1	118	12.724	8.44	116.5	131.5	84	80.1	122.1	65.9	110.667	89.3667	0.386535
P09668	CTSH	Pro-cathepsin H OS=Homo sapiens GN=CTSH PE=1 SV=4	3.8806	1	1	1	335	37.369	8.07	133.2	97	101.8	83.4	84.1	100.5	110.667	89.3333	0.167042
B4DUA7	MED29	Intersex-like (Drosophila) OS=Homo sapiens GN=MED29 PE=1 SV=1	6.33484	1	1	1	221	23.458	8.16	105.9	107.7	118.4	108.2	87.1	72.6	110.667	89.3	0.125224
A0A0X9UWL5		GCT-A5 light chain variable region (Fragment) OS=Homo sapiens PE=2 SV=1	35.3982	3	16	1	113	12.46	6.58	96.7	161.3	74.4	83.1	123.1	61.4	110.8	89.2	0.533159
A0A0C4DFX3	EMILIN1	EMILIN-1 OS=Homo sapiens GN=EMILIN1 PE=1 SV=1	0.885827	1	1	1	1016	106.629	5.17	175.1	62.8	94.5	72.4	102.1	93	110.8	89.1667	0.565307
A0A0B4J1V6	IGHV3-73	Protein IGHV3-73 (Fragment) OS=Homo sapiens GN=IGHV3-73 PE=1 SV=1	24.3697	3	4	1	119	12.849	9.17	132.8	110.6	89.2	103.1	89.9	74.5	110.867	89.1667	0.222986
Q6N030	DKFZp686I15212	Uncharacterized protein OS=Homo sapiens GN=DKFZp686I15212 PE=1 SV=1	36.1004	14	221	6	518	56.983	8.05	126	115.4	91.2	92.7	94	80.6	110.867	89.1	0.122584
A0A087WXI5	CDH1	Cadherin-1 OS=Homo sapiens GN=CDH1 PE=1 SV=1	8.19491	6	10	6	903	99.965	4.79	120.7	97	115.2	83.9	79.4	103.7	110.967	89	0.10093
A0A0X9TD47		MS-D1 light chain variable region (Fragment) OS=Homo sapiens PE=2 SV=1	31.7757	3	14	1	107	11.649	8.51	113.3	133.7	86.2	85.6	122.1	59.1	111.067	88.9333	0.387855
A0A024R0T8	APOC1	Apolipoprotein C-I, isoform CRA_a OS=Homo sapiens GN=APOC1 PE=4 SV=1	26.506	4	8	4	83	9.326	8.47	141.6	113.1	78.6	70.2	119.2	77.4	111.1	88.9333	0.403873
P04003	C4BPA	C4b-binding protein alpha chain OS=Homo sapiens GN=C4BPA PE=1 SV=2	64.4891	33	500	1	597	66.989	7.3	87.6	141.6	104.2	137.2	71.6	57.8	111.133	88.8667	0.488759
Q86UX7	FERMT3	Fermitin family homolog 3 OS=Homo sapiens GN=FERMT3 PE=1 SV=1	10.045	5	8	5	667	75.905	6.98	94.2	120.2	119	86.9	87.8	91.8	111.133	88.8333	0.0606163
O60234	GMFG	Glia maturation factor gamma OS=Homo sapiens GN=GMFG PE=1 SV=1	11.2676	1	1	1	142	16.79	5.26	104.8	120	108.7	81.3	82.5	102.7	111.167	88.8333	0.0546984
S6BGD4		IgG H chain OS=Homo sapiens PE=2 SV=1	17.094	3	12	1	234	25	9.48	109.4	128.9	95.3	86.9	105.1	74.3	111.2	88.7667	0.164992
A0A024R9J3	COLEC10	Collectin sub-family member 10 (C-type lectin), isoform CRA_a OS=Homo sapiens GN=COLEC10 PE=4 SV=1	8.66426	2	4	2	277	30.685	7.33	110.7	104	118.9	88	108	70.3	111.2	88.7667	0.127925
B7Z9B1		cDNA FLJ52398, highly similar to Cadherin-13 OS=Homo sapiens PE=2 SV=1	9.47368	5	13	5	760	83.356	5.12	134.2	86.6	112.9	88.1	80.4	97.7	111.233	88.7333	0.199318
Q86TI0	TBC1D1	TBC1 domain family member 1 OS=Homo sapiens GN=TBC1D1 PE=1 SV=2	0.941781	1	1	1	1168	133	6.96	96.7	113.7	123.6	98	76.6	91.4	111.333	88.6667	0.087909
Q0ZCI6		Immunglobulin heavy chain variable region (Fragment) OS=Homo sapiens PE=4 SV=1	32.7869	4	6	1	122	13.625	8.43	163	111.4	59.7	140.9	88.6	36.4	111.367	88.6333	0.620414
B4E3D4		cDNA FLJ56293, highly similar to Transmembrane glycoprotein NMB OS=Homo sapiens PE=2 SV=1	1.4827	1	2	1	607	68.03	6.19	143.4	91.6	99.1	86.5	87.1	92.3	111.367	88.6333	0.234788
P19021	PAM	Peptidyl-glycine alpha-amidating monooxygenase OS=Homo sapiens GN=PAM PE=1 SV=2	4.9332	3	3	3	973	108.263	6.42	133	90.8	110.3	82.1	87.1	96.7	111.367	88.6333	0.153404
A0A075B6R2	IGHV4-4	Protein IGHV4-4 (Fragment) OS=Homo sapiens GN=IGHV4-4 PE=1 SV=2	19.6581	2	12	1	117	12.84	9.6	96.6	117.1	120.5	86.8	105.4	73.5	111.4	88.5667	0.127148
Q7LGC8	CHST3	Carbohydrate sulfotransferase 3 OS=Homo sapiens GN=CHST3 PE=1 SV=3	3.34029	1	1	1	479	54.671	8.59	130.4	98.4	105.7	80.6	95.4	89.6	111.5	88.5333	0.0960864
A0A125QYY5		GCT-A9 light chain variable region (Fragment) OS=Homo sapiens PE=2 SV=1	31.7757	2	11	1	107	11.603	4.65	96	108.9	129.7	74.9	92.5	98	111.533	88.4667	0.127832
Q14126	DSG2	Desmoglein-2 OS=Homo sapiens GN=DSG2 PE=1 SV=2	9.74955	8	15	8	1118	122.218	5.24	133.1	98.6	103	89.2	82.2	93.9	111.567	88.4333	0.11144
B6EDE2	HEL180	Epididymis luminal protein 180 (Fragment) OS=Homo sapiens GN=HEL180 PE=2 SV=1	17.8862	2	7	1	123	13.28	5.45	87.4	158.1	89.3	89.6	118.8	56.7	111.6	88.3667	0.473177
P00492	HPRT1	Hypoxanthine-guanine phosphoribosyltransferase OS=Homo sapiens GN=HPRT1 PE=1 SV=2	10.5505	2	2	2	218	24.564	6.68	123.6	90.4	120.9	91.1	77.7	96.2	111.633	88.3333	0.123904
P23470	PTPRG	Receptor-type tyrosine-protein phosphatase gamma OS=Homo sapiens GN=PTPRG PE=1 SV=4	4.84429	6	11	6	1445	161.901	6.42	110.4	94.8	129.9	87.9	77.7	99.2	111.7	88.2667	0.120314
P07307	ASGR2	Asialoglycoprotein receptor 2 OS=Homo sapiens GN=ASGR2 PE=1 SV=2	26.045	4	4	4	311	35.07	6.25	92.4	104.3	138.8	86	89.7	88.9	111.833	88.2	0.165708
A8K3F6		cDNA FLJ77654, highly similar to Homo sapiens guanine nucleotide binding protein (G protein), beta polypeptide 4 (GNB4), mRNA OS=Homo sapiens PE=2 SV=1	4.11765	1	1	1	340	37.557	6	51.6	159.4	124.5	158.3	55.5	50.8	111.833	88.2	0.64367
Q9UL83		Myosin-reactive immunoglobulin light chain variable region (Fragment) OS=Homo sapiens PE=2 SV=1	36.1111	2	11	1	108	11.827	8.68	126.5	126.1	82.9	90.8	101.9	71.8	111.833	88.1667	0.234616
A2J1M8		Rheumatoid factor RF-IP12 (Fragment) OS=Homo sapiens PE=2 SV=1	21.0526	2	2	1	95	10.678	7.99	114.7	131.2	89.7	79	115.8	69.5	111.867	88.1	0.269804
A0A024R6Y5	DPEP2	Dipeptidase OS=Homo sapiens GN=DPEP2 PE=3 SV=1	15.0206	5	6	5	486	53.331	6.54	114.3	100.8	120.5	81.4	80.3	102.6	111.867	88.1	0.0629282
B2R773		cDNA, FLJ93312, highly similar to Homo sapiens adipose most abundant gene transcript 1 (APM1), mRNA OS=Homo sapiens PE=2 SV=1	29.5082	4	54	4	244	26.409	5.74	100	112.6	123.1	87.3	78.9	98	111.9	88.0667	0.0514002
A0A068LKR7		Ig heavy chain variable region (Fragment) OS=Homo sapiens PE=2 SV=1	32.8	3	16	1	125	13.936	9.01	129.6	143.5	62.7	88	122	54.2	111.933	88.0667	0.493453
A0A075B6H6	IGKC	Ig kappa chain C region (Fragment) OS=Homo sapiens GN=IGKC PE=1 SV=1	82.243	8	237	1	107	11.712	5.87	97.8	159.1	79.3	81	125.4	57.3	112.067	87.9	0.483189
Q6P5S8	IGK@	IGK@ protein OS=Homo sapiens GN=IGK@ PE=1 SV=1	47.8814	10	253	1	236	25.757	6.33	112.1	145.5	78.8	90.5	117.5	55.7	112.133	87.9	0.40867
A0A068LRW6		Ig heavy chain variable region (Fragment) OS=Homo sapiens PE=2 SV=1	5.51181	1	3	1	127	13.995	8.15	191.3	104.2	41	122.6	99	42	112.167	87.8667	0.650526
Q9HCB6	SPON1	Spondin-1 OS=Homo sapiens GN=SPON1 PE=1 SV=2	5.45229	2	2	2	807	90.914	6.11	116.1	93.9	126.5	85.6	87.8	90.1	112.167	87.8333	0.066184
Q6UXB8	PI16	Peptidase inhibitor 16 OS=Homo sapiens GN=PI16 PE=1 SV=1	14.4708	5	14	2	463	49.44	5.39	105.4	95.3	135.9	93.6	75.4	94.4	112.2	87.8	0.14928
P19256	CD58	Lymphocyte function-associated antigen 3 OS=Homo sapiens GN=CD58 PE=1 SV=1	4	1	1	1	250	28.129	6.76	147.6	74.6	114.5	78.6	87.7	97.1	112.233	87.8	0.324513
J3KQE5	RAN	GTP-binding nuclear protein Ran (Fragment) OS=Homo sapiens GN=RAN PE=1 SV=1	3.4188	1	1	1	234	26.799	9.58	84.8	103.9	148.1	93.1	83.4	86.6	112.267	87.7	0.264827
H0YI79	DNM1L	Dynamin-1-like protein (Fragment) OS=Homo sapiens GN=DNM1L PE=1 SV=1	27.0833	1	1	1	48	5.564	7.9	146.6	86.5	103.7	76.7	104.3	82.1	112.267	87.7	0.281778
V9HWC9	HEL-S-44	Superoxide dismutase [Cu-Zn] OS=Homo sapiens GN=HEL-S-44 PE=2 SV=1	41.5584	4	6	4	154	15.926	6.13	108.8	88.8	139.5	85.6	83.6	93.7	112.367	87.6333	0.175957
Q7Z351	DKFZp686N02209	Putative uncharacterized protein DKFZp686N02209 OS=Homo sapiens GN=DKFZp686N02209 PE=2 SV=1	29.668	11	84	1	482	52.819	8.48	120.5	93.9	122.9	91.2	89.6	81.9	112.433	87.5667	0.0628535
P00748	F12	Coagulation factor XII OS=Homo sapiens GN=F12 PE=1 SV=3	32.0325	14	74	1	615	67.748	7.74	90.7	121.2	125.4	101.2	93.1	68.4	112.433	87.5667	0.166567
Q6N091	DKFZp686C02220	Putative uncharacterized protein DKFZp686C02220 (Fragment) OS=Homo sapiens GN=DKFZp686C02220 PE=2 SV=1	37.6	10	122	3	500	54.126	6.34	129.8	118.1	89.4	83.9	104.8	74	112.433	87.5667	0.173788
P48507	GCLM	Glutamate--cysteine ligase regulatory subunit OS=Homo sapiens GN=GCLM PE=1 SV=1	5.47445	1	1	1	274	30.708	6.02	135.6	85.4	116.3	94	87.1	81.6	112.433	87.5667	0.173903
A0A024R462	FN1	Fibronectin 1, isoform CRA_n OS=Homo sapiens GN=FN1 PE=4 SV=1	61.6985	102	1522	58	2355	259.049	5.73	104.3	120.5	112.7	84.7	104.9	73	112.5	87.5333	0.0747766
O60888	CUTA	Protein CutA OS=Homo sapiens GN=CUTA PE=1 SV=2	7.82123	1	1	1	179	19.104	5.5	128.7	89.5	119.4	89.1	85.7	87.6	112.533	87.4667	0.102211
A0A024QZL1	PRG1	Proteoglycan 1, secretory granule, isoform CRA_a OS=Homo sapiens GN=PRG1 PE=4 SV=1	8.22785	1	2	1	158	17.613	4.86	95.6	102.5	139.8	89.7	86.1	86.3	112.633	87.3667	0.140604
P20062	TCN2	Transcobalamin-2 OS=Homo sapiens GN=TCN2 PE=1 SV=3	3.74707	1	1	1	427	47.505	7.01	118.2	103.8	115.9	106.5	77.1	78.4	112.633	87.3333	0.0750548
A0A0K0K1L1	HEL-S-282	Epididymis secretory protein Li 282 OS=Homo sapiens GN=HEL-S-282 PE=2 SV=1	51.5385	11	37	11	260	29.158	7.74	125.7	94.1	118.4	87.7	86.1	88	112.733	87.2667	0.0563295
Q59HB3		Apolipoprotein B variant (Fragment) OS=Homo sapiens PE=2 SV=1	57.4613	92	1495	1	1615	183.465	6.8	134.9	99.8	103.9	93.3	76	92.2	112.867	87.1667	0.107147
P04196	HRG	Histidine-rich glycoprotein OS=Homo sapiens GN=HRG PE=1 SV=1	55.4286	23	421	1	525	59.541	7.5	168.8	92.3	77.5	120.1	71.8	69.4	112.867	87.1	0.47552
P00915	CA1	Carbonic anhydrase 1 OS=Homo sapiens GN=CA1 PE=1 SV=2	62.8352	13	230	4	261	28.852	7.12	125.7	93.8	119.2	91.1	79.5	90.7	112.9	87.1	0.0690066
Q9H8M5	CNNM2	Metal transporter CNNM2 OS=Homo sapiens GN=CNNM2 PE=1 SV=2	0.8	1	1	1	875	96.562	6.38	103	138.3	97.9	93.2	93.9	73.7	113.067	86.9333	0.142136
Q86TT1		Full-length cDNA clone CS0DD006YL02 of Neuroblastoma of Homo sapiens (human) OS=Homo sapiens PE=2 SV=1	61.8667	19	220	1	375	41.247	6.79	76.1	185.6	78.1	75.3	118.5	66.4	113.267	86.7333	0.539419
B3KXB6		cDNA FLJ45101 fis, clone BRAWH3032298, highly similar to Tenascin-N OS=Homo sapiens PE=2 SV=1	1.84758	1	1	1	1299	143.814	5.63	139	111	89.9	74.9	83.7	101.4	113.3	86.6667	0.17584
B2R582		cDNA, FLJ92374, highly similar to Homo sapiens C-type lectin domain family 3, member B (CLEC3B), mRNA OS=Homo sapiens PE=2 SV=1	58.4158	12	105	1	202	22.522	6.04	155	80.6	104.4	83.6	79.7	96.7	113.333	86.6667	0.30213
A8K1K1		cDNA FLJ76342, highly similar to Homo sapiens carnosine dipeptidase 1 (metallopeptidase M20 family)(CNDP1), mRNA OS=Homo sapiens PE=2 SV=1	39.2505	17	61	17	507	56.698	5.36	105.3	104.3	130.6	83.7	78.5	97.5	113.4	86.5667	0.0597922
P09622	DLD	Dihydrolipoyl dehydrogenase, mitochondrial OS=Homo sapiens GN=DLD PE=1 SV=2	7.66208	3	3	3	509	54.143	7.85	209.8	53.2	77.3	77.5	73.5	108.6	113.433	86.5333	0.618647
D3DQH8	SPARC	Secreted protein, acidic, cysteine-rich (Osteonectin), isoform CRA_a OS=Homo sapiens GN=SPARC PE=4 SV=1	18.7302	4	7	4	315	36.027	4.88	94	105.3	141.3	76.1	83	100.3	113.533	86.4667	0.165451
Q9UL70		Myosin-reactive immunoglobulin light chain variable region (Fragment) OS=Homo sapiens PE=2 SV=1	39.8148	3	11	2	108	11.626	9.36	137.6	105.9	97.4	92.8	91.1	75.3	113.633	86.4	0.11271
A0A0E3KII0	LDLR	Low density lipoprotein receptor (Fragment) OS=Homo sapiens GN=LDLR PE=4 SV=1	11.6071	1	2	1	112	12.573	7.34	81.4	103.6	155.9	86	92.6	80.5	113.633	86.3667	0.289645
A0A075B6H7	IGKV3-7	Protein IGKV3-7 (Fragment) OS=Homo sapiens GN=IGKV3-7 PE=1 SV=1	23.2759	2	6	1	116	12.775	5.25	98.1	154	88.9	97	103.4	58.6	113.667	86.3333	0.330306
A0A068LRW4		Ig heavy chain variable region (Fragment) OS=Homo sapiens PE=2 SV=1	20.8333	2	3	2	120	13.05	7.93	105.5	138.9	96.6	77.5	107.5	74	113.667	86.3333	0.176979
A2J1N4		Rheumatoid factor RF-IP24 (Fragment) OS=Homo sapiens PE=2 SV=1	27.551	2	9	1	98	10.834	7.97	134.8	96.7	109.6	91.9	89.6	77.4	113.7	86.3	0.0855187
V9HW62	HEL-S-74	Lactoylglutathione lyase OS=Homo sapiens GN=HEL-S-74 PE=2 SV=1	9.23913	2	2	2	184	20.706	5.47	117.8	86.6	136.8	82.1	81	95.8	113.733	86.3	0.149208
Q9UK23	NAGPA	N-acetylglucosamine-1-phosphodiester alpha-N-acetylglucosaminidase OS=Homo sapiens GN=NAGPA PE=1 SV=2	1.35922	1	1	1	515	56.037	6.6	112.3	92.5	136.8	63.5	77.3	117.5	113.867	86.1	0.249973
A0A087WW89	IGHV3-72	Protein IGHV3-72 OS=Homo sapiens GN=IGHV3-72 PE=1 SV=1	36.6337	3	30	1	101	11.16	7.97	151.2	93.7	96.8	105.8	92	60.5	113.9	86.1	0.29308
P51884	LUM	Lumican OS=Homo sapiens GN=LUM PE=1 SV=2	43.1953	14	204	14	338	38.405	6.61	130.5	104.6	106.7	81.7	77.9	98.5	113.933	86.0333	0.0556981
A0A109PW33		MS-C1 light chain variable region (Fragment) OS=Homo sapiens PE=2 SV=1	25.9259	2	10	1	108	11.789	6.57	163.6	101.3	77	97.9	96.8	63.4	113.967	86.0333	0.37744
Q96AP7	ESAM	Endothelial cell-selective adhesion molecule OS=Homo sapiens GN=ESAM PE=1 SV=1	4.10256	1	1	1	390	41.151	9.32	123.8	78.1	140.7	79.1	105.4	72.9	114.2	85.8	0.251151
B4DJ06		cDNA FLJ56620 OS=Homo sapiens PE=2 SV=1	1.74881	1	1	1	629	67.904	4.91	121.9	79	142.2	82.8	82.6	91.5	114.367	85.6333	0.202278
Q9NTU7	CBLN4	Cerebellin-4 OS=Homo sapiens GN=CBLN4 PE=1 SV=1	13.9303	2	2	2	201	21.794	8.73	114.9	102.1	126.6	93.4	66.4	96.6	114.533	85.4667	0.0711311
O43909	EXTL3	Exostosin-like 3 OS=Homo sapiens GN=EXTL3 PE=1 SV=1	0.979325	1	1	1	919	104.682	6.51	107.7	103.8	132.2	99.4	77.6	79.4	114.567	85.4667	0.0617136
P37802	TAGLN2	Transgelin-2 OS=Homo sapiens GN=TAGLN2 PE=1 SV=3	20.1005	3	6	3	199	22.377	8.25	78.5	148.2	117	87.7	71.1	97.5	114.567	85.4333	0.248342
A0A0X9T7T4		MS-D3 heavy chain variable region (Fragment) OS=Homo sapiens PE=2 SV=1	34.3284	4	32	2	134	15.042	5.92	110.7	156.4	76.6	93	107.3	56	114.567	85.4333	0.352462
Q6MZU6	DKFZp686C15213	Putative uncharacterized protein DKFZp686C15213 OS=Homo sapiens GN=DKFZp686C15213 PE=2 SV=1	31.25	11	110	3	464	51.066	7.71	96.3	182.3	65.3	70.4	128.3	57.6	114.633	85.4333	0.517652
Q15257	PPP2R4	Serine/threonine-protein phosphatase 2A activator OS=Homo sapiens GN=PPP2R4 PE=1 SV=3	3.63128	1	1	1	358	40.641	5.94	117.4	97.1	130.3	87.7	73.1	94.5	114.933	85.1	0.0610262
A0A024RAN2	CAST	Calpastatin, isoform CRA_a OS=Homo sapiens GN=CAST PE=4 SV=1	2.11706	1	1	1	803	86.561	5.14	154.3	83.6	106.9	85	85.7	84.5	114.933	85.0667	0.224441
M0QZP7	ATP5SL	ATP synthase subunit s-like protein (Fragment) OS=Homo sapiens GN=ATP5SL PE=1 SV=1	7.33333	1	1	1	150	16.935	5.05	91.1	132.4	121.3	86.2	79	90	114.933	85.0667	0.0792356
Q92823	NRCAM	Neuronal cell adhesion molecule OS=Homo sapiens GN=NRCAM PE=1 SV=3	5.67485	5	5	5	1304	143.8	5.66	150.6	82.7	111.7	83	84	88	115	85	0.203009
P06132	UROD	Uroporphyrinogen decarboxylase OS=Homo sapiens GN=UROD PE=1 SV=2	4.08719	1	1	1	367	40.761	6.14	125.2	85	134.9	77.7	108	69.2	115.033	84.9667	0.194028
A0A087WTF6	NCAM1	Neural cell adhesion molecule 1 OS=Homo sapiens GN=NCAM1 PE=1 SV=1	25.2358	16	31	1	848	93.272	4.87	99.8	104.9	140.9	91.1	65.5	97.9	115.2	84.8333	0.135321
B1N7B7		Cryocrystalglobulin CC2 heavy chain variable region (Fragment) OS=Homo sapiens PE=2 SV=1	15.7025	1	1	1	121	13.427	8.88	117.5	144.3	84.2	89.7	109.5	54.8	115.333	84.6667	0.263949
P07686	HEXB	Beta-hexosaminidase subunit beta OS=Homo sapiens GN=HEXB PE=1 SV=3	3.95683	2	3	2	556	63.071	6.76	79.2	172.9	94	86.6	89.2	78.1	115.367	84.6333	0.353039
A0A0X9V9B3		MS-F1 light chain variable region (Fragment) OS=Homo sapiens PE=2 SV=1	33.0357	2	2	2	112	12.1	5.96	123	155.5	68.5	84.4	110.7	57.8	115.667	84.3	0.349337
Q9UBG0	MRC2	C-type mannose receptor 2 OS=Homo sapiens GN=MRC2 PE=1 SV=2	1.41988	1	4	1	1479	166.568	5.83	109.5	103	135	89.4	72.4	90.8	115.833	84.2	0.0502864
A0A087WX77	NCAM1	Neural cell adhesion molecule 1 OS=Homo sapiens GN=NCAM1 PE=1 SV=1	25.1748	16	31	1	858	94.484	4.87	89	86.1	172.6	79.4	72	101	115.9	84.1333	0.344574
P04278	SHBG	Sex hormone-binding globulin OS=Homo sapiens GN=SHBG PE=1 SV=2	54.2289	15	47	15	402	43.752	6.71	141.5	91.4	114.9	96.8	80.1	75.3	115.933	84.0667	0.11508
P12814	ACTN1	Alpha-actinin-1 OS=Homo sapiens GN=ACTN1 PE=1 SV=2	13.3408	8	12	8	892	102.993	5.41	82	150.9	115.3	88.7	74.9	88.2	116.067	83.9333	0.190344
O95497	VNN1	Pantetheinase OS=Homo sapiens GN=VNN1 PE=1 SV=2	20.8577	8	13	8	513	56.975	5.55	79	128.5	140.8	72.3	91	88.4	116.1	83.9	0.178728
P01591	JCHAIN	Immunoglobulin J chain OS=Homo sapiens GN=JCHAIN PE=1 SV=4	56.6038	6	49	6	159	18.087	5.24	103.5	158.5	86.4	85	101.3	65.4	116.133	83.9	0.252048
A0A024R877	ALAD	Delta-aminolevulinic acid dehydratase OS=Homo sapiens GN=ALAD PE=3 SV=1	20.649	5	7	5	339	37.205	6.84	140.3	96.4	112	80	84	87.3	116.233	83.7667	0.067233
A0A0X9T7V9		GCT-A4 light chain variable region (Fragment) OS=Homo sapiens PE=2 SV=1	44.9541	4	9	2	109	11.838	8.47	106.7	158.7	84.5	73.8	114.9	61.4	116.633	83.3667	0.289848
K7ER74	APOC4-APOC2	Protein APOC4-APOC2 OS=Homo sapiens GN=APOC4-APOC2 PE=1 SV=1	35.9551	7	56	5	178	20.036	6.64	95.6	146.2	108.3	75.3	106.7	68	116.7	83.3333	0.158662
X6RBG4	UMOD	Uromodulin OS=Homo sapiens GN=UMOD PE=1 SV=1	3.62845	2	2	2	689	75.613	5.87	119.6	88.2	142.3	85.2	75.9	88.8	116.7	83.3	0.107436
A0A0G2JMW3	CDHR5	Cadherin-related family member 5 OS=Homo sapiens GN=CDHR5 PE=1 SV=1	4.49704	2	2	2	845	88.074	4.91	125.4	102.7	122	79.1	68.7	102.1	116.7	83.3	0.0512881
A2KBC4		Anti-TN-C scFv (Fragment) OS=Homo sapiens PE=2 SV=1	42.8571	7	31	2	238	25.148	8.41	148.5	107.9	93.8	81.8	99.4	68.5	116.733	83.2333	0.147367
A0A0F7T891	IGHV5-51	IGHV5-51 protein (Fragment) OS=Homo sapiens GN=IGHV5-51 PE=4 SV=1	29.2453	2	6	1	106	11.499	8.43	110.5	178.5	61.7	67.5	125.5	56.3	116.9	83.1	0.446607
Q6ZW64		cDNA FLJ41552 fis, clone COLON2004478, highly similar to Protein Tro alpha1 H,myeloma OS=Homo sapiens PE=2 SV=1	43.7247	17	218	3	494	53.287	6.52	104.9	142.6	103.2	75.4	114.1	59.7	116.9	83.0667	0.176776
Q05DH5	EXTL2	EXTL2 protein (Fragment) OS=Homo sapiens GN=EXTL2 PE=2 SV=1	11.4804	3	3	3	331	37.556	9.14	139.1	94.6	117.2	79	84.9	85.2	116.967	83.0333	0.0594565
Q6GMX4	IGL@	IGL@ protein OS=Homo sapiens GN=IGL@ PE=1 SV=1	40.2542	8	129	1	236	24.794	6.89	104.8	97.9	148.9	84.4	88.1	76	117.2	82.8333	0.10374
Q5FWF9	IGL@	IGL@ protein OS=Homo sapiens GN=IGL@ PE=1 SV=1	41.3793	8	99	1	232	24.779	5.59	197.5	60.6	94.2	74.4	68.4	104.9	117.433	82.5667	0.460155
H7C5H1	CFB	Complement factor B (Fragment) OS=Homo sapiens GN=CFB PE=1 SV=1	73.4426	26	298	1	305	34.67	7.06	177.5	90.1	85.2	90.8	68.5	87.8	117.6	82.3667	0.316273
Q9UNU2	C4B	Complement protein C4B frameshift mutant (Fragment) OS=Homo sapiens GN=C4B PE=4 SV=1	55.0847	14	358	1	354	38.114	8.53	56.3	116.2	182.7	48	82.9	114	118.4	81.6333	0.422438
S6B2A6		IgG H chain OS=Homo sapiens PE=2 SV=1	14.6667	4	13	1	300	32.147	7.25	92.2	172.8	90.1	74.1	114.2	56.5	118.367	81.6	0.316375
P04430	IGKV1-16	Immunoglobulin kappa variable 1-16 OS=Homo sapiens GN=IGKV1-16 PE=1 SV=2	13.6752	1	3	1	117	12.61	8.16	114.8	100.5	140	87.6	95.9	61.2	118.433	81.5667	0.0771434
A0A024R2Q7	CLEC3B	C-type lectin domain family 3, member B, isoform CRA_a OS=Homo sapiens GN=CLEC3B PE=4 SV=1	58.4158	12	78	1	202	22.522	5.67	84.4	195.4	76.4	64.8	124.7	54.3	118.733	81.2667	0.444577
Q13421	MSLN	Mesothelin OS=Homo sapiens GN=MSLN PE=1 SV=2	5.39683	3	5	3	630	68.942	6.38	145.4	89.1	123	80.3	77.6	84.6	119.167	80.8333	0.0807432
E7EX88	ACAN	Aggrecan core protein OS=Homo sapiens GN=ACAN PE=1 SV=2	1.3834	2	2	2	2530	261.169	4.13	156.5	82.9	118.5	73.3	74.9	94	119.3	80.7333	0.1583
A8K479		cDNA FLJ77094, highly similar to Homo sapiens apolipoprotein B (including Ag(x) antigen) (APOB), mRNA (Fragment) OS=Homo sapiens PE=2 SV=1	57.5022	63	1033	1	1113	123.747	7.01	89.6	129.1	139.1	88.6	76.7	76.8	119.267	80.7	0.0690091
Q13275	SEMA3F	Semaphorin-3F OS=Homo sapiens GN=SEMA3F PE=2 SV=2	1.91083	1	1	1	785	88.325	8.27	123.8	75.6	159	84.6	69.7	87.4	119.467	80.5667	0.191674
B5BU24	YWHAB	14-3-3 protein beta/alpha OS=Homo sapiens GN=YWHAB PE=2 SV=1	15.0407	3	6	1	246	28.095	4.83	151.5	90.4	118.1	92.4	69.2	78.4	120	80	0.101851
A0A0F7G8J1	PLG	Plasminogen OS=Homo sapiens GN=PLG PE=2 SV=1	8.89988	9	54	1	809	90.569	7.36	118.8	88.9	152.6	85.9	72.2	81.6	120.1	79.9	0.099779
Q6MZQ6	DKFZp686G11190	Putative uncharacterized protein DKFZp686G11190 OS=Homo sapiens GN=DKFZp686G11190 PE=2 SV=1	32.2105	12	85	1	475	52.01	8.06	94.6	171.8	95.8	85.2	100.3	52.2	120.733	79.2333	0.228552
P06396	GSN	Gelsolin OS=Homo sapiens GN=GSN PE=1 SV=1	53.3248	34	330	1	782	85.644	6.28	150.8	102.5	110.1	78.1	72	86.5	121.133	78.8667	0.053308
Q8TC05	MDM1	Nuclear protein MDM1 OS=Homo sapiens GN=MDM1 PE=1 SV=2	1.12045	1	1	1	714	80.686	9.11	158.5	95.6	109.8	60.7	81.3	94.2	121.3	78.7333	0.117564
V9H1C1		Gelsolin exon 4 (Fragment) OS=Homo sapiens PE=4 SV=1	34.7826	3	23	1	69	7.974	5.78	142.9	114.9	107.1	82.5	56.7	95.9	121.633	78.3667	0.0522327
A0A5E4		Uncharacterized protein OS=Homo sapiens PE=2 SV=1	37.4468	8	133	1	235	24.731	5.94	132.8	144.3	88.4	95.8	90.2	48.5	121.833	78.1667	0.126145
P02771	AFP	Alpha-fetoprotein OS=Homo sapiens GN=AFP PE=1 SV=1	55.9934	25	81	25	609	68.633	5.68	103.1	92.8	169.7	71.6	62.8	100.1	121.867	78.1667	0.175759
P02775	PPBP	Platelet basic protein OS=Homo sapiens GN=PPBP PE=1 SV=3	44.5312	7	26	7	128	13.885	8.79	98.4	109.9	158.2	78.3	78.6	76.7	122.167	77.8667	0.0730094
Q9HCC1		Single chain Fv (Fragment) OS=Homo sapiens PE=1 SV=1	36.6071	3	19	1	112	12.235	8.47	114.3	151.7	101.4	70.2	113.9	48.5	122.467	77.5333	0.139858
Q96CW5	TUBGCP3	Gamma-tubulin complex component 3 OS=Homo sapiens GN=TUBGCP3 PE=1 SV=2	1.98456	1	1	1	907	103.506	8.12	169.2	84.5	113.7	83.3	79.3	70	122.467	77.5333	0.148548
Q9Y4D7	PLXND1	Plexin-D1 OS=Homo sapiens GN=PLXND1 PE=1 SV=3	1.19481	1	1	1	1925	211.871	7.15	109.1	99.1	159.5	88.1	75.2	69	122.567	77.4333	0.0818294
A0A0M3KKW6		Fab Hu 15C1 Heavy chain OS=Homo sapiens PE=1 SV=1	18.6667	3	10	1	225	24.059	8.85	132.5	146.4	89.6	85.1	85.3	61	122.833	77.1333	0.0729425
B3KP77		cDNA FLJ31310 fis, clone LIVER1000165, highly similar to Haptoglobin OS=Homo sapiens PE=2 SV=1	56.1404	15	551	1	228	25.456	6.71	61.8	190.4	117.8	96.5	86.5	47	123.333	76.6667	0.310014
S6B2B6		IgG H chain OS=Homo sapiens PE=2 SV=1	12.7273	3	10	1	275	29.342	8.68	103.1	135.9	132.6	90.8	89	48.6	123.867	76.1333	0.0507067
A0A0A0MSG0	WIPF3	WAS/WASL-interacting protein family member 3 OS=Homo sapiens GN=WIPF3 PE=1 SV=1	3.72671	1	1	1	483	49.318	9.99	89.9	104.7	178.1	86.4	72.2	68.6	124.233	75.7333	0.156067
A0A024R9Q1	THBS1	Thrombospondin 1, isoform CRA_a OS=Homo sapiens GN=THBS1 PE=4 SV=1	33.5897	30	68	1	1170	129.27	4.94	85.6	96.3	192.4	88.7	46.1	90.9	124.767	75.2333	0.251196
B4DU16		cDNA FLJ54550, highly similar to Homo sapiens fibronectin 1 (FN1), transcript variant 6, mRNA OS=Homo sapiens PE=2 SV=1	70.5817	43	680	1	894	98.095	6.24	73.9	163.3	139.8	99	71.1	52.8	125.667	74.3	0.161368
Q2KHM9	KIAA0753	Protein moonraker OS=Homo sapiens GN=KIAA0753 PE=1 SV=3	1.24095	1	1	1	967	109.339	7.68	232.2	68.3	76.8	44.5	88.5	89.8	125.767	74.2667	0.404536
B0YIW2	APOC3	Apolipoprotein C-III OS=Homo sapiens GN=APOC3 PE=1 SV=1	47.0085	5	29	5	117	12.807	8.18	169.3	111.5	97.7	59.3	96.9	65.2	126.167	73.8	0.102757
A5PLK9	BMP1	Metalloendopeptidase OS=Homo sapiens GN=BMP1 PE=2 SV=1	1.0142	1	1	1	986	111.178	6.83	186.9	82.6	111.1	78.7	80	60.8	126.867	73.1667	0.165869
Q0ZCF6		Immunglobulin heavy chain variable region (Fragment) OS=Homo sapiens PE=4 SV=1	17.8295	2	4	1	129	14.538	8.78	151.5	137.3	92.9	83.1	99.9	35.4	127.233	72.8	0.105995
Q5CZ94	DKFZp781M0386	Putative uncharacterized protein DKFZp781M0386 OS=Homo sapiens GN=DKFZp781M0386 PE=2 SV=1	37.1795	8	108	2	234	24.986	7.27	112.5	82.6	188.8	80.1	80.4	55.5	127.967	72	0.161917
A0A109PP82		MS-C2 light chain variable region (Fragment) OS=Homo sapiens PE=2 SV=1	14.0187	1	1	1	107	11.717	8.5	152.8	150.1	87.9	75.3	93	41	130.267	69.7667	0.0814841
Q6PIL0	IGHV7-81	IGHV7-81 protein OS=Homo sapiens GN=IGHV7-81 PE=2 SV=1	5.6	1	1	1	125	13.904	7.96	50.5	244.8	96	44.9	120.6	43.2	130.433	69.5667	0.395322
J3KQ32	OLA1	Obg-like ATPase 1 OS=Homo sapiens GN=OLA1 PE=1 SV=1	2.64423	1	1	1	416	46.908	8.06	186.9	105.9	99.8	68.1	68	71.3	130.867	69.1333	0.092914
O75556	SCGB2A1	Mammaglobin-B OS=Homo sapiens GN=SCGB2A1 PE=1 SV=1	18.9474	1	1	1	95	10.876	5.78	126.8	83.1	185.2	83.7	51.1	70.1	131.7	68.3	0.110705
Q9GZP4	PITHD1	PITH domain-containing protein 1 OS=Homo sapiens GN=PITHD1 PE=1 SV=1	5.21327	1	1	1	211	24.163	5.74	117.6	77.1	209.3	66.7	70.9	58.5	134.667	65.3667	0.152413
Q15147	PLCB4	1-phosphatidylinositol 4,5-bisphosphate phosphodiesterase beta-4 OS=Homo sapiens GN=PLCB4 PE=1 SV=3	1.10638	1	1	1	1175	134.378	6.9	299.9	69.6	48.7	58.7	62.6	60.5	139.4	60.6	0.38298
B7Z6F7		cDNA FLJ61705, highly similar to Symplekin OS=Homo sapiens PE=2 SV=1	0.549451	1	1	1	1274	141.043	6.13	66.9	156.1	219.3	52.9	49.7	55.1	147.433	52.5667	0.0985753
